# Supplementary material for: Integrative Proteomics and Phosphoproteomics Analysis of the Rat Adenohypophysis after GnRH Treatment
Source: MDPI journal article supplement (doi:10.3390/ijms24043339), 2023-02-07
Supplement: s1 [file s1]

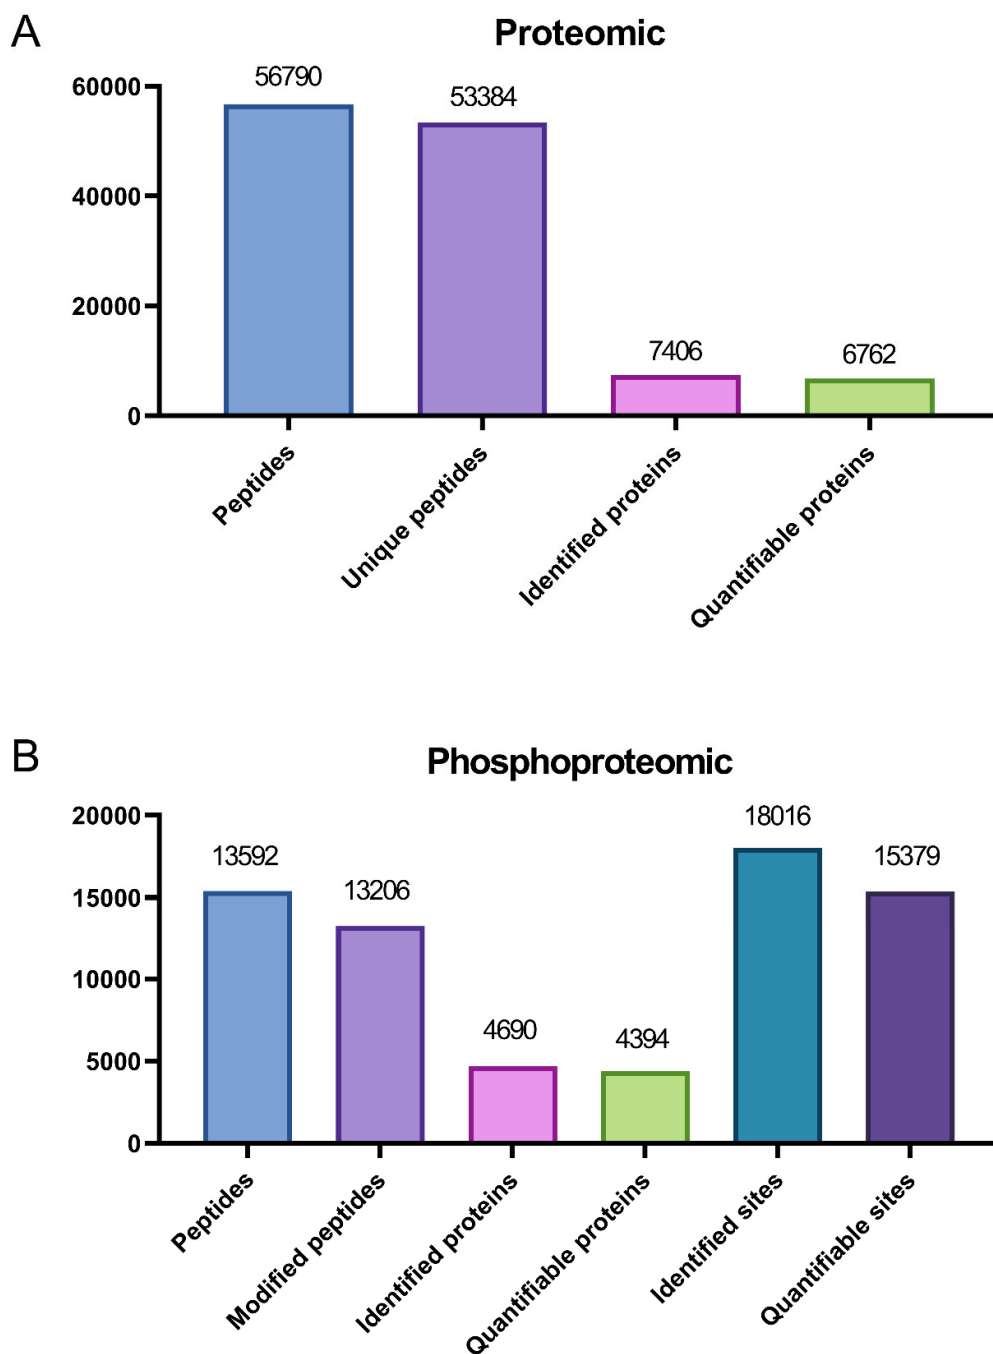

**Figure S1.** Basic statistics of mass spectrometry data in proteomics(A) and phosphoproteomics(B).

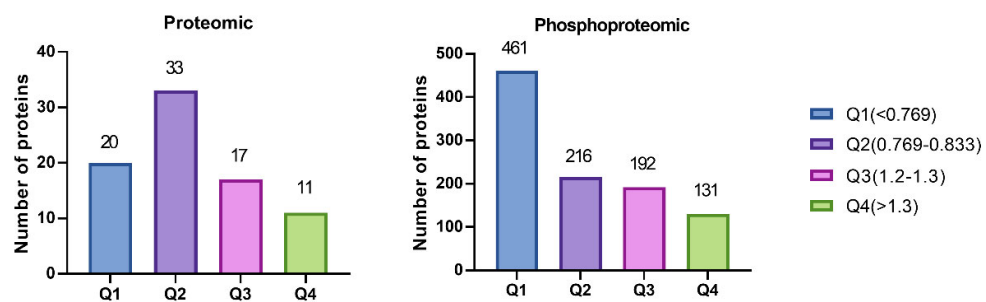

**Figure S2.** Distribution of the number of differentially expressed proteins and differentially modified sites in the Q1-Q4 groups.

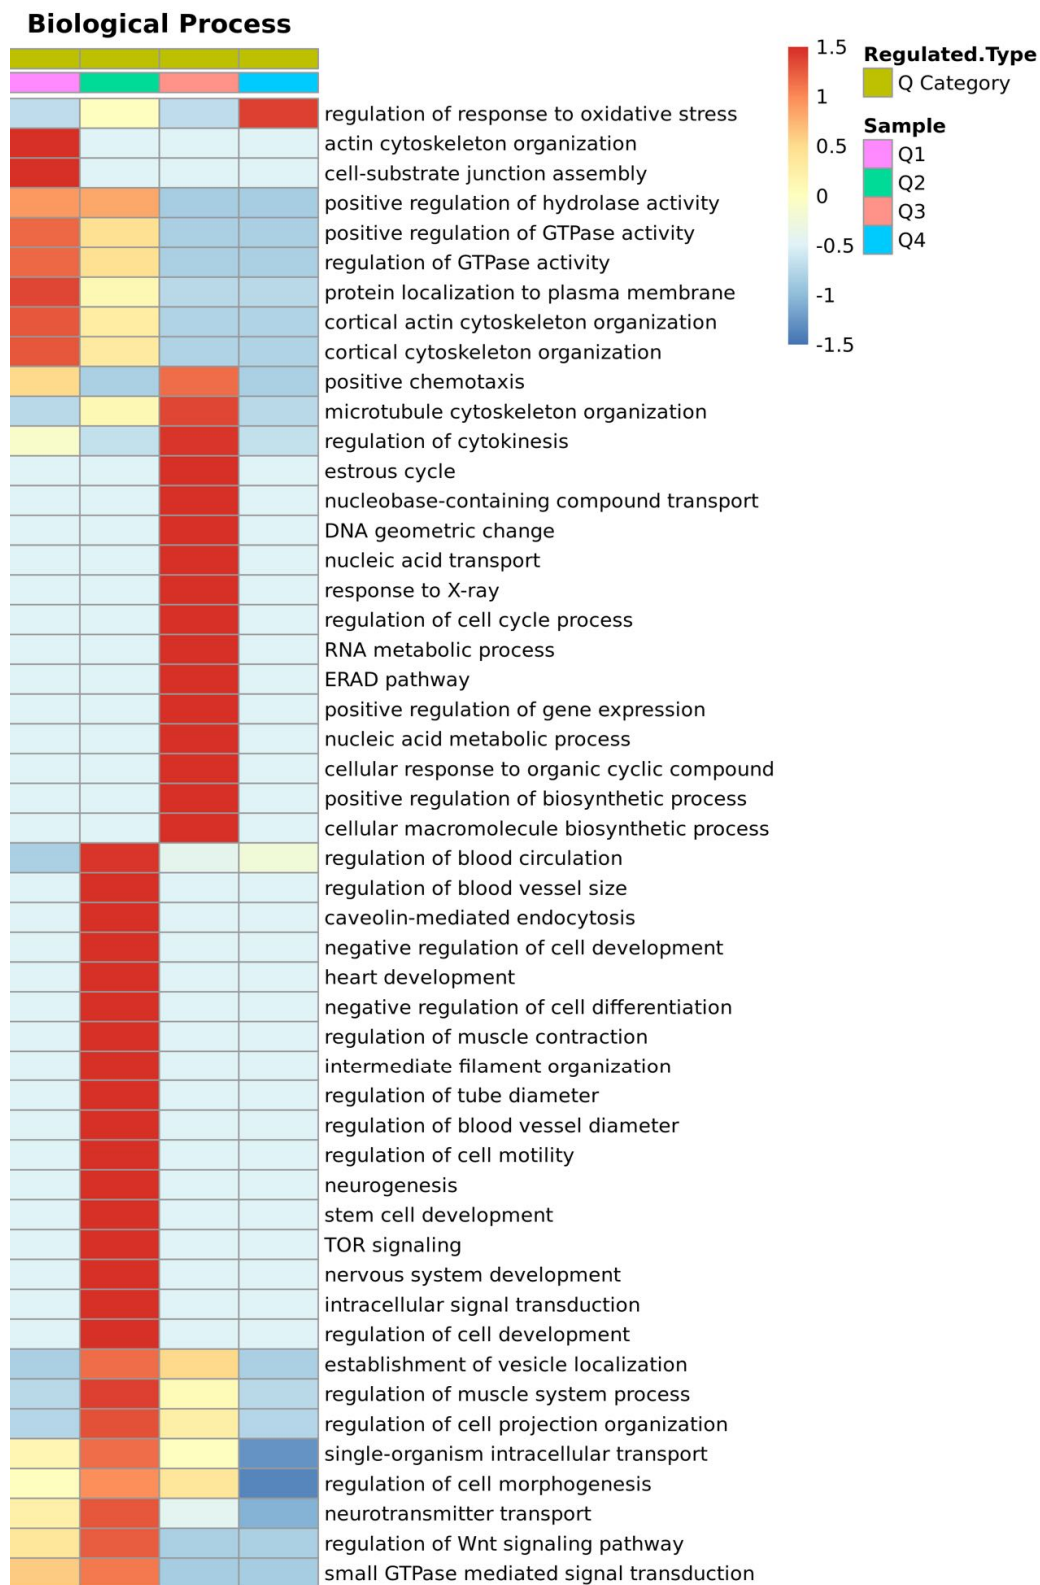

**Figure S3.** Heatmap for cluster analysis of DEPPs based on the biological process module of GO classification.

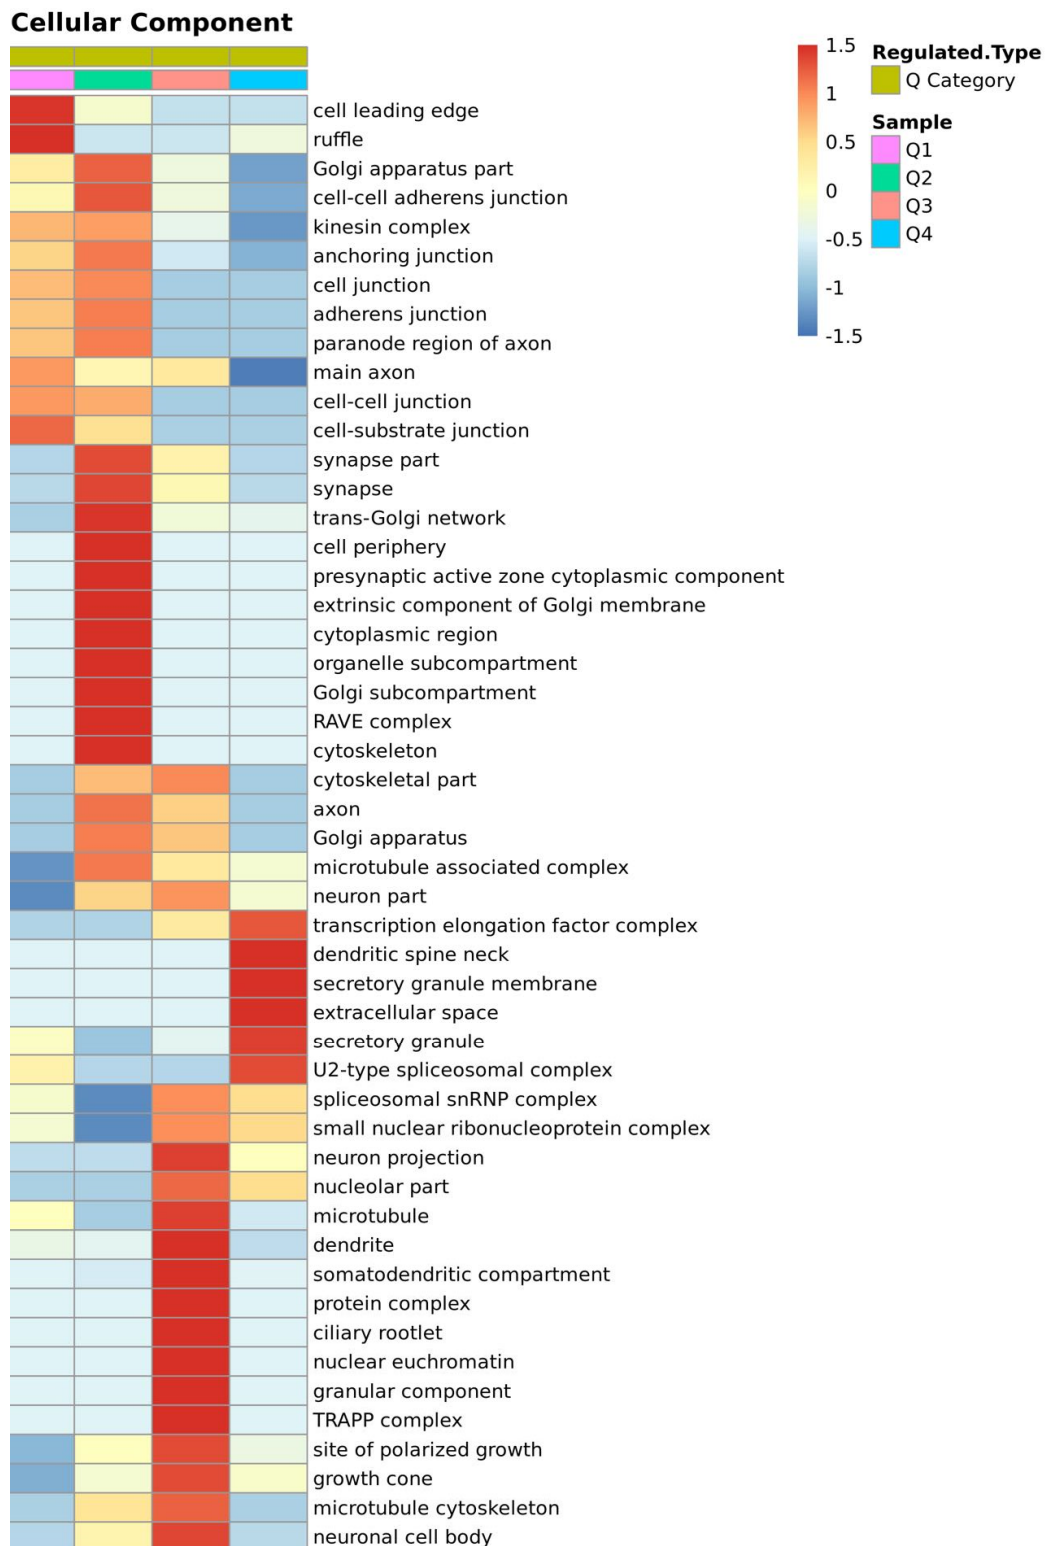

**Figure S4.** Heatmap for cluster analysis of DEPPs based on the cellular component module of GO classification.

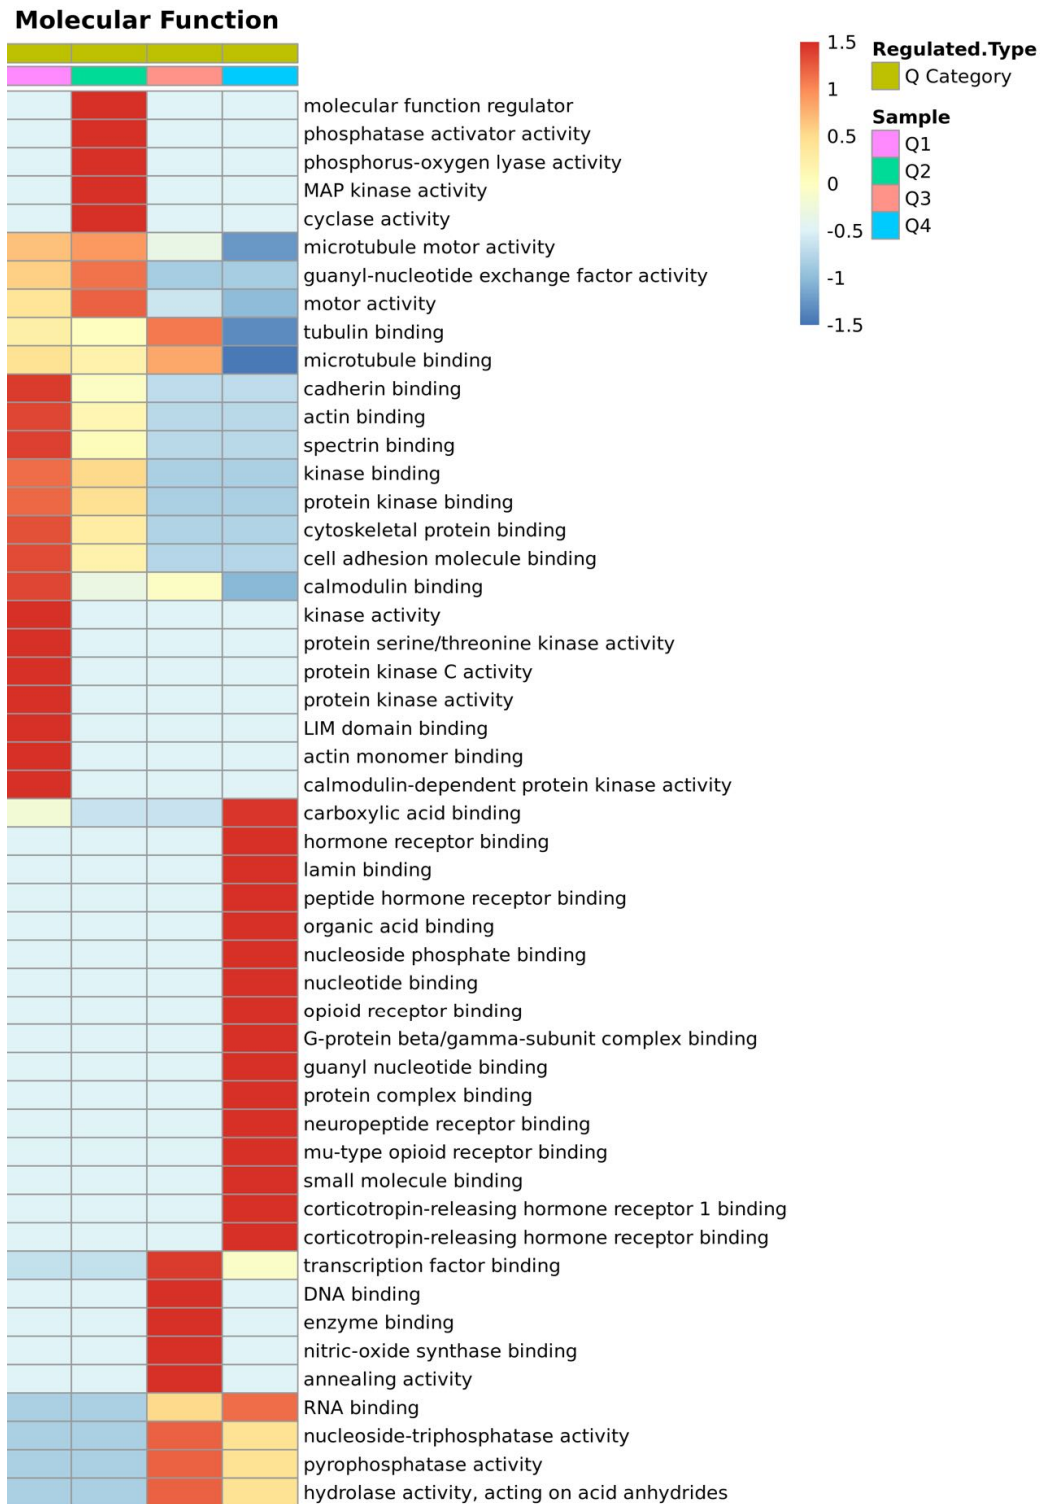

**Figure S5.** Heatmap for cluster analysis of DEPPs based on the molecular function module of GO classification.

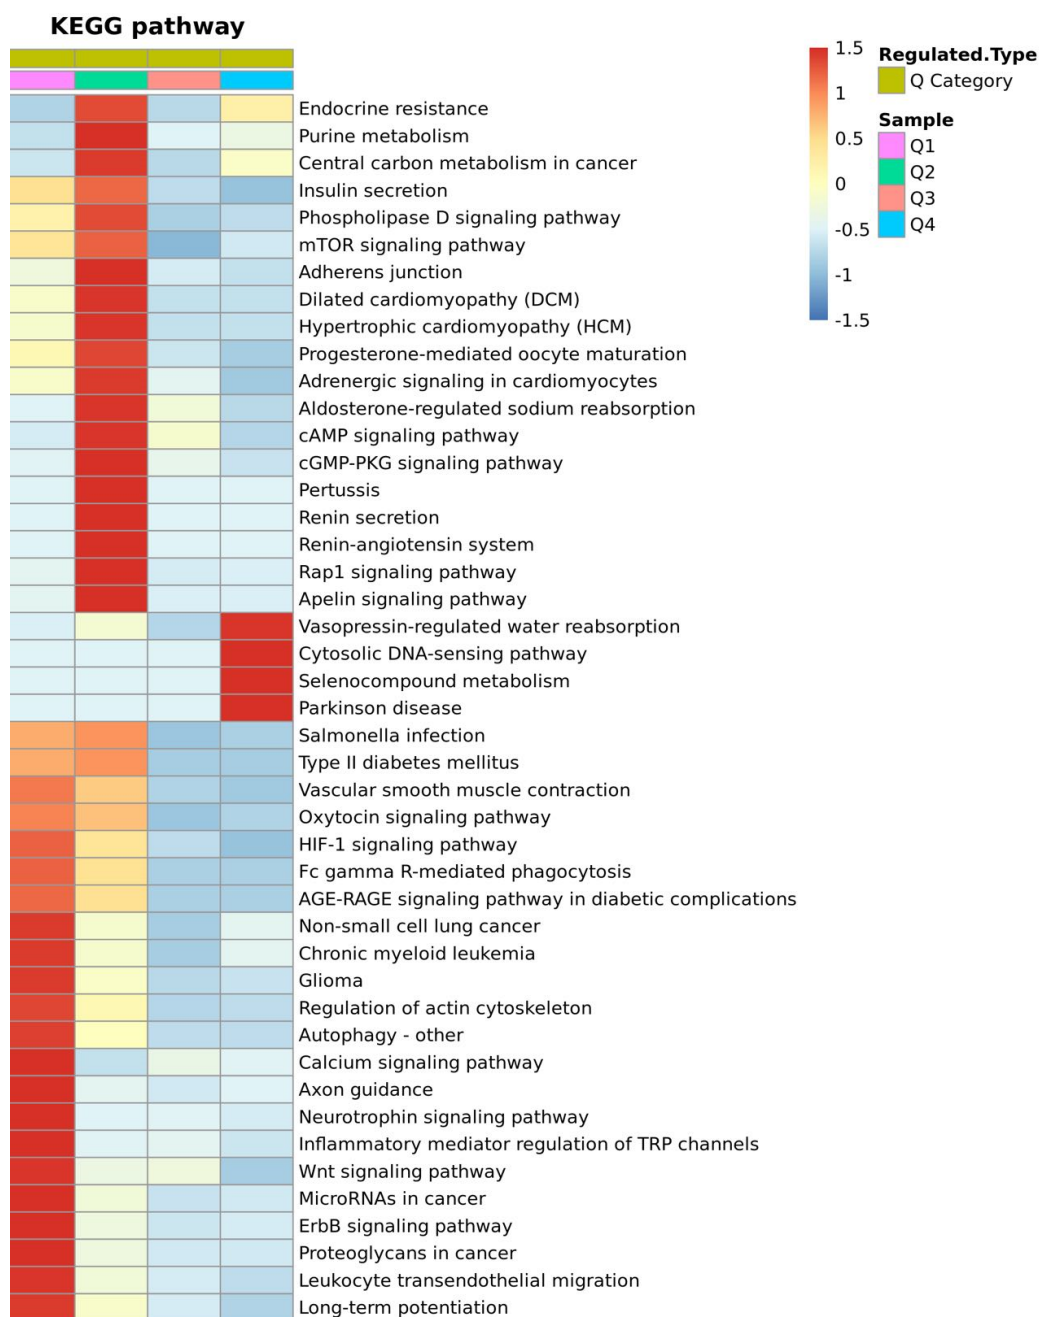

**Figure S6.** Heatmap for cluster analysis of DEPPs based on KEGG pathway analysis.

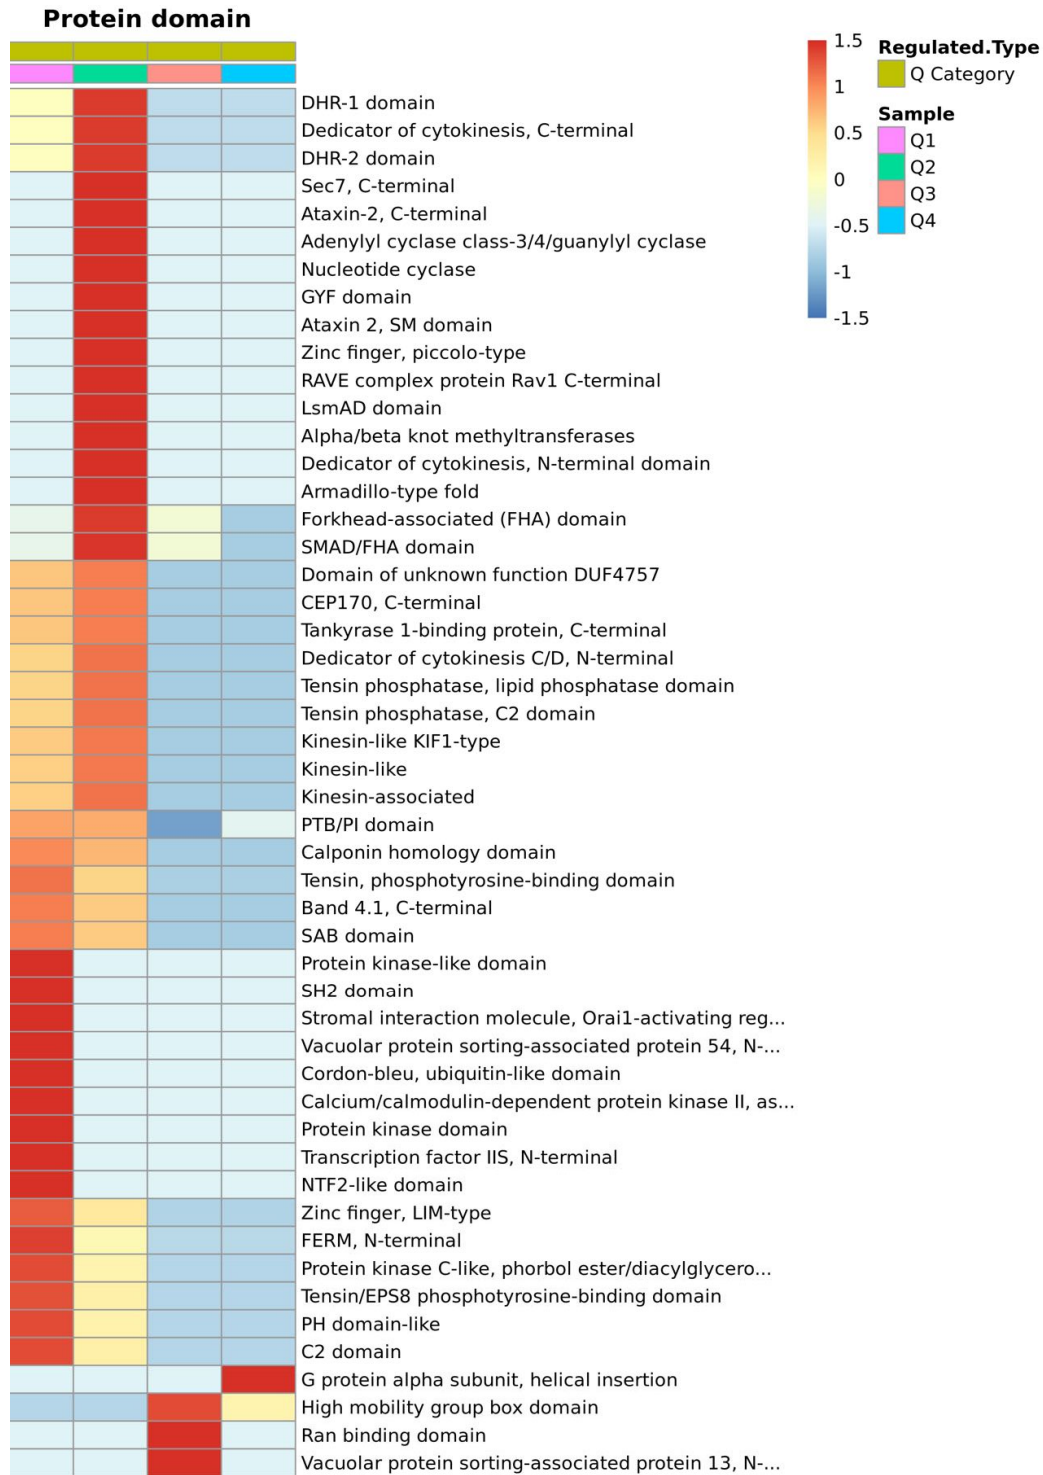

**Figure S7.** Heatmap for cluster analysis of DEPPs based on protein structural domain enrichment analysis.
