# Supplementary material for: Integrative Proteomics and Phosphoproteomics Analysis of the Rat Adenohypophysis after GnRH Treatment
Source: Int J Mol Sci. 2023 Feb 7;24(4):3339. doi: 10.3390/ijms24043339 (PMC9961725; doi:10.3390/ijms24043339)
Supplement: Supplementary file 1 [file ijms-24-03339-s001.zip]

Archive with 4 entries (4 files):
- Supplementary Figures.pdf
- Table S1 DEPs and DEPPs.xlsx
- Table S2 Phosphorylation motif analysis.xlsx
- Table S3 Transcription factors.xlsx
