# Supplementary material for: Integrative Proteomics and Phosphoproteomics Analysis of the Rat Adenohypophysis after GnRH Treatment
Source: Int J Mol Sci. 2023 Feb 7;24(4):3339. doi: 10.3390/ijms24043339 (PMC9961725; doi:10.3390/ijms24043339)
Supplement: Supplementary file 1 [file ijms-24-03339-s001.zip › Table S1 DEPs and DEPPs.xlsx]

## Sheet: proteomic
Protein accession	Protein description	GnRH/NC Ratio	Regulated Type	GnRH/NC P value	Gene name	MW [kDa]	Coverage [%]	Peptides	PSMs	Unique peptides	GnRH_1	GnRH_2	GnRH_3	NC_1	NC_2	NC_3	Subcellular localization	Biological Process	Cellular Component	Molecular Function	KEGG KO No.	KEGG Gene	KEGG pathway	IPR ID	Domain description
G3V6N8	Guanine nucleotide binding protein, alpha 15 OS=Rattus norvegicus OX=10116 GN=Gna15 PE=4 SV=1	0.66	Down	0.0130753	Gna15	43.359	3.5	1	1	1	0.891	0.723	0.781	1.394	1.151	1.085	mitochondria	GO:0050794 regulation of cellular process; GO:0044700 single organism signaling; GO:0065008 regulation of biological quality; GO:0072503 cellular divalent inorganic cation homeostasis; GO:0030003 cellular cation homeostasis; GO:0051480 regulation of cytosolic calcium ion concentration; GO:0044699 single-organism process; GO:0050896 response to stimulus; GO:0055082 cellular chemical homeostasis; G…	GO:0005623 cell;	GO:1901265 nucleoside phosphate binding; GO:0005102 receptor binding; GO:0031683 G-protein beta/gamma-subunit complex binding; GO:0016817 hydrolase activity, acting on acid anhydrides; GO:0005515 protein binding; GO:0016787 hydrolase activity; GO:0004871 signal transducer activity; GO:1901363 heterocyclic compound binding; GO:0097159 organic cyclic compound binding; GO:0016462 pyrophosphatase act…	K04637	GNA15; guanine nucleotide-binding protein subunit alpha-15	rno04020 Calcium signaling pathway - Rattus norvegicus (rat); rno04926 Relaxin signaling pathway - Rattus norvegicus (rat); rno05142 Chagas disease (American trypanosomiasis) - Rattus norvegicus (rat); rno05146 Amoebiasis - Rattus norvegicus (rat);	IPR027417; IPR011025;	P-loop containing nucleoside triphosphate hydrolase; G protein alpha subunit, helical insertion;
F1M013	60S ribosomal protein L7a OS=Rattus norvegicus OX=10116 GN=Rpl7a PE=4 SV=2	0.832	Down	0.0138392	Rpl7a	29.864	42.3	13	42	11	0.989	0.892	0.86	1.125	1.097	1.071	cytoplasm	GO:0044085 cellular component biogenesis; GO:0042254 ribosome biogenesis; GO:0022613 ribonucleoprotein complex biogenesis; GO:0071840 cellular component organization or biogenesis;	GO:0044464 cell part; GO:0005622 intracellular; GO:0032991 macromolecular complex; GO:0044424 intracellular part; GO:1990904 ribonucleoprotein complex; GO:0005623 cell; GO:0030529 intracellular ribonucleoprotein complex;		K02936	RP-L7Ae, RPL7A; large subunit ribosomal protein L7Ae	rno03010 Ribosome - Rattus norvegicus (rat);	IPR029064; IPR004038;	50S ribosomal protein L30e-like; Ribosomal protein L7Ae/L30e/S12e/Gadd45;
D3ZC54	Uncharacterized protein OS=Rattus norvegicus OX=10116 PE=1 SV=2	0.716	Down	0.0094629	---	13.13	26.5	3	4	2	0.822	0.87	0.82	1.186	1.026	1.294	extracellular	GO:0044700 single organism signaling; GO:0002694 regulation of leukocyte activation; GO:0016064 immunoglobulin mediated immune response; GO:0007166 cell surface receptor signaling pathway; GO:0098542 defense response to other organism; GO:0044699 single-organism process; GO:0051249 regulation of lymphocyte activation; GO:0009607 response to biotic stimulus; GO:0051234 establishment of localizatio…	GO:0016020 membrane; GO:0044421 extracellular region part; GO:0005615 extracellular space; GO:0009897 external side of plasma membrane; GO:0071944 cell periphery; GO:0042571 immunoglobulin complex, circulating; GO:0019814 immunoglobulin complex; GO:0032991 macromolecular complex; GO:0005623 cell; GO:0005576 extracellular region; GO:0005886 plasma membrane; GO:0072562 blood microparticle; GO:00444…	GO:0034987 immunoglobulin receptor binding; GO:0005515 protein binding; GO:0005102 receptor binding; GO:0003823 antigen binding; GO:0005488 binding;				IPR007110; IPR013783; IPR013106;	Immunoglobulin-like domain; Immunoglobulin-like fold; Immunoglobulin V-set domain;
D3ZTF0	Apical junction component 1 homolog OS=Rattus norvegicus OX=10116 GN=Ajm1 PE=1 SV=3	1.221	Up	0.021059	Ajm1	107.09	1.6	2	2	2	1.177	1.105	1.023	0.9	0.959	0.847	nucleus
M0RDZ5	Uncharacterized protein OS=Rattus norvegicus OX=10116 PE=4 SV=1	0.769	Down	0.0183951	---	10.439	25.3	2	4	1	0.967	0.871	0.781	1.165	1.066	1.174	extracellular	GO:0002376 immune system process; GO:0002377 immunoglobulin production; GO:0002440 production of molecular mediator of immune response; GO:0006955 immune response; GO:0050896 response to stimulus;	GO:0005615 extracellular space; GO:0044421 extracellular region part; GO:0005576 extracellular region;	GO:0005515 protein binding; GO:0005488 binding;				IPR007110; IPR013783; IPR013106;	Immunoglobulin-like domain; Immunoglobulin-like fold; Immunoglobulin V-set domain;
D4AC16	TBC1 domain family member 1 OS=Rattus norvegicus OX=10116 GN=Tbc1d1 PE=1 SV=1	0.803	Down	0.030785	Tbc1d1	142.33	6.4	7	10	5	0.912	0.855	0.913	1.033	1.254	1.049	cytoplasm	GO:0050794 regulation of cellular process; GO:0060627 regulation of vesicle-mediated transport; GO:0046907 intracellular transport; GO:0031338 regulation of vesicle fusion; GO:0015031 protein transport; GO:0051234 establishment of localization; GO:0090630 activation of GTPase activity; GO:0051649 establishment of localization in cell; GO:0051345 positive regulation of hydrolase activity; GO:00328…	GO:0012505 endomembrane system; GO:0005623 cell; GO:0005622 intracellular; GO:0044464 cell part;	GO:0031267 small GTPase binding; GO:0030234 enzyme regulator activity; GO:0017016 Ras GTPase binding; GO:0060589 nucleoside-triphosphatase regulator activity; GO:0005488 binding; GO:0030695 GTPase regulator activity; GO:0005515 protein binding; GO:0098772 molecular function regulator; GO:0051020 GTPase binding; GO:0008047 enzyme activator activity; GO:0019899 enzyme binding; GO:0017137 Rab GTPase…	K18341	TBC1D1; TBC1 domain family member 1	rno04152 AMPK signaling pathway - Rattus norvegicus (rat);	IPR011993; IPR021785; IPR000195; IPR006020;	PH domain-like; Domain of unknown function DUF3350; Rab-GTPase-TBC domain; PTB/PI domain;
A0A0G2JSP8	Creatine kinase M-type OS=Rattus norvegicus OX=10116 GN=Ckm PE=1 SV=1	0.688	Down	0.036601	Ckm	43.018	12.1	5	10	4	0.797	0.792	0.862	1.041	1.47	1.05	cytoplasm	GO:0016310 phosphorylation; GO:0046314 phosphocreatine biosynthetic process; GO:0042398 cellular modified amino acid biosynthetic process; GO:0006807 nitrogen compound metabolic process; GO:0009058 biosynthetic process; GO:1901566 organonitrogen compound biosynthetic process; GO:1901576 organic substance biosynthetic process; GO:0044237 cellular metabolic process; GO:0006796 phosphate-containing …		GO:0005524 ATP binding; GO:1901265 nucleoside phosphate binding; GO:0004111 creatine kinase activity; GO:0001882 nucleoside binding; GO:0043167 ion binding; GO:0016775 phosphotransferase activity, nitrogenous group as acceptor; GO:0000166 nucleotide binding; GO:0097159 organic cyclic compound binding; GO:1901363 heterocyclic compound binding; GO:0032549 ribonucleoside binding; GO:0097367 carbohyd…	K00933	E2.7.3.2; creatine kinase [EC:2.7.3.2]	rno00330 Arginine and proline metabolism - Rattus norvegicus (rat); rno01100 Metabolic pathways - Rattus norvegicus (rat);	IPR022413; IPR022414; IPR014746;	ATP:guanido phosphotransferase, N-terminal; ATP:guanido phosphotransferase, catalytic domain; Glutamine synthetase/guanido kinase, catalytic domain;
A0A0G2K654	Histone cluster 1 H1 family member c OS=Rattus norvegicus OX=10116 GN=Hist1h1c PE=1 SV=1	0.736	Down	0.029684	Hist1h1c	21.316	35.4	9	23	3	1.002	0.751	0.803	1.111	1.246	1.118	nucleus	GO:0044085 cellular component biogenesis; GO:0051253 negative regulation of RNA metabolic process; GO:0044237 cellular metabolic process; GO:0032259 methylation; GO:2001141 regulation of RNA biosynthetic process; GO:0008152 metabolic process; GO:0008213 protein alkylation; GO:0006334 nucleosome assembly; GO:0022607 cellular component assembly; GO:0065003 macromolecular complex assembly; GO:001055…	GO:0032991 macromolecular complex; GO:0044424 intracellular part; GO:0005623 cell; GO:0044422 organelle part; GO:0044427 chromosomal part; GO:0043228 non-membrane-bounded organelle; GO:0031974 membrane-enclosed lumen; GO:0070013 intracellular organelle lumen; GO:0044454 nuclear chromosome part; GO:0005622 intracellular; GO:0044464 cell part; GO:0005694 chromosome; GO:0000790 nuclear chromatin; GO…	GO:0097159 organic cyclic compound binding; GO:1901363 heterocyclic compound binding; GO:0003677 DNA binding; GO:0003723 RNA binding; GO:0003682 chromatin binding; GO:0031490 chromatin DNA binding; GO:0005488 binding; GO:0003676 nucleic acid binding;	K11275	H1_5; histone H1/5		IPR011991; IPR005818;	Winged helix-turn-helix DNA-binding domain; Linker histone H1/H5, domain H15;
M0R470	Unc-80 homolog, NALCN channel complex subunit OS=Rattus norvegicus OX=10116 GN=Unc80 PE=4 SV=2	0.823	Down	0.0121223	Unc80	33.214	6.4	1	1	1	0.951	0.895	0.871	1.175	1.037	1.09	cytoplasm,nucleus							IPR031542;	Cation channel complex component UNC80, N-terminal;
D4A4L2	Coiled-coil domain-containing 97 OS=Rattus norvegicus OX=10116 GN=Ccdc97 PE=1 SV=1	1.237	Up	0.024698	Ccdc97	38.692	9.1	3	4	3	1.077	1.091	1.153	0.805	0.983	0.897	cytoplasm		GO:0043229 intracellular organelle; GO:0005686 U2 snRNP; GO:0044446 intracellular organelle part; GO:0032991 macromolecular complex; GO:0044424 intracellular part; GO:0005623 cell; GO:0044422 organelle part; GO:0097525 spliceosomal snRNP complex; GO:0043231 intracellular membrane-bounded organelle; GO:0043226 organelle; GO:0005634 nucleus; GO:0044464 cell part; GO:0005622 intracellular; GO:199090…
Q02445	Tissue factor pathway inhibitor OS=Rattus norvegicus OX=10116 GN=Tfpi PE=2 SV=1	0.812	Down	0.0060968	Tfpi	34.554	9.9	2	2	2	0.925	0.844	0.927	1.151	1.112	1.058	extracellular	GO:0007596 blood coagulation; GO:0065008 regulation of biological quality; GO:0044699 single-organism process; GO:0070555 response to interleukin-1; GO:0071345 cellular response to cytokine stimulus; GO:0009607 response to biotic stimulus; GO:0009611 response to wounding; GO:0009605 response to external stimulus; GO:0010466 negative regulation of peptidase activity; GO:0070887 cellular response t…	GO:0009986 cell surface; GO:0005615 extracellular space; GO:0044421 extracellular region part; GO:0005623 cell; GO:0044464 cell part; GO:0005576 extracellular region;	GO:0004867 serine-type endopeptidase inhibitor activity; GO:0030234 enzyme regulator activity; GO:0030414 peptidase inhibitor activity; GO:0061134 peptidase regulator activity; GO:0061135 endopeptidase regulator activity; GO:0098772 molecular function regulator; GO:0004857 enzyme inhibitor activity; GO:0004866 endopeptidase inhibitor activity;	K03909	TFPI; tissue factor pathway inhibitor	rno04610 Complement and coagulation cascades - Rattus norvegicus (rat);	IPR002223;	Pancreatic trypsin inhibitor Kunitz domain;
P04218	OX-2 membrane glycoprotein OS=Rattus norvegicus OX=10116 GN=Cd200 PE=2 SV=1	0.812	Down	0.02308	Cd200	31.088	16.9	4	4	1	0.882	0.826	0.988	1.164	1.065	1.091	mitochondria	GO:0050794 regulation of cellular process; GO:0002694 regulation of leukocyte activation; GO:0043030 regulation of macrophage activation; GO:0044763 single-organism cellular process; GO:0098609 cell-cell adhesion; GO:0044699 single-organism process; GO:0048519 negative regulation of biological process; GO:0048523 negative regulation of cellular process; GO:0008037 cell recognition; GO:0050776 reg…	GO:0016020 membrane; GO:0031226 intrinsic component of plasma membrane; GO:0044459 plasma membrane part; GO:0030054 cell junction; GO:0044425 membrane part; GO:0044464 cell part; GO:0071944 cell periphery; GO:0005912 adherens junction; GO:0070161 anchoring junction; GO:0031224 intrinsic component of membrane; GO:0005913 cell-cell adherens junction; GO:0005887 integral component of plasma membrane…	GO:0050839 cell adhesion molecule binding; GO:0060089 molecular transducer activity; GO:0042802 identical protein binding; GO:0004872 receptor activity; GO:0005102 receptor binding; GO:0042803 protein homodimerization activity; GO:0005488 binding; GO:0046983 protein dimerization activity; GO:0005515 protein binding;	K06556	CD200; CD200 antigen		IPR007110; IPR013783; IPR003599; IPR013106; IPR013151;	Immunoglobulin-like domain; Immunoglobulin-like fold; Immunoglobulin subtype; Immunoglobulin V-set domain; Immunoglobulin;
F1LVL4	Uncharacterized protein OS=Rattus norvegicus OX=10116 PE=4 SV=2	0.779	Down	0.023405	---	13.087	21.8	2	4	1	0.978	0.842	0.819	1.152	1.036	1.199	extracellular	GO:0002376 immune system process; GO:0002377 immunoglobulin production; GO:0002440 production of molecular mediator of immune response; GO:0006955 immune response; GO:0050896 response to stimulus;	GO:0005615 extracellular space; GO:0044421 extracellular region part; GO:0005576 extracellular region;	GO:0005515 protein binding; GO:0005488 binding;				IPR007110; IPR013783; IPR003599; IPR013106;	Immunoglobulin-like domain; Immunoglobulin-like fold; Immunoglobulin subtype; Immunoglobulin V-set domain;
Q5M890	Apolipoprotein N OS=Rattus norvegicus OX=10116 GN=Apon PE=1 SV=1	0.827	Down	0.00015792	Apon	28.232	7.8	2	2	2	0.893	0.931	0.898	1.102	1.088	1.1	extracellular
P05544	Serine protease inhibitor A3L OS=Rattus norvegicus OX=10116 GN=Serpina3l PE=1 SV=3	0.763	Down	0.027344	Serpina3l	46.277	40.2	16	53	2	0.805	0.819	1.005	1.236	1.092	1.118	plasma membrane	GO:0052548 regulation of endopeptidase activity; GO:0050794 regulation of cellular process; GO:0010951 negative regulation of endopeptidase activity; GO:0045861 negative regulation of proteolysis; GO:0080090 regulation of primary metabolic process; GO:0060255 regulation of macromolecule metabolic process; GO:0048523 negative regulation of cellular process; GO:0048519 negative regulation of biolog…	GO:0005615 extracellular space; GO:0044421 extracellular region part; GO:0005576 extracellular region;	GO:0004867 serine-type endopeptidase inhibitor activity; GO:0030234 enzyme regulator activity; GO:0030414 peptidase inhibitor activity; GO:0061134 peptidase regulator activity; GO:0061135 endopeptidase regulator activity; GO:0098772 molecular function regulator; GO:0004857 enzyme inhibitor activity; GO:0004866 endopeptidase inhibitor activity;	K04525	SERPINA; serpin peptidase inhibitor, clade A		IPR023796;	Serpin domain;
Q9R1T1	Barrier-to-autointegration factor OS=Rattus norvegicus OX=10116 GN=Banf1 PE=1 SV=1	0.828	Down	0.0027597	Banf1	10.044	34.8	3	4	3	0.953	0.887	0.87	1.107	1.088	1.078	extracellular	GO:0015074 DNA integration; GO:0006725 cellular aromatic compound metabolic process; GO:0006259 DNA metabolic process; GO:1901360 organic cyclic compound metabolic process; GO:0006807 nitrogen compound metabolic process; GO:0044238 primary metabolic process; GO:0044237 cellular metabolic process; GO:0071704 organic substance metabolic process; GO:0008152 metabolic process; GO:0090304 nucleic acid…	GO:0043229 intracellular organelle; GO:0044421 extracellular region part; GO:0043232 intracellular non-membrane-bounded organelle; GO:0044446 intracellular organelle part; GO:0031982 vesicle; GO:0005737 cytoplasm; GO:0031981 nuclear lumen; GO:0044424 intracellular part; GO:0005623 cell; GO:0005829 cytosol; GO:0005576 extracellular region; GO:0044422 organelle part; GO:0043228 non-membrane-bounded…	GO:0097159 organic cyclic compound binding; GO:1901363 heterocyclic compound binding; GO:0003677 DNA binding; GO:0042802 identical protein binding; GO:0047485 protein N-terminus binding; GO:0097726 LEM domain binding; GO:0042803 protein homodimerization activity; GO:0005488 binding; GO:0046983 protein dimerization activity; GO:0003676 nucleic acid binding; GO:0008022 protein C-terminus binding; G…	K21870	BANF1; barrier-to-autointegration factor
F1LUD4	Uncharacterized protein OS=Rattus norvegicus OX=10116 PE=1 SV=3	1.221	Up	0.0121834	---	85.712	0.9	1	1	1	1.124	1.144	1.034	0.929	0.934	0.842	nucleus	GO:0044700 single organism signaling; GO:0010941 regulation of cell death; GO:0032270 positive regulation of cellular protein metabolic process; GO:0045321 leukocyte activation; GO:2000108 positive regulation of leukocyte apoptotic process; GO:0009605 response to external stimulus; GO:0031929 TOR signaling; GO:0010466 negative regulation of peptidase activity; GO:0044093 positive regulation of mo…	GO:0044424 intracellular part; GO:0005623 cell; GO:0044464 cell part; GO:0005622 intracellular; GO:0005737 cytoplasm;	GO:0098772 molecular function regulator; GO:0005085 guanyl-nucleotide exchange factor activity;	K20400	FNIP1; folliculin-interacting protein 1	rno04150 mTOR signaling pathway - Rattus norvegicus (rat);	IPR028085; IPR028086;	Folliculin-interacting protein, middle domain; Folliculin-interacting protein, C-terminal domain;
Q4QQU9	Osteoclastogenesis-associated transmembrane protein 1 OS=Rattus norvegicus OX=10116 GN=Ostm1 PE=1 SV=1	0.763	Down	0.0112158	Ostm1	37.909	3.3	1	1	1	0.929	0.788	0.89	1.219	1.082	1.115	extracellular	GO:0032502 developmental process; GO:0044707 single-multicellular organism process; GO:0030316 osteoclast differentiation; GO:0030099 myeloid cell differentiation; GO:0002521 leukocyte differentiation; GO:0048731 system development; GO:0048869 cellular developmental process; GO:0044763 single-organism cellular process; GO:0044699 single-organism process; GO:0002376 immune system process; GO:00025…	GO:0016020 membrane; GO:0044425 membrane part; GO:0044464 cell part; GO:0005622 intracellular; GO:0005737 cytoplasm; GO:0031224 intrinsic component of membrane; GO:0044424 intracellular part; GO:0005829 cytosol; GO:0005623 cell; GO:0016021 integral component of membrane; GO:0044444 cytoplasmic part;
A0A0H2UHF8	Alpha-1-acid glycoprotein OS=Rattus norvegicus OX=10116 GN=Orm1 PE=1 SV=1	0.732	Down	0.004664	Orm1	26.711	6.8	2	2	2	0.918	0.796	0.832	1.216	1.082	1.181	extracellular	GO:0002682 regulation of immune system process; GO:0050789 regulation of biological process; GO:0065007 biological regulation;	GO:0005615 extracellular space; GO:0044421 extracellular region part; GO:0005576 extracellular region;		K17308	ORM1, AGP1; alpha-1-acid glycoprotein 1		IPR000566; IPR012674; IPR011038;	Lipocalin/cytosolic fatty-acid binding domain; Calycin; Calycin-like;
Q5MYW4	Zinc finger protein 667 OS=Rattus norvegicus OX=10116 GN=Znf667 PE=2 SV=1	0.787	Down	0.0115243	Znf667	70.037	3	2	3	2	0.88	0.931	0.836	1.04	1.212	1.113	nucleus	GO:0050794 regulation of cellular process; GO:0006725 cellular aromatic compound metabolic process; GO:0097659 nucleic acid-templated transcription; GO:0060255 regulation of macromolecule metabolic process; GO:0019219 regulation of nucleobase-containing compound metabolic process; GO:0009058 biosynthetic process; GO:0044237 cellular metabolic process; GO:0071704 organic substance metabolic proces…	GO:0043226 organelle; GO:0043231 intracellular membrane-bounded organelle; GO:0043229 intracellular organelle; GO:0005634 nucleus; GO:0044464 cell part; GO:0005622 intracellular; GO:0044424 intracellular part; GO:0043227 membrane-bounded organelle; GO:0005623 cell;	GO:0097159 organic cyclic compound binding; GO:1901363 heterocyclic compound binding; GO:0003677 DNA binding; GO:0005488 binding; GO:0003676 nucleic acid binding; GO:0043167 ion binding; GO:0043169 cation binding; GO:0046872 metal ion binding;	K09228	KRAB; KRAB domain-containing zinc finger protein	rno05168 Herpes simplex virus 1 infection - Rattus norvegicus (rat);	IPR015880; IPR001909; IPR007087; IPR013087;	Zinc finger, C2H2-like; Krueppel-associated box; Zinc finger, C2H2; Zinc finger C2H2-type/integrase DNA-binding domain;
P53987	Monocarboxylate transporter 1 OS=Rattus norvegicus OX=10116 GN=Slc16a1 PE=1 SV=1	1.252	Up	0.027156	Slc16a1	53.238	2.6	1	1	1	0.988	1.128	1.218	0.916	0.85	0.897	plasma membrane	GO:0015850 organic hydroxy compound transport; GO:0065008 regulation of biological quality; GO:0042593 glucose homeostasis; GO:0050796 regulation of insulin secretion; GO:0023051 regulation of signaling; GO:0051780 behavioral response to nutrient; GO:0044699 single-organism process; GO:0051046 regulation of secretion; GO:0051234 establishment of localization; GO:0007610 behavior; GO:0009605 respo…	GO:0016020 membrane; GO:0044421 extracellular region part; GO:0071944 cell periphery; GO:0030054 cell junction; GO:0031982 vesicle; GO:0005737 cytoplasm; GO:0031224 intrinsic component of membrane; GO:0044424 intracellular part; GO:0005887 integral component of plasma membrane; GO:0005623 cell; GO:0044422 organelle part; GO:0043228 non-membrane-bounded organelle; GO:0005856 cytoskeleton; GO:00700…	GO:0005342 organic acid transmembrane transporter activity; GO:0022804 active transmembrane transporter activity; GO:0015291 secondary active transmembrane transporter activity; GO:0015075 ion transmembrane transporter activity; GO:0015293 symporter activity; GO:0046983 protein dimerization activity; GO:0022892 substrate-specific transporter activity; GO:1901618 organic hydroxy compound transmemb…	K08179	SLC16A1; MFS transporter, MCP family, solute carrier family 16 (monocarboxylic acid transporters), member 1		IPR020846;	Major facilitator superfamily domain;
Q5I0P2	Glycine cleavage system H protein, mitochondrial OS=Rattus norvegicus OX=10116 GN=Gcsh PE=2 SV=1	1.224	Up	3.8591e-05	Gcsh	18.485	46.5	5	10	5	1.09	1.092	1.096	0.876	0.897	0.906	mitochondria	GO:1901606 alpha-amino acid catabolic process; GO:0044712 single-organism catabolic process; GO:0044281 small molecule metabolic process; GO:0044763 single-organism cellular process; GO:0019464 glycine decarboxylation via glycine cleavage system; GO:0006807 nitrogen compound metabolic process; GO:0044699 single-organism process; GO:0044282 small molecule catabolic process; GO:0044238 primary meta…	GO:0043226 organelle; GO:0043231 intracellular membrane-bounded organelle; GO:0043229 intracellular organelle; GO:0005960 glycine cleavage complex; GO:1902494 catalytic complex; GO:0044464 cell part; GO:0005622 intracellular; GO:1990204 oxidoreductase complex; GO:0005737 cytoplasm; GO:0032991 macromolecular complex; GO:0044424 intracellular part; GO:0043227 membrane-bounded organelle; GO:0005623 …	GO:0008168 methyltransferase activity; GO:0003824 catalytic activity; GO:0005488 binding; GO:0016741 transferase activity, transferring one-carbon groups; GO:0005515 protein binding; GO:0004047 aminomethyltransferase activity; GO:0016740 transferase activity; GO:0019899 enzyme binding;	K02437	gcvH, GCSH; glycine cleavage system H protein	rno00260 Glycine, serine and threonine metabolism - Rattus norvegicus (rat); rno00630 Glyoxylate and dicarboxylate metabolism - Rattus norvegicus (rat); rno01100 Metabolic pathways - Rattus norvegicus (rat); rno01200 Carbon metabolism - Rattus norvegicus (rat);	IPR011053; IPR000089;	Single hybrid motif; Biotin/lipoyl attachment;
Q5PQP2	Receptor-binding cancer antigen expressed on SiSo cells OS=Rattus norvegicus OX=10116 GN=Ebag9 PE=1 SV=1	1.354	Up	0.0110249	Ebag9	24.187	12.2	2	2	2	1.182	1.123	1.154	0.764	0.829	0.961	mitochondria	GO:0044763 single-organism cellular process; GO:0044699 single-organism process; GO:0012501 programmed cell death; GO:0009987 cellular process; GO:0008219 cell death; GO:0006915 apoptotic process;	GO:0097708 intracellular vesicle; GO:0043229 intracellular organelle; GO:0016020 membrane; GO:0098588 bounding membrane of organelle; GO:0031090 organelle membrane; GO:0031410 cytoplasmic vesicle; GO:0044446 intracellular organelle part; GO:0005737 cytoplasm; GO:0031982 vesicle; GO:0000139 Golgi membrane; GO:0031224 intrinsic component of membrane; GO:0012505 endomembrane system; GO:0044424 intra…	GO:0005515 protein binding; GO:0005488 binding;	K22455	rno04915 Estrogen signaling pathway - Rattus norvegicus (rat);
G3V913	Heat shock 27kDa protein 1 OS=Rattus norvegicus OX=10116 GN=Hspb1 PE=1 SV=1	0.797	Down	0.04656	Hspb1	22.807	16	3	5	3	0.936	0.794	0.946	1.113	1.232	1.014	mitochondria	GO:0098840 protein transport along microtubule; GO:0044700 single organism signaling; GO:0007596 blood coagulation; GO:0065008 regulation of biological quality; GO:0010941 regulation of cell death; GO:0030335 positive regulation of cell migration; GO:0032680 regulation of tumor necrosis factor production; GO:0042108 positive regulation of cytokine biosynthetic process; GO:0007166 cell surface rec…	GO:0016020 membrane; GO:0005615 extracellular space; GO:0044421 extracellular region part; GO:0071944 cell periphery; GO:0030054 cell junction; GO:0030016 myofibril; GO:0099568 cytoplasmic region; GO:0031982 vesicle; GO:0005737 cytoplasm; GO:0032838 cell projection cytoplasm; GO:0099512 supramolecular fiber; GO:0044424 intracellular part; GO:0030018 Z disc; GO:0099080 supramolecular complex; GO:0…	GO:0030291 protein serine/threonine kinase inhibitor activity; GO:0003723 RNA binding; GO:0019901 protein kinase binding; GO:0004860 protein kinase inhibitor activity; GO:0008426 protein kinase C inhibitor activity; GO:0005515 protein binding; GO:0019207 kinase regulator activity; GO:0019887 protein kinase regulator activity; GO:0004857 enzyme inhibitor activity; GO:0098772 molecular function reg…	K04455	HSPB1; heat shock protein beta-1	rno04010 MAPK signaling pathway - Rattus norvegicus (rat); rno04370 VEGF signaling pathway - Rattus norvegicus (rat); rno05146 Amoebiasis - Rattus norvegicus (rat);	IPR002068; IPR008978;	Alpha crystallin/Hsp20 domain; HSP20-like chaperone;
P31430	Dipeptidase 1 OS=Rattus norvegicus OX=10116 GN=Dpep1 PE=2 SV=2	1.563	Up	0.00128466	Dpep1	45.522	4.9	2	2	2	1.318	1.168	1.183	0.765	0.738	0.844	extracellular	GO:0010941 regulation of cell death; GO:0044699 single-organism process; GO:0044237 cellular metabolic process; GO:0000096 sulfur amino acid metabolic process; GO:0040013 negative regulation of locomotion; GO:0010466 negative regulation of peptidase activity; GO:0008152 metabolic process; GO:0006520 cellular amino acid metabolic process; GO:0032879 regulation of localization; GO:0006915 apoptotic…	GO:0016020 membrane; GO:0005615 extracellular space; GO:0044421 extracellular region part; GO:0016324 apical plasma membrane; GO:0030054 cell junction; GO:0071944 cell periphery; GO:0031982 vesicle; GO:0031224 intrinsic component of membrane; GO:0044424 intracellular part; GO:0098858 actin-based cell projection; GO:0005623 cell; GO:0070062 extracellular exosome; GO:0098590 plasma membrane region;…	GO:0008233 peptidase activity; GO:0061134 peptidase regulator activity; GO:0043028 cysteine-type endopeptidase regulator activity involved in apoptotic process; GO:0008239 dipeptidyl-peptidase activity; GO:0016787 hydrolase activity; GO:0004857 enzyme inhibitor activity; GO:0098772 molecular function regulator; GO:0004869 cysteine-type endopeptidase inhibitor activity; GO:0003824 catalytic activi…	K01273	DPEP; membrane dipeptidase [EC:3.4.13.19]		IPR032466;	Metal-dependent hydrolase;
Q9R1N3	Sodium bicarbonate cotransporter 3 OS=Rattus norvegicus OX=10116 GN=Slc4a7 PE=1 SV=1	1.391	Up	0.0145755	Slc4a7	135.95	3.3	3	4	2	1.218	1.166	1.115	0.73	0.831	0.954	plasma membrane	GO:0065008 regulation of biological quality; GO:0060113 inner ear receptor cell differentiation; GO:0048869 cellular developmental process; GO:0048666 neuron development; GO:0030641 regulation of cellular pH; GO:0030004 cellular monovalent inorganic cation homeostasis; GO:0022008 neurogenesis; GO:0044699 single-organism process; GO:0051234 establishment of localization; GO:0035315 hair cell diffe…	GO:0016323 basolateral plasma membrane; GO:0016020 membrane; GO:0098862 cluster of actin-based cell projections; GO:0016324 apical plasma membrane; GO:0031410 cytoplasmic vesicle; GO:0071944 cell periphery; GO:0005737 cytoplasm; GO:0031982 vesicle; GO:0031224 intrinsic component of membrane; GO:0044424 intracellular part; GO:0005887 integral component of plasma membrane; GO:0098858 actin-based ce…	GO:0022804 active transmembrane transporter activity; GO:0015291 secondary active transmembrane transporter activity; GO:0005452 inorganic anion exchanger activity; GO:0015075 ion transmembrane transporter activity; GO:0015293 symporter activity; GO:0022892 substrate-specific transporter activity; GO:0015103 inorganic anion transmembrane transporter activity; GO:0008509 anion transmembrane transp…	K13858	SLC4A7, NBC3; solute carrier family 4 (sodium bicarbonate cotransporter), member 7		IPR011531; IPR013769; IPR016152;	Bicarbonate transporter, C-terminal; Band 3 cytoplasmic domain; Phosphotransferase/anion transporter;
D4A1B6	Abhydrolase domain-containing 13 OS=Rattus norvegicus OX=10116 GN=Abhd13 PE=1 SV=1	0.788	Down	0.039421	Abhd13	38.535	2.7	1	1	1	0.962	0.758	0.937	1.077	1.109	1.184	extracellular,plasma membrane		GO:0031224 intrinsic component of membrane; GO:0016020 membrane; GO:0016021 integral component of membrane; GO:0044425 membrane part;		K06889	K06889; uncharacterized protein		IPR029058; IPR022742;	Alpha/Beta hydrolase fold; Serine aminopeptidase, S33;
A0A0H2UHF9	Actin-binding LIM protein 2 OS=Rattus norvegicus OX=10116 GN=Ablim2 PE=1 SV=1	0.816	Down	0.046202	Ablim2	63.821	5.4	3	3	3	0.945	0.832	0.927	1.237	1.051	1.027	nucleus	GO:0016043 cellular component organization; GO:0006725 cellular aromatic compound metabolic process; GO:0097659 nucleic acid-templated transcription; GO:0044699 single-organism process; GO:0009058 biosynthetic process; GO:0044237 cellular metabolic process; GO:0071704 organic substance metabolic process; GO:0008152 metabolic process; GO:0030036 actin cytoskeleton organization; GO:0046483 heterocy…		GO:0008092 cytoskeletal protein binding; GO:0046914 transition metal ion binding; GO:0005488 binding; GO:0043167 ion binding; GO:0003779 actin binding; GO:0043169 cation binding; GO:0046872 metal ion binding; GO:0005515 protein binding; GO:0008270 zinc ion binding;	K07520	ABLIM; actin-binding LIM protein	rno04360 Axon guidance - Rattus norvegicus (rat);	IPR001781; IPR003128; IPR032402;	Zinc finger, LIM-type; Villin headpiece; Putative adherens-junction anchoring domain;
B2GV57	Cysteinyl-tRNA synthetase 2, mitochondrial OS=Rattus norvegicus OX=10116 GN=Cars2 PE=1 SV=1	0.533	Down	0.043343	Cars2	60.917	10.2	5	6	5	0.724	0.712	0.653	1.143	1.839	0.939	mitochondria	GO:0006518 peptide metabolic process; GO:0006725 cellular aromatic compound metabolic process; GO:0044267 cellular protein metabolic process; GO:0044699 single-organism process; GO:0009058 biosynthetic process; GO:0006423 cysteinyl-tRNA aminoacylation; GO:1901566 organonitrogen compound biosynthetic process; GO:0043039 tRNA aminoacylation; GO:0044237 cellular metabolic process; GO:0071704 organic…	GO:0044424 intracellular part; GO:0005623 cell; GO:0044464 cell part; GO:0005622 intracellular; GO:0005737 cytoplasm;	GO:0016876 ligase activity, forming aminoacyl-tRNA and related compounds; GO:0005524 ATP binding; GO:1901265 nucleoside phosphate binding; GO:0016875 ligase activity, forming carbon-oxygen bonds; GO:0001882 nucleoside binding; GO:0043167 ion binding; GO:0016874 ligase activity; GO:0000166 nucleotide binding; GO:0097159 organic cyclic compound binding; GO:1901363 heterocyclic compound binding; GO:…	K01883	CARS, cysS; cysteinyl-tRNA synthetase [EC:6.1.1.16]	rno00970 Aminoacyl-tRNA biosynthesis - Rattus norvegicus (rat);	IPR014729; IPR032678; IPR009080;	Rossmann-like alpha/beta/alpha sandwich fold; tRNA synthetases class I, catalytic domain; Aminoacyl-tRNA synthetase, class Ia, anticodon-binding;
A0A0G2JXV1	Coiled-coil domain-containing 196 OS=Rattus norvegicus OX=10116 GN=Ccdc196 PE=4 SV=1	2.971	Up	0.00053867	Ccdc196	19.459	4.7	1	1	1	1.612	1.571	1.306	0.592	0.451	0.468	nucleus
M0R629	Adenylosuccinate synthetase isozyme 1 OS=Rattus norvegicus OX=10116 GN=Adssl1 PE=1 SV=1	1.21	Up	0.00022345	Adssl1	50.25	51.2	19	35	17	1.085	1.106	1.09	0.899	0.885	0.928	cytoplasm	GO:0009116 nucleoside metabolic process; GO:0042278 purine nucleoside metabolic process; GO:0009167 purine ribonucleoside monophosphate metabolic process; GO:0009117 nucleotide metabolic process; GO:0044699 single-organism process; GO:0009163 nucleoside biosynthetic process; GO:0046129 purine ribonucleoside biosynthetic process; GO:0009058 biosynthetic process; GO:0009156 ribonucleoside monophosp…	GO:0044424 intracellular part; GO:0005623 cell; GO:0044464 cell part; GO:0005622 intracellular; GO:0005737 cytoplasm;	GO:0051015 actin filament binding; GO:1901265 nucleoside phosphate binding; GO:0046983 protein dimerization activity; GO:0016874 ligase activity; GO:0016817 hydrolase activity, acting on acid anhydrides; GO:0016787 hydrolase activity; GO:0005515 protein binding; GO:1901363 heterocyclic compound binding; GO:0097159 organic cyclic compound binding; GO:0016462 pyrophosphatase activity; GO:0042802 id…	K01939	purA, ADSS; adenylosuccinate synthase [EC:6.3.4.4]	rno00230 Purine metabolism - Rattus norvegicus (rat); rno00250 Alanine, aspartate and glutamate metabolism - Rattus norvegicus (rat); rno01100 Metabolic pathways - Rattus norvegicus (rat);	IPR027417;	P-loop containing nucleoside triphosphate hydrolase;
A0A0G2K9M4	WD repeat and FYVE domain-containing 3 OS=Rattus norvegicus OX=10116 GN=Wdfy3 PE=1 SV=1	1.343	Up	0.033624	Wdfy3	391.57	0.5	1	2	1	1.094	1.293	1.052	0.803	0.784	0.973	nucleus	GO:0008152 metabolic process; GO:0035973 aggrephagy; GO:0044248 cellular catabolic process; GO:0006914 autophagy; GO:0009987 cellular process; GO:0009056 catabolic process; GO:0044237 cellular metabolic process; GO:0016236 macroautophagy;	GO:0016020 membrane; GO:0031090 organelle membrane; GO:0019898 extrinsic component of membrane; GO:0071944 cell periphery; GO:0005737 cytoplasm; GO:0032991 macromolecular complex; GO:0044424 intracellular part; GO:0016604 nuclear body; GO:0005623 cell; GO:0044422 organelle part; GO:0005776 autophagosome; GO:0043228 non-membrane-bounded organelle; GO:0031974 membrane-enclosed lumen; GO:1902494 cat…	GO:0005545 1-phosphatidylinositol binding; GO:0016758 transferase activity, transferring hexosyl groups; GO:0008378 galactosyltransferase activity; GO:0043167 ion binding; GO:0008194 UDP-glycosyltransferase activity; GO:0005515 protein binding; GO:0003831 beta-N-acetylglucosaminylglycopeptide beta-1,4-galactosyltransferase activity; GO:0035250 UDP-galactosyltransferase activity; GO:0003824 cataly…	K22262	WDFY3, ALFY; WD repeat and FYVE domain-containing protein 3		IPR000409; IPR013320; IPR031570; IPR000306; IPR017455; IPR017986; IPR011993; IPR016024; IPR011011; IPR023362;	BEACH domain; Concanavalin A-like lectin/glucanase domain; Domain of unknown function DUF4704; FYVE zinc finger; Zinc finger, FYVE-related; WD40-repeat-containing domain; PH domain-like; Armadillo-type fold; Zinc finger, FYVE/PHD-type; PH-BEACH domain;
A0A0G2JT03	BBSome-interacting protein 1 OS=Rattus norvegicus OX=10116 GN=Bbip1 PE=4 SV=1	0.678	Down	0.0051783	Bbip1	7.776	14.9	1	1	1	0.83	0.771	0.829	1.303	1.234	1.049	cytoplasm	GO:0044085 cellular component biogenesis; GO:0016043 cellular component organization; GO:0097499 protein localization to non-motile cilium; GO:0072657 protein localization to membrane; GO:0061512 protein localization to cilium; GO:0044763 single-organism cellular process; GO:0060271 cilium assembly; GO:0044699 single-organism process; GO:0030031 cell projection assembly; GO:0044782 cilium organiz…	GO:0043226 organelle; GO:0005929 cilium; GO:0042995 cell projection; GO:0044441 ciliary part; GO:0034464 BBSome; GO:0044464 cell part; GO:0032991 macromolecular complex; GO:0043234 protein complex; GO:0044463 cell projection part; GO:0005623 cell; GO:0044422 organelle part;		K19399	BBIP1; BBSome-interacting protein 1
B5DFJ2	Fam3a protein OS=Rattus norvegicus OX=10116 GN=Fam3a PE=1 SV=1	0.752	Down	0.0176356	Fam3a	25.15	32.6	6	7	5	0.913	0.857	0.815	1.143	1.02	1.276	extracellular		GO:0031224 intrinsic component of membrane; GO:0016020 membrane; GO:0016021 integral component of membrane; GO:0044425 membrane part;
A0A096MJR6	Poly [ADP-ribose] polymerase (Fragment) OS=Rattus norvegicus OX=10116 PE=1 SV=1	1.261	Up	0.042616	---	89.891	7	6	8	6	0.983	1.147	1.203	0.873	0.81	0.961	mitochondria	GO:0006486 protein glycosylation; GO:0043413 macromolecule glycosylation; GO:0009101 glycoprotein biosynthetic process; GO:0044763 single-organism cellular process; GO:0044267 cellular protein metabolic process; GO:0009100 glycoprotein metabolic process; GO:0044699 single-organism process; GO:0009058 biosynthetic process; GO:0044238 primary metabolic process; GO:0044237 cellular metabolic process…		GO:0016763 transferase activity, transferring pentosyl groups; GO:0016757 transferase activity, transferring glycosyl groups; GO:0003950 NAD+ ADP-ribosyltransferase activity; GO:0003824 catalytic activity; GO:0016740 transferase activity;	K10798	PARP; poly [ADP-ribose] polymerase [EC:2.4.2.30]	rno03410 Base excision repair - Rattus norvegicus (rat); rno04210 Apoptosis - Rattus norvegicus (rat); rno04217 Necroptosis - Rattus norvegicus (rat);	IPR004102; IPR013694; IPR012317; IPR001357;	Poly(ADP-ribose) polymerase, regulatory domain; VIT domain; Poly(ADP-ribose) polymerase, catalytic domain; BRCT domain;
Q6P6S2	Zinc transporter ZIP11 OS=Rattus norvegicus OX=10116 GN=Slc39a11 PE=2 SV=1	1.201	Up	0.027543	Slc39a11	34.868	5.4	2	2	2	1.002	1.146	1.124	0.898	0.966	0.86	plasma membrane	GO:0098655 cation transmembrane transport; GO:0034220 ion transmembrane transport; GO:0072511 divalent inorganic cation transport; GO:0098660 inorganic ion transmembrane transport; GO:0006829 zinc II ion transport; GO:0030001 metal ion transport; GO:0071577 zinc II ion transmembrane transport; GO:0051234 establishment of localization; GO:0006810 transport; GO:0055085 transmembrane transport; GO:0…	GO:0043229 intracellular organelle; GO:0016020 membrane; GO:0071944 cell periphery; GO:0005737 cytoplasm; GO:0031224 intrinsic component of membrane; GO:0012505 endomembrane system; GO:0044424 intracellular part; GO:0005623 cell; GO:0016021 integral component of membrane; GO:0005886 plasma membrane; GO:0043231 intracellular membrane-bounded organelle; GO:0043226 organelle; GO:0005634 nucleus; GO:…	GO:0046873 metal ion transmembrane transporter activity; GO:0072509 divalent inorganic cation transmembrane transporter activity; GO:0015075 ion transmembrane transporter activity; GO:0005385 zinc ion transmembrane transporter activity; GO:0046915 transition metal ion transmembrane transporter activity; GO:0022892 substrate-specific transporter activity; GO:0022890 inorganic cation transmembrane …	K14717	SLC39A11, ZIP11; solute carrier family 39 (zinc transporter), member 11
A0A0G2K9Q0	TBC1 domain-containing kinase OS=Rattus norvegicus OX=10116 GN=Tbck PE=1 SV=1	0.797	Down	0.0030552	Tbck	100.66	4.5	3	3	3	0.886	0.929	0.852	1.067	1.164	1.116	cytoplasm	GO:0060627 regulation of vesicle-mediated transport; GO:0023051 regulation of signaling; GO:0044699 single-organism process; GO:0031338 regulation of vesicle fusion; GO:0044237 cellular metabolic process; GO:0015031 protein transport; GO:0006796 phosphate-containing compound metabolic process; GO:0051234 establishment of localization; GO:0008152 metabolic process; GO:0030036 actin cytoskeleton or…	GO:0043229 intracellular organelle; GO:0043232 intracellular non-membrane-bounded organelle; GO:0044430 cytoskeletal part; GO:0044446 intracellular organelle part; GO:0005737 cytoplasm; GO:0030496 midbody; GO:0012505 endomembrane system; GO:0044424 intracellular part; GO:0005623 cell; GO:0005819 spindle; GO:0044422 organelle part; GO:0043228 non-membrane-bounded organelle; GO:0005856 cytoskeleton…	GO:1901265 nucleoside phosphate binding; GO:0016773 phosphotransferase activity, alcohol group as acceptor; GO:0060589 nucleoside-triphosphatase regulator activity; GO:0030695 GTPase regulator activity; GO:0005515 protein binding; GO:0004672 protein kinase activity; GO:0098772 molecular function regulator; GO:0017137 Rab GTPase binding; GO:0097159 organic cyclic compound binding; GO:1901363 heter…	K17544	TBCK; TBC domain-containing protein kinase-like protein		IPR001763; IPR000719; IPR000195; IPR011009;	Rhodanese-like domain; Protein kinase domain; Rab-GTPase-TBC domain; Protein kinase-like domain;
Q6AY46	tRNA (adenine(58)-N(1))-methyltransferase catalytic subunit TRMT61A OS=Rattus norvegicus OX=10116 GN=Trmt61a PE=2 SV=1	0.645	Down	0.044398	Trmt61a	31.618	19.3	3	3	3	0.93	0.705	0.73	0.966	1.467	1.234	nucleus	GO:0006396 RNA processing; GO:0034470 ncRNA processing; GO:0006725 cellular aromatic compound metabolic process; GO:1901360 organic cyclic compound metabolic process; GO:0006807 nitrogen compound metabolic process; GO:0044238 primary metabolic process; GO:0044237 cellular metabolic process; GO:0009451 RNA modification; GO:0032259 methylation; GO:0071704 organic substance metabolic process; GO:001…	GO:0043229 intracellular organelle; GO:0005737 cytoplasm; GO:0032991 macromolecular complex; GO:0044424 intracellular part; GO:0043527 tRNA methyltransferase complex; GO:1990234 transferase complex; GO:0005623 cell; GO:0034708 methyltransferase complex; GO:0043231 intracellular membrane-bounded organelle; GO:0043226 organelle; GO:0005634 nucleus; GO:1902494 catalytic complex; GO:0005622 intracell…	GO:0016426 tRNA (adenine) methyltransferase activity; GO:0008757 S-adenosylmethionine-dependent methyltransferase activity; GO:0008168 methyltransferase activity; GO:0008173 RNA methyltransferase activity; GO:0003824 catalytic activity; GO:0016741 transferase activity, transferring one-carbon groups; GO:0008175 tRNA methyltransferase activity; GO:0016740 transferase activity; GO:0016429 tRNA (ade…	K07442	TRM61, GCD14; tRNA (adenine57-N1/adenine58-N1)-methyltransferase catalytic subunit [EC:2.1.1.219 2.1.1.220]		IPR029063;	S-adenosyl-L-methionine-dependent methyltransferase;
P08721	Osteopontin OS=Rattus norvegicus OX=10116 GN=Spp1 PE=1 SV=2	0.767	Down	0.025516	Spp1	34.963	17	4	5	4	0.809	0.776	0.98	1.054	1.166	1.125	extracellular	GO:0051093 negative regulation of developmental process; GO:0001649 osteoblast differentiation; GO:0065008 regulation of biological quality; GO:0048640 negative regulation of developmental growth; GO:0051129 negative regulation of cellular component organization; GO:0048869 cellular developmental process; GO:0022008 neurogenesis; GO:0051241 negative regulation of multicellular organismal process;…	GO:0043229 intracellular organelle; GO:0005615 extracellular space; GO:0044421 extracellular region part; GO:0042995 cell projection; GO:0005737 cytoplasm; GO:0031982 vesicle; GO:0012505 endomembrane system; GO:0044424 intracellular part; GO:0005623 cell; GO:0005576 extracellular region; GO:0043231 intracellular membrane-bounded organelle; GO:0043226 organelle; GO:0070062 extracellular exosome; G…	GO:0005125 cytokine activity; GO:0005515 protein binding; GO:0005102 receptor binding; GO:0050840 extracellular matrix binding; GO:0005488 binding;	K06250	SPP1, BNSP, OPN; secreted phosphoprotein 1	rno04151 PI3K-Akt signaling pathway - Rattus norvegicus (rat); rno04371 Apelin signaling pathway - Rattus norvegicus (rat); rno04510 Focal adhesion - Rattus norvegicus (rat); rno04512 ECM-receptor interaction - Rattus norvegicus (rat); rno04620 Toll-like receptor signaling pathway - Rattus norvegicus (rat); rno05165 Human papillomavirus infection - Rattus norvegicus (rat);
A0A0G2JW36	UDP-glucose 4-epimerase OS=Rattus norvegicus OX=10116 GN=Gale PE=1 SV=1	1.241	Up	0.0147581	Gale	37.944	19.4	4	6	4	1.032	1.197	1.04	0.854	0.868	0.912	cytoskeleton	GO:0044723 single-organism carbohydrate metabolic process; GO:0008152 metabolic process; GO:0044710 single-organism metabolic process; GO:0044281 small molecule metabolic process; GO:0005996 monosaccharide metabolic process; GO:0044699 single-organism process; GO:0044238 primary metabolic process; GO:0005975 carbohydrate metabolic process; GO:0006012 galactose metabolic process; GO:0019318 hexose…		GO:0016853 isomerase activity; GO:0016857 racemase and epimerase activity, acting on carbohydrates and derivatives; GO:0016854 racemase and epimerase activity; GO:0003824 catalytic activity; GO:0003978 UDP-glucose 4-epimerase activity;	K01784	galE, GALE; UDP-glucose 4-epimerase [EC:5.1.3.2]	rno00052 Galactose metabolism - Rattus norvegicus (rat); rno00520 Amino sugar and nucleotide sugar metabolism - Rattus norvegicus (rat); rno01100 Metabolic pathways - Rattus norvegicus (rat);	IPR016040;	NAD(P)-binding domain;
P07171	Calbindin OS=Rattus norvegicus OX=10116 GN=Calb1 PE=1 SV=2	1.351	Up	0.0093167	Calb1	29.994	26.4	6	6	5	1.03	1.251	1.165	0.803	0.865	0.882	cytoplasm	GO:1900271 regulation of long-term synaptic potentiation; GO:0072025 distal convoluted tubule development; GO:0065008 regulation of biological quality; GO:0072503 cellular divalent inorganic cation homeostasis; GO:0072080 nephron tubule development; GO:0060042 retina morphogenesis in camera-type eye; GO:0010842 retina layer formation; GO:0023051 regulation of signaling; GO:0072205 metanephric col…	GO:0030425 dendrite; GO:0044421 extracellular region part; GO:0031982 vesicle; GO:0005737 cytoplasm; GO:0043025 neuronal cell body; GO:0044424 intracellular part; GO:0005623 cell; GO:0043679 axon terminus; GO:0043197 dendritic spine; GO:0070062 extracellular exosome; GO:0044309 neuron spine; GO:0098793 presynapse; GO:0044464 cell part; GO:0005622 intracellular; GO:1903561 extracellular vesicle; G…	GO:0097159 organic cyclic compound binding; GO:0099534 calcium ion binding involved in regulation of presynaptic cytosolic calcium ion concentration; GO:0099510 calcium ion binding involved in regulation of cytosolic calcium ion concentration; GO:0019842 vitamin binding; GO:0046914 transition metal ion binding; GO:0005488 binding; GO:0043167 ion binding; GO:0008289 lipid binding; GO:0005499 vitam…	K14757	CALB1, CALB; calbindin D28	rno04961 Endocrine and other factor-regulated calcium reabsorption - Rattus norvegicus (rat);	IPR002048; IPR011992;	EF-hand domain; EF-hand domain pair;
Q5FVJ5	bMERB domain-containing protein 1 OS=Rattus norvegicus OX=10116 GN=Bmerb1 PE=2 SV=1	0.81	Down	0.029536	Bmerb1	23.42	10.3	2	2	2	0.962	0.912	0.82	1.175	1.018	1.133	cytoplasm	GO:0051093 negative regulation of developmental process; GO:1903975 regulation of glial cell migration; GO:0014013 regulation of gliogenesis; GO:0051674 localization of cell; GO:0031111 negative regulation of microtubule polymerization or depolymerization; GO:0007420 brain development; GO:0051129 negative regulation of cellular component organization; GO:0048869 cellular developmental process; GO…	GO:0043226 organelle; GO:0005856 cytoskeleton; GO:0043229 intracellular organelle; GO:0015630 microtubule cytoskeleton; GO:0043232 intracellular non-membrane-bounded organelle; GO:0044464 cell part; GO:0005622 intracellular; GO:0044424 intracellular part; GO:0005623 cell; GO:0043228 non-membrane-bounded organelle;					IPR022735;	Domain of unknown function DUF3585;
Q6AYT0	Quinone oxidoreductase OS=Rattus norvegicus OX=10116 GN=Cryz PE=2 SV=1	0.705	Down	0.028224	Cryz	34.975	28	7	7	7	0.787	0.88	0.833	0.969	1.249	1.326	cytoplasm	GO:0044085 cellular component biogenesis; GO:0071466 cellular response to xenobiotic stimulus; GO:0016043 cellular component organization; GO:0051716 cellular response to stimulus; GO:0071822 protein complex subunit organization; GO:0051260 protein homooligomerization; GO:0055114 oxidation-reduction process; GO:0044699 single-organism process; GO:0050896 response to stimulus; GO:0044237 cellular …	GO:0070062 extracellular exosome; GO:0043226 organelle; GO:0044421 extracellular region part; GO:0044464 cell part; GO:0005622 intracellular; GO:0005737 cytoplasm; GO:0031982 vesicle; GO:1903561 extracellular vesicle; GO:0044424 intracellular part; GO:0005829 cytosol; GO:0005623 cell; GO:0043227 membrane-bounded organelle; GO:0005576 extracellular region; GO:0043230 extracellular organelle; GO:00…	GO:0016651 oxidoreductase activity, acting on NAD(P)H; GO:0003723 RNA binding; GO:1901265 nucleoside phosphate binding; GO:0003730 mRNA 3'-UTR binding; GO:0070402 NADPH binding; GO:0043167 ion binding; GO:0000166 nucleotide binding; GO:0008270 zinc ion binding; GO:0048037 cofactor binding; GO:0016655 oxidoreductase activity, acting on NAD(P)H, quinone or similar compound as acceptor; GO:0016491 o…	K00344	qor, CRYZ; NADPH2:quinone reductase [EC:1.6.5.5]		IPR011032; IPR020843; IPR016040; IPR013154; IPR013149;	GroES-like; Polyketide synthase, enoylreductase domain; NAD(P)-binding domain; Alcohol dehydrogenase, N-terminal; Alcohol dehydrogenase, C-terminal;
G3V7I2	Raftlin lipid raft linker 1 OS=Rattus norvegicus OX=10116 GN=Rftn1 PE=1 SV=1	0.799	Down	0.0142785	Rftn1	61.283	1.4	1	1	1	0.941	0.921	0.811	1.056	1.163	1.126	nucleus	GO:0050658 RNA transport; GO:0044700 single organism signaling; GO:0044085 cellular component biogenesis; GO:0007166 cell surface receptor signaling pathway; GO:0044699 single-organism process; GO:0051668 localization within membrane; GO:0031347 regulation of defense response; GO:0015031 protein transport; GO:0051234 establishment of localization; GO:0007165 signal transduction; GO:0051649 establ…	GO:0097708 intracellular vesicle; GO:0043229 intracellular organelle; GO:0016020 membrane; GO:0044421 extracellular region part; GO:0031410 cytoplasmic vesicle; GO:0098857 membrane microdomain; GO:0071944 cell periphery; GO:0031982 vesicle; GO:0005737 cytoplasm; GO:0032991 macromolecular complex; GO:0012505 endomembrane system; GO:0044424 intracellular part; GO:0005623 cell; GO:0005576 extracellu…	GO:0097159 organic cyclic compound binding; GO:1901363 heterocyclic compound binding; GO:0003723 RNA binding; GO:0003725 double-stranded RNA binding; GO:0005488 binding; GO:0003676 nucleic acid binding;
F1LSW7	60S ribosomal protein L14 OS=Rattus norvegicus OX=10116 GN=Rpl14 PE=1 SV=2	0.747	Down	0.018141	Rpl14	23.322	28	6	15	6	0.991	0.8	0.802	1.224	1.109	1.14	mitochondria	GO:0006518 peptide metabolic process; GO:0043043 peptide biosynthetic process; GO:0044267 cellular protein metabolic process; GO:0006807 nitrogen compound metabolic process; GO:0009058 biosynthetic process; GO:0043603 cellular amide metabolic process; GO:0044238 primary metabolic process; GO:1901566 organonitrogen compound biosynthetic process; GO:1901576 organic substance biosynthetic process; G…	GO:0005840 ribosome; GO:0043226 organelle; GO:0043229 intracellular organelle; GO:0043232 intracellular non-membrane-bounded organelle; GO:0044464 cell part; GO:0005622 intracellular; GO:0005737 cytoplasm; GO:0032991 macromolecular complex; GO:0044424 intracellular part; GO:1990904 ribonucleoprotein complex; GO:0005623 cell; GO:0030529 intracellular ribonucleoprotein complex; GO:0044444 cytoplasm…	GO:0003735 structural constituent of ribosome; GO:0005198 structural molecule activity;	K02875	RP-L14e, RPL14; large subunit ribosomal protein L14e	rno03010 Ribosome - Rattus norvegicus (rat);	IPR008991; IPR002784; IPR014722;	Translation protein SH3-like domain; Ribosomal protein L14e domain; Ribosomal protein L2 domain 2;
P19939	Apolipoprotein C-I OS=Rattus norvegicus OX=10116 GN=Apoc1 PE=3 SV=1	0.802	Down	0.033784	Apoc1	9.8606	28.4	3	4	3	0.985	0.806	0.908	1.141	1.039	1.184	extracellular	GO:0006869 lipid transport; GO:0051049 regulation of transport; GO:0032368 regulation of lipid transport; GO:0044699 single-organism process; GO:0010876 lipid localization; GO:0071702 organic substance transport; GO:0044238 primary metabolic process; GO:0042157 lipoprotein metabolic process; GO:0071704 organic substance metabolic process; GO:0051234 establishment of localization; GO:0006810 trans…	GO:0044421 extracellular region part; GO:0005615 extracellular space; GO:0032994 protein-lipid complex; GO:1990777 lipoprotein particle; GO:0034358 plasma lipoprotein particle; GO:0034385 triglyceride-rich plasma lipoprotein particle; GO:0032991 macromolecular complex; GO:0034364 high-density lipoprotein particle; GO:0005576 extracellular region; GO:0034361 very-low-density lipoprotein particle;		K22286	APOC1; apolipoprotein C-I	rno04979 Cholesterol metabolism - Rattus norvegicus (rat);
F1LN88	Aldehyde dehydrogenase, mitochondrial OS=Rattus norvegicus OX=10116 GN=Aldh2 PE=1 SV=2	0.828	Down	0.0187812	Aldh2	56.516	41.2	18	42	1	0.837	0.913	0.971	1.061	1.076	1.151	mitochondria	GO:0044699 single-organism process; GO:0008152 metabolic process; GO:0055114 oxidation-reduction process; GO:0044710 single-organism metabolic process;	GO:0043226 organelle; GO:0043231 intracellular membrane-bounded organelle; GO:0043229 intracellular organelle; GO:0044464 cell part; GO:0005622 intracellular; GO:0005737 cytoplasm; GO:0044424 intracellular part; GO:0043227 membrane-bounded organelle; GO:0005623 cell; GO:0005739 mitochondrion; GO:0044444 cytoplasmic part;	GO:0016620 oxidoreductase activity, acting on the aldehyde or oxo group of donors, NAD or NADP as acceptor; GO:0003824 catalytic activity; GO:0016491 oxidoreductase activity; GO:0016903 oxidoreductase activity, acting on the aldehyde or oxo group of donors;	K00128	ALDH; aldehyde dehydrogenase (NAD+) [EC:1.2.1.3]	rno00010 Glycolysis / Gluconeogenesis - Rattus norvegicus (rat); rno00053 Ascorbate and aldarate metabolism - Rattus norvegicus (rat); rno00071 Fatty acid degradation - Rattus norvegicus (rat); rno00280 Valine, leucine and isoleucine degradation - Rattus norvegicus (rat); rno00310 Lysine degradation - Rattus norvegicus (rat); rno00330 Arginine and proline metabolism - Rattus norvegicus (rat); rno…	IPR016161; IPR015590; IPR016162; IPR016163;	Aldehyde/histidinol dehydrogenase; Aldehyde dehydrogenase domain; Aldehyde dehydrogenase N-terminal domain; Aldehyde dehydrogenase, C-terminal;
Q9Z1J7	Amino acid transporter OS=Rattus norvegicus OX=10116 GN=Slc1a5 PE=1 SV=1	1.214	Up	0.0030957	Slc1a5	56.755	2.2	1	1	1	1.065	1.081	1.147	0.941	0.886	0.885	plasma membrane	GO:0032329 serine transport; GO:0034220 ion transmembrane transport; GO:0015807 L-amino acid transport; GO:0044699 single-organism process; GO:0071702 organic substance transport; GO:0003333 amino acid transmembrane transport; GO:0046942 carboxylic acid transport; GO:0015849 organic acid transport; GO:0098656 anion transmembrane transport; GO:0051234 establishment of localization; GO:0006810 tran…	GO:0031224 intrinsic component of membrane; GO:0016020 membrane; GO:0005576 extracellular region; GO:0016021 integral component of membrane; GO:0044425 membrane part;	GO:0005342 organic acid transmembrane transporter activity; GO:0022804 active transmembrane transporter activity; GO:0015291 secondary active transmembrane transporter activity; GO:0016597 amino acid binding; GO:0015179 L-amino acid transmembrane transporter activity; GO:0015075 ion transmembrane transporter activity; GO:1905361 L-serine transporter activity; GO:0015293 symporter activity; GO:004…	K05616	SLC1A5; solute carrier family 1 (neutral amino acid transporter), member 5	rno04974 Protein digestion and absorption - Rattus norvegicus (rat); rno05230 Central carbon metabolism in cancer - Rattus norvegicus (rat);
D3ZBN0	Histone H1.5 OS=Rattus norvegicus OX=10116 GN=Hist1h1b PE=1 SV=1	0.786	Down	0.014835	Hist1h1b	22.649	25.7	6	13	4	0.965	0.89	0.798	1.121	1.169	1.084	nucleus	GO:0044085 cellular component biogenesis; GO:0065008 regulation of biological quality; GO:0032270 positive regulation of cellular protein metabolic process; GO:0072594 establishment of protein localization to organelle; GO:0051253 negative regulation of RNA metabolic process; GO:0051234 establishment of localization; GO:0045927 positive regulation of growth; GO:1905269 positive regulation of chro…	GO:0044421 extracellular region part; GO:0031982 vesicle; GO:0032991 macromolecular complex; GO:0044424 intracellular part; GO:0005623 cell; GO:0000792 heterochromatin; GO:0044422 organelle part; GO:0044427 chromosomal part; GO:0043228 non-membrane-bounded organelle; GO:0070062 extracellular exosome; GO:0031974 membrane-enclosed lumen; GO:0070013 intracellular organelle lumen; GO:0044454 nuclear …	GO:0097159 organic cyclic compound binding; GO:1901363 heterocyclic compound binding; GO:0003677 DNA binding; GO:0003723 RNA binding; GO:0042826 histone deacetylase binding; GO:0031490 chromatin DNA binding; GO:0005488 binding; GO:0003676 nucleic acid binding; GO:0005515 protein binding; GO:0003682 chromatin binding; GO:0019899 enzyme binding;	K11275	H1_5; histone H1/5		IPR011991; IPR005818;	Winged helix-turn-helix DNA-binding domain; Linker histone H1/H5, domain H15;
P20762	Ig gamma-2C chain C region OS=Rattus norvegicus OX=10116 PE=2 SV=1	0.801	Down	0.0115402	---	36.571	27.1	6	13	4	0.949	0.879	0.861	1.121	1.04	1.196	extracellular			GO:0005515 protein binding; GO:0003823 antigen binding; GO:0005488 binding;	K06752	MHC2; major histocompatibility complex, class II	rno04145 Phagosome - Rattus norvegicus (rat); rno04514 Cell adhesion molecules (CAMs) - Rattus norvegicus (rat); rno04612 Antigen processing and presentation - Rattus norvegicus (rat); rno04640 Hematopoietic cell lineage - Rattus norvegicus (rat); rno04658 Th1 and Th2 cell differentiation - Rattus norvegicus (rat); rno04659 Th17 cell differentiation - Rattus norvegicus (rat); rno04672 Intestinal …	IPR007110; IPR013783; IPR003597;	Immunoglobulin-like domain; Immunoglobulin-like fold; Immunoglobulin C1-set;
P01244	Somatotropin OS=Rattus norvegicus OX=10116 GN=Gh1 PE=1 SV=1	0.822	Down	0.028958	Gh1	24.656	67.1	21	666	21	0.978	0.855	0.86	1.18	1.05	1.047	extracellular	GO:0065008 regulation of biological quality; GO:0071469 cellular response to alkaline pH; GO:0010941 regulation of cell death; GO:0022414 reproductive process; GO:0030323 respiratory tube development; GO:0090030 regulation of steroid hormone biosynthetic process; GO:0048869 cellular developmental process; GO:0009891 positive regulation of biosynthetic process; GO:0044699 single-organism process; …	GO:0016020 membrane; GO:0005615 extracellular space; GO:0044421 extracellular region part; GO:0031410 cytoplasmic vesicle; GO:0071944 cell periphery; GO:0031982 vesicle; GO:0005737 cytoplasm; GO:0044424 intracellular part; GO:0005623 cell; GO:0044422 organelle part; GO:0005622 intracellular; GO:0044464 cell part; GO:0099503 secretory vesicle; GO:0098791 Golgi subcompartment; GO:0044431 Golgi appa…	GO:0005131 growth hormone receptor binding; GO:0005102 receptor binding; GO:0005488 binding; GO:0043167 ion binding; GO:0005179 hormone activity; GO:0005126 cytokine receptor binding; GO:0046872 metal ion binding; GO:0043169 cation binding; GO:0005515 protein binding; GO:0051427 hormone receptor binding;	K05438	GH; growth hormone	rno04060 Cytokine-cytokine receptor interaction - Rattus norvegicus (rat); rno04080 Neuroactive ligand-receptor interaction - Rattus norvegicus (rat); rno04151 PI3K-Akt signaling pathway - Rattus norvegicus (rat); rno04630 JAK-STAT signaling pathway - Rattus norvegicus (rat);	IPR009079; IPR012351;	Four-helical cytokine-like, core; Four-helical cytokine, core;
O70280	WAP four-disulfide core domain protein 1 OS=Rattus norvegicus OX=10116 GN=Wfdc1 PE=1 SV=1	0.801	Down	0.032761	Wfdc1	23.23	14.2	3	9	3	1.008	0.827	0.832	1.093	1.168	1.068	extracellular	GO:0050794 regulation of cellular process; GO:0010951 negative regulation of endopeptidase activity; GO:0040008 regulation of growth; GO:0042127 regulation of cell proliferation; GO:0050728 negative regulation of inflammatory response; GO:0060255 regulation of macromolecule metabolic process; GO:1901700 response to oxygen-containing compound; GO:0032355 response to estradiol; GO:0080134 regulatio…	GO:0005615 extracellular space; GO:0044421 extracellular region part; GO:0005576 extracellular region;	GO:0004867 serine-type endopeptidase inhibitor activity; GO:0030234 enzyme regulator activity; GO:0030414 peptidase inhibitor activity; GO:0061134 peptidase regulator activity; GO:0061135 endopeptidase regulator activity; GO:0098772 molecular function regulator; GO:0004857 enzyme inhibitor activity; GO:0004866 endopeptidase inhibitor activity;				IPR008197;	WAP-type 'four-disulfide core' domain;
B0B1T9	Putative alpha7-nAChR chaperone OS=Rattus norvegicus OX=10116 GN=Ric3 PE=2 SV=1	1.231	Up	0.020257	Ric3	40.352	5.7	2	3	2	1.196	1.025	1.099	0.952	0.85	0.896	extracellular	GO:0044085 cellular component biogenesis; GO:0044700 single organism signaling; GO:0016043 cellular component organization; GO:0065008 regulation of biological quality; GO:0072503 cellular divalent inorganic cation homeostasis; GO:0030003 cellular cation homeostasis; GO:0051480 regulation of cytosolic calcium ion concentration; GO:0044699 single-organism process; GO:0055082 cellular chemical home…	GO:0016020 membrane; GO:0043229 intracellular organelle; GO:0042995 cell projection; GO:0005783 endoplasmic reticulum; GO:0005737 cytoplasm; GO:0043025 neuronal cell body; GO:0031224 intrinsic component of membrane; GO:0012505 endomembrane system; GO:0044424 intracellular part; GO:0005623 cell; GO:0016021 integral component of membrane; GO:0043226 organelle; GO:0043231 intracellular membrane-boun…	GO:0033130 acetylcholine receptor binding; GO:0005515 protein binding; GO:0005102 receptor binding; GO:0044183 protein binding involved in protein folding; GO:0005488 binding;				IPR032763;	Resistance to inhibitors of cholinesterase protein 3, N-terminal;
D3ZVR0	Gamma-tubulin complex component OS=Rattus norvegicus OX=10116 GN=Tubgcp4 PE=3 SV=3	0.744	Down	0.00096009	Tubgcp4	76.059	3.4	2	2	2	0.873	0.889	0.806	1.17	1.114	1.166	extracellular	GO:0051418 microtubule nucleation by microtubule organizing center; GO:0000003 reproduction; GO:0044085 cellular component biogenesis; GO:0016043 cellular component organization; GO:0007098 centrosome cycle; GO:1903046 meiotic cell cycle process; GO:0022414 reproductive process; GO:0031109 microtubule polymerization or depolymerization; GO:0048285 organelle fission; GO:0007067 mitotic nuclear div…	GO:0016020 membrane; GO:0044450 microtubule organizing center part; GO:0005874 microtubule; GO:0031410 cytoplasmic vesicle; GO:0031982 vesicle; GO:0005737 cytoplasm; GO:0032991 macromolecular complex; GO:0099512 supramolecular fiber; GO:0044424 intracellular part; GO:0099080 supramolecular complex; GO:0005623 cell; GO:0032155 cell division site part; GO:0044422 organelle part; GO:0055037 recyclin…	GO:0008092 cytoskeletal protein binding; GO:0005200 structural constituent of cytoskeleton; GO:0005488 binding; GO:0015631 tubulin binding; GO:0043015 gamma-tubulin binding; GO:0005515 protein binding; GO:0005198 structural molecule activity;	K16571	TUBGCP4, GCP4; gamma-tubulin complex component 4
Q498R1	Methionine synthase reductase OS=Rattus norvegicus OX=10116 GN=Mtrr PE=2 SV=2	1.348	Up	0.034383	Mtrr	78.024	3.9	2	3	2	1.315	0.97	1.175	0.867	0.814	0.886	mitochondria	GO:1901606 alpha-amino acid catabolic process; GO:0000097 sulfur amino acid biosynthetic process; GO:0016053 organic acid biosynthetic process; GO:1904041 regulation of cystathionine beta-synthase activity; GO:0044699 single-organism process; GO:0009058 biosynthetic process; GO:0044237 cellular metabolic process; GO:0032259 methylation; GO:0044272 sulfur compound biosynthetic process; GO:0000096 …	GO:0044424 intracellular part; GO:0005623 cell; GO:0044464 cell part; GO:0005622 intracellular; GO:0005737 cytoplasm;	GO:0016651 oxidoreductase activity, acting on NAD(P)H; GO:0016722 oxidoreductase activity, oxidizing metal ions; GO:1901265 nucleoside phosphate binding; GO:0016653 oxidoreductase activity, acting on NAD(P)H, heme protein as acceptor; GO:0050660 flavin adenine dinucleotide binding; GO:0050444 aquacobalamin reductase (NADPH) activity; GO:0070402 NADPH binding; GO:0043167 ion binding; GO:0000166 nu…	K00597	MTRR; methionine synthase reductase [EC:1.16.1.8]		IPR017927; IPR029039; IPR008254; IPR001433; IPR017938; IPR023173; IPR003097; IPR001709;	Ferredoxin reductase-type FAD-binding domain; Flavoprotein-like domain; Flavodoxin/nitric oxide synthase; Oxidoreductase FAD/NAD(P)-binding; Riboflavin synthase-like beta-barrel; NADPH-cytochrome p450 reductase, FAD-binding, alpha-helical domain-3; FAD-binding, type 1; Flavoprotein pyridine nucleotide cytochrome reductase;
F1LXY6	Uncharacterized protein OS=Rattus norvegicus OX=10116 PE=1 SV=2	0.79	Down	0.027677	---	11.247	36	3	4	3	0.87	0.965	0.831	1.176	1.008	1.189	cytoplasm			GO:0005515 protein binding; GO:0005488 binding;				IPR007110; IPR013783; IPR013106;	Immunoglobulin-like domain; Immunoglobulin-like fold; Immunoglobulin V-set domain;
Q505I5	Protein FAM133B OS=Rattus norvegicus OX=10116 GN=Fam133b PE=2 SV=1	0.798	Down	0.00060391	Fam133b	28.033	7.3	1	1	1	0.883	0.86	0.927	1.111	1.13	1.104	nucleus			GO:0097159 organic cyclic compound binding; GO:1901363 heterocyclic compound binding; GO:0003723 RNA binding; GO:0005488 binding; GO:0003676 nucleic acid binding;
P0C0A9	Small VCP/p97-interacting protein OS=Rattus norvegicus OX=10116 GN=Svip PE=1 SV=1	0.814	Down	0.0076224	Svip	8.2484	17.1	1	2	1	0.936	0.898	0.865	1.084	1.18	1.052	nucleus	GO:0032270 positive regulation of cellular protein metabolic process; GO:0051129 negative regulation of cellular component organization; GO:0031331 positive regulation of cellular catabolic process; GO:1903061 positive regulation of protein lipidation; GO:0090317 negative regulation of intracellular protein transport; GO:0009891 positive regulation of biosynthetic process; GO:1905897 regulation o…	GO:0005790 smooth endoplasmic reticulum; GO:0016020 membrane; GO:0042175 nuclear outer membrane-endoplasmic reticulum membrane network; GO:0044421 extracellular region part; GO:0005783 endoplasmic reticulum; GO:0031090 organelle membrane; GO:0098796 membrane protein complex; GO:0071944 cell periphery; GO:0031982 vesicle; GO:0005737 cytoplasm; GO:0032991 macromolecular complex; GO:0031224 intrinsi…	GO:0005515 protein binding; GO:0043621 protein self-association; GO:0051117 ATPase binding; GO:0005488 binding; GO:0019899 enzyme binding;	K14014	SVIP; small VCP/p97-interacting protein	rno04141 Protein processing in endoplasmic reticulum - Rattus norvegicus (rat);
Q4FZZ3	Glutathione S-transferase alpha-5 OS=Rattus norvegicus OX=10116 GN=Gsta5 PE=2 SV=1	3.213	Up	5.7122e-05	Gsta5	25.569	17.1	4	8	1	1.598	1.516	1.462	0.524	0.427	0.473	cytoplasm	GO:0008152 metabolic process;		GO:0004364 glutathione transferase activity; GO:0016765 transferase activity, transferring alkyl or aryl (other than methyl) groups; GO:0005515 protein binding; GO:0003824 catalytic activity; GO:0016740 transferase activity; GO:0005488 binding;	K00799	GST, gst; glutathione S-transferase [EC:2.5.1.18]	rno00480 Glutathione metabolism - Rattus norvegicus (rat); rno00980 Metabolism of xenobiotics by cytochrome P450 - Rattus norvegicus (rat); rno00982 Drug metabolism - cytochrome P450 - Rattus norvegicus (rat); rno00983 Drug metabolism - other enzymes - Rattus norvegicus (rat); rno01100 Metabolic pathways - Rattus norvegicus (rat); rno01524 Platinum drug resistance - Rattus norvegicus (rat); rno05…	IPR010987; IPR004046; IPR012336; IPR004045;	Glutathione S-transferase, C-terminal-like; Glutathione S-transferase, C-terminal; Thioredoxin-like fold; Glutathione S-transferase, N-terminal;
F1LQP8	Cadherin-6 OS=Rattus norvegicus OX=10116 GN=Cdh6 PE=1 SV=3	0.786	Down	0.0065234	Cdh6	88.449	1.4	1	1	1	0.857	0.861	0.93	1.143	1.042	1.182	mitochondria	GO:0050794 regulation of cellular process; GO:0044700 single organism signaling; GO:0051716 cellular response to stimulus; GO:0007166 cell surface receptor signaling pathway; GO:0098609 cell-cell adhesion; GO:0044699 single-organism process; GO:0023052 signaling; GO:0050896 response to stimulus; GO:0022610 biological adhesion; GO:0007165 signal transduction; GO:0050789 regulation of biological pr…	GO:0016020 membrane; GO:0044421 extracellular region part; GO:0071944 cell periphery; GO:0031982 vesicle; GO:0031224 intrinsic component of membrane; GO:0005623 cell; GO:0016021 integral component of membrane; GO:0005576 extracellular region; GO:0005886 plasma membrane; GO:0043226 organelle; GO:0070062 extracellular exosome; GO:0044425 membrane part; GO:0044464 cell part; GO:1903561 extracellular…	GO:0043169 cation binding; GO:0046872 metal ion binding; GO:0005509 calcium ion binding; GO:0005488 binding; GO:0043167 ion binding;	K06798	CDH6; cadherin 6, type 2, K-cadherin		IPR015919; IPR027397; IPR000233; IPR002126;	Cadherin-like; Catenin binding domain; Cadherin, cytoplasmic domain; Cadherin;
F7F557	Acyl-coenzyme A thioesterase 8 OS=Rattus norvegicus OX=10116 GN=Acot8 PE=1 SV=1	1.211	Up	0.047777	Acot8	42.025	9.1	3	3	3	1.204	1.027	1.067	0.896	0.838	0.989	mitochondria	GO:0050794 regulation of cellular process; GO:0016043 cellular component organization; GO:0043648 dicarboxylic acid metabolic process; GO:0060255 regulation of macromolecule metabolic process; GO:0048285 organelle fission; GO:0044699 single-organism process; GO:0031324 negative regulation of cellular metabolic process; GO:0048523 negative regulation of cellular process; GO:0048519 negative regula…	GO:0043229 intracellular organelle; GO:0044439 peroxisomal part; GO:0005777 peroxisome; GO:0005737 cytoplasm; GO:0044446 intracellular organelle part; GO:0044438 microbody part; GO:0044424 intracellular part; GO:0005623 cell; GO:0005739 mitochondrion; GO:0044422 organelle part; GO:0031974 membrane-enclosed lumen; GO:0043226 organelle; GO:0043231 intracellular membrane-bounded organelle; GO:007001…	GO:0052815 medium-chain acyl-CoA hydrolase activity; GO:0005102 receptor binding; GO:0003824 catalytic activity; GO:0005488 binding; GO:0016788 hydrolase activity, acting on ester bonds; GO:0047617 acyl-CoA hydrolase activity; GO:0016289 CoA hydrolase activity; GO:0016787 hydrolase activity; GO:0005515 protein binding; GO:0016790 thiolester hydrolase activity; GO:0016290 palmitoyl-CoA hydrolase a…	K11992	ACOT8, PTE; acyl-CoA thioesterase 8 [EC:3.1.2.27]	rno00120 Primary bile acid biosynthesis - Rattus norvegicus (rat); rno01100 Metabolic pathways - Rattus norvegicus (rat); rno04146 Peroxisome - Rattus norvegicus (rat);	IPR029069;	HotDog domain;
A0A0G2JUX5	Transcriptional activator protein Pur-beta OS=Rattus norvegicus OX=10116 GN=Purb PE=1 SV=1	1.403	Up	0.04076	Purb	33.532	24.3	6	9	1	1.048	1.292	1.161	0.778	0.719	0.998	cytoplasm	GO:0050794 regulation of cellular process; GO:0060255 regulation of macromolecule metabolic process; GO:0048869 cellular developmental process; GO:0019219 regulation of nucleobase-containing compound metabolic process; GO:0044699 single-organism process; GO:0048523 negative regulation of cellular process; GO:0031324 negative regulation of cellular metabolic process; GO:0048519 negative regulation…	GO:0043229 intracellular organelle; GO:0043232 intracellular non-membrane-bounded organelle; GO:0043601 nuclear replisome; GO:0044446 intracellular organelle part; GO:0032991 macromolecular complex; GO:0031981 nuclear lumen; GO:0044424 intracellular part; GO:0005623 cell; GO:0044422 organelle part; GO:0043596 nuclear replication fork; GO:0044427 chromosomal part; GO:0043228 non-membrane-bounded o…	GO:0000981 RNA polymerase II transcription factor activity, sequence-specific DNA binding; GO:0003677 DNA binding; GO:0003723 RNA binding; GO:0000976 transcription regulatory region sequence-specific DNA binding; GO:0003690 double-stranded DNA binding; GO:1990837 sequence-specific double-stranded DNA binding; GO:0001012 RNA polymerase II regulatory region DNA binding; GO:0003697 single-stranded D…	K21799	PURB; transcriptional activator protein Pur-beta
F1M8Y2	Tetraspanin OS=Rattus norvegicus OX=10116 GN=Tspan7 PE=1 SV=3	0.812	Down	0.0039624	Tspan7	22.336	20.4	5	20	5	0.923	0.872	0.908	1.092	1.175	1.061	plasma membrane	GO:0016477 cell migration; GO:0050900 leukocyte migration; GO:0051674 localization of cell; GO:0044763 single-organism cellular process; GO:0044699 single-organism process; GO:0006928 movement of cell or subcellular component; GO:0002376 immune system process; GO:0048870 cell motility; GO:0040011 locomotion; GO:0051179 localization; GO:0009987 cellular process;	GO:0016020 membrane; GO:0044464 cell part; GO:0071944 cell periphery; GO:0044425 membrane part; GO:0031224 intrinsic component of membrane; GO:0005623 cell; GO:0016021 integral component of membrane; GO:0005886 plasma membrane;		K06571	TSPAN7, TM4SF2, MXS1, CD231; tetraspanin-7	rno05202 Transcriptional misregulation in cancer - Rattus norvegicus (rat);	IPR008952;	Tetraspanin, EC2 domain;
A0A096MJ90	Lymphocyte antigen 6 family member H (Fragment) OS=Rattus norvegicus OX=10116 GN=Ly6h PE=4 SV=6	0.829	Down	0.034701	Ly6h	13.181	18.5	2	6	2	0.957	0.927	0.818	1.059	1.166	1.036	extracellular				K06846	LY6D_E_G6_H; lymphocyte antigen 6 complex locus protein D/E/G6/H		IPR016054;	Ly-6 antigen/uPA receptor-like;
M0RBD5	Uncharacterized protein OS=Rattus norvegicus OX=10116 PE=1 SV=1	0.573	Down	0.031759	---	11.023	33	3	7	2	0.715	0.81	0.669	1.537	0.919	1.371	cytoplasm,nucleus			GO:0005515 protein binding; GO:0005488 binding;	K06856	IGH; immunoglobulin heavy chain	rno04020 Calcium signaling pathway - Rattus norvegicus (rat); rno04064 NF-kappa B signaling pathway - Rattus norvegicus (rat); rno04072 Phospholipase D signaling pathway - Rattus norvegicus (rat); rno04145 Phagosome - Rattus norvegicus (rat); rno04151 PI3K-Akt signaling pathway - Rattus norvegicus (rat); rno04640 Hematopoietic cell lineage - Rattus norvegicus (rat); rno04650 Natural killer cell m…	IPR007110; IPR013783; IPR013106;	Immunoglobulin-like domain; Immunoglobulin-like fold; Immunoglobulin V-set domain;
P43278	Histone H1.0 OS=Rattus norvegicus OX=10116 GN=H1f0 PE=2 SV=2	0.712	Down	0.033642	H1f0	20.885	22.2	4	14	4	0.99	0.726	0.784	1.174	1.282	1.056	nucleus	GO:0044085 cellular component biogenesis; GO:0016043 cellular component organization; GO:0034728 nucleosome organization; GO:0034622 cellular macromolecular complex assembly; GO:0006333 chromatin assembly or disassembly; GO:0043933 macromolecular complex subunit organization; GO:0065004 protein-DNA complex assembly; GO:0006323 DNA packaging; GO:0006334 nucleosome assembly; GO:0051276 chromosome o…	GO:0043229 intracellular organelle; GO:0043232 intracellular non-membrane-bounded organelle; GO:0044446 intracellular organelle part; GO:0032991 macromolecular complex; GO:0044424 intracellular part; GO:0005623 cell; GO:0044422 organelle part; GO:0044427 chromosomal part; GO:0000786 nucleosome; GO:0043228 non-membrane-bounded organelle; GO:0043231 intracellular membrane-bounded organelle; GO:0043…	GO:0097159 organic cyclic compound binding; GO:1901363 heterocyclic compound binding; GO:0003677 DNA binding; GO:0005488 binding; GO:0003676 nucleic acid binding;	K11275	H1_5; histone H1/5		IPR011991; IPR005818;	Winged helix-turn-helix DNA-binding domain; Linker histone H1/H5, domain H15;
P50123	Glutamyl aminopeptidase OS=Rattus norvegicus OX=10116 GN=Enpep PE=1 SV=2	1.206	Up	0.0154607	Enpep	107.99	26.7	22	42	22	1	1.154	1.13	0.924	0.891	0.907	endoplasmic reticulum	GO:0008217 regulation of blood pressure; GO:0016477 cell migration; GO:0065008 regulation of biological quality; GO:0006518 peptide metabolic process; GO:0006725 cellular aromatic compound metabolic process; GO:0051674 localization of cell; GO:0060255 regulation of macromolecule metabolic process; GO:0016486 peptide hormone processing; GO:0044699 single-organism process; GO:0016485 protein proces…	GO:0016020 membrane; GO:0031090 organelle membrane; GO:0031982 vesicle; GO:0005737 cytoplasm; GO:0031224 intrinsic component of membrane; GO:0012506 vesicle membrane; GO:0044424 intracellular part; GO:0005623 cell; GO:0016021 integral component of membrane; GO:0044422 organelle part; GO:0043226 organelle; GO:0031974 membrane-enclosed lumen; GO:0031983 vesicle lumen; GO:0005622 intracellular; GO:0…	GO:0008238 exopeptidase activity; GO:0008233 peptidase activity; GO:0043167 ion binding; GO:0070006 metalloaminopeptidase activity; GO:0008235 metalloexopeptidase activity; GO:0004177 aminopeptidase activity; GO:0016787 hydrolase activity; GO:0008237 metallopeptidase activity; GO:0033218 amide binding; GO:0008270 zinc ion binding; GO:0046914 transition metal ion binding; GO:0042277 peptide bindin…	K11141	ENPEP, CD249; glutamyl aminopeptidase [EC:3.4.11.7]	rno04614 Renin-angiotensin system - Rattus norvegicus (rat);	IPR014782; IPR024571;	Peptidase M1, membrane alanine aminopeptidase, N-terminal; ERAP1-like C-terminal domain;
F1LRS1	MAP3K12-binding inhibitory protein 1 OS=Rattus norvegicus OX=10116 GN=Mbip PE=4 SV=1	0.828	Down	0.0194846	Mbip	38.336	6.5	2	2	2	0.898	0.888	0.937	1.1	1.182	1.006	cytoplasm	GO:0051188 cofactor biosynthetic process; GO:0009116 nucleoside metabolic process; GO:0042278 purine nucleoside metabolic process; GO:0043545 molybdopterin cofactor metabolic process; GO:0032324 molybdopterin cofactor biosynthetic process; GO:0009117 nucleotide metabolic process; GO:0044699 single-organism process; GO:0009058 biosynthetic process; GO:0044237 cellular metabolic process; GO:0006796…	GO:0005737 cytoplasm; GO:0032991 macromolecular complex; GO:0044424 intracellular part; GO:0005623 cell; GO:0000123 histone acetyltransferase complex; GO:0044422 organelle part; GO:0043228 non-membrane-bounded organelle; GO:0031974 membrane-enclosed lumen; GO:1902494 catalytic complex; GO:0005654 nucleoplasm; GO:0031248 protein acetyltransferase complex; GO:0070013 intracellular organelle lumen; …	GO:0042802 identical protein binding; GO:0003824 catalytic activity; GO:0005488 binding; GO:0030366 molybdopterin synthase activity; GO:0005515 protein binding; GO:0016782 transferase activity, transferring sulfur-containing groups; GO:0016783 sulfurtransferase activity; GO:0016740 transferase activity;
Q6QGW5	Steroid receptor RNA activator 1 OS=Rattus norvegicus OX=10116 GN=Sra1 PE=1 SV=1	0.81	Down	0.0032836	Sra1	25.263	29.4	5	9	2	0.885	0.916	0.89	1.178	1.074	1.069	nucleus	GO:2000273 positive regulation of receptor activity; GO:0010941 regulation of cell death; GO:0097659 nucleic acid-templated transcription; GO:0048869 cellular developmental process; GO:0023051 regulation of signaling; GO:0044699 single-organism process; GO:0009058 biosynthetic process; GO:0044237 cellular metabolic process; GO:0010469 regulation of receptor activity; GO:2001141 regulation of RNA …	GO:0043226 organelle; GO:0043231 intracellular membrane-bounded organelle; GO:0043229 intracellular organelle; GO:0005634 nucleus; GO:0044464 cell part; GO:0005622 intracellular; GO:0005737 cytoplasm; GO:0032991 macromolecular complex; GO:0044424 intracellular part; GO:1990904 ribonucleoprotein complex; GO:0030529 intracellular ribonucleoprotein complex; GO:0043227 membrane-bounded organelle; GO:…	GO:0030374 ligand-dependent nuclear receptor transcription coactivator activity; GO:0005102 receptor binding; GO:0005488 binding; GO:0016922 ligand-dependent nuclear receptor binding; GO:0000989 transcription factor activity, transcription factor binding; GO:0003713 transcription coactivator activity; GO:0005515 protein binding; GO:0003712 transcription cofactor activity; GO:0000988 transcription…
M0RCL1	BEN domain-containing 3 OS=Rattus norvegicus OX=10116 GN=Bend3 PE=4 SV=1	1.223	Up	0.0025199	Bend3	93.921	1.5	1	1	1	1.121	1.081	1.105	0.871	0.952	0.88	nucleus	GO:0044699 single-organism process; GO:0051253 negative regulation of RNA metabolic process; GO:0044237 cellular metabolic process; GO:0032259 methylation; GO:2001141 regulation of RNA biosynthetic process; GO:0008152 metabolic process; GO:0008213 protein alkylation; GO:0043543 protein acylation; GO:0010558 negative regulation of macromolecule biosynthetic process; GO:0043170 macromolecule metabo…	GO:0043229 intracellular organelle; GO:0043232 intracellular non-membrane-bounded organelle; GO:0044446 intracellular organelle part; GO:0031981 nuclear lumen; GO:0044424 intracellular part; GO:0005730 nucleolus; GO:0005623 cell; GO:0000792 heterochromatin; GO:0044422 organelle part; GO:0044427 chromosomal part; GO:0005720 nuclear heterochromatin; GO:0043228 non-membrane-bounded organelle; GO:004…	GO:0097159 organic cyclic compound binding; GO:1901363 heterocyclic compound binding; GO:0000182 rDNA binding; GO:0003677 DNA binding; GO:0003690 double-stranded DNA binding; GO:0005488 binding; GO:1990837 sequence-specific double-stranded DNA binding; GO:0003676 nucleic acid binding; GO:0043565 sequence-specific DNA binding;				IPR018379;	BEN domain;
D4A9F7	Serpin family E member 3 OS=Rattus norvegicus OX=10116 GN=Serpine3 PE=3 SV=1	0.822	Down	0.0030369	Serpine3	44.203	2	1	1	1	0.942	0.907	0.865	1.119	1.121	1.061	extracellular	GO:0050794 regulation of cellular process; GO:0052548 regulation of endopeptidase activity; GO:0010951 negative regulation of endopeptidase activity; GO:0045861 negative regulation of proteolysis; GO:0080090 regulation of primary metabolic process; GO:0060255 regulation of macromolecule metabolic process; GO:0030162 regulation of proteolysis; GO:0031324 negative regulation of cellular metabolic p…	GO:0005615 extracellular space; GO:0044421 extracellular region part; GO:0005576 extracellular region;	GO:0004867 serine-type endopeptidase inhibitor activity; GO:0030234 enzyme regulator activity; GO:0030414 peptidase inhibitor activity; GO:0061134 peptidase regulator activity; GO:0061135 endopeptidase regulator activity; GO:0098772 molecular function regulator; GO:0004857 enzyme inhibitor activity; GO:0004866 endopeptidase inhibitor activity;				IPR023796;	Serpin domain;
F7FHF3	Serpin family F member 2 OS=Rattus norvegicus OX=10116 GN=Serpinf2 PE=1 SV=1	0.833	Down	0.009516	Serpinf2	62.291	13.5	7	9	7	0.943	0.883	0.919	1.102	1.032	1.16	nucleus	GO:0065008 regulation of biological quality; GO:0032872 regulation of stress-activated MAPK cascade; GO:0032270 positive regulation of cellular protein metabolic process; GO:0030199 collagen fibril organization; GO:1903318 negative regulation of protein maturation; GO:0009891 positive regulation of biosynthetic process; GO:0002034 regulation of blood vessel diameter by renin-angiotensin; GO:00104…	GO:0005577 fibrinogen complex; GO:0005615 extracellular space; GO:0044421 extracellular region part; GO:0031982 vesicle; GO:0032991 macromolecular complex; GO:0005623 cell; GO:0005576 extracellular region; GO:0043226 organelle; GO:0070062 extracellular exosome; GO:0072562 blood microparticle; GO:0044464 cell part; GO:1903561 extracellular vesicle; GO:0009986 cell surface; GO:0043234 protein compl…	GO:0046983 protein dimerization activity; GO:0061134 peptidase regulator activity; GO:0005515 protein binding; GO:0004857 enzyme inhibitor activity; GO:0098772 molecular function regulator; GO:0004866 endopeptidase inhibitor activity; GO:0002020 protease binding; GO:0004867 serine-type endopeptidase inhibitor activity; GO:0042802 identical protein binding; GO:0030234 enzyme regulator activity; GO…	K03983	SERPINF2, AAP; alpha-2-antiplasmin	rno04610 Complement and coagulation cascades - Rattus norvegicus (rat);	IPR033833; IPR023796;	Alpha2-antiplasmin; Serpin domain;
F1M6D0	Mitochondrial ribosomal protein S6 OS=Rattus norvegicus OX=10116 GN=Mrps6 PE=1 SV=2	1.246	Up	0.046838	Mrps6	14.341	13.6	2	3	2	1.003	1.063	1.262	0.909	0.927	0.834	cytoplasm	GO:0006518 peptide metabolic process; GO:0043043 peptide biosynthetic process; GO:0044267 cellular protein metabolic process; GO:0006807 nitrogen compound metabolic process; GO:0009058 biosynthetic process; GO:0043603 cellular amide metabolic process; GO:0044238 primary metabolic process; GO:1901566 organonitrogen compound biosynthetic process; GO:1901576 organic substance biosynthetic process; G…	GO:0005759 mitochondrial matrix; GO:0005840 ribosome; GO:0043229 intracellular organelle; GO:0000314 organellar small ribosomal subunit; GO:0044429 mitochondrial part; GO:0043232 intracellular non-membrane-bounded organelle; GO:0015935 small ribosomal subunit; GO:0044446 intracellular organelle part; GO:0005737 cytoplasm; GO:0032991 macromolecular complex; GO:0044424 intracellular part; GO:000576…	GO:0097159 organic cyclic compound binding; GO:1901363 heterocyclic compound binding; GO:0003723 RNA binding; GO:0005488 binding; GO:0003676 nucleic acid binding; GO:0070181 small ribosomal subunit rRNA binding; GO:0003735 structural constituent of ribosome; GO:0005198 structural molecule activity; GO:0019843 rRNA binding;	K02990	RP-S6, MRPS6, rpsF; small subunit ribosomal protein S6	rno03010 Ribosome - Rattus norvegicus (rat);	IPR014717;	Translation elongation factor EF1B/ribosomal protein S6;
B0K018	Phospholipase A2, group XIIA OS=Rattus norvegicus OX=10116 GN=Pla2g12a PE=2 SV=1	1.234	Up	0.0135838	Pla2g12a	21.094	13	2	2	2	1.136	1.059	1.125	0.977	0.873	0.84	extracellular	GO:0046717 acid secretion; GO:0050482 arachidonic acid secretion; GO:0044699 single-organism process; GO:0044255 cellular lipid metabolic process; GO:0044237 cellular metabolic process; GO:0006796 phosphate-containing compound metabolic process; GO:0051234 establishment of localization; GO:0071704 organic substance metabolic process; GO:0032309 icosanoid secretion; GO:0015908 fatty acid transport…	GO:0043226 organelle; GO:0043231 intracellular membrane-bounded organelle; GO:0043229 intracellular organelle; GO:0005783 endoplasmic reticulum; GO:0044464 cell part; GO:0005622 intracellular; GO:0005737 cytoplasm; GO:0012505 endomembrane system; GO:0044424 intracellular part; GO:0005794 Golgi apparatus; GO:0043227 membrane-bounded organelle; GO:0005623 cell; GO:0005576 extracellular region; GO:0…	GO:0052689 carboxylic ester hydrolase activity; GO:0003824 catalytic activity; GO:0005488 binding; GO:0043167 ion binding; GO:0004623 phospholipase A2 activity; GO:0016788 hydrolase activity, acting on ester bonds; GO:0004620 phospholipase activity; GO:0043169 cation binding; GO:0046872 metal ion binding; GO:0016787 hydrolase activity; GO:0005509 calcium ion binding; GO:0016298 lipase activity;	K01047	PLA2G, SPLA2; secretory phospholipase A2 [EC:3.1.1.4]	rno00564 Glycerophospholipid metabolism - Rattus norvegicus (rat); rno00565 Ether lipid metabolism - Rattus norvegicus (rat); rno00590 Arachidonic acid metabolism - Rattus norvegicus (rat); rno00591 Linoleic acid metabolism - Rattus norvegicus (rat); rno00592 alpha-Linolenic acid metabolism - Rattus norvegicus (rat); rno01100 Metabolic pathways - Rattus norvegicus (rat); rno04014 Ras signaling pa…	IPR016090;	Phospholipase A2 domain;
O70534	Protein delta homolog 1 OS=Rattus norvegicus OX=10116 GN=Dlk1 PE=1 SV=1	1.306	Up	0.00133888	Dlk1	41.149	32.6	11	20	11	1.059	1.153	1.134	0.871	0.873	0.819	extracellular,plasma membrane	GO:0050794 regulation of cellular process; GO:0032502 developmental process; GO:0009968 negative regulation of signal transduction; GO:0023051 regulation of signaling; GO:0048869 cellular developmental process; GO:0044763 single-organism cellular process; GO:0044699 single-organism process; GO:0048519 negative regulation of biological process; GO:0048523 negative regulation of cellular process; G…	GO:0016020 membrane; GO:0005615 extracellular space; GO:0044421 extracellular region part; GO:0044425 membrane part; GO:0031224 intrinsic component of membrane; GO:0005576 extracellular region; GO:0016021 integral component of membrane;	GO:0043169 cation binding; GO:0046872 metal ion binding; GO:0005515 protein binding; GO:0005509 calcium ion binding; GO:0005488 binding; GO:0043167 ion binding;				IPR001881; IPR000742;	EGF-like calcium-binding domain; EGF-like domain;
G3V6K6	Receptor protein-tyrosine kinase OS=Rattus norvegicus OX=10116 GN=Egfr PE=1 SV=1	0.6	Down	0.04352	Egfr	134.9	5	5	5	5	0.726	0.798	0.736	0.968	1.124	1.674	plasma membrane	GO:0044700 single organism signaling; GO:0048732 gland development; GO:0022414 reproductive process; GO:0010608 posttranscriptional regulation of gene expression; GO:0071384 cellular response to corticosteroid stimulus; GO:0018212 peptidyl-tyrosine modification; GO:0044255 cellular lipid metabolic process; GO:0010564 regulation of cell cycle process; GO:0044237 cellular metabolic process; GO:0001…	GO:0016323 basolateral plasma membrane; GO:0016020 membrane; GO:0016324 apical plasma membrane; GO:0031410 cytoplasmic vesicle; GO:0031090 organelle membrane; GO:0030054 cell junction; GO:0098857 membrane microdomain; GO:0071944 cell periphery; GO:0031982 vesicle; GO:0005737 cytoplasm; GO:0044433 cytoplasmic vesicle part; GO:0032991 macromolecular complex; GO:0031224 intrinsic component of membra…	GO:0051015 actin filament binding; GO:0016773 phosphotransferase activity, alcohol group as acceptor; GO:0019903 protein phosphatase binding; GO:0031625 ubiquitin protein ligase binding; GO:0019838 growth factor binding; GO:0042562 hormone binding; GO:0005178 integrin binding; GO:0004672 protein kinase activity; GO:0004871 signal transducer activity; GO:0097159 organic cyclic compound binding; GO…	K04361	EGFR, ERBB1; epidermal growth factor receptor [EC:2.7.10.1]	rno01521 EGFR tyrosine kinase inhibitor resistance - Rattus norvegicus (rat); rno01522 Endocrine resistance - Rattus norvegicus (rat); rno04010 MAPK signaling pathway - Rattus norvegicus (rat); rno04012 ErbB signaling pathway - Rattus norvegicus (rat); rno04014 Ras signaling pathway - Rattus norvegicus (rat); rno04015 Rap1 signaling pathway - Rattus norvegicus (rat); rno04020 Calcium signaling pa…	IPR000494; IPR001245; IPR032675; IPR009030; IPR011009; IPR006211; IPR000719; IPR020635; IPR032778;	Receptor L-domain; Serine-threonine/tyrosine-protein kinase catalytic domain; Leucine-rich repeat domain, L domain-like; Growth factor receptor cysteine-rich domain; Protein kinase-like domain; Furin-like cysteine-rich domain; Protein kinase domain; Tyrosine-protein kinase, catalytic domain; Growth factor receptor domain 4;
F1LTN6	Uncharacterized protein OS=Rattus norvegicus OX=10116 PE=1 SV=2	0.826	Down	0.043279	---	24.915	29.4	5	26	3	0.901	0.908	0.896	1.131	1.005	1.139	extracellular	GO:0002376 immune system process; GO:0002377 immunoglobulin production; GO:0002440 production of molecular mediator of immune response; GO:0006955 immune response; GO:0050896 response to stimulus;	GO:0005615 extracellular space; GO:0044421 extracellular region part; GO:0005576 extracellular region;	GO:0005515 protein binding; GO:0005488 binding;				IPR007110; IPR013783; IPR003599; IPR013106; IPR003597;	Immunoglobulin-like domain; Immunoglobulin-like fold; Immunoglobulin subtype; Immunoglobulin V-set domain; Immunoglobulin C1-set;
P12346	Serotransferrin OS=Rattus norvegicus OX=10116 GN=Tf PE=1 SV=3	0.797	Down	0.0039007	Tf	76.394	55.6	43	180	1	0.872	0.906	0.89	1.069	1.081	1.197	extracellular	GO:0065008 regulation of biological quality; GO:0014013 regulation of gliogenesis; GO:0048869 cellular developmental process; GO:0022008 neurogenesis; GO:0046683 response to organophosphorus; GO:0044699 single-organism process; GO:0031643 positive regulation of myelination; GO:0051234 establishment of localization; GO:0000041 transition metal ion transport; GO:0051240 positive regulation of multi…	GO:0031012 extracellular matrix; GO:0051286 cell tip; GO:0005615 extracellular space; GO:0044421 extracellular region part; GO:0044464 cell part; GO:0005578 proteinaceous extracellular matrix; GO:0005623 cell; GO:0005576 extracellular region; GO:0044420 extracellular matrix component; GO:0005604 basement membrane;	GO:0005506 iron ion binding; GO:0015075 ion transmembrane transporter activity; GO:0043167 ion binding; GO:0022892 substrate-specific transporter activity; GO:0046915 transition metal ion transmembrane transporter activity; GO:0022891 substrate-specific transmembrane transporter activity; GO:0072510 trivalent inorganic cation transmembrane transporter activity; GO:0046873 metal ion transmembrane …	K14736	TF; transferrin	rno04066 HIF-1 signaling pathway - Rattus norvegicus (rat); rno04216 Ferroptosis - Rattus norvegicus (rat); rno04978 Mineral absorption - Rattus norvegicus (rat);	IPR001156;	Transferrin-like domain;
F1M7S3	Proenkephalin-B OS=Rattus norvegicus OX=10116 GN=Pdyn PE=3 SV=1	0.746	Down	0.040216	Pdyn	28.136	31.5	4	6	4	0.875	0.705	0.974	1.109	1.218	1.098	extracellular	GO:0007186 G-protein coupled receptor signaling pathway; GO:0050794 regulation of cellular process; GO:0044700 single organism signaling; GO:0051716 cellular response to stimulus; GO:0007165 signal transduction; GO:0050789 regulation of biological process; GO:0007154 cell communication; GO:0044699 single-organism process; GO:0023052 signaling; GO:0050896 response to stimulus; GO:0009987 cellular …	GO:0016020 membrane; GO:0005623 cell; GO:0044464 cell part; GO:0071944 cell periphery; GO:0005576 extracellular region; GO:0005886 plasma membrane;	GO:0001515 opioid peptide activity; GO:0005515 protein binding; GO:0005102 receptor binding; GO:0005488 binding;	K15840	PDYN, PENKB; proenkephalin B (prodynorphin)	rno04080 Neuroactive ligand-receptor interaction - Rattus norvegicus (rat); rno05030 Cocaine addiction - Rattus norvegicus (rat); rno05031 Amphetamine addiction - Rattus norvegicus (rat); rno05034 Alcoholism - Rattus norvegicus (rat);
P49192	Cocaine- and amphetamine-regulated transcript protein OS=Rattus norvegicus OX=10116 GN=Cartpt PE=1 SV=1	1.459	Up	0.0088594	Cartpt	14.14	32.6	4	11	4	1.021	1.238	1.311	0.834	0.784	0.829	extracellular	GO:0044700 single organism signaling; GO:0051971 positive regulation of transmission of nerve impulse; GO:0009914 hormone transport; GO:0045777 positive regulation of blood pressure; GO:0065008 regulation of biological quality; GO:0007586 digestion; GO:0032270 positive regulation of cellular protein metabolic process; GO:0042593 glucose homeostasis; GO:0050796 regulation of insulin secretion; GO:…	GO:0097708 intracellular vesicle; GO:0043229 intracellular organelle; GO:0005615 extracellular space; GO:0044421 extracellular region part; GO:0031410 cytoplasmic vesicle; GO:0005737 cytoplasm; GO:0031982 vesicle; GO:0012505 endomembrane system; GO:0044424 intracellular part; GO:0005623 cell; GO:0005576 extracellular region; GO:0043226 organelle; GO:0005622 intracellular; GO:0044464 cell part; GO…	GO:0005515 protein binding; GO:0005102 receptor binding; GO:0005184 neuropeptide hormone activity; GO:0005488 binding; GO:0005179 hormone activity;
A0A0G2K535	Bromodomain adjacent to zinc finger domain, 2B OS=Rattus norvegicus OX=10116 GN=Baz2b PE=1 SV=1	1.204	Up	0.0134177	Baz2b	233.16	0.9	2	2	2	1.073	1.087	1.121	0.966	0.837	0.923	nucleus		GO:0043226 organelle; GO:0043231 intracellular membrane-bounded organelle; GO:0043229 intracellular organelle; GO:0005634 nucleus; GO:0044464 cell part; GO:0005622 intracellular; GO:0044424 intracellular part; GO:0043227 membrane-bounded organelle; GO:0005623 cell;	GO:0097159 organic cyclic compound binding; GO:1901363 heterocyclic compound binding; GO:0003677 DNA binding; GO:0046914 transition metal ion binding; GO:0005488 binding; GO:0003676 nucleic acid binding; GO:0043167 ion binding; GO:0043169 cation binding; GO:0046872 metal ion binding; GO:0005515 protein binding; GO:0008270 zinc ion binding;				IPR001965; IPR001487; IPR018501; IPR013083; IPR016177; IPR011011; IPR001739; IPR019787; IPR028941;	Zinc finger, PHD-type; Bromodomain; DDT domain; Zinc finger, RING/FYVE/PHD-type; DNA-binding domain; Zinc finger, FYVE/PHD-type; Methyl-CpG DNA binding; Zinc finger, PHD-finger; WHIM2 domain;

## Sheet: phosphoproteomic
Protein accession	Position	GnRH/NC Ratio	Regulated Type	GnRH/NC P value	Amino acid	Protein description	Gene name	Localization probability	PEP	Score	Modified sequence	Charge	Mass error [ppm]	MS/MS Count	GnRH_1	GnRH_2	GnRH_3	NC_1	NC_2	NC_3	Subcellular localization	Biological Process	Cellular Component	Molecular Function	KEGG KO No.	KEGG Gene	KEGG pathway	IPR ID	Domain description
A0A0G2K719	90	0.728	Down	0.033925	S	DEAD-box helicase 3, X-linked OS=Rattus norvegicus OX=10116 GN=Ddx3x PE=1 SV=1	Ddx3x	0.878742	0.00273881	61.265	SSFFGDRGS(0.879)GS(0.121)R	3	-0.22432	1	0.822178	0.817922	0.938446	1.12091	1.38552	1.03366	nucleus	GO:0006518 peptide metabolic process; GO:0006725 cellular aromatic compound metabolic process; GO:0060255 regulation of macromolecule metabolic process; GO:0044267 cellular protein metabolic process; GO:0009058 biosynthetic process; GO:1901566 organonitrogen compound biosynthetic process; GO:0044237 cellular metabolic process; GO:0071704 organic substance metabolic process; GO:0008152 metabolic p…	GO:0043226 organelle; GO:0043229 intracellular organelle; GO:0043232 intracellular non-membrane-bounded organelle; GO:0005622 intracellular; GO:0044464 cell part; GO:0035770 ribonucleoprotein granule; GO:0005737 cytoplasm; GO:0032991 macromolecular complex; GO:0044424 intracellular part; GO:1990904 ribonucleoprotein complex; GO:0030529 intracellular ribonucleoprotein complex; GO:0005623 cell; GO:…	GO:1901265 nucleoside phosphate binding; GO:0008026 ATP-dependent helicase activity; GO:0016817 hydrolase activity, acting on acid anhydrides; GO:0016787 hydrolase activity; GO:0016887 ATPase activity; GO:0097159 organic cyclic compound binding; GO:1901363 heterocyclic compound binding; GO:0016462 pyrophosphatase activity; GO:0003824 catalytic activity; GO:0032553 ribonucleotide binding; GO:00054…	K11594	DDX3X, bel; ATP-dependent RNA helicase DDX3X [EC:3.6.4.13]	rno04622 RIG-I-like receptor signaling pathway - Rattus norvegicus (rat); rno05161 Hepatitis B - Rattus norvegicus (rat); rno05203 Viral carcinogenesis - Rattus norvegicus (rat);	IPR014014; IPR011545; IPR027417; IPR014001; IPR001650;	RNA helicase, DEAD-box type, Q motif; DEAD/DEAH box helicase domain; P-loop containing nucleoside triphosphate hydrolase; Helicase superfamily 1/2, ATP-binding domain; Helicase, C-terminal;
D3ZVJ9	491	0.683	Down	0.024396	S	WD repeat domain 20 OS=Rattus norvegicus OX=10116 GN=Wdr20 PE=1 SV=2	Wdr20	0.97436	3.32876e-05	115.91	S(0.974)S(0.026)DKLNLVTK	3	-0.059378	1	0.788538	0.66997	0.964989	1.25351	1.11418	1.17824	cytoplasm			GO:0005515 protein binding; GO:0005488 binding;				IPR017986; IPR015943;	WD40-repeat-containing domain; WD40/YVTN repeat-like-containing domain;
G3V7E6	542	1.3	Up	0.022818	S	Pericentriolar material 1 OS=Rattus norvegicus OX=10116 GN=Pcm1 PE=1 SV=1	Pcm1	0.99905	2.81382e-26	167.27	DEETEESEYDS(0.999)EHEHS(0.001)EPVTNIR	4	1.5861	1	1.17659	1.15025	1.09617	1	0.848365	0.785714	nucleus	GO:0044085 cellular component biogenesis; GO:0016043 cellular component organization; GO:0034453 microtubule anchoring; GO:1905508 protein localization to microtubule organizing center; GO:0044763 single-organism cellular process; GO:0060271 cilium assembly; GO:0044699 single-organism process; GO:0007017 microtubule-based process; GO:0030031 cell projection assembly; GO:0044782 cilium organizatio…	GO:0043229 intracellular organelle; GO:0043232 intracellular non-membrane-bounded organelle; GO:0044430 cytoskeletal part; GO:0044446 intracellular organelle part; GO:0044424 intracellular part; GO:0005623 cell; GO:0044422 organelle part; GO:0043228 non-membrane-bounded organelle; GO:0043226 organelle; GO:0005856 cytoskeleton; GO:0005815 microtubule organizing center; GO:0015630 microtubule cytos…		K16537	PCM1; pericentriolar material 1 protein		IPR031446;	Pericentriolar material 1 protein, C-terminal;
D4AAH9	468	1.288	Up	0.0180621	S	TBC1 domain family, member 23 OS=Rattus norvegicus OX=10116 GN=Tbc1d23 PE=1 SV=2	Tbc1d23	0.861626	4.6748e-05	86.073	GS(0.989)IS(0.862)S(0.149)VDGESCNGSNDR	3	0.69603	4	1.05745	1.11336	1.20807	0.796314	0.957317	0.869857	cytoplasm	GO:0032755 positive regulation of interleukin-6 production; GO:1903555 regulation of tumor necrosis factor superfamily cytokine production; GO:0032680 regulation of tumor necrosis factor production; GO:0001819 positive regulation of cytokine production; GO:0032675 regulation of interleukin-6 production; GO:0032101 regulation of response to external stimulus; GO:0080134 regulation of response to s…	GO:0043226 organelle; GO:0043231 intracellular membrane-bounded organelle; GO:0043229 intracellular organelle; GO:0044464 cell part; GO:0005622 intracellular; GO:0005737 cytoplasm; GO:0012505 endomembrane system; GO:0044424 intracellular part; GO:0005623 cell; GO:0043227 membrane-bounded organelle; GO:0005794 Golgi apparatus; GO:0044444 cytoplasmic part;		K22555			IPR001763; IPR000195;	Rhodanese-like domain; Rab-GTPase-TBC domain;
D4AAH9	520	0.542	Down	0.027936	S	TBC1 domain family, member 23 OS=Rattus norvegicus OX=10116 GN=Tbc1d23 PE=1 SV=2	Tbc1d23	1	0.000399366	88.009	MS(1)FNLPWPDR	2	0.11028	1	0.588121	0.610324	0.885093	1.18429	1.60976	1.05167	cytoplasm	GO:0032755 positive regulation of interleukin-6 production; GO:1903555 regulation of tumor necrosis factor superfamily cytokine production; GO:0032680 regulation of tumor necrosis factor production; GO:0001819 positive regulation of cytokine production; GO:0032675 regulation of interleukin-6 production; GO:0032101 regulation of response to external stimulus; GO:0080134 regulation of response to s…	GO:0043226 organelle; GO:0043231 intracellular membrane-bounded organelle; GO:0043229 intracellular organelle; GO:0044464 cell part; GO:0005622 intracellular; GO:0005737 cytoplasm; GO:0012505 endomembrane system; GO:0044424 intracellular part; GO:0005623 cell; GO:0043227 membrane-bounded organelle; GO:0005794 Golgi apparatus; GO:0044444 cytoplasmic part;		K22555			IPR001763; IPR000195;	Rhodanese-like domain; Rab-GTPase-TBC domain;
D3ZYD7	1292	0.814	Down	0.0086795	S	Coiled coil domain-containing 88A OS=Rattus norvegicus OX=10116 GN=Ccdc88a PE=1 SV=3	Ccdc88a	0.812204	0.000507357	94.363	S(0.812)S(0.188)PMLQHK	3	-0.27164	2	0.841506	0.875752	0.957992	1.07392	1.1397	1.07354	nucleus	GO:0044700 single organism signaling; GO:0044085 cellular component biogenesis; GO:0097581 lamellipodium organization; GO:0032270 positive regulation of cellular protein metabolic process; GO:0051674 localization of cell; GO:0060491 regulation of cell projection assembly; GO:0048869 cellular developmental process; GO:0022008 neurogenesis; GO:0044699 single-organism process; GO:1902115 regulation …	GO:0016020 membrane; GO:0005783 endoplasmic reticulum; GO:0044450 microtubule organizing center part; GO:0031410 cytoplasmic vesicle; GO:0071944 cell periphery; GO:0031982 vesicle; GO:0005737 cytoplasm; GO:0044424 intracellular part; GO:0005623 cell; GO:0044422 organelle part; GO:0043228 non-membrane-bounded organelle; GO:0005856 cytoskeleton; GO:0005815 microtubule organizing center; GO:0015630 …	GO:0043167 ion binding; GO:0046983 protein dimerization activity; GO:0019901 protein kinase binding; GO:0015631 tubulin binding; GO:0005515 protein binding; GO:0019900 kinase binding; GO:0043422 protein kinase B binding; GO:0042802 identical protein binding; GO:0008092 cytoskeletal protein binding; GO:0005488 binding; GO:0042803 protein homodimerization activity; GO:0008017 microtubule binding; G…
D3ZYD7	1056	0.82	Down	0.041845	S	Coiled coil domain-containing 88A OS=Rattus norvegicus OX=10116 GN=Ccdc88a PE=1 SV=3	Ccdc88a	0.985845	0.00011994	102.52	S(0.986)LT(0.009)LT(0.004)PT(0.001)R	2	0.30691	3	0.792469	0.931864	0.964139	1.07084	1.04724	1.16139	nucleus	GO:0044700 single organism signaling; GO:0044085 cellular component biogenesis; GO:0097581 lamellipodium organization; GO:0032270 positive regulation of cellular protein metabolic process; GO:0051674 localization of cell; GO:0060491 regulation of cell projection assembly; GO:0048869 cellular developmental process; GO:0022008 neurogenesis; GO:0044699 single-organism process; GO:1902115 regulation …	GO:0016020 membrane; GO:0005783 endoplasmic reticulum; GO:0044450 microtubule organizing center part; GO:0031410 cytoplasmic vesicle; GO:0071944 cell periphery; GO:0031982 vesicle; GO:0005737 cytoplasm; GO:0044424 intracellular part; GO:0005623 cell; GO:0044422 organelle part; GO:0043228 non-membrane-bounded organelle; GO:0005856 cytoskeleton; GO:0005815 microtubule organizing center; GO:0015630 …	GO:0043167 ion binding; GO:0046983 protein dimerization activity; GO:0019901 protein kinase binding; GO:0015631 tubulin binding; GO:0005515 protein binding; GO:0019900 kinase binding; GO:0043422 protein kinase B binding; GO:0042802 identical protein binding; GO:0008092 cytoskeletal protein binding; GO:0005488 binding; GO:0042803 protein homodimerization activity; GO:0008017 microtubule binding; G…
D3ZZW1	1756	0.772	Down	0.0075183	S	Dedicator of cyto-kinesis 1 OS=Rattus norvegicus OX=10116 GN=Dock1 PE=1 SV=1	Dock1	0.750506	4.46564e-25	158.61	RFS(0.751)VS(0.249)PASPCSQPTPPPVTPR	3	1.882	1	0.83871	0.840328	0.885827	1.21033	1.08269	1.02824	nucleus	GO:0050794 regulation of cellular process; GO:0044700 single organism signaling; GO:0016043 cellular component organization; GO:0044707 single-multicellular organism process; GO:0016477 cell migration; GO:0051674 localization of cell; GO:0048869 cellular developmental process; GO:0044699 single-organism process; GO:0050896 response to stimulus; GO:0007165 signal transduction; GO:0030154 cell diff…	GO:0005623 cell; GO:0005622 intracellular; GO:0044464 cell part;	GO:0030234 enzyme regulator activity; GO:0005085 guanyl-nucleotide exchange factor activity; GO:0060589 nucleoside-triphosphatase regulator activity; GO:0005488 binding; GO:0030695 GTPase regulator activity; GO:0005515 protein binding; GO:0098772 molecular function regulator; GO:0008047 enzyme activator activity; GO:0005096 GTPase activator activity;	K13708	DOCK1; dedicator of cytokinesis protein 1	rno04510 Focal adhesion - Rattus norvegicus (rat); rno04810 Regulation of actin cytoskeleton - Rattus norvegicus (rat); rno05100 Bacterial invasion of epithelial cells - Rattus norvegicus (rat);	IPR001452; IPR010703; IPR027357; IPR027007; IPR016024; IPR032376;	SH3 domain; Dedicator of cytokinesis, C-terminal; DHR-2 domain; DHR-1 domain; Armadillo-type fold; Dedicator of cytokinesis, N-terminal domain;
D3ZZW1	1743	0.767	Down	0.00162266	S	Dedicator of cyto-kinesis 1 OS=Rattus norvegicus OX=10116 GN=Dock1 PE=1 SV=1	Dock1	0.999999	0.000174647	92.996	S(1)QVINVIGSER	2	0.19003	1	0.865927	0.809621	0.875	1.07457	1.08654	1.16456	nucleus	GO:0050794 regulation of cellular process; GO:0044700 single organism signaling; GO:0016043 cellular component organization; GO:0044707 single-multicellular organism process; GO:0016477 cell migration; GO:0051674 localization of cell; GO:0048869 cellular developmental process; GO:0044699 single-organism process; GO:0050896 response to stimulus; GO:0007165 signal transduction; GO:0030154 cell diff…	GO:0005623 cell; GO:0005622 intracellular; GO:0044464 cell part;	GO:0030234 enzyme regulator activity; GO:0005085 guanyl-nucleotide exchange factor activity; GO:0060589 nucleoside-triphosphatase regulator activity; GO:0005488 binding; GO:0030695 GTPase regulator activity; GO:0005515 protein binding; GO:0098772 molecular function regulator; GO:0008047 enzyme activator activity; GO:0005096 GTPase activator activity;	K13708	DOCK1; dedicator of cytokinesis protein 1	rno04510 Focal adhesion - Rattus norvegicus (rat); rno04810 Regulation of actin cytoskeleton - Rattus norvegicus (rat); rno05100 Bacterial invasion of epithelial cells - Rattus norvegicus (rat);	IPR001452; IPR010703; IPR027357; IPR027007; IPR016024; IPR032376;	SH3 domain; Dedicator of cytokinesis, C-terminal; DHR-2 domain; DHR-1 domain; Armadillo-type fold; Dedicator of cytokinesis, N-terminal domain;
A0A1W2Q695	250	1.359	Up	0.0102163	S	MutS homolog 6 OS=Rattus norvegicus OX=10116 GN=Msh6 PE=1 SV=1	Msh6	1	2.72361e-46	210.22	RVIS(1)DS(1)ES(1)DIGGS(1)DVEFKPDSK	4	-0.48364	10	1.09173	1.29727	1.08392	0.821743	0.828515	0.905528	nucleus	GO:0033554 cellular response to stress; GO:0051716 cellular response to stimulus; GO:0006725 cellular aromatic compound metabolic process; GO:0006950 response to stress; GO:0006259 DNA metabolic process; GO:1901360 organic cyclic compound metabolic process; GO:0006807 nitrogen compound metabolic process; GO:0044238 primary metabolic process; GO:0050896 response to stimulus; GO:0044237 cellular me…		GO:0003677 DNA binding; GO:0005524 ATP binding; GO:1901265 nucleoside phosphate binding; GO:0003690 double-stranded DNA binding; GO:0001882 nucleoside binding; GO:0043167 ion binding; GO:0000166 nucleotide binding; GO:0097159 organic cyclic compound binding; GO:1901363 heterocyclic compound binding; GO:0032549 ribonucleoside binding; GO:0097367 carbohydrate derivative binding; GO:0030983 mismatch…	K08737	MSH6; DNA mismatch repair protein MSH6	rno01524 Platinum drug resistance - Rattus norvegicus (rat); rno03430 Mismatch repair - Rattus norvegicus (rat); rno05200 Pathways in cancer - Rattus norvegicus (rat); rno05210 Colorectal cancer - Rattus norvegicus (rat);	IPR007861; IPR007860; IPR007696; IPR027417; IPR007695; IPR016151; IPR000432; IPR000313;	DNA mismatch repair protein MutS, clamp; DNA mismatch repair protein MutS, connector domain; DNA mismatch repair protein MutS, core; P-loop containing nucleoside triphosphate hydrolase; DNA mismatch repair protein MutS-like, N-terminal; DNA mismatch repair protein MutS, N-terminal; DNA mismatch repair protein MutS, C-terminal; PWWP domain;
D3ZI68	450	0.586	Down	0.0178827	S	PRP31 pre-mRNA processing factor 31 homolog (Yeast) (Predicted) OS=Rattus norvegicus OX=10116 GN=Prpf31 PE=1 SV=1	Prpf31	0.794262	2.92097e-69	232.37	S(0.006)S(0.006)GT(0.026)AS(0.794)S(0.168)VAFT(1)PLQGLEIVNPQAAEK	5	-0.22819	5	0.802775	0.734375	0.661568	1.5707	1.10516	1.07357	nucleus	GO:0044085 cellular component biogenesis; GO:0016043 cellular component organization; GO:0022613 ribonucleoprotein complex biogenesis; GO:0022618 ribonucleoprotein complex assembly; GO:0006725 cellular aromatic compound metabolic process; GO:0044237 cellular metabolic process; GO:0071704 organic substance metabolic process; GO:0000398 mRNA splicing, via spliceosome; GO:0008152 metabolic process; …	GO:0032991 macromolecular complex; GO:0044424 intracellular part; GO:0016604 nuclear body; GO:0005623 cell; GO:0015030 Cajal body; GO:0071011 precatalytic spliceosome; GO:0044422 organelle part; GO:0031974 membrane-enclosed lumen; GO:0097526 spliceosomal tri-snRNP complex; GO:1902494 catalytic complex; GO:0005654 nucleoplasm; GO:0070013 intracellular organelle lumen; GO:0016607 nuclear speck; GO:…	GO:0097159 organic cyclic compound binding; GO:1901363 heterocyclic compound binding; GO:0070990 snRNP binding; GO:0003723 RNA binding; GO:0030622 U4atac snRNA binding; GO:0005488 binding; GO:0030621 U4 snRNA binding; GO:0003676 nucleic acid binding; GO:0044877 macromolecular complex binding; GO:0017069 snRNA binding; GO:0043021 ribonucleoprotein complex binding;	K12844	PRPF31; U4/U6 small nuclear ribonucleoprotein PRP31	rno03040 Spliceosome - Rattus norvegicus (rat);	IPR002687; IPR012976; IPR019175;	Nop domain; NOSIC; Prp31 C-terminal;
G3V9M3	344	0.686	Down	0.0057764	S	RCG28460 OS=Rattus norvegicus OX=10116 GN=Wdr47 PE=1 SV=1	Wdr47	0.914293	0.00295141	57.902	T(0.011)S(0.011)PMS(0.063)HS(0.914)FANFHYPGVQNLSR	4	0.11813	2	0.855521	0.831041	0.740668	1.09552	1.13327	1.30707	nucleus			GO:0005515 protein binding; GO:0005488 binding;				IPR017986; IPR015943; IPR006595; IPR006594; IPR024977;	WD40-repeat-containing domain; WD40/YVTN repeat-like-containing domain; CTLH, C-terminal LisH motif; LIS1 homology motif; Anaphase-promoting complex subunit 4, WD40 domain;
P59215	159	1.312	Up	0.026277	S	Guanine nucleotide-binding protein G(o) subunit alpha OS=Rattus norvegicus OX=10116 GN=Gnao1 PE=1 SV=2	Gnao1	0.999989	0.00154968	83.081	YYLDS(1)LDR	2	0.99707	1	0.987141	1.25803	1.18891	0.869347	0.912659	0.835366	mitochondria	GO:0044700 single organism signaling; GO:0007420 brain development; GO:0048666 neuron development; GO:0048869 cellular developmental process; GO:0022008 neurogenesis; GO:0044699 single-organism process; GO:0007610 behavior; GO:0007165 signal transduction; GO:0007154 cell communication; GO:0032879 regulation of localization; GO:0044093 positive regulation of molecular function; GO:0006979 response…	GO:0016020 membrane; GO:0030425 dendrite; GO:1905360 GTPase complex; GO:0042995 cell projection; GO:0019898 extrinsic component of membrane; GO:0071944 cell periphery; GO:0098796 membrane protein complex; GO:0098797 plasma membrane protein complex; GO:0019897 extrinsic component of plasma membrane; GO:0032991 macromolecular complex; GO:0044424 intracellular part; GO:0031234 extrinsic component of…	GO:0051429 corticotropin-releasing hormone receptor binding; GO:1901265 nucleoside phosphate binding; GO:0005102 receptor binding; GO:0031683 G-protein beta/gamma-subunit complex binding; GO:0016817 hydrolase activity, acting on acid anhydrides; GO:0016787 hydrolase activity; GO:0005515 protein binding; GO:0051427 hormone receptor binding; GO:0004871 signal transducer activity; GO:0032794 GTPase …	K04534	GNAO, G-ALPHA-O; guanine nucleotide-binding protein G(o) subunit alpha	rno04015 Rap1 signaling pathway - Rattus norvegicus (rat); rno04713 Circadian entrainment - Rattus norvegicus (rat); rno04723 Retrograde endocannabinoid signaling - Rattus norvegicus (rat); rno04724 Glutamatergic synapse - Rattus norvegicus (rat); rno04725 Cholinergic synapse - Rattus norvegicus (rat); rno04726 Serotonergic synapse - Rattus norvegicus (rat); rno04727 GABAergic synapse - Rattus no…	IPR027417; IPR011025;	P-loop containing nucleoside triphosphate hydrolase; G protein alpha subunit, helical insertion;
F1M8Y4	299	0.748	Down	0.009617	S	DEP domain-containing MTOR-interacting protein OS=Rattus norvegicus OX=10116 GN=Deptor PE=1 SV=2	Deptor	0.818889	1.50978e-35	176.08	RS(0.475)S(0.493)MS(0.014)S(0.016)CGS(0.001)SGYFS(0.001)S(0.016)S(0.003)PT(0.002)LS(0.007)S(0.151)S(0.819)PPVLCNPK	4	-1.1729	1	0.785228	0.81105	0.953603	1.10049	1.17619	1.13294	nucleus	GO:0044700 single organism signaling; GO:0065008 regulation of biological quality; GO:0010941 regulation of cell death; GO:0009968 negative regulation of signal transduction; GO:0023051 regulation of signaling; GO:0044699 single-organism process; GO:0031400 negative regulation of protein modification process; GO:2001233 regulation of apoptotic signaling pathway; GO:0007165 signal transduction; GO…	GO:0044424 intracellular part; GO:0005623 cell; GO:0005622 intracellular; GO:0044464 cell part; GO:0005737 cytoplasm;	GO:0005515 protein binding; GO:0005488 binding;	K20402	DEPTOR; DEP domain-containing mTOR-interacting protein	rno04140 Autophagy - animal - Rattus norvegicus (rat); rno04150 mTOR signaling pathway - Rattus norvegicus (rat);	IPR011991; IPR001478; IPR000591;	Winged helix-turn-helix DNA-binding domain; PDZ domain; DEP domain;
F1M8Y4	244	0.571	Down	0.036364	S	DEP domain-containing MTOR-interacting protein OS=Rattus norvegicus OX=10116 GN=Deptor PE=1 SV=2	Deptor	0.993456	1.273e-21	176.1	SPSSQET(0.007)HDS(0.993)PFCLR	3	-0.1024	1	0.54033	0.641989	0.977295	1.3922	1.28945	1.09722	nucleus	GO:0044700 single organism signaling; GO:0065008 regulation of biological quality; GO:0010941 regulation of cell death; GO:0009968 negative regulation of signal transduction; GO:0023051 regulation of signaling; GO:0044699 single-organism process; GO:0031400 negative regulation of protein modification process; GO:2001233 regulation of apoptotic signaling pathway; GO:0007165 signal transduction; GO…	GO:0044424 intracellular part; GO:0005623 cell; GO:0005622 intracellular; GO:0044464 cell part; GO:0005737 cytoplasm;	GO:0005515 protein binding; GO:0005488 binding;	K20402	DEPTOR; DEP domain-containing mTOR-interacting protein	rno04140 Autophagy - animal - Rattus norvegicus (rat); rno04150 mTOR signaling pathway - Rattus norvegicus (rat);	IPR011991; IPR001478; IPR000591;	Winged helix-turn-helix DNA-binding domain; PDZ domain; DEP domain;
O54701	385	0.73	Down	0.021896	S	Sodium/potassium/calcium exchanger 2 OS=Rattus norvegicus OX=10116 GN=Slc24a2 PE=1 SV=1	Slc24a2	1	0.0211921	45.829	EKAS(1)ILHK	4	0.43356	2	0.745562	0.954762	0.809051	1.15515	1.0471	1.23657	plasma membrane	GO:0065008 regulation of biological quality; GO:0072503 cellular divalent inorganic cation homeostasis; GO:0007601 visual perception; GO:0023051 regulation of signaling; GO:0044699 single-organism process; GO:0060292 long term synaptic depression; GO:0050877 neurological system process; GO:0051234 establishment of localization; GO:0007610 behavior; GO:0006813 potassium ion transport; GO:0050806 p…	GO:0016020 membrane; GO:0031226 intrinsic component of plasma membrane; GO:0044459 plasma membrane part; GO:0044425 membrane part; GO:0044464 cell part; GO:0071944 cell periphery; GO:0031224 intrinsic component of membrane; GO:0005887 integral component of plasma membrane; GO:0005623 cell; GO:0016021 integral component of membrane; GO:0005886 plasma membrane;	GO:0031402 sodium ion binding; GO:0022803 passive transmembrane transporter activity; GO:0046983 protein dimerization activity; GO:0030955 potassium ion binding; GO:0022892 substrate-specific transporter activity; GO:0015077 monovalent inorganic cation transmembrane transporter activity; GO:0005515 protein binding; GO:0015267 channel activity; GO:0015297 antiporter activity; GO:0099516 ion antipo…	K13750	SLC24A2, NCKX2; solute carrier family 24 (sodium/potassium/calcium exchanger), member 2		IPR004837;	Sodium/calcium exchanger membrane region;
Q64350	539	1.283	Up	0.023778	S	Translation initiation factor eIF-2B subunit epsilon OS=Rattus norvegicus OX=10116 GN=Eif2b5 PE=1 SV=2	Eif2b5	1	3.07055e-05	122.97	AGS(1)PQLDDIR	2	0.18739	2	1.10785	1.23566	1.03407	0.950991	0.807471	0.873156	mitochondria	GO:0010941 regulation of cell death; GO:0006518 peptide metabolic process; GO:0032270 positive regulation of cellular protein metabolic process; GO:0021766 hippocampus development; GO:0022414 reproductive process; GO:0007272 ensheathment of neurons; GO:0010608 posttranscriptional regulation of gene expression; GO:0007420 brain development; GO:0009891 positive regulation of biosynthetic process; G…	GO:0043229 intracellular organelle; GO:0005737 cytoplasm; GO:0032991 macromolecular complex; GO:0044424 intracellular part; GO:0005623 cell; GO:0005829 cytosol; GO:0043231 intracellular membrane-bounded organelle; GO:0043226 organelle; GO:0005634 nucleus; GO:0005622 intracellular; GO:0044464 cell part; GO:0043227 membrane-bounded organelle; GO:0005851 eukaryotic translation initiation factor 2B c…	GO:0097159 organic cyclic compound binding; GO:1901363 heterocyclic compound binding; GO:0003723 RNA binding; GO:0008135 translation factor activity, RNA binding; GO:0005085 guanyl-nucleotide exchange factor activity; GO:0031369 translation initiation factor binding; GO:0005488 binding; GO:0003676 nucleic acid binding; GO:0003743 translation initiation factor activity; GO:0005515 protein binding;…	K03240	EIF2B5; translation initiation factor eIF-2B subunit epsilon	rno03013 RNA transport - Rattus norvegicus (rat); rno05168 Herpes simplex virus 1 infection - Rattus norvegicus (rat);	IPR011004; IPR003307; IPR029044; IPR016024; IPR016021;	Trimeric LpxA-like; W2 domain; Nucleotide-diphospho-sugar transferases; Armadillo-type fold; MIF4G-like domain;
M0R9Z5	301	0.587	Down	0.047978	S	Interferon regulatory factor 2-binding protein 2 OS=Rattus norvegicus OX=10116 GN=Irf2bp2 PE=1 SV=1	Irf2bp2	0.999994	1.14713e-24	160.12	DTLLALHHQHGHS(1)GPFESK	5	0.45286	1	0.642276	0.726263	0.915323	1.71326	1.06468	1.10997	nucleus		GO:0043229 intracellular organelle; GO:0044446 intracellular organelle part; GO:0031981 nuclear lumen; GO:0044424 intracellular part; GO:0005623 cell; GO:0044422 organelle part; GO:0043226 organelle; GO:0043231 intracellular membrane-bounded organelle; GO:0031974 membrane-enclosed lumen; GO:0005654 nucleoplasm; GO:0005634 nucleus; GO:0070013 intracellular organelle lumen; GO:0044464 cell part; GO…		K22383			IPR022750;	Interferon regulatory factor 2-binding protein 1 & 2, zinc finger;
Q5HZA4	23	0.716	Down	0.0067007	S	LysM and putative peptidoglycan-binding domain-containing protein 1 OS=Rattus norvegicus OX=10116 GN=Lysmd1 PE=1 SV=1	Lysmd1	0.999997	2.11397e-26	189.87	S(1)YGSLVQSSCSPVR	2	-0.20505	2	0.893281	0.73151	0.864286	1.13232	1.13567	1.20909	mitochondria							IPR018392;	LysM domain;
D4A720	163	1.228	Up	0.046542	S	RCG61762, isoform CRA_d OS=Rattus norvegicus OX=10116 GN=Srsf7 PE=1 SV=1	Srsf7	0.999309	0.0133482	51.135	RS(0.999)RS(0.976)VS(0.025)LR	3	0.84441	1	1.11445	1.15152	1.0176	0.784069	0.932419	0.958333	nucleus	GO:0050794 regulation of cellular process; GO:0006725 cellular aromatic compound metabolic process; GO:0060255 regulation of macromolecule metabolic process; GO:0019219 regulation of nucleobase-containing compound metabolic process; GO:0050686 negative regulation of mRNA processing; GO:0048519 negative regulation of biological process; GO:0031324 negative regulation of cellular metabolic process;…	GO:0043229 intracellular organelle; GO:0044421 extracellular region part; GO:0044446 intracellular organelle part; GO:0031982 vesicle; GO:0031981 nuclear lumen; GO:0044424 intracellular part; GO:0005623 cell; GO:0005576 extracellular region; GO:0044422 organelle part; GO:0031974 membrane-enclosed lumen; GO:0043226 organelle; GO:0070062 extracellular exosome; GO:0043231 intracellular membrane-boun…	GO:0097159 organic cyclic compound binding; GO:1901363 heterocyclic compound binding; GO:0003723 RNA binding; GO:1901265 nucleoside phosphate binding; GO:0046914 transition metal ion binding; GO:0005488 binding; GO:0043167 ion binding; GO:0003676 nucleic acid binding; GO:0043169 cation binding; GO:0046872 metal ion binding; GO:0000166 nucleotide binding; GO:0008270 zinc ion binding; GO:0036094 sm…	K12896	SFRS7; splicing factor, arginine/serine-rich 7	rno03040 Spliceosome - Rattus norvegicus (rat); rno05168 Herpes simplex virus 1 infection - Rattus norvegicus (rat);	IPR000504; IPR012677; IPR001878;	RNA recognition motif domain; Nucleotide-binding alpha-beta plait domain; Zinc finger, CCHC-type;
D4A720	187	0.756	Down	0.032803	S	RCG61762, isoform CRA_d OS=Rattus norvegicus OX=10116 GN=Srsf7 PE=1 SV=1	Srsf7	1	0.000522369	76.23	S(1)RS(1)GS(1)IIGS(1)R	2	-0.26678	1	0.920466	0.920202	0.711633	1.16603	1.14006	1.07083	nucleus	GO:0050794 regulation of cellular process; GO:0006725 cellular aromatic compound metabolic process; GO:0060255 regulation of macromolecule metabolic process; GO:0019219 regulation of nucleobase-containing compound metabolic process; GO:0050686 negative regulation of mRNA processing; GO:0048519 negative regulation of biological process; GO:0031324 negative regulation of cellular metabolic process;…	GO:0043229 intracellular organelle; GO:0044421 extracellular region part; GO:0044446 intracellular organelle part; GO:0031982 vesicle; GO:0031981 nuclear lumen; GO:0044424 intracellular part; GO:0005623 cell; GO:0005576 extracellular region; GO:0044422 organelle part; GO:0031974 membrane-enclosed lumen; GO:0043226 organelle; GO:0070062 extracellular exosome; GO:0043231 intracellular membrane-boun…	GO:0097159 organic cyclic compound binding; GO:1901363 heterocyclic compound binding; GO:0003723 RNA binding; GO:1901265 nucleoside phosphate binding; GO:0046914 transition metal ion binding; GO:0005488 binding; GO:0043167 ion binding; GO:0003676 nucleic acid binding; GO:0043169 cation binding; GO:0046872 metal ion binding; GO:0000166 nucleotide binding; GO:0008270 zinc ion binding; GO:0036094 sm…	K12896	SFRS7; splicing factor, arginine/serine-rich 7	rno03040 Spliceosome - Rattus norvegicus (rat); rno05168 Herpes simplex virus 1 infection - Rattus norvegicus (rat);	IPR000504; IPR012677; IPR001878;	RNA recognition motif domain; Nucleotide-binding alpha-beta plait domain; Zinc finger, CCHC-type;
D4A5X1	28	0.68	Down	0.03182	S	Stromal interaction molecule 2 OS=Rattus norvegicus OX=10116 GN=Stim2 PE=1 SV=2	Stim2	0.998007	3.30242e-37	199.31	RAS(0.998)GS(0.002)AGAAASPSAAAAGER	2	0.0057219	3	0.922846	0.754302	0.773245	1.10611	1.05136	1.44491	plasma membrane	GO:0065008 regulation of biological quality; GO:0072503 cellular divalent inorganic cation homeostasis; GO:0072511 divalent inorganic cation transport; GO:0034764 positive regulation of transmembrane transport; GO:0032411 positive regulation of transporter activity; GO:0030001 metal ion transport; GO:0030003 cellular cation homeostasis; GO:0044699 single-organism process; GO:1901341 positive regu…	GO:0016020 membrane; GO:0043229 intracellular organelle; GO:0005783 endoplasmic reticulum; GO:0071944 cell periphery; GO:0005737 cytoplasm; GO:0012505 endomembrane system; GO:0044424 intracellular part; GO:0005623 cell; GO:0005886 plasma membrane; GO:0043231 intracellular membrane-bounded organelle; GO:0043226 organelle; GO:0005622 intracellular; GO:0044464 cell part; GO:0043227 membrane-bounded …	GO:0016247 channel regulator activity; GO:0005488 binding; GO:0043167 ion binding; GO:0099106 ion channel regulator activity; GO:0046872 metal ion binding; GO:0043169 cation binding; GO:0005515 protein binding; GO:0005509 calcium ion binding; GO:0005246 calcium channel regulator activity; GO:0098772 molecular function regulator;	K18196	STIM2; stromal interaction molecule 2	rno04020 Calcium signaling pathway - Rattus norvegicus (rat);	IPR013761; IPR001660; IPR032393;	Sterile alpha motif/pointed domain; Sterile alpha motif domain; Stromal interaction molecule, Orai1-activating region;
D4A5X1	716	0.674	Down	0.00085533	S	Stromal interaction molecule 2 OS=Rattus norvegicus OX=10116 GN=Stim2 PE=1 SV=2	Stim2	1	3.67815e-21	170.16	VGS(1)IPHDLCHNGEK	4	-0.21088	9	0.829659	0.751434	0.857685	1.22508	1.23162	1.16055	plasma membrane	GO:0065008 regulation of biological quality; GO:0072503 cellular divalent inorganic cation homeostasis; GO:0072511 divalent inorganic cation transport; GO:0034764 positive regulation of transmembrane transport; GO:0032411 positive regulation of transporter activity; GO:0030001 metal ion transport; GO:0030003 cellular cation homeostasis; GO:0044699 single-organism process; GO:1901341 positive regu…	GO:0016020 membrane; GO:0043229 intracellular organelle; GO:0005783 endoplasmic reticulum; GO:0071944 cell periphery; GO:0005737 cytoplasm; GO:0012505 endomembrane system; GO:0044424 intracellular part; GO:0005623 cell; GO:0005886 plasma membrane; GO:0043231 intracellular membrane-bounded organelle; GO:0043226 organelle; GO:0005622 intracellular; GO:0044464 cell part; GO:0043227 membrane-bounded …	GO:0016247 channel regulator activity; GO:0005488 binding; GO:0043167 ion binding; GO:0099106 ion channel regulator activity; GO:0046872 metal ion binding; GO:0043169 cation binding; GO:0005515 protein binding; GO:0005509 calcium ion binding; GO:0005246 calcium channel regulator activity; GO:0098772 molecular function regulator;	K18196	STIM2; stromal interaction molecule 2	rno04020 Calcium signaling pathway - Rattus norvegicus (rat);	IPR013761; IPR001660; IPR032393;	Sterile alpha motif/pointed domain; Sterile alpha motif domain; Stromal interaction molecule, Orai1-activating region;
D4A5X1	658	0.579	Down	0.0035804	S	Stromal interaction molecule 2 OS=Rattus norvegicus OX=10116 GN=Stim2 PE=1 SV=2	Stim2	0.996157	0.000718647	87.241	S(0.996)MIFS(0.002)PAS(0.002)R	2	-0.46894	1	0.826653	0.655832	0.744782	1.35584	1.35448	1.13536	plasma membrane	GO:0065008 regulation of biological quality; GO:0072503 cellular divalent inorganic cation homeostasis; GO:0072511 divalent inorganic cation transport; GO:0034764 positive regulation of transmembrane transport; GO:0032411 positive regulation of transporter activity; GO:0030001 metal ion transport; GO:0030003 cellular cation homeostasis; GO:0044699 single-organism process; GO:1901341 positive regu…	GO:0016020 membrane; GO:0043229 intracellular organelle; GO:0005783 endoplasmic reticulum; GO:0071944 cell periphery; GO:0005737 cytoplasm; GO:0012505 endomembrane system; GO:0044424 intracellular part; GO:0005623 cell; GO:0005886 plasma membrane; GO:0043231 intracellular membrane-bounded organelle; GO:0043226 organelle; GO:0005622 intracellular; GO:0044464 cell part; GO:0043227 membrane-bounded …	GO:0016247 channel regulator activity; GO:0005488 binding; GO:0043167 ion binding; GO:0099106 ion channel regulator activity; GO:0046872 metal ion binding; GO:0043169 cation binding; GO:0005515 protein binding; GO:0005509 calcium ion binding; GO:0005246 calcium channel regulator activity; GO:0098772 molecular function regulator;	K18196	STIM2; stromal interaction molecule 2	rno04020 Calcium signaling pathway - Rattus norvegicus (rat);	IPR013761; IPR001660; IPR032393;	Sterile alpha motif/pointed domain; Sterile alpha motif domain; Stromal interaction molecule, Orai1-activating region;
F1LVA9	1765	0.811	Down	0.047442	S	Dedicator of cytokinesis 5 OS=Rattus norvegicus OX=10116 GN=Dock5 PE=1 SV=2	Dock5	0.999999	0.000568656	113.24	S(1)LQLVDSR	2	0.037493	2	0.853348	0.848671	0.976119	1.21298	0.993402	1.09538	nucleus	GO:0044700 single organism signaling; GO:0030335 positive regulation of cell migration; GO:0065008 regulation of biological quality; GO:0040017 positive regulation of locomotion; GO:0045906 negative regulation of vasoconstriction; GO:0044699 single-organism process; GO:0051241 negative regulation of multicellular organismal process; GO:0051130 positive regulation of cellular component organizatio…	GO:0016020 membrane; GO:0071944 cell periphery; GO:0044464 cell part; GO:0005622 intracellular; GO:0005737 cytoplasm; GO:0044424 intracellular part; GO:0005623 cell; GO:0005829 cytosol; GO:0005886 plasma membrane; GO:0044444 cytoplasmic part;	GO:0005515 protein binding; GO:0098772 molecular function regulator; GO:0005085 guanyl-nucleotide exchange factor activity; GO:0005488 binding;	K17707	DOCK5; dedicator of cytokinesis protein 5		IPR001452; IPR027357; IPR010703; IPR027007; IPR016024; IPR032376;	SH3 domain; DHR-2 domain; Dedicator of cytokinesis, C-terminal; DHR-1 domain; Armadillo-type fold; Dedicator of cytokinesis, N-terminal domain;
B5DEG7	394	1.277	Up	0.021055	S	Chromosome alignment maintaining phosphoprotein 1 OS=Rattus norvegicus OX=10116 GN=Champ1 PE=1 SV=1	Champ1	0.999999	5.12026e-06	119.87	TALPLS(1)PEHWK	3	-0.066404	1	1.17431	1.08047	1.143	0.77998	0.931683	0.949011	nucleus	GO:0034502 protein localization to chromosome; GO:0051640 organelle localization; GO:0016043 cellular component organization; GO:0071459 protein localization to chromosome, centromeric region; GO:0048285 organelle fission; GO:0007067 mitotic nuclear division; GO:0044699 single-organism process; GO:0007080 mitotic metaphase plate congression; GO:0051310 metaphase plate congression; GO:1903047 mito…	GO:0032991 macromolecular complex; GO:0044424 intracellular part; GO:0016604 nuclear body; GO:0005623 cell; GO:0000777 condensed chromosome kinetochore; GO:0044422 organelle part; GO:0044427 chromosomal part; GO:0043228 non-membrane-bounded organelle; GO:0005856 cytoskeleton; GO:0000793 condensed chromosome; GO:0031974 membrane-enclosed lumen; GO:0005654 nucleoplasm; GO:0070013 intracellular orga…	GO:0097159 organic cyclic compound binding; GO:1901363 heterocyclic compound binding; GO:0005488 binding; GO:0043167 ion binding; GO:0003676 nucleic acid binding; GO:0043169 cation binding; GO:0046872 metal ion binding;	K22593			IPR015880; IPR007087; IPR013087;	Zinc finger, C2H2-like; Zinc finger, C2H2; Zinc finger C2H2-type/integrase DNA-binding domain;
D3ZH34	62	1.326	Up	0.0035226	S	Terminal nucleotidyltransferase 5A OS=Rattus norvegicus OX=10116 GN=Tent5a PE=4 SV=1	Tent5a	0.965674	8.30069e-44	200.74	CSDYCES(0.966)PT(0.034)AHCNVLNWEQVQR	3	-0.74699	2	1.17717	1.14242	1.13265	0.801491	0.935417	0.866545	cytoplasm	GO:0050818 regulation of coagulation; GO:0010468 regulation of gene expression; GO:0065008 regulation of biological quality; GO:0050789 regulation of biological process; GO:0050878 regulation of body fluid levels; GO:0061041 regulation of wound healing; GO:0060255 regulation of macromolecule metabolic process; GO:0048583 regulation of response to stimulus; GO:1900046 regulation of hemostasis; GO:…		GO:0097159 organic cyclic compound binding; GO:1901363 heterocyclic compound binding; GO:0003723 RNA binding; GO:0005488 binding; GO:0003676 nucleic acid binding;	K23033			IPR012937;	FAM46 family;
F1LTW9	212	0.792	Down	0.026045	S	EFR3 homolog B OS=Rattus norvegicus OX=10116 GN=Efr3b PE=1 SV=2	Efr3b	0.87581	4.03259e-07	95.993	IVPSLLFNLQHVEEAES(0.876)RS(0.658)PS(0.466)PLQAPEK	4	0.3838	2	0.950287	0.89049	0.782908	1.18821	1.06429	1.06018	cytoplasm	GO:0016310 phosphorylation; GO:0016043 cellular component organization; GO:0010256 endomembrane system organization; GO:0046486 glycerolipid metabolic process; GO:0046854 phosphatidylinositol phosphorylation; GO:0090002 establishment of protein localization to plasma membrane; GO:0044699 single-organism process; GO:0044255 cellular lipid metabolic process; GO:0044237 cellular metabolic process; G…	GO:0016020 membrane; GO:0005623 cell; GO:0044464 cell part; GO:0071944 cell periphery; GO:0005886 plasma membrane;	GO:0005488 binding;	K21842	EFR3; protein EFR3		IPR011989; IPR016024;	Armadillo-like helical; Armadillo-type fold;
F1LTW9	689	0.719	Down	0.0102832	S	EFR3 homolog B OS=Rattus norvegicus OX=10116 GN=Efr3b PE=1 SV=2	Efr3b	1	2.86071e-48	236.04	LCLPYIPQLTDEDRLS(1)K	3	-1.0253	2	0.780115	0.777137	0.929273	1.21303	1.18497	1.05817	cytoplasm	GO:0016310 phosphorylation; GO:0016043 cellular component organization; GO:0010256 endomembrane system organization; GO:0046486 glycerolipid metabolic process; GO:0046854 phosphatidylinositol phosphorylation; GO:0090002 establishment of protein localization to plasma membrane; GO:0044699 single-organism process; GO:0044255 cellular lipid metabolic process; GO:0044237 cellular metabolic process; G…	GO:0016020 membrane; GO:0005623 cell; GO:0044464 cell part; GO:0071944 cell periphery; GO:0005886 plasma membrane;	GO:0005488 binding;	K21842	EFR3; protein EFR3		IPR011989; IPR016024;	Armadillo-like helical; Armadillo-type fold;
Q66H54	679	0.733	Down	0.00138401	S	FTS and Hook-interacting protein OS=Rattus norvegicus OX=10116 GN=Fam160a2 PE=1 SV=1	Fam160a2	1	8.14374e-05	106.3	RPS(1)LGELLLR	3	-0.25351	2	0.871227	0.864529	0.79281	1.10091	1.20121	1.14752	nucleus	GO:0007041 lysosomal transport; GO:0045022 early endosome to late endosome transport; GO:0016043 cellular component organization; GO:0046907 intracellular transport; GO:0010256 endomembrane system organization; GO:0016192 vesicle-mediated transport; GO:0016050 vesicle organization; GO:0071702 organic substance transport; GO:0008333 endosome to lysosome transport; GO:0015031 protein transport; GO:…	GO:0044464 cell part; GO:0005622 intracellular; GO:0005737 cytoplasm; GO:0032991 macromolecular complex; GO:0044424 intracellular part; GO:0070695 FHF complex; GO:0005829 cytosol; GO:0043234 protein complex; GO:0005623 cell; GO:0044444 cytoplasmic part;
P49806	10	0.651	Down	0.0161428	S	Regulator of G-protein signaling 10 OS=Rattus norvegicus OX=10116 GN=Rgs10 PE=1 SV=2	Rgs10	0.999952	0.0120879	58.433	AVSRLS(1)R	3	0.069734	1	0.760355	0.664622	0.921305	1.08087	1.29611	1.22903	nucleus	GO:0050794 regulation of cellular process; GO:0044700 single organism signaling; GO:0009968 negative regulation of signal transduction; GO:0023051 regulation of signaling; GO:1901700 response to oxygen-containing compound; GO:0044699 single-organism process; GO:0048519 negative regulation of biological process; GO:0048523 negative regulation of cellular process; GO:0050896 response to stimulus; G…	GO:0016020 membrane; GO:0030425 dendrite; GO:0071944 cell periphery; GO:0005737 cytoplasm; GO:0043025 neuronal cell body; GO:0044424 intracellular part; GO:0005623 cell; GO:0043197 dendritic spine; GO:0043679 axon terminus; GO:0044309 neuron spine; GO:0098793 presynapse; GO:0005622 intracellular; GO:0044464 cell part; GO:0043005 neuron projection; GO:0044306 neuron projection terminus; GO:0043227…	GO:0030234 enzyme regulator activity; GO:0060589 nucleoside-triphosphatase regulator activity; GO:0005488 binding; GO:0030695 GTPase regulator activity; GO:0005515 protein binding; GO:0001965 G-protein alpha-subunit binding; GO:0098772 molecular function regulator; GO:0008047 enzyme activator activity; GO:0005096 GTPase activator activity;	K16449	RGS; regulator of G-protein signaling		IPR024066; IPR016137;	RGS, subdomain 1; RGS domain;
Q53AQ4	126	1.204	Up	0.0104583	S	Transmembrane and ubiquitin-like domain-containing protein 1 OS=Rattus norvegicus OX=10116 GN=Tmub1 PE=1 SV=1	Tmub1	0.999997	2.74379e-07	129.38	AWPQDTIGS(1)LKR	3	-0.04205	1	1.11051	1.11971	1.06288	0.856178	0.902622	0.975442	plasma membrane	GO:0033554 cellular response to stress; GO:0051603 proteolysis involved in cellular protein catabolic process; GO:0044257 cellular protein catabolic process; GO:0034976 response to endoplasmic reticulum stress; GO:0044267 cellular protein metabolic process; GO:0044699 single-organism process; GO:0036503 ERAD pathway; GO:0050896 response to stimulus; GO:0044237 cellular metabolic process; GO:00104…	GO:0016020 membrane; GO:0031410 cytoplasmic vesicle; GO:0071944 cell periphery; GO:0030054 cell junction; GO:0031982 vesicle; GO:0005737 cytoplasm; GO:0031224 intrinsic component of membrane; GO:0044424 intracellular part; GO:0005623 cell; GO:0044422 organelle part; GO:0055037 recycling endosome; GO:0043228 non-membrane-bounded organelle; GO:0005856 cytoskeleton; GO:0031974 membrane-enclosed lume…	GO:0005515 protein binding; GO:0005488 binding;	K23340			IPR029071; IPR000626;	Ubiquitin-related domain; Ubiquitin domain;
Q5PQX1	245	1.264	Up	0.033235	S	Torsin-1A-interacting protein 1 OS=Rattus norvegicus OX=10116 GN=Tor1aip1 PE=1 SV=1	Tor1aip1	0.966455	4.569e-14	124.41	S(0.27)RDS(0.764)VES(0.966)RDEAAVAAGHHPDSLWGLPHSR	5	0.13673	1	1.19492	1.19715	0.973974	0.847358	0.904762	0.910569	cytoplasm	GO:0016043 cellular component organization; GO:0006997 nucleus organization; GO:0010256 endomembrane system organization; GO:0044763 single-organism cellular process; GO:0044699 single-organism process; GO:0044802 single-organism membrane organization; GO:0051641 cellular localization; GO:0043085 positive regulation of catalytic activity; GO:0006998 nuclear envelope organization; GO:0070727 cellu…	GO:0043229 intracellular organelle; GO:0016020 membrane; GO:0031090 organelle membrane; GO:0005635 nuclear envelope; GO:0044446 intracellular organelle part; GO:0031967 organelle envelope; GO:0031224 intrinsic component of membrane; GO:0012505 endomembrane system; GO:0044424 intracellular part; GO:0005623 cell; GO:0016021 integral component of membrane; GO:0044422 organelle part; GO:0043226 organ…	GO:0001671 ATPase activator activity; GO:0008092 cytoskeletal protein binding; GO:0030234 enzyme regulator activity; GO:0051117 ATPase binding; GO:0005521 lamin binding; GO:0005488 binding; GO:0060589 nucleoside-triphosphatase regulator activity; GO:0005515 protein binding; GO:0060590 ATPase regulator activity; GO:0098772 molecular function regulator; GO:0019899 enzyme binding; GO:0008047 enzyme …	K23001
Q5PQX1	242	1.547	Up	0.028979	S	Torsin-1A-interacting protein 1 OS=Rattus norvegicus OX=10116 GN=Tor1aip1 PE=1 SV=1	Tor1aip1	0.981874	4.569e-14	124.41	S(0.018)RDS(0.982)VESR	2	0.29403	3	1.19898	1.27846	1.1952	0.643836	0.72206	1.00813	cytoplasm	GO:0016043 cellular component organization; GO:0006997 nucleus organization; GO:0010256 endomembrane system organization; GO:0044763 single-organism cellular process; GO:0044699 single-organism process; GO:0044802 single-organism membrane organization; GO:0051641 cellular localization; GO:0043085 positive regulation of catalytic activity; GO:0006998 nuclear envelope organization; GO:0070727 cellu…	GO:0043229 intracellular organelle; GO:0016020 membrane; GO:0031090 organelle membrane; GO:0005635 nuclear envelope; GO:0044446 intracellular organelle part; GO:0031967 organelle envelope; GO:0031224 intrinsic component of membrane; GO:0012505 endomembrane system; GO:0044424 intracellular part; GO:0005623 cell; GO:0016021 integral component of membrane; GO:0044422 organelle part; GO:0043226 organ…	GO:0001671 ATPase activator activity; GO:0008092 cytoskeletal protein binding; GO:0030234 enzyme regulator activity; GO:0051117 ATPase binding; GO:0005521 lamin binding; GO:0005488 binding; GO:0060589 nucleoside-triphosphatase regulator activity; GO:0005515 protein binding; GO:0060590 ATPase regulator activity; GO:0098772 molecular function regulator; GO:0019899 enzyme binding; GO:0008047 enzyme …	K23001
A0A0G2KAI2	876	1.375	Up	0.0003798	S	PHD finger protein 2 OS=Rattus norvegicus OX=10116 GN=Phf2 PE=1 SV=1	Phf2	0.994013	1.08779e-09	141.7	KGS(1)DDAPYS(0.994)PT(0.006)AR	2	-0.58292	6	1.1095	1.1983	1.18249	0.844071	0.823471	0.870874	nucleus	GO:0016577 histone demethylation; GO:0051129 negative regulation of cellular component organization; GO:0009891 positive regulation of biosynthetic process; GO:0044699 single-organism process; GO:0044237 cellular metabolic process; GO:0008214 protein dealkylation; GO:2001141 regulation of RNA biosynthetic process; GO:0008152 metabolic process; GO:0009893 positive regulation of metabolic process; …	GO:0043229 intracellular organelle; GO:0043232 intracellular non-membrane-bounded organelle; GO:0005737 cytoplasm; GO:0044446 intracellular organelle part; GO:0032991 macromolecular complex; GO:0031981 nuclear lumen; GO:0044424 intracellular part; GO:0005730 nucleolus; GO:0005829 cytosol; GO:0005623 cell; GO:0044422 organelle part; GO:0044427 chromosomal part; GO:0043228 non-membrane-bounded orga…	GO:0042393 histone binding; GO:0005506 iron ion binding; GO:0035064 methylated histone binding; GO:0043167 ion binding; GO:0005515 protein binding; GO:0008270 zinc ion binding; GO:0003712 transcription cofactor activity; GO:0032451 demethylase activity; GO:0046914 transition metal ion binding; GO:0003824 catalytic activity; GO:0032452 histone demethylase activity; GO:0005488 binding; GO:0000989 t…	K19414	PHF2, JHDM1E; lysine-specific demethylase PHF2 [EC:1.14.11.-]		IPR003347; IPR013083; IPR011011;	JmjC domain; Zinc finger, RING/FYVE/PHD-type; Zinc finger, FYVE/PHD-type;
A0A0G2KAI2	870	1.216	Up	0.00512	S	PHD finger protein 2 OS=Rattus norvegicus OX=10116 GN=Phf2 PE=1 SV=1	Phf2	1	8.00403e-12	141.7	RKGS(1)DDAPYSPTAR	4	-0.083419	9	1.04554	1.1368	1.11498	0.86648	0.942801	0.902913	nucleus	GO:0016577 histone demethylation; GO:0051129 negative regulation of cellular component organization; GO:0009891 positive regulation of biosynthetic process; GO:0044699 single-organism process; GO:0044237 cellular metabolic process; GO:0008214 protein dealkylation; GO:2001141 regulation of RNA biosynthetic process; GO:0008152 metabolic process; GO:0009893 positive regulation of metabolic process; …	GO:0043229 intracellular organelle; GO:0043232 intracellular non-membrane-bounded organelle; GO:0005737 cytoplasm; GO:0044446 intracellular organelle part; GO:0032991 macromolecular complex; GO:0031981 nuclear lumen; GO:0044424 intracellular part; GO:0005730 nucleolus; GO:0005829 cytosol; GO:0005623 cell; GO:0044422 organelle part; GO:0044427 chromosomal part; GO:0043228 non-membrane-bounded orga…	GO:0042393 histone binding; GO:0005506 iron ion binding; GO:0035064 methylated histone binding; GO:0043167 ion binding; GO:0005515 protein binding; GO:0008270 zinc ion binding; GO:0003712 transcription cofactor activity; GO:0032451 demethylase activity; GO:0046914 transition metal ion binding; GO:0003824 catalytic activity; GO:0032452 histone demethylase activity; GO:0005488 binding; GO:0000989 t…	K19414	PHF2, JHDM1E; lysine-specific demethylase PHF2 [EC:1.14.11.-]		IPR003347; IPR013083; IPR011011;	JmjC domain; Zinc finger, RING/FYVE/PHD-type; Zinc finger, FYVE/PHD-type;
A0A0G2KAI2	678	0.619	Down	0.0028402	S	PHD finger protein 2 OS=Rattus norvegicus OX=10116 GN=Phf2 PE=1 SV=1	Phf2	1	6.95886e-05	117.93	RDLS(1)FLLDK	3	-0.25645	2	0.743217	0.702015	0.808017	1.21569	1.0858	1.33981	nucleus	GO:0016577 histone demethylation; GO:0051129 negative regulation of cellular component organization; GO:0009891 positive regulation of biosynthetic process; GO:0044699 single-organism process; GO:0044237 cellular metabolic process; GO:0008214 protein dealkylation; GO:2001141 regulation of RNA biosynthetic process; GO:0008152 metabolic process; GO:0009893 positive regulation of metabolic process; …	GO:0043229 intracellular organelle; GO:0043232 intracellular non-membrane-bounded organelle; GO:0005737 cytoplasm; GO:0044446 intracellular organelle part; GO:0032991 macromolecular complex; GO:0031981 nuclear lumen; GO:0044424 intracellular part; GO:0005730 nucleolus; GO:0005829 cytosol; GO:0005623 cell; GO:0044422 organelle part; GO:0044427 chromosomal part; GO:0043228 non-membrane-bounded orga…	GO:0042393 histone binding; GO:0005506 iron ion binding; GO:0035064 methylated histone binding; GO:0043167 ion binding; GO:0005515 protein binding; GO:0008270 zinc ion binding; GO:0003712 transcription cofactor activity; GO:0032451 demethylase activity; GO:0046914 transition metal ion binding; GO:0003824 catalytic activity; GO:0032452 histone demethylase activity; GO:0005488 binding; GO:0000989 t…	K19414	PHF2, JHDM1E; lysine-specific demethylase PHF2 [EC:1.14.11.-]		IPR003347; IPR013083; IPR011011;	JmjC domain; Zinc finger, RING/FYVE/PHD-type; Zinc finger, FYVE/PHD-type;
F1MA61	771	0.662	Down	0.0079017	S	Nuclear receptor coactivator OS=Rattus norvegicus OX=10116 GN=Ncoa2 PE=1 SV=3	Ncoa2	0.954876	1.15572e-06	118.21	LDS(0.955)KT(0.045)DPASNTK	3	-0.31432	1	0.818792	0.701942	0.916	1.27561	1.26477	1.14286	nucleus	GO:2000273 positive regulation of receptor activity; GO:1904016 response to Thyroglobulin triiodothyronine; GO:0097659 nucleic acid-templated transcription; GO:0023051 regulation of signaling; GO:0009891 positive regulation of biosynthetic process; GO:0044699 single-organism process; GO:0009058 biosynthetic process; GO:0044237 cellular metabolic process; GO:0051253 negative regulation of RNA meta…	GO:0043229 intracellular organelle; GO:0044446 intracellular organelle part; GO:0005737 cytoplasm; GO:0031981 nuclear lumen; GO:0044424 intracellular part; GO:0016604 nuclear body; GO:0005623 cell; GO:0044422 organelle part; GO:0031974 membrane-enclosed lumen; GO:0043226 organelle; GO:0043231 intracellular membrane-bounded organelle; GO:0005634 nucleus; GO:0005654 nucleoplasm; GO:0070013 intracel…	GO:0030546 receptor activator activity; GO:0005102 receptor binding; GO:0003690 double-stranded DNA binding; GO:0046983 protein dimerization activity; GO:0005515 protein binding; GO:0051427 hormone receptor binding; GO:0003682 chromatin binding; GO:0098772 molecular function regulator; GO:0000987 core promoter proximal region sequence-specific DNA binding; GO:0097159 organic cyclic compound bindi…	K11255	NCOA2, TIF2, KAT13C; nuclear receptor coactivator 2	rno04915 Estrogen signaling pathway - Rattus norvegicus (rat); rno04919 Thyroid hormone signaling pathway - Rattus norvegicus (rat);	IPR014920; IPR009110; IPR013767; IPR000014; IPR011598; IPR010011; IPR014935; IPR032565;	Nuclear receptor coactivator, Ncoa-type, interlocking; Nuclear receptor coactivator, interlocking; PAS fold; PAS domain; Myc-type, basic helix-loop-helix (bHLH) domain; Domain of unknown function DUF1518; Nuclear receptor coactivator, receptor-binding domain; Domain of unknown function DUF4927;
F1MA61	499	0.739	Down	0.0020977	S	Nuclear receptor coactivator OS=Rattus norvegicus OX=10116 GN=Ncoa2 PE=1 SV=3	Ncoa2	1	0.000923555	87.251	MS(1)PGVAGS(1)PR	2	-1.9765	1	0.911793	0.799029	0.885	1.1793	1.13608	1.19656	nucleus	GO:2000273 positive regulation of receptor activity; GO:1904016 response to Thyroglobulin triiodothyronine; GO:0097659 nucleic acid-templated transcription; GO:0023051 regulation of signaling; GO:0009891 positive regulation of biosynthetic process; GO:0044699 single-organism process; GO:0009058 biosynthetic process; GO:0044237 cellular metabolic process; GO:0051253 negative regulation of RNA meta…	GO:0043229 intracellular organelle; GO:0044446 intracellular organelle part; GO:0005737 cytoplasm; GO:0031981 nuclear lumen; GO:0044424 intracellular part; GO:0016604 nuclear body; GO:0005623 cell; GO:0044422 organelle part; GO:0031974 membrane-enclosed lumen; GO:0043226 organelle; GO:0043231 intracellular membrane-bounded organelle; GO:0005634 nucleus; GO:0005654 nucleoplasm; GO:0070013 intracel…	GO:0030546 receptor activator activity; GO:0005102 receptor binding; GO:0003690 double-stranded DNA binding; GO:0046983 protein dimerization activity; GO:0005515 protein binding; GO:0051427 hormone receptor binding; GO:0003682 chromatin binding; GO:0098772 molecular function regulator; GO:0000987 core promoter proximal region sequence-specific DNA binding; GO:0097159 organic cyclic compound bindi…	K11255	NCOA2, TIF2, KAT13C; nuclear receptor coactivator 2	rno04915 Estrogen signaling pathway - Rattus norvegicus (rat); rno04919 Thyroid hormone signaling pathway - Rattus norvegicus (rat);	IPR014920; IPR009110; IPR013767; IPR000014; IPR011598; IPR010011; IPR014935; IPR032565;	Nuclear receptor coactivator, Ncoa-type, interlocking; Nuclear receptor coactivator, interlocking; PAS fold; PAS domain; Myc-type, basic helix-loop-helix (bHLH) domain; Domain of unknown function DUF1518; Nuclear receptor coactivator, receptor-binding domain; Domain of unknown function DUF4927;
Q68A21	307	1.223	Up	0.0111648	S	Transcriptional activator protein Pur-beta OS=Rattus norvegicus OX=10116 GN=Purb PE=1 SV=3	Purb	1	5.27188e-48	225.01	RGGGS(1)GGGDES(1)EGEEVDED	2	-1.2938	13	1.03016	1.15632	1.14667	0.941659	0.865009	0.919081	cytoplasm	GO:0010608 posttranscriptional regulation of gene expression; GO:0097659 nucleic acid-templated transcription; GO:0048869 cellular developmental process; GO:0044699 single-organism process; GO:0009058 biosynthetic process; GO:0044237 cellular metabolic process; GO:0051253 negative regulation of RNA metabolic process; GO:2001141 regulation of RNA biosynthetic process; GO:0008152 metabolic process;…	GO:0043229 intracellular organelle; GO:0043232 intracellular non-membrane-bounded organelle; GO:0043601 nuclear replisome; GO:0044446 intracellular organelle part; GO:0032991 macromolecular complex; GO:0031981 nuclear lumen; GO:0044424 intracellular part; GO:0005623 cell; GO:0044422 organelle part; GO:0043596 nuclear replication fork; GO:0044427 chromosomal part; GO:0043228 non-membrane-bounded o…	GO:0003677 DNA binding; GO:0003723 RNA binding; GO:0003690 double-stranded DNA binding; GO:0090079 translation regulator activity, nucleic acid binding; GO:1990837 sequence-specific double-stranded DNA binding; GO:0003697 single-stranded DNA binding; GO:0000900 translation repressor activity, nucleic acid binding; GO:0005515 protein binding; GO:0043565 sequence-specific DNA binding; GO:0045182 tr…	K21799	PURB; transcriptional activator protein Pur-beta
Q68A21	301	2.394	Up	0.0132405	S	Transcriptional activator protein Pur-beta OS=Rattus norvegicus OX=10116 GN=Purb PE=1 SV=3	Purb	1	7.33956e-38	195.59	RGGGS(1)GGGDES(1)EGEEVDED	2	-1.2938	5	1.31518	1.54713	1.56333	0.52598	0.440497	0.882118	cytoplasm	GO:0010608 posttranscriptional regulation of gene expression; GO:0097659 nucleic acid-templated transcription; GO:0048869 cellular developmental process; GO:0044699 single-organism process; GO:0009058 biosynthetic process; GO:0044237 cellular metabolic process; GO:0051253 negative regulation of RNA metabolic process; GO:2001141 regulation of RNA biosynthetic process; GO:0008152 metabolic process;…	GO:0043229 intracellular organelle; GO:0043232 intracellular non-membrane-bounded organelle; GO:0043601 nuclear replisome; GO:0044446 intracellular organelle part; GO:0032991 macromolecular complex; GO:0031981 nuclear lumen; GO:0044424 intracellular part; GO:0005623 cell; GO:0044422 organelle part; GO:0043596 nuclear replication fork; GO:0044427 chromosomal part; GO:0043228 non-membrane-bounded o…	GO:0003677 DNA binding; GO:0003723 RNA binding; GO:0003690 double-stranded DNA binding; GO:0090079 translation regulator activity, nucleic acid binding; GO:1990837 sequence-specific double-stranded DNA binding; GO:0003697 single-stranded DNA binding; GO:0000900 translation repressor activity, nucleic acid binding; GO:0005515 protein binding; GO:0043565 sequence-specific DNA binding; GO:0045182 tr…	K21799	PURB; transcriptional activator protein Pur-beta
D4AEL8	78	0.714	Down	0.032321	S	5-azacytidine induced gene 1 (Predicted), isoform CRA_a OS=Rattus norvegicus OX=10116 GN=Cep131 PE=1 SV=1	Cep131	0.957373	4.76699e-17	161.41	S(0.003)NS(0.957)T(0.036)T(0.004)QVNQSWTGSPR	2	-0.47406	1	0.731818	0.775531	1	1.21231	1.23668	1.06327	nucleus	GO:0098840 protein transport along microtubule; GO:0044085 cellular component biogenesis; GO:1905508 protein localization to microtubule organizing center; GO:0060271 cilium assembly; GO:0044699 single-organism process; GO:0010564 regulation of cell cycle process; GO:0015031 protein transport; GO:0044782 cilium organization; GO:0051234 establishment of localization; GO:0010970 transport along mic…	GO:0005929 cilium; GO:0043229 intracellular organelle; GO:0044421 extracellular region part; GO:0042995 cell projection; GO:0044450 microtubule organizing center part; GO:0035869 ciliary transition zone; GO:0043232 intracellular non-membrane-bounded organelle; GO:0044430 cytoskeletal part; GO:0034451 centriolar satellite; GO:0005737 cytoplasm; GO:0044446 intracellular organelle part; GO:0044424 i…	GO:0042802 identical protein binding; GO:0042803 protein homodimerization activity; GO:0005488 binding; GO:0044877 macromolecular complex binding; GO:0046983 protein dimerization activity; GO:0005515 protein binding; GO:0032403 protein complex binding;	K16540	AZI1, CEP131; 5-azacytidine-induced protein 1
Q6AYT4	188	0.81	Down	0.0051188	S	Protein FAM122A OS=Rattus norvegicus OX=10116 GN=Fam122a PE=1 SV=1	Fam122a	0.999458	0.000217419	83.573	S(0.001)QS(0.999)PINCIR	2	1.0114	4	0.856589	0.881789	0.943907	1.1508	1.05594	1.10657	nucleus
E9PSN4	25	0.467	Down	0.0054597	S	Zinc finger CCCH type-containing 13 OS=Rattus norvegicus OX=10116 GN=Zc3h13 PE=1 SV=2	Zc3h13	1	0.00278091	77.744	RPS(1)VFER	3	-0.24176	2	0.596457	0.55684	0.775396	1.64801	1.28458	1.19937	nucleus		GO:0043229 intracellular organelle; GO:0044446 intracellular organelle part; GO:0031981 nuclear lumen; GO:0044424 intracellular part; GO:0016604 nuclear body; GO:0005623 cell; GO:0044422 organelle part; GO:0043226 organelle; GO:0043231 intracellular membrane-bounded organelle; GO:0031974 membrane-enclosed lumen; GO:0005654 nucleoplasm; GO:0005634 nucleus; GO:0070013 intracellular organelle lumen;…	GO:0097159 organic cyclic compound binding; GO:1901363 heterocyclic compound binding; GO:0003723 RNA binding; GO:0005488 binding; GO:0003676 nucleic acid binding; GO:0043167 ion binding; GO:0043169 cation binding; GO:0046872 metal ion binding;	K22909			IPR000571;	Zinc finger, CCCH-type;
A0A0G2K5A4	236	0.675	Down	0.0036403	S	Uncharacterized protein OS=Rattus norvegicus OX=10116 PE=4 SV=1	---	0.976665	1.1655e-99	301.41	S(0.977)S(0.02)T(0.004)SVVSEVSPSCETDNR	2	0.53909	1	0.815891	0.757129	0.852217	1.11795	1.32958	1.14682	nucleus	GO:0000003 reproduction; GO:0032504 multicellular organism reproduction; GO:0048232 male gamete generation; GO:0022414 reproductive process; GO:0007283 spermatogenesis; GO:0044702 single organism reproductive process; GO:0044703 multi-organism reproductive process; GO:0019953 sexual reproduction; GO:0044699 single-organism process; GO:0048609 multicellular organismal reproductive process; GO:0032…	GO:0016020 membrane; GO:0043229 intracellular organelle; GO:0098588 bounding membrane of organelle; GO:0019898 extrinsic component of membrane; GO:0031090 organelle membrane; GO:0044446 intracellular organelle part; GO:0005737 cytoplasm; GO:0000139 Golgi membrane; GO:0012505 endomembrane system; GO:0044424 intracellular part; GO:0005623 cell; GO:0044422 organelle part; GO:0090498 extrinsic compon…
A0A0G2K5A4	341	0.827	Down	0.0069648	S	Uncharacterized protein OS=Rattus norvegicus OX=10116 PE=4 SV=1	---	1	1.32306e-97	280.06	DVLQAAAAQHQDQNQEANGEVQS(1)R	3	-0.42978	6	0.915698	0.892822	0.921182	1.16308	1.02866	1.10986	nucleus	GO:0000003 reproduction; GO:0032504 multicellular organism reproduction; GO:0048232 male gamete generation; GO:0022414 reproductive process; GO:0007283 spermatogenesis; GO:0044702 single organism reproductive process; GO:0044703 multi-organism reproductive process; GO:0019953 sexual reproduction; GO:0044699 single-organism process; GO:0048609 multicellular organismal reproductive process; GO:0032…	GO:0016020 membrane; GO:0043229 intracellular organelle; GO:0098588 bounding membrane of organelle; GO:0019898 extrinsic component of membrane; GO:0031090 organelle membrane; GO:0044446 intracellular organelle part; GO:0005737 cytoplasm; GO:0000139 Golgi membrane; GO:0012505 endomembrane system; GO:0044424 intracellular part; GO:0005623 cell; GO:0044422 organelle part; GO:0090498 extrinsic compon…
Q8CF97	993	0.76	Down	0.0026396	S	Deubiquitinating protein VCIP135 OS=Rattus norvegicus OX=10116 GN=Vcpip1 PE=1 SV=2	Vcpip1	0.86796	0.000132857	81.656	S(0.868)RES(0.519)S(0.519)PS(0.094)HGLLK	4	0.56117	3	0.884837	0.810729	0.905975	1.19358	1.10355	1.12461	nucleus	GO:0044085 cellular component biogenesis; GO:0090174 organelle membrane fusion; GO:0016043 cellular component organization; GO:0070646 protein modification by small protein removal; GO:0010256 endomembrane system organization; GO:0048313 Golgi inheritance; GO:0007067 mitotic nuclear division; GO:0048285 organelle fission; GO:0044267 cellular protein metabolic process; GO:0044699 single-organism p…	GO:0043229 intracellular organelle; GO:0005783 endoplasmic reticulum; GO:0044446 intracellular organelle part; GO:0005737 cytoplasm; GO:0005795 Golgi stack; GO:0012505 endomembrane system; GO:0044424 intracellular part; GO:0005623 cell; GO:0044422 organelle part; GO:0043231 intracellular membrane-bounded organelle; GO:0043226 organelle; GO:0005622 intracellular; GO:0044464 cell part; GO:0098791 G…	GO:0004843 thiol-dependent ubiquitin-specific protease activity; GO:0008233 peptidase activity; GO:0036459 thiol-dependent ubiquitinyl hydrolase activity; GO:0003824 catalytic activity; GO:0101005 ubiquitinyl hydrolase activity; GO:0070011 peptidase activity, acting on L-amino acid peptides; GO:0019783 ubiquitin-like protein-specific protease activity; GO:0008234 cysteine-type peptidase activity;…	K11861	VCPIP1, VCIP135; deubiquitinating protein VCIP135 [EC:3.4.19.12]		IPR029071; IPR003323;	Ubiquitin-related domain; OTU domain;
Q4KLL0	96	0.617	Down	0.033385	S	Transcription elongation factor A protein 1 OS=Rattus norvegicus OX=10116 GN=Tcea1 PE=1 SV=1	Tcea1	0.991857	2.97476e-12	140.73	KKEPAIS(0.992)S(0.012)QNS(0.996)PEAR	3	-0.13499	3	0.675073	0.648056	0.958115	1.33772	1.34219	1.01831	nucleus	GO:0097659 nucleic acid-templated transcription; GO:0009058 biosynthetic process; GO:0044237 cellular metabolic process; GO:2001141 regulation of RNA biosynthetic process; GO:0008152 metabolic process; GO:0009893 positive regulation of metabolic process; GO:0051173 positive regulation of nitrogen compound metabolic process; GO:0044093 positive regulation of molecular function; GO:0032784 regulati…	GO:0043226 organelle; GO:0043231 intracellular membrane-bounded organelle; GO:0043229 intracellular organelle; GO:0005634 nucleus; GO:0044464 cell part; GO:0005622 intracellular; GO:0044424 intracellular part; GO:0043227 membrane-bounded organelle; GO:0005623 cell;	GO:0097159 organic cyclic compound binding; GO:1901363 heterocyclic compound binding; GO:0003677 DNA binding; GO:0046914 transition metal ion binding; GO:0005488 binding; GO:0043167 ion binding; GO:0003676 nucleic acid binding; GO:0043169 cation binding; GO:0046872 metal ion binding; GO:0008270 zinc ion binding;	K03145	TFIIS; transcription elongation factor S-II		IPR017923; IPR003617; IPR001222; IPR003618;	Transcription factor IIS, N-terminal; Transcription elongation factor, TFIIS/CRSP70, N-terminal, sub-type; Zinc finger, TFIIS-type; Transcription elongation factor S-II, central domain;
D3ZDS4	16	0.792	Down	0.0048832	S	EMG1 N1-specific pseudouridine methyltransferase OS=Rattus norvegicus OX=10116 GN=Emg1 PE=1 SV=1	Emg1	1	4.68962e-10	123.19	RFS(1)VQEQDWDPAPPK	4	0.17873	3	0.852558	0.855145	0.94334	1.15857	1.06419	1.12626	nucleus	GO:0044085 cellular component biogenesis; GO:0044707 single-multicellular organism process; GO:0016043 cellular component organization; GO:0006997 nucleus organization; GO:0022613 ribonucleoprotein complex biogenesis; GO:0006725 cellular aromatic compound metabolic process; GO:0043009 chordate embryonic development; GO:0000154 rRNA modification; GO:0044699 single-organism process; GO:0009451 RNA …	GO:0043229 intracellular organelle; GO:0043232 intracellular non-membrane-bounded organelle; GO:0044446 intracellular organelle part; GO:0031981 nuclear lumen; GO:0032991 macromolecular complex; GO:0044424 intracellular part; GO:0005730 nucleolus; GO:0005623 cell; GO:0044422 organelle part; GO:0043228 non-membrane-bounded organelle; GO:0030684 preribosome; GO:0031974 membrane-enclosed lumen; GO:0…	GO:0097159 organic cyclic compound binding; GO:1901363 heterocyclic compound binding; GO:0003723 RNA binding; GO:0008757 S-adenosylmethionine-dependent methyltransferase activity; GO:0008168 methyltransferase activity; GO:0008173 RNA methyltransferase activity; GO:0003824 catalytic activity; GO:0005488 binding; GO:0003676 nucleic acid binding; GO:0016741 transferase activity, transferring one-car…	K14568	EMG1, NEP1; rRNA small subunit pseudouridine methyltransferase Nep1 [EC:2.1.1.260]	rno03008 Ribosome biogenesis in eukaryotes - Rattus norvegicus (rat);	IPR029028;	Alpha/beta knot methyltransferases;
B5DEH0	303	0.693	Down	0.0078583	S	LIM domain-containing protein 1 OS=Rattus norvegicus OX=10116 GN=Limd1 PE=1 SV=1	Limd1	0.978027	1.42098e-07	131.45	RDS(0.978)S(0.022)LGYEAPGR	3	1.0619	2	0.809524	0.780512	0.876459	1.25694	1.26638	1.03704	nucleus	GO:0044085 cellular component biogenesis; GO:0044700 single organism signaling; GO:0001649 osteoblast differentiation; GO:0022613 ribonucleoprotein complex biogenesis; GO:0065008 regulation of biological quality; GO:0022618 ribonucleoprotein complex assembly; GO:0010608 posttranscriptional regulation of gene expression; GO:0097659 nucleic acid-templated transcription; GO:0044237 cellular metaboli…	GO:0016020 membrane; GO:0071944 cell periphery; GO:0030054 cell junction; GO:0000932 P-body; GO:0005737 cytoplasm; GO:0032991 macromolecular complex; GO:0044424 intracellular part; GO:0005911 cell-cell junction; GO:0005623 cell; GO:0036464 cytoplasmic ribonucleoprotein granule; GO:0043228 non-membrane-bounded organelle; GO:0005925 focal adhesion; GO:0005622 intracellular; GO:0044464 cell part; GO…	GO:0003714 transcription corepressor activity; GO:0046914 transition metal ion binding; GO:0005488 binding; GO:0043167 ion binding; GO:0000989 transcription factor activity, transcription factor binding; GO:0046872 metal ion binding; GO:0043169 cation binding; GO:0008270 zinc ion binding; GO:0003712 transcription cofactor activity; GO:0000988 transcription factor activity, protein binding;	K16682	AJUBA, LIMD1, WTIP; LIM domain-containing protein	rno04390 Hippo signaling pathway - Rattus norvegicus (rat); rno04392 Hippo signaling pathway - multiple species - Rattus norvegicus (rat);	IPR001781;	Zinc finger, LIM-type;
Q5XI29	194	0.665	Down	0.0118358	T	Cleavage and polyadenylation specificity factor subunit 7 OS=Rattus norvegicus OX=10116 GN=Cpsf7 PE=1 SV=1	Cpsf7	0.991872	4.02986e-17	136.66	DSSDSADGRAT(0.992)PS(0.008)ENLVPSSAR	3	-0.23681	2	0.784069	0.76784	0.871636	1.37356	1.23462	1.0338	nucleus	GO:0044085 cellular component biogenesis; GO:0006396 RNA processing; GO:0016043 cellular component organization; GO:0071822 protein complex subunit organization; GO:0006725 cellular aromatic compound metabolic process; GO:1901360 organic cyclic compound metabolic process; GO:0006807 nitrogen compound metabolic process; GO:0044238 primary metabolic process; GO:0044237 cellular metabolic process; G…	GO:0043229 intracellular organelle; GO:0016020 membrane; GO:0044446 intracellular organelle part; GO:0032991 macromolecular complex; GO:0031981 nuclear lumen; GO:0044424 intracellular part; GO:0005623 cell; GO:0044422 organelle part; GO:0005849 mRNA cleavage factor complex; GO:0043231 intracellular membrane-bounded organelle; GO:0043226 organelle; GO:0031974 membrane-enclosed lumen; GO:0005654 nu…	GO:0097159 organic cyclic compound binding; GO:1901363 heterocyclic compound binding; GO:0003723 RNA binding; GO:1901265 nucleoside phosphate binding; GO:0005488 binding; GO:0003676 nucleic acid binding; GO:0000166 nucleotide binding; GO:0036094 small molecule binding;	K14398	CPSF6_7; cleavage and polyadenylation specificity factor subunit 6/7	rno03015 mRNA surveillance pathway - Rattus norvegicus (rat);	IPR000504; IPR012677;	RNA recognition motif domain; Nucleotide-binding alpha-beta plait domain;
D3ZTF0	448	0.785	Down	0.021463	S	Apical junction component 1 homolog OS=Rattus norvegicus OX=10116 GN=Ajm1 PE=1 SV=3	Ajm1	1	0.000111075	99.069	S(1)WDNILAPGPR	2	1.3275	1	0.793543	0.937557	0.946237	1.16333	1.06152	1.18418	nucleus
D3ZTF0	512	0.755	Down	0.0145789	S	Apical junction component 1 homolog OS=Rattus norvegicus OX=10116 GN=Ajm1 PE=1 SV=3	Ajm1	0.906522	2.61822e-05	94.203	YAALSLS(0.003)ET(0.077)S(0.907)LT(0.014)EK	3	0.51431	2	0.792693	0.899548	0.929619	1.14	1.07091	1.2621	nucleus
D3ZTF0	468	0.712	Down	0.0079237	S	Apical junction component 1 homolog OS=Rattus norvegicus OX=10116 GN=Ajm1 PE=1 SV=3	Ajm1	0.999999	2.87832e-06	144.2	GRS(1)YENLLGR	3	-0.29653	3	0.782498	0.842534	0.915933	1.14667	1.10845	1.31287	nucleus
D3ZTF0	129	0.807	Down	0.0038379	S	Apical junction component 1 homolog OS=Rattus norvegicus OX=10116 GN=Ajm1 PE=1 SV=3	Ajm1	0.998219	0.0131534	47.726	VEGS(0.998)PCREPS(0.001)YPALR	3	0.60004	1	0.899745	0.944796	0.861193	1.07111	1.11887	1.16175	nucleus
D3ZTF0	509	0.637	Down	0.0027787	S	Apical junction component 1 homolog OS=Rattus norvegicus OX=10116 GN=Ajm1 PE=1 SV=3	Ajm1	0.951626	2.61822e-05	94.203	YAALS(0.019)LS(0.952)ET(0.206)S(0.82)LT(0.003)EK	3	0.53406	1	0.751062	0.795475	0.843597	1.32556	1.10636	1.31877	nucleus
Q6S3A0	4034	0.51	Down	0.024302	T	Plectin OS=Rattus norvegicus OX=10116 GN=Plec PE=1 SV=1	Plec	1	0.000117606	113.8	KQIT(1)VEELVR	3	0.13809	1	0.626953	0.508441	0.915942	1.5975	1.16494	1.25784	cytoplasm,nucleus	GO:0044085 cellular component biogenesis; GO:0016043 cellular component organization; GO:0034329 cell junction assembly; GO:0007044 cell-substrate junction assembly; GO:0034330 cell junction organization; GO:0022607 cellular component assembly; GO:0031581 hemidesmosome assembly; GO:0044763 single-organism cellular process; GO:0044699 single-organism process; GO:0009987 cellular process; GO:007184…	GO:0016020 membrane; GO:0044421 extracellular region part; GO:0098862 cluster of actin-based cell projections; GO:0005903 brush border; GO:0071944 cell periphery; GO:0030054 cell junction; GO:0031982 vesicle; GO:0005737 cytoplasm; GO:0099512 supramolecular fiber; GO:0044424 intracellular part; GO:0099080 supramolecular complex; GO:0005623 cell; GO:0043228 non-membrane-bounded organelle; GO:007006…	GO:0097159 organic cyclic compound binding; GO:1901363 heterocyclic compound binding; GO:0050839 cell adhesion molecule binding; GO:0003723 RNA binding; GO:0008092 cytoskeletal protein binding; GO:0005488 binding; GO:0045296 cadherin binding; GO:0003676 nucleic acid binding; GO:0003779 actin binding; GO:0005515 protein binding; GO:0030506 ankyrin binding;	K10388	PLEC; plectin		IPR001715; IPR005326;	Calponin homology domain; Plectin/S10, N-terminal;
A0A0G2JTD1	724	0.766	Down	0.030123	T	Regulation of nuclear pre-mRNA domain-containing 2 OS=Rattus norvegicus OX=10116 GN=Rprd2 PE=1 SV=1	Rprd2	0.999998	1.16936e-24	166.64	GPTSTSVDNIDGT(1)PVRDER	3	0.23085	4	0.941837	0.777565	0.857282	1.24547	1.09747	1.01876	nucleus		GO:0043229 intracellular organelle; GO:0000428 DNA-directed RNA polymerase complex; GO:0055029 nuclear DNA-directed RNA polymerase complex; GO:0061695 transferase complex, transferring phosphorus-containing groups; GO:0044446 intracellular organelle part; GO:0030880 RNA polymerase complex; GO:0032991 macromolecular complex; GO:0031981 nuclear lumen; GO:0044424 intracellular part; GO:1990234 trans…					IPR006903; IPR006569; IPR008942;	RNA polymerase II-binding domain; CID domain; ENTH/VHS;
A0A0H2UHA7	20	0.775	Down	0.0043803	S	Solute carrier family 15 (H+/peptide transporter), member 2, isoform CRA_a OS=Rattus norvegicus OX=10116 GN=Slc15a2 PE=1 SV=1	Slc15a2	0.995179	2.82945e-18	145.6	NES(0.995)KET(0.005)LFSPVSTEEMLPRPPS(1)PPK	4	-1.5129	2	0.822688	0.934942	0.853372	1.10885	1.08861	1.17276	plasma membrane	GO:0006810 transport; GO:0006857 oligopeptide transport; GO:0071702 organic substance transport; GO:0051179 localization; GO:0042886 amide transport; GO:0015833 peptide transport; GO:0071705 nitrogen compound transport; GO:0051234 establishment of localization;	GO:0016020 membrane; GO:0070062 extracellular exosome; GO:0043226 organelle; GO:0044421 extracellular region part; GO:0044425 membrane part; GO:0031982 vesicle; GO:1903561 extracellular vesicle; GO:0031224 intrinsic component of membrane; GO:0043227 membrane-bounded organelle; GO:0016021 integral component of membrane; GO:0005576 extracellular region; GO:0043230 extracellular organelle;	GO:0022892 substrate-specific transporter activity; GO:0015197 peptide transporter activity; GO:0015198 oligopeptide transporter activity; GO:0005215 transporter activity;	K14637	SLC15A2, PEPT2; solute carrier family 15 (oligopeptide transporter), member 2		IPR029028; IPR020846;	Alpha/beta knot methyltransferases; Major facilitator superfamily domain;
P15791	371	1.273	Up	0.0123247	T	Calcium/calmodulin-dependent protein kinase type II subunit delta OS=Rattus norvegicus OX=10116 GN=Camk2d PE=1 SV=1	Camk2d	0.87017	1.09512e-79	278.28	ESTESSNT(0.13)T(0.87)IEDEDVK	2	0.15673	3	1.08544	1.15832	1.13477	0.830769	0.980276	0.842664	cytoplasm	GO:0044700 single organism signaling; GO:0010941 regulation of cell death; GO:0014742 positive regulation of muscle hypertrophy; GO:0030004 cellular monovalent inorganic cation homeostasis; GO:0010564 regulation of cell cycle process; GO:0044237 cellular metabolic process; GO:0008152 metabolic process; GO:0014743 regulation of muscle hypertrophy; GO:0003298 physiological muscle hypertrophy; GO:00…	GO:0016020 membrane; GO:0005783 endoplasmic reticulum; GO:0042175 nuclear outer membrane-endoplasmic reticulum membrane network; GO:0031090 organelle membrane; GO:0071944 cell periphery; GO:0030054 cell junction; GO:0044291 cell-cell contact zone; GO:0005737 cytoplasm; GO:0043025 neuronal cell body; GO:0032991 macromolecular complex; GO:0031224 intrinsic component of membrane; GO:0044424 intracel…	GO:1901265 nucleoside phosphate binding; GO:0016773 phosphotransferase activity, alcohol group as acceptor; GO:0050998 nitric-oxide synthase binding; GO:0005515 protein binding; GO:0004683 calmodulin-dependent protein kinase activity; GO:0004672 protein kinase activity; GO:1901363 heterocyclic compound binding; GO:0097159 organic cyclic compound binding; GO:0016301 kinase activity; GO:0032553 rib…	K04515	CAMK2; calcium/calmodulin-dependent protein kinase (CaM kinase) II [EC:2.7.11.17]	rno04012 ErbB signaling pathway - Rattus norvegicus (rat); rno04020 Calcium signaling pathway - Rattus norvegicus (rat); rno04024 cAMP signaling pathway - Rattus norvegicus (rat); rno04066 HIF-1 signaling pathway - Rattus norvegicus (rat); rno04114 Oocyte meiosis - Rattus norvegicus (rat); rno04217 Necroptosis - Rattus norvegicus (rat); rno04261 Adrenergic signaling in cardiomyocytes - Rattus nor…	IPR000719; IPR013543; IPR011009; IPR032710;	Protein kinase domain; Calcium/calmodulin-dependent protein kinase II, association-domain; Protein kinase-like domain; NTF2-like domain;
P15791	280	0.653	Down	0.020635	S	Calcium/calmodulin-dependent protein kinase type II subunit delta OS=Rattus norvegicus OX=10116 GN=Camk2d PE=1 SV=1	Camk2d	0.999997	6.48105e-05	118.9	STVAS(1)MMHR	3	0.36507	4	0.802743	0.754509	0.791152	1.27115	1.37081	0.954633	cytoplasm	GO:0044700 single organism signaling; GO:0010941 regulation of cell death; GO:0014742 positive regulation of muscle hypertrophy; GO:0030004 cellular monovalent inorganic cation homeostasis; GO:0010564 regulation of cell cycle process; GO:0044237 cellular metabolic process; GO:0008152 metabolic process; GO:0014743 regulation of muscle hypertrophy; GO:0003298 physiological muscle hypertrophy; GO:00…	GO:0016020 membrane; GO:0005783 endoplasmic reticulum; GO:0042175 nuclear outer membrane-endoplasmic reticulum membrane network; GO:0031090 organelle membrane; GO:0071944 cell periphery; GO:0030054 cell junction; GO:0044291 cell-cell contact zone; GO:0005737 cytoplasm; GO:0043025 neuronal cell body; GO:0032991 macromolecular complex; GO:0031224 intrinsic component of membrane; GO:0044424 intracel…	GO:1901265 nucleoside phosphate binding; GO:0016773 phosphotransferase activity, alcohol group as acceptor; GO:0050998 nitric-oxide synthase binding; GO:0005515 protein binding; GO:0004683 calmodulin-dependent protein kinase activity; GO:0004672 protein kinase activity; GO:1901363 heterocyclic compound binding; GO:0097159 organic cyclic compound binding; GO:0016301 kinase activity; GO:0032553 rib…	K04515	CAMK2; calcium/calmodulin-dependent protein kinase (CaM kinase) II [EC:2.7.11.17]	rno04012 ErbB signaling pathway - Rattus norvegicus (rat); rno04020 Calcium signaling pathway - Rattus norvegicus (rat); rno04024 cAMP signaling pathway - Rattus norvegicus (rat); rno04066 HIF-1 signaling pathway - Rattus norvegicus (rat); rno04114 Oocyte meiosis - Rattus norvegicus (rat); rno04217 Necroptosis - Rattus norvegicus (rat); rno04261 Adrenergic signaling in cardiomyocytes - Rattus nor…	IPR000719; IPR013543; IPR011009; IPR032710;	Protein kinase domain; Calcium/calmodulin-dependent protein kinase II, association-domain; Protein kinase-like domain; NTF2-like domain;
P15791	287	0.402	Down	0.031457	T	Calcium/calmodulin-dependent protein kinase type II subunit delta OS=Rattus norvegicus OX=10116 GN=Camk2d PE=1 SV=1	Camk2d	1	0.00208282	92.19	QET(1)VDCLKK	2	0.39916	4	0.632911	0.468938	0.596708	1.91058	1.48718	0.82529	cytoplasm	GO:0044700 single organism signaling; GO:0010941 regulation of cell death; GO:0014742 positive regulation of muscle hypertrophy; GO:0030004 cellular monovalent inorganic cation homeostasis; GO:0010564 regulation of cell cycle process; GO:0044237 cellular metabolic process; GO:0008152 metabolic process; GO:0014743 regulation of muscle hypertrophy; GO:0003298 physiological muscle hypertrophy; GO:00…	GO:0016020 membrane; GO:0005783 endoplasmic reticulum; GO:0042175 nuclear outer membrane-endoplasmic reticulum membrane network; GO:0031090 organelle membrane; GO:0071944 cell periphery; GO:0030054 cell junction; GO:0044291 cell-cell contact zone; GO:0005737 cytoplasm; GO:0043025 neuronal cell body; GO:0032991 macromolecular complex; GO:0031224 intrinsic component of membrane; GO:0044424 intracel…	GO:1901265 nucleoside phosphate binding; GO:0016773 phosphotransferase activity, alcohol group as acceptor; GO:0050998 nitric-oxide synthase binding; GO:0005515 protein binding; GO:0004683 calmodulin-dependent protein kinase activity; GO:0004672 protein kinase activity; GO:1901363 heterocyclic compound binding; GO:0097159 organic cyclic compound binding; GO:0016301 kinase activity; GO:0032553 rib…	K04515	CAMK2; calcium/calmodulin-dependent protein kinase (CaM kinase) II [EC:2.7.11.17]	rno04012 ErbB signaling pathway - Rattus norvegicus (rat); rno04020 Calcium signaling pathway - Rattus norvegicus (rat); rno04024 cAMP signaling pathway - Rattus norvegicus (rat); rno04066 HIF-1 signaling pathway - Rattus norvegicus (rat); rno04114 Oocyte meiosis - Rattus norvegicus (rat); rno04217 Necroptosis - Rattus norvegicus (rat); rno04261 Adrenergic signaling in cardiomyocytes - Rattus nor…	IPR000719; IPR013543; IPR011009; IPR032710;	Protein kinase domain; Calcium/calmodulin-dependent protein kinase II, association-domain; Protein kinase-like domain; NTF2-like domain;
P15791	315	0.487	Down	0.0044615	S	Calcium/calmodulin-dependent protein kinase type II subunit delta OS=Rattus norvegicus OX=10116 GN=Camk2d PE=1 SV=1	Camk2d	1	6.00846e-06	134.76	NFS(1)AAKS(1)LLK	3	0.28489	1	0.662447	0.543086	0.733539	1.56827	1.21795	1.19402	cytoplasm	GO:0044700 single organism signaling; GO:0010941 regulation of cell death; GO:0014742 positive regulation of muscle hypertrophy; GO:0030004 cellular monovalent inorganic cation homeostasis; GO:0010564 regulation of cell cycle process; GO:0044237 cellular metabolic process; GO:0008152 metabolic process; GO:0014743 regulation of muscle hypertrophy; GO:0003298 physiological muscle hypertrophy; GO:00…	GO:0016020 membrane; GO:0005783 endoplasmic reticulum; GO:0042175 nuclear outer membrane-endoplasmic reticulum membrane network; GO:0031090 organelle membrane; GO:0071944 cell periphery; GO:0030054 cell junction; GO:0044291 cell-cell contact zone; GO:0005737 cytoplasm; GO:0043025 neuronal cell body; GO:0032991 macromolecular complex; GO:0031224 intrinsic component of membrane; GO:0044424 intracel…	GO:1901265 nucleoside phosphate binding; GO:0016773 phosphotransferase activity, alcohol group as acceptor; GO:0050998 nitric-oxide synthase binding; GO:0005515 protein binding; GO:0004683 calmodulin-dependent protein kinase activity; GO:0004672 protein kinase activity; GO:1901363 heterocyclic compound binding; GO:0097159 organic cyclic compound binding; GO:0016301 kinase activity; GO:0032553 rib…	K04515	CAMK2; calcium/calmodulin-dependent protein kinase (CaM kinase) II [EC:2.7.11.17]	rno04012 ErbB signaling pathway - Rattus norvegicus (rat); rno04020 Calcium signaling pathway - Rattus norvegicus (rat); rno04024 cAMP signaling pathway - Rattus norvegicus (rat); rno04066 HIF-1 signaling pathway - Rattus norvegicus (rat); rno04114 Oocyte meiosis - Rattus norvegicus (rat); rno04217 Necroptosis - Rattus norvegicus (rat); rno04261 Adrenergic signaling in cardiomyocytes - Rattus nor…	IPR000719; IPR013543; IPR011009; IPR032710;	Protein kinase domain; Calcium/calmodulin-dependent protein kinase II, association-domain; Protein kinase-like domain; NTF2-like domain;
P15791	319	0.487	Down	0.0044615	S	Calcium/calmodulin-dependent protein kinase type II subunit delta OS=Rattus norvegicus OX=10116 GN=Camk2d PE=1 SV=1	Camk2d	1	6.00846e-06	134.76	NFS(1)AAKS(1)LLK	3	0.28489	1	0.662447	0.543086	0.733539	1.56827	1.21795	1.19402	cytoplasm	GO:0044700 single organism signaling; GO:0010941 regulation of cell death; GO:0014742 positive regulation of muscle hypertrophy; GO:0030004 cellular monovalent inorganic cation homeostasis; GO:0010564 regulation of cell cycle process; GO:0044237 cellular metabolic process; GO:0008152 metabolic process; GO:0014743 regulation of muscle hypertrophy; GO:0003298 physiological muscle hypertrophy; GO:00…	GO:0016020 membrane; GO:0005783 endoplasmic reticulum; GO:0042175 nuclear outer membrane-endoplasmic reticulum membrane network; GO:0031090 organelle membrane; GO:0071944 cell periphery; GO:0030054 cell junction; GO:0044291 cell-cell contact zone; GO:0005737 cytoplasm; GO:0043025 neuronal cell body; GO:0032991 macromolecular complex; GO:0031224 intrinsic component of membrane; GO:0044424 intracel…	GO:1901265 nucleoside phosphate binding; GO:0016773 phosphotransferase activity, alcohol group as acceptor; GO:0050998 nitric-oxide synthase binding; GO:0005515 protein binding; GO:0004683 calmodulin-dependent protein kinase activity; GO:0004672 protein kinase activity; GO:1901363 heterocyclic compound binding; GO:0097159 organic cyclic compound binding; GO:0016301 kinase activity; GO:0032553 rib…	K04515	CAMK2; calcium/calmodulin-dependent protein kinase (CaM kinase) II [EC:2.7.11.17]	rno04012 ErbB signaling pathway - Rattus norvegicus (rat); rno04020 Calcium signaling pathway - Rattus norvegicus (rat); rno04024 cAMP signaling pathway - Rattus norvegicus (rat); rno04066 HIF-1 signaling pathway - Rattus norvegicus (rat); rno04114 Oocyte meiosis - Rattus norvegicus (rat); rno04217 Necroptosis - Rattus norvegicus (rat); rno04261 Adrenergic signaling in cardiomyocytes - Rattus nor…	IPR000719; IPR013543; IPR011009; IPR032710;	Protein kinase domain; Calcium/calmodulin-dependent protein kinase II, association-domain; Protein kinase-like domain; NTF2-like domain;
A0A0G2KAH4	1374	0.8	Down	0.029077	S	Dedicator of cytokinesis 6 OS=Rattus norvegicus OX=10116 GN=Dock6 PE=1 SV=1	Dock6	0.96574	0.0019381	91.549	INS(0.966)LT(0.034)FK	2	0.38992	2	0.891348	0.937183	0.835953	1.14124	1.20043	0.990205	nucleus	GO:0050794 regulation of cellular process; GO:0044700 single organism signaling; GO:0051716 cellular response to stimulus; GO:0043547 positive regulation of GTPase activity; GO:0035556 intracellular signal transduction; GO:0044699 single-organism process; GO:0007264 small GTPase mediated signal transduction; GO:0023052 signaling; GO:0050896 response to stimulus; GO:0043085 positive regulation of …	GO:0044464 cell part; GO:0005622 intracellular; GO:0005737 cytoplasm; GO:0044424 intracellular part; GO:0005829 cytosol; GO:0005623 cell; GO:0044444 cytoplasmic part;	GO:0098772 molecular function regulator; GO:0005085 guanyl-nucleotide exchange factor activity;	K21852	DOCK6_7_8; dedicator of cytokinesis protein 6/7/8		IPR021816; IPR010703; IPR027357; IPR027007;	Dedicator of cytokinesis C/D, N-terminal; Dedicator of cytokinesis, C-terminal; DHR-2 domain; DHR-1 domain;
F1MA89	83	0.814	Down	0.046776	S	Cyclin Y OS=Rattus norvegicus OX=10116 GN=Ccny PE=1 SV=2	Ccny	1	6.33519e-07	98.817	S(1)LFINHHPPGQTSR	3	-0.29135	1	0.951934	0.787936	0.949432	1.10145	1.17256	1.02862	nucleus	GO:0045859 regulation of protein kinase activity; GO:0050794 regulation of cellular process; GO:1904031 positive regulation of cyclin-dependent protein kinase activity; GO:0032270 positive regulation of cellular protein metabolic process; GO:0060255 regulation of macromolecule metabolic process; GO:0023051 regulation of signaling; GO:0031399 regulation of protein modification process; GO:0044699 …	GO:0016020 membrane; GO:0043229 intracellular organelle; GO:0044421 extracellular region part; GO:0061695 transferase complex, transferring phosphorus-containing groups; GO:0071944 cell periphery; GO:0005737 cytoplasm; GO:0031982 vesicle; GO:0032991 macromolecular complex; GO:0000307 cyclin-dependent protein kinase holoenzyme complex; GO:0044424 intracellular part; GO:1990234 transferase complex;…	GO:0016538 cyclin-dependent protein serine/threonine kinase regulator activity; GO:0030234 enzyme regulator activity; GO:0005488 binding; GO:0019901 protein kinase binding; GO:0005515 protein binding; GO:0019887 protein kinase regulator activity; GO:0019207 kinase regulator activity; GO:0098772 molecular function regulator; GO:0019900 kinase binding; GO:0019899 enzyme binding;				IPR013763; IPR006671;	Cyclin-like; Cyclin, N-terminal;
F1MA89	66	0.401	Down	0.0188826	S	Cyclin Y OS=Rattus norvegicus OX=10116 GN=Ccny PE=1 SV=2	Ccny	0.981835	0.000362136	123.62	AS(0.982)T(0.018)IFLS(0.001)K	2	0.36912	3	0.607268	0.427898	0.684211	1.81056	1.51983	0.959935	nucleus	GO:0045859 regulation of protein kinase activity; GO:0050794 regulation of cellular process; GO:1904031 positive regulation of cyclin-dependent protein kinase activity; GO:0032270 positive regulation of cellular protein metabolic process; GO:0060255 regulation of macromolecule metabolic process; GO:0023051 regulation of signaling; GO:0031399 regulation of protein modification process; GO:0044699 …	GO:0016020 membrane; GO:0043229 intracellular organelle; GO:0044421 extracellular region part; GO:0061695 transferase complex, transferring phosphorus-containing groups; GO:0071944 cell periphery; GO:0005737 cytoplasm; GO:0031982 vesicle; GO:0032991 macromolecular complex; GO:0000307 cyclin-dependent protein kinase holoenzyme complex; GO:0044424 intracellular part; GO:1990234 transferase complex;…	GO:0016538 cyclin-dependent protein serine/threonine kinase regulator activity; GO:0030234 enzyme regulator activity; GO:0005488 binding; GO:0019901 protein kinase binding; GO:0005515 protein binding; GO:0019887 protein kinase regulator activity; GO:0019207 kinase regulator activity; GO:0098772 molecular function regulator; GO:0019900 kinase binding; GO:0019899 enzyme binding;				IPR013763; IPR006671;	Cyclin-like; Cyclin, N-terminal;
G3V984	2033	0.806	Down	0.045524	S	Protein bassoon OS=Rattus norvegicus OX=10116 GN=Bsn PE=4 SV=1	Bsn	0.996388	1.00765e-09	119.37	YLGQGLQYGS(0.996)FT(0.004)DLR	2	-2.2411	4	0.90593	0.862201	0.920398	1.15983	1.21311	0.96238	nucleus	GO:0050794 regulation of cellular process; GO:0044700 single organism signaling; GO:0044085 cellular component biogenesis; GO:0016043 cellular component organization; GO:0044707 single-multicellular organism process; GO:0035418 protein localization to synapse; GO:0044699 single-organism process; GO:0050896 response to stimulus; GO:0007165 signal transduction; GO:0007154 cell communication; GO:002…	GO:0030425 dendrite; GO:0005938 cell cortex; GO:0071944 cell periphery; GO:0005737 cytoplasm; GO:0099568 cytoplasmic region; GO:0044424 intracellular part; GO:0005623 cell; GO:0032279 asymmetric synapse; GO:0099738 cell cortex region; GO:0098793 presynapse; GO:0044464 cell part; GO:0005622 intracellular; GO:0014069 postsynaptic density; GO:0043005 neuron projection; GO:0044306 neuron projection t…	GO:0046872 metal ion binding; GO:0043169 cation binding; GO:0005488 binding; GO:0043167 ion binding;				IPR008899; IPR013083; IPR011011;	Zinc finger, piccolo-type; Zinc finger, RING/FYVE/PHD-type; Zinc finger, FYVE/PHD-type;
A0A0G2KB73	1525	0.691	Down	0.032756	S	Replication timing regulatory factor 1 OS=Rattus norvegicus OX=10116 GN=Rif1 PE=1 SV=1	Rif1	0.998998	8.92863e-91	289.69	RAS(0.999)QGLIS(0.001)GVENSESDSSEAK	3	-0.6472	1	0.884181	0.667341	0.863286	1.01278	1.30263	1.17804	nucleus	GO:0065008 regulation of biological quality; GO:0032270 positive regulation of cellular protein metabolic process; GO:0044699 single-organism process; GO:0044237 cellular metabolic process; GO:0051253 negative regulation of RNA metabolic process; GO:0006282 regulation of DNA repair; GO:1905269 positive regulation of chromatin organization; GO:0051130 positive regulation of cellular component orga…	GO:0016020 membrane; GO:0000781 chromosome, telomeric region; GO:0051233 spindle midzone; GO:0031090 organelle membrane; GO:0071944 cell periphery; GO:0001940 male pronucleus; GO:0044424 intracellular part; GO:0016604 nuclear body; GO:0005623 cell; GO:0044422 organelle part; GO:0044427 chromosomal part; GO:0043228 non-membrane-bounded organelle; GO:0000793 condensed chromosome; GO:0031974 membran…	GO:0005488 binding;	K11138	RIF1; telomere-associated protein RIF1	rno04550 Signaling pathways regulating pluripotency of stem cells - Rattus norvegicus (rat);	IPR022031; IPR016024;	Telomere-associated protein Rif1, N-terminal; Armadillo-type fold;
A0A0G2KB73	1404	0.585	Down	0.041022	S	Replication timing regulatory factor 1 OS=Rattus norvegicus OX=10116 GN=Rif1 PE=1 SV=1	Rif1	0.999929	1.22655e-34	220.74	RRS(1)EAVESSGDSQEK	3	0.11515	3	0.656309	0.533873	0.998897	1.17994	1.37551	1.18542	nucleus	GO:0065008 regulation of biological quality; GO:0032270 positive regulation of cellular protein metabolic process; GO:0044699 single-organism process; GO:0044237 cellular metabolic process; GO:0051253 negative regulation of RNA metabolic process; GO:0006282 regulation of DNA repair; GO:1905269 positive regulation of chromatin organization; GO:0051130 positive regulation of cellular component orga…	GO:0016020 membrane; GO:0000781 chromosome, telomeric region; GO:0051233 spindle midzone; GO:0031090 organelle membrane; GO:0071944 cell periphery; GO:0001940 male pronucleus; GO:0044424 intracellular part; GO:0016604 nuclear body; GO:0005623 cell; GO:0044422 organelle part; GO:0044427 chromosomal part; GO:0043228 non-membrane-bounded organelle; GO:0000793 condensed chromosome; GO:0031974 membran…	GO:0005488 binding;	K11138	RIF1; telomere-associated protein RIF1	rno04550 Signaling pathways regulating pluripotency of stem cells - Rattus norvegicus (rat);	IPR022031; IPR016024;	Telomere-associated protein Rif1, N-terminal; Armadillo-type fold;
D3ZQJ3	137	0.663	Down	0.0130156	S	GRB10-interacting GYF protein 1 OS=Rattus norvegicus OX=10116 GN=Gigyf1 PE=1 SV=1	Gigyf1	1	1.45286e-05	115.12	S(1)IEEGDGAFGR	2	2.5555	1	0.864654	0.695085	0.824494	1.26788	1.03772	1.28916	nucleus	GO:0050794 regulation of cellular process; GO:0044700 single organism signaling; GO:0051716 cellular response to stimulus; GO:0007165 signal transduction; GO:0050789 regulation of biological process; GO:0007154 cell communication; GO:0048009 insulin-like growth factor receptor signaling pathway; GO:0007166 cell surface receptor signaling pathway; GO:0044699 single-organism process; GO:0007169 tra…		GO:0005515 protein binding; GO:0005488 binding;	K18730	GIGYF; PERQ amino acid-rich with GYF domain-containing protein		IPR003169;	GYF domain;
D3ZQJ3	157	0.772	Down	0.027924	S	GRB10-interacting GYF protein 1 OS=Rattus norvegicus OX=10116 GN=Gigyf1 PE=1 SV=1	Gigyf1	0.999833	0.000240523	91.812	SQS(1)WDDRGER	2	-0.4563	2	0.882181	0.784353	0.938284	1.09265	1.24771	1.03414	nucleus	GO:0050794 regulation of cellular process; GO:0044700 single organism signaling; GO:0051716 cellular response to stimulus; GO:0007165 signal transduction; GO:0050789 regulation of biological process; GO:0007154 cell communication; GO:0048009 insulin-like growth factor receptor signaling pathway; GO:0007166 cell surface receptor signaling pathway; GO:0044699 single-organism process; GO:0007169 tra…		GO:0005515 protein binding; GO:0005488 binding;	K18730	GIGYF; PERQ amino acid-rich with GYF domain-containing protein		IPR003169;	GYF domain;
Q2KMM2	132	1.294	Up	0.028083	S	Trafficking protein particle complex subunit 1 OS=Rattus norvegicus OX=10116 GN=Trappc1 PE=2 SV=1	Trappc1	0.987795	0.0158969	51.286	S(0.012)RLDS(0.988)YVR	3	-0.084186	1	1.00506	1.20432	1.19884	0.79686	0.910698	0.925964	cytoplasm,nucleus	GO:0046907 intracellular transport; GO:0043547 positive regulation of GTPase activity; GO:0016192 vesicle-mediated transport; GO:0048193 Golgi vesicle transport; GO:0051641 cellular localization; GO:0043085 positive regulation of catalytic activity; GO:0051234 establishment of localization; GO:0006810 transport; GO:0051649 establishment of localization in cell; GO:0051336 regulation of hydrolase …	GO:0043229 intracellular organelle; GO:0005783 endoplasmic reticulum; GO:0005737 cytoplasm; GO:0032991 macromolecular complex; GO:0012505 endomembrane system; GO:0044424 intracellular part; GO:0005623 cell; GO:0043231 intracellular membrane-bounded organelle; GO:0043226 organelle; GO:0005622 intracellular; GO:0044464 cell part; GO:0030008 TRAPP complex; GO:0005794 Golgi apparatus; GO:0043227 memb…	GO:0005088 Ras guanyl-nucleotide exchange factor activity; GO:0098772 molecular function regulator; GO:0017112 Rab guanyl-nucleotide exchange factor activity; GO:0005085 guanyl-nucleotide exchange factor activity;	K20300	TRAPPC1, BET5; trafficking protein particle complex subunit 1		IPR011012;	Longin-like domain;
A0A0G2JXI4	671	0.565	Down	0.0023966	Y	Signal transducer and activator of transcription OS=Rattus norvegicus OX=10116 GN=Stat5b PE=1 SV=1	Stat5b	1	0.000229423	80.245	AADGY(1)VKPQIK	3	-0.2042	1	0.724026	0.647992	0.747959	1.40018	1.25517	1.09632	nucleus	GO:0050794 regulation of cellular process; GO:0044700 single organism signaling; GO:0006725 cellular aromatic compound metabolic process; GO:0097659 nucleic acid-templated transcription; GO:0060255 regulation of macromolecule metabolic process; GO:0019219 regulation of nucleobase-containing compound metabolic process; GO:0044699 single-organism process; GO:0009058 biosynthetic process; GO:0050896…	GO:0043226 organelle; GO:0043231 intracellular membrane-bounded organelle; GO:0043229 intracellular organelle; GO:0005634 nucleus; GO:0044464 cell part; GO:0005622 intracellular; GO:0005737 cytoplasm; GO:0044424 intracellular part; GO:0043227 membrane-bounded organelle; GO:0005623 cell;	GO:0097159 organic cyclic compound binding; GO:1901363 heterocyclic compound binding; GO:0003677 DNA binding; GO:0005488 binding; GO:0001071 nucleic acid binding transcription factor activity; GO:0003676 nucleic acid binding; GO:0004871 signal transducer activity; GO:0003700 transcription factor activity, sequence-specific DNA binding;	K11224	STAT5B; signal transducer and activator of transcription 5B	rno04012 ErbB signaling pathway - Rattus norvegicus (rat); rno04062 Chemokine signaling pathway - Rattus norvegicus (rat); rno04217 Necroptosis - Rattus norvegicus (rat); rno04630 JAK-STAT signaling pathway - Rattus norvegicus (rat); rno04658 Th1 and Th2 cell differentiation - Rattus norvegicus (rat); rno04659 Th17 cell differentiation - Rattus norvegicus (rat); rno04917 Prolactin signaling pathw…	IPR013801; IPR008967; IPR013800; IPR011992; IPR000980; IPR012345; IPR013799; IPR015988;	STAT transcription factor, DNA-binding; p53-like transcription factor, DNA-binding; STAT transcription factor, all-alpha domain; EF-hand domain pair; SH2 domain; STAT transcription factor, DNA-binding, subdomain; STAT transcription factor, protein interaction; STAT transcription factor, coiled coil;
A0A0G2K242	658	1.226	Up	0.0114438	S	Zinc finger protein 516 OS=Rattus norvegicus OX=10116 GN=Zfp516 PE=4 SV=1	Zfp516	1	2.54405e-09	144.97	GPEQHRHS(1)LDLK	4	-0.072448	3	1.06175	1.06816	1.17659	0.862603	0.956175	0.878641	nucleus	GO:0044700 single organism signaling; GO:0097659 nucleic acid-templated transcription; GO:0048869 cellular developmental process; GO:0009891 positive regulation of biosynthetic process; GO:0044699 single-organism process; GO:0009058 biosynthetic process; GO:0044237 cellular metabolic process; GO:2001141 regulation of RNA biosynthetic process; GO:0008152 metabolic process; GO:0007165 signal transd…	GO:0043226 organelle; GO:0043231 intracellular membrane-bounded organelle; GO:0043229 intracellular organelle; GO:0005634 nucleus; GO:0044464 cell part; GO:0005622 intracellular; GO:0044424 intracellular part; GO:0043227 membrane-bounded organelle; GO:0005623 cell;	GO:0003677 DNA binding; GO:0000976 transcription regulatory region sequence-specific DNA binding; GO:0003690 double-stranded DNA binding; GO:1990837 sequence-specific double-stranded DNA binding; GO:0043167 ion binding; GO:0005515 protein binding; GO:0043565 sequence-specific DNA binding; GO:0000987 core promoter proximal region sequence-specific DNA binding; GO:0003700 transcription factor activ…	K22411	rno04714 Thermogenesis - Rattus norvegicus (rat);		IPR015880; IPR007087; IPR013087;	Zinc finger, C2H2-like; Zinc finger, C2H2; Zinc finger C2H2-type/integrase DNA-binding domain;
Q9QVC8	78	1.474	Up	0.0070784	S	Peptidyl-prolyl cis-trans isomerase FKBP4 OS=Rattus norvegicus OX=10116 GN=Fkbp4 PE=1 SV=3	Fkbp4	1	0.00543502	58.595	DKFS(1)FDLGK	3	1.3055	1	1.05065	1.26353	1.27827	0.746875	0.839604	0.851256	cytoplasm	GO:0044700 single organism signaling; GO:0044085 cellular component biogenesis; GO:0048732 gland development; GO:0022414 reproductive process; GO:0031111 negative regulation of microtubule polymerization or depolymerization; GO:0007566 embryo implantation; GO:0044237 cellular metabolic process; GO:0000041 transition metal ion transport; GO:0008152 metabolic process; GO:0065003 macromolecular comp…	GO:0044421 extracellular region part; GO:0005874 microtubule; GO:0031982 vesicle; GO:0005737 cytoplasm; GO:0043025 neuronal cell body; GO:0032991 macromolecular complex; GO:0030426 growth cone; GO:0099512 supramolecular fiber; GO:0044424 intracellular part; GO:0005623 cell; GO:0099080 supramolecular complex; GO:0044422 organelle part; GO:0043228 non-membrane-bounded organelle; GO:0031974 membrane…	GO:1901265 nucleoside phosphate binding; GO:0035259 glucocorticoid receptor binding; GO:0005102 receptor binding; GO:0005515 protein binding; GO:0051427 hormone receptor binding; GO:1901363 heterocyclic compound binding; GO:0097159 organic cyclic compound binding; GO:0008092 cytoskeletal protein binding; GO:0003824 catalytic activity; GO:0032553 ribonucleotide binding; GO:0005488 binding; GO:0032…	K09571	FKBP4_5; FK506-binding protein 4/5 [EC:5.2.1.8]	rno04915 Estrogen signaling pathway - Rattus norvegicus (rat);	IPR011990; IPR013026; IPR001179;	Tetratricopeptide-like helical domain; Tetratricopeptide repeat-containing domain; FKBP-type peptidyl-prolyl cis-trans isomerase domain;
A0A0G2KA27	812	0.805	Down	0.04862	S	MAP kinase-activating death domain protein OS=Rattus norvegicus OX=10116 GN=Madd PE=1 SV=1	Madd	1	0.000805172	90.05	LLRPNS(1)LK	3	-0.53817	4	0.826259	0.823353	1.026	1.04134	1.1502	1.13347	plasma membrane	GO:0010941 regulation of cell death; GO:0032270 positive regulation of cellular protein metabolic process; GO:0023051 regulation of signaling; GO:1902533 positive regulation of intracellular signal transduction; GO:0044699 single-organism process; GO:2001233 regulation of apoptotic signaling pathway; GO:0071900 regulation of protein serine/threonine kinase activity; GO:0010646 regulation of cell …	GO:0016020 membrane; GO:0071944 cell periphery; GO:0044425 membrane part; GO:0044464 cell part; GO:0005622 intracellular; GO:0005737 cytoplasm; GO:0031224 intrinsic component of membrane; GO:0044424 intracellular part; GO:0005829 cytosol; GO:0005623 cell; GO:0016021 integral component of membrane; GO:0005886 plasma membrane; GO:0044444 cytoplasmic part;	GO:0005088 Ras guanyl-nucleotide exchange factor activity; GO:0098772 molecular function regulator; GO:0017112 Rab guanyl-nucleotide exchange factor activity; GO:0005085 guanyl-nucleotide exchange factor activity;				IPR005113; IPR005112; IPR001194;	uDENN domain; dDENN domain; DENN domain;
Q5XIB5	49	1.431	Up	0.0129171	S	Coiled-coil domain-containing protein 86 OS=Rattus norvegicus OX=10116 GN=Ccdc86 PE=1 SV=1	Ccdc86	0.99997	5.85277e-14	122.95	ELES(1)PRVPPLDLVSPQPQPET(0.003)S(0.023)PES(0.974)PCPK	4	1.2605	1	1.13387	1.35336	1.07708	0.754941	0.869301	0.865938	nucleus		GO:0043229 intracellular organelle; GO:0043232 intracellular non-membrane-bounded organelle; GO:0044446 intracellular organelle part; GO:0031981 nuclear lumen; GO:0044424 intracellular part; GO:0005730 nucleolus; GO:0005623 cell; GO:0044422 organelle part; GO:0043228 non-membrane-bounded organelle; GO:0043231 intracellular membrane-bounded organelle; GO:0043226 organelle; GO:0031974 membrane-encl…	GO:0097159 organic cyclic compound binding; GO:1901363 heterocyclic compound binding; GO:0003723 RNA binding; GO:0005488 binding; GO:0003676 nucleic acid binding;	K14822	CGR1; rRNA-processing protein CGR1
F1LXV3	300	1.81	Up	0.0157023	S	Serine/threonine kinase 26 OS=Rattus norvegicus OX=10116 GN=Stk26 PE=1 SV=2	Stk26	1	1.5745e-105	298.15	AEGHS(1)DEESDSEGSDSESSSR	3	0.91971	1	1.22506	1.54258	1.13898	0.580018	0.869665	0.708566	nucleus	GO:0044085 cellular component biogenesis; GO:0050794 regulation of cellular process; GO:0044700 single organism signaling; GO:0016043 cellular component organization; GO:0016310 phosphorylation; GO:0010941 regulation of cell death; GO:0043067 regulation of programmed cell death; GO:1901700 response to oxygen-containing compound; GO:0044267 cellular protein metabolic process; GO:0044699 single-org…	GO:0016020 membrane; GO:0044421 extracellular region part; GO:0016324 apical plasma membrane; GO:0031410 cytoplasmic vesicle; GO:0031090 organelle membrane; GO:0071944 cell periphery; GO:0031982 vesicle; GO:0005737 cytoplasm; GO:0044424 intracellular part; GO:0005623 cell; GO:0044422 organelle part; GO:0070062 extracellular exosome; GO:0098590 plasma membrane region; GO:0044464 cell part; GO:0044…	GO:1901265 nucleoside phosphate binding; GO:0016773 phosphotransferase activity, alcohol group as acceptor; GO:0046983 protein dimerization activity; GO:0005515 protein binding; GO:0004672 protein kinase activity; GO:0004702 signal transducer, downstream of receptor, with serine/threonine kinase activity; GO:0004871 signal transducer activity; GO:0097159 organic cyclic compound binding; GO:190136…	K08838	STK24_25_MST4; serine/threonine-protein kinase 24/25/MST4 [EC:2.7.11.1]		IPR000719; IPR011009;	Protein kinase domain; Protein kinase-like domain;
Q9ES53	299	0.751	Down	0.02056	S	Ubiquitin recognition factor in ER-associated degradation protein 1 OS=Rattus norvegicus OX=10116 GN=Ufd1 PE=1 SV=1	Ufd1	1	6.25342e-17	169.37	FVAFSGEGQS(1)LRK	3	-1.0628	2	0.888247	0.814961	0.868932	0.995972	1.15615	1.27291	mitochondria	GO:0009968 negative regulation of signal transduction; GO:0039531 regulation of viral-induced cytoplasmic pattern recognition receptor signaling pathway; GO:0023051 regulation of signaling; GO:0002698 negative regulation of immune effector process; GO:0051241 negative regulation of multicellular organismal process; GO:0044699 single-organism process; GO:0036503 ERAD pathway; GO:0001818 negative r…	GO:0016020 membrane; GO:0043229 intracellular organelle; GO:0042175 nuclear outer membrane-endoplasmic reticulum membrane network; GO:0005783 endoplasmic reticulum; GO:0098796 membrane protein complex; GO:0044446 intracellular organelle part; GO:0005737 cytoplasm; GO:0034098 VCP-NPL4-UFD1 AAA ATPase complex; GO:0032991 macromolecular complex; GO:0012505 endomembrane system; GO:0044424 intracellul…	GO:0036435 K48-linked polyubiquitin binding; GO:0031593 polyubiquitin binding; GO:0005102 receptor binding; GO:0051117 ATPase binding; GO:0005488 binding; GO:0044877 macromolecular complex binding; GO:0043130 ubiquitin binding; GO:0005515 protein binding; GO:0032182 ubiquitin-like protein binding; GO:0019899 enzyme binding; GO:0032403 protein complex binding;	K14016	UFD1; ubiquitin fusion degradation protein 1	rno04141 Protein processing in endoplasmic reticulum - Rattus norvegicus (rat);
A0A0G2QC39	33	1.326	Up	0.049804	S	Taxilin gamma OS=Rattus norvegicus OX=10116 GN=Txlng PE=1 SV=1	Txlng	1	0.000905237	94.309	RRS(1)PPEK	3	-0.12273	6	1.27302	1.08507	1.09425	0.76121	0.817641	1.02452	cytoplasm	GO:0050794 regulation of cellular process; GO:0050789 regulation of biological process; GO:0030278 regulation of ossification; GO:0030500 regulation of bone mineralization; GO:0010564 regulation of cell cycle process; GO:0051726 regulation of cell cycle; GO:0070167 regulation of biomineral tissue development; GO:0050793 regulation of developmental process; GO:0051239 regulation of multicellular o…	GO:0016020 membrane; GO:0043229 intracellular organelle; GO:0031090 organelle membrane; GO:0005635 nuclear envelope; GO:0005737 cytoplasm; GO:0044446 intracellular organelle part; GO:0031967 organelle envelope; GO:0012505 endomembrane system; GO:0044424 intracellular part; GO:0005829 cytosol; GO:0005623 cell; GO:0044422 organelle part; GO:0043226 organelle; GO:0043231 intracellular membrane-bound…	GO:0000149 SNARE binding; GO:0005515 protein binding; GO:0046982 protein heterodimerization activity; GO:0019905 syntaxin binding; GO:0005488 binding; GO:0046983 protein dimerization activity;
A0A0G2QC39	473	1.22	Up	0.038143	S	Taxilin gamma OS=Rattus norvegicus OX=10116 GN=Txlng PE=1 SV=1	Txlng	0.987231	7.51991e-12	118.54	AADGDLVS(0.987)PT(0.013)TQPCAVLDSFK	3	-0.61424	2	1.20423	1.04915	1.07163	0.823775	0.932607	0.970149	cytoplasm	GO:0050794 regulation of cellular process; GO:0050789 regulation of biological process; GO:0030278 regulation of ossification; GO:0030500 regulation of bone mineralization; GO:0010564 regulation of cell cycle process; GO:0051726 regulation of cell cycle; GO:0070167 regulation of biomineral tissue development; GO:0050793 regulation of developmental process; GO:0051239 regulation of multicellular o…	GO:0016020 membrane; GO:0043229 intracellular organelle; GO:0031090 organelle membrane; GO:0005635 nuclear envelope; GO:0005737 cytoplasm; GO:0044446 intracellular organelle part; GO:0031967 organelle envelope; GO:0012505 endomembrane system; GO:0044424 intracellular part; GO:0005829 cytosol; GO:0005623 cell; GO:0044422 organelle part; GO:0043226 organelle; GO:0043231 intracellular membrane-bound…	GO:0000149 SNARE binding; GO:0005515 protein binding; GO:0046982 protein heterodimerization activity; GO:0019905 syntaxin binding; GO:0005488 binding; GO:0046983 protein dimerization activity;
G3V7T6	142	0.586	Down	0.0053953	T	Splicing factor 3b, subunit 1 OS=Rattus norvegicus OX=10116 GN=Sf3b1 PE=1 SV=1	Sf3b1	1	1.56594e-17	156.83	T(0.013)MIIS(0.987)PERLDPFADGGKT(1)PDPK	5	-0.035777	6	0.710891	0.67458	0.838741	1.45455	1.17343	1.17036	plasma membrane	GO:0044085 cellular component biogenesis; GO:0016043 cellular component organization; GO:0022613 ribonucleoprotein complex biogenesis; GO:0022618 ribonucleoprotein complex assembly; GO:0006725 cellular aromatic compound metabolic process; GO:0044237 cellular metabolic process; GO:0071704 organic substance metabolic process; GO:0000398 mRNA splicing, via spliceosome; GO:0008152 metabolic process; …	GO:0005686 U2 snRNP; GO:0005684 U2-type spliceosomal complex; GO:0032991 macromolecular complex; GO:0044424 intracellular part; GO:0016604 nuclear body; GO:0005623 cell; GO:0044422 organelle part; GO:0031974 membrane-enclosed lumen; GO:1902494 catalytic complex; GO:0005654 nucleoplasm; GO:0070013 intracellular organelle lumen; GO:0016607 nuclear speck; GO:0005622 intracellular; GO:0044464 cell pa…	GO:0097159 organic cyclic compound binding; GO:1901363 heterocyclic compound binding; GO:0003729 mRNA binding; GO:0003723 RNA binding; GO:0005488 binding; GO:0003676 nucleic acid binding;	K12828	SF3B1, SAP155; splicing factor 3B subunit 1	rno03040 Spliceosome - Rattus norvegicus (rat);	IPR011989; IPR015016; IPR016024;	Armadillo-like helical; Splicing factor 3B subunit 1; Armadillo-type fold;
G3V7T6	332	0.754	Down	0.029465	S	Splicing factor 3b, subunit 1 OS=Rattus norvegicus OX=10116 GN=Sf3b1 PE=1 SV=1	Sf3b1	0.999961	0.0113068	48.872	GGDS(0.017)IGET(0.985)PT(0.998)PGAS(1)K	3	0.8231	1	0.950495	0.835806	0.80531	1.29929	1.09939	1.03629	plasma membrane	GO:0044085 cellular component biogenesis; GO:0016043 cellular component organization; GO:0022613 ribonucleoprotein complex biogenesis; GO:0022618 ribonucleoprotein complex assembly; GO:0006725 cellular aromatic compound metabolic process; GO:0044237 cellular metabolic process; GO:0071704 organic substance metabolic process; GO:0000398 mRNA splicing, via spliceosome; GO:0008152 metabolic process; …	GO:0005686 U2 snRNP; GO:0005684 U2-type spliceosomal complex; GO:0032991 macromolecular complex; GO:0044424 intracellular part; GO:0016604 nuclear body; GO:0005623 cell; GO:0044422 organelle part; GO:0031974 membrane-enclosed lumen; GO:1902494 catalytic complex; GO:0005654 nucleoplasm; GO:0070013 intracellular organelle lumen; GO:0016607 nuclear speck; GO:0005622 intracellular; GO:0044464 cell pa…	GO:0097159 organic cyclic compound binding; GO:1901363 heterocyclic compound binding; GO:0003729 mRNA binding; GO:0003723 RNA binding; GO:0005488 binding; GO:0003676 nucleic acid binding;	K12828	SF3B1, SAP155; splicing factor 3B subunit 1	rno03040 Spliceosome - Rattus norvegicus (rat);	IPR011989; IPR015016; IPR016024;	Armadillo-like helical; Splicing factor 3B subunit 1; Armadillo-type fold;
G3V7T6	248	0.654	Down	0.044938	T	Splicing factor 3b, subunit 1 OS=Rattus norvegicus OX=10116 GN=Sf3b1 PE=1 SV=1	Sf3b1	0.998846	3.29794e-07	135.57	GS(0.577)ET(0.423)PGAT(0.999)PGS(0.001)K	3	1.6267	2	0.894059	0.665678	0.828909	1.49642	1.14503	1.0121	plasma membrane	GO:0044085 cellular component biogenesis; GO:0016043 cellular component organization; GO:0022613 ribonucleoprotein complex biogenesis; GO:0022618 ribonucleoprotein complex assembly; GO:0006725 cellular aromatic compound metabolic process; GO:0044237 cellular metabolic process; GO:0071704 organic substance metabolic process; GO:0000398 mRNA splicing, via spliceosome; GO:0008152 metabolic process; …	GO:0005686 U2 snRNP; GO:0005684 U2-type spliceosomal complex; GO:0032991 macromolecular complex; GO:0044424 intracellular part; GO:0016604 nuclear body; GO:0005623 cell; GO:0044422 organelle part; GO:0031974 membrane-enclosed lumen; GO:1902494 catalytic complex; GO:0005654 nucleoplasm; GO:0070013 intracellular organelle lumen; GO:0016607 nuclear speck; GO:0005622 intracellular; GO:0044464 cell pa…	GO:0097159 organic cyclic compound binding; GO:1901363 heterocyclic compound binding; GO:0003729 mRNA binding; GO:0003723 RNA binding; GO:0005488 binding; GO:0003676 nucleic acid binding;	K12828	SF3B1, SAP155; splicing factor 3B subunit 1	rno03040 Spliceosome - Rattus norvegicus (rat);	IPR011989; IPR015016; IPR016024;	Armadillo-like helical; Splicing factor 3B subunit 1; Armadillo-type fold;
Q5XI21	174	0.765	Down	0.0175234	T	Target of myb1 homolog (Chicken) OS=Rattus norvegicus OX=10116 GN=Tom1 PE=1 SV=1	Tom1	0.897188	0.00344205	72.88	T(0.001)VFNS(0.096)ET(0.897)PS(0.006)R	2	0.2551	1	0.913676	0.785141	0.915464	1.24537	1.09952	1.07234	cytoplasm,nucleus	GO:0045184 establishment of protein localization; GO:0006810 transport; GO:0046907 intracellular transport; GO:0070727 cellular macromolecule localization; GO:0051649 establishment of localization in cell; GO:0006886 intracellular protein transport; GO:0071702 organic substance transport; GO:0008104 protein localization; GO:0033036 macromolecule localization; GO:0034613 cellular protein localizat…	GO:0097708 intracellular vesicle; GO:0043229 intracellular organelle; GO:0016020 membrane; GO:0044421 extracellular region part; GO:0031410 cytoplasmic vesicle; GO:0005737 cytoplasm; GO:0031982 vesicle; GO:0012505 endomembrane system; GO:0044424 intracellular part; GO:0005829 cytosol; GO:0005623 cell; GO:0005576 extracellular region; GO:0005769 early endosome; GO:0043226 organelle; GO:0070062 ext…	GO:0030276 clathrin binding; GO:0005515 protein binding; GO:0005488 binding;				IPR002014; IPR004152; IPR008942;	VHS domain; GAT domain; ENTH/VHS;
A0A0G2K9N3	449	1.237	Up	0.044821	S	DEAD (Asp-Glu-Ala-Asp) box polypeptide 3 OS=Rattus norvegicus OX=10116 GN=Ddx3 PE=1 SV=1	Ddx3	1	3.56452e-05	92.932	KGADS(1)LENFLFQER	3	1.1335	1	1.14157	1.23148	0.981262	0.858	0.944223	0.910402	nucleus	GO:0006518 peptide metabolic process; GO:0006725 cellular aromatic compound metabolic process; GO:0060255 regulation of macromolecule metabolic process; GO:0044267 cellular protein metabolic process; GO:0009058 biosynthetic process; GO:1901566 organonitrogen compound biosynthetic process; GO:0044237 cellular metabolic process; GO:0071704 organic substance metabolic process; GO:0008152 metabolic p…	GO:0043229 intracellular organelle; GO:0016020 membrane; GO:0043232 intracellular non-membrane-bounded organelle; GO:0005737 cytoplasm; GO:0032991 macromolecular complex; GO:0044424 intracellular part; GO:0005829 cytosol; GO:0005623 cell; GO:0036464 cytoplasmic ribonucleoprotein granule; GO:0043228 non-membrane-bounded organelle; GO:0043231 intracellular membrane-bounded organelle; GO:0043226 org…	GO:1901265 nucleoside phosphate binding; GO:0008026 ATP-dependent helicase activity; GO:0016817 hydrolase activity, acting on acid anhydrides; GO:0016787 hydrolase activity; GO:0016887 ATPase activity; GO:0097159 organic cyclic compound binding; GO:1901363 heterocyclic compound binding; GO:0016462 pyrophosphatase activity; GO:0003824 catalytic activity; GO:0032553 ribonucleotide binding; GO:00054…	K17642	DDX3Y; ATP-dependent RNA helicase DDX3Y [EC:3.6.4.13]		IPR011545; IPR014014; IPR014001; IPR027417; IPR001650;	DEAD/DEAH box helicase domain; RNA helicase, DEAD-box type, Q motif; Helicase superfamily 1/2, ATP-binding domain; P-loop containing nucleoside triphosphate hydrolase; Helicase, C-terminal;
B2RYP6	383	1.877	Up	0.049304	S	LUC7-like 2 (S. cerevisiae) OS=Rattus norvegicus OX=10116 GN=Luc7l2 PE=1 SV=1	Luc7l2	0.826131	0.00156483	66.004	SEDRRS(0.826)S(0.174)EER	3	0.90352	1	1.19184	1.06518	1.64643	0.489468	0.639713	0.950664	nucleus	GO:0044085 cellular component biogenesis; GO:0006376 mRNA splice site selection; GO:0016043 cellular component organization; GO:0022613 ribonucleoprotein complex biogenesis; GO:0022618 ribonucleoprotein complex assembly; GO:0006725 cellular aromatic compound metabolic process; GO:0044237 cellular metabolic process; GO:0071704 organic substance metabolic process; GO:0000398 mRNA splicing, via spli…	GO:0005685 U1 snRNP; GO:0043229 intracellular organelle; GO:0044446 intracellular organelle part; GO:0005684 U2-type spliceosomal complex; GO:0032991 macromolecular complex; GO:0044424 intracellular part; GO:0005681 spliceosomal complex; GO:0005623 cell; GO:0044422 organelle part; GO:0097525 spliceosomal snRNP complex; GO:0043231 intracellular membrane-bounded organelle; GO:0043226 organelle; GO:…	GO:0097159 organic cyclic compound binding; GO:1901363 heterocyclic compound binding; GO:0003729 mRNA binding; GO:0003723 RNA binding; GO:0005488 binding; GO:0003676 nucleic acid binding;	K13212	LUC7L2; RNA-binding protein Luc7-like 2
A0A0U1RRZ5	1095	0.7	Down	0.0161203	S	Protein PRRC2A OS=Rattus norvegicus OX=10116 GN=Prrc2a PE=1 SV=1	Prrc2a	0.999995	7.60128e-40	221.21	T(0.004)AS(0.459)ET(0.539)RS(0.998)EGS(1)EYEEIPK	2	0.030009	6	0.789017	0.753922	0.919339	1.3051	1.17266	1.03956	nucleus		GO:0016020 membrane; GO:0070062 extracellular exosome; GO:0043226 organelle; GO:0044421 extracellular region part; GO:0031982 vesicle; GO:1903561 extracellular vesicle; GO:0043227 membrane-bounded organelle; GO:0005576 extracellular region; GO:0043230 extracellular organelle;	GO:0097159 organic cyclic compound binding; GO:1901363 heterocyclic compound binding; GO:0003723 RNA binding; GO:0005488 binding; GO:0003676 nucleic acid binding;				IPR009738;	BAT2, N-terminal;
A0A0U1RRZ5	455	0.789	Down	0.0116435	S	Protein PRRC2A OS=Rattus norvegicus OX=10116 GN=Prrc2a PE=1 SV=1	Prrc2a	0.958358	1.62288e-06	107.41	KQS(0.958)S(0.039)S(0.003)EISLAVER	3	0.22687	2	0.836224	0.827451	0.966958	1.09388	1.15622	1.08309	nucleus		GO:0016020 membrane; GO:0070062 extracellular exosome; GO:0043226 organelle; GO:0044421 extracellular region part; GO:0031982 vesicle; GO:1903561 extracellular vesicle; GO:0043227 membrane-bounded organelle; GO:0005576 extracellular region; GO:0043230 extracellular organelle;	GO:0097159 organic cyclic compound binding; GO:1901363 heterocyclic compound binding; GO:0003723 RNA binding; GO:0005488 binding; GO:0003676 nucleic acid binding;				IPR009738;	BAT2, N-terminal;
A0A0U1RRZ5	783	0.601	Down	0.0093238	T	Protein PRRC2A OS=Rattus norvegicus OX=10116 GN=Prrc2a PE=1 SV=1	Prrc2a	1	0.00177526	79.885	ERGT(1)PPVDPK	3	0.32954	2	0.710019	0.740196	0.794947	1.50204	1.16341	1.07319	nucleus		GO:0016020 membrane; GO:0070062 extracellular exosome; GO:0043226 organelle; GO:0044421 extracellular region part; GO:0031982 vesicle; GO:1903561 extracellular vesicle; GO:0043227 membrane-bounded organelle; GO:0005576 extracellular region; GO:0043230 extracellular organelle;	GO:0097159 organic cyclic compound binding; GO:1901363 heterocyclic compound binding; GO:0003723 RNA binding; GO:0005488 binding; GO:0003676 nucleic acid binding;				IPR009738;	BAT2, N-terminal;
A0A0U1RRZ5	1017	0.777	Down	0.046702	S	Protein PRRC2A OS=Rattus norvegicus OX=10116 GN=Prrc2a PE=1 SV=1	Prrc2a	0.999996	0.000980686	94.692	RDYS(1)YER	3	-0.53754	5	0.847784	0.747059	1.01749	1.13469	1.14388	1.0821	nucleus		GO:0016020 membrane; GO:0070062 extracellular exosome; GO:0043226 organelle; GO:0044421 extracellular region part; GO:0031982 vesicle; GO:1903561 extracellular vesicle; GO:0043227 membrane-bounded organelle; GO:0005576 extracellular region; GO:0043230 extracellular organelle;	GO:0097159 organic cyclic compound binding; GO:1901363 heterocyclic compound binding; GO:0003723 RNA binding; GO:0005488 binding; GO:0003676 nucleic acid binding;				IPR009738;	BAT2, N-terminal;
A0A0U1RRZ5	1761	0.764	Down	0.028864	S	Protein PRRC2A OS=Rattus norvegicus OX=10116 GN=Prrc2a PE=1 SV=1	Prrc2a	0.999979	6.48249e-06	102.39	AGS(1)QVEFGTTNK	3	-0.37667	1	0.88632	0.85	0.853256	1.2398	1.18602	0.963403	nucleus		GO:0016020 membrane; GO:0070062 extracellular exosome; GO:0043226 organelle; GO:0044421 extracellular region part; GO:0031982 vesicle; GO:1903561 extracellular vesicle; GO:0043227 membrane-bounded organelle; GO:0005576 extracellular region; GO:0043230 extracellular organelle;	GO:0097159 organic cyclic compound binding; GO:1901363 heterocyclic compound binding; GO:0003723 RNA binding; GO:0005488 binding; GO:0003676 nucleic acid binding;				IPR009738;	BAT2, N-terminal;
A0A0U1RRZ5	1307	1.354	Up	0.026659	S	Protein PRRC2A OS=Rattus norvegicus OX=10116 GN=Prrc2a PE=1 SV=1	Prrc2a	0.946	8.9203e-168	346.73	T(0.049)AAKS(0.946)PDLS(0.005)NQNSDQANEEWETASESSDFASER	4	-1.0868	1	0.988439	1.28824	1.14674	0.778571	0.898253	0.851632	nucleus		GO:0016020 membrane; GO:0070062 extracellular exosome; GO:0043226 organelle; GO:0044421 extracellular region part; GO:0031982 vesicle; GO:1903561 extracellular vesicle; GO:0043227 membrane-bounded organelle; GO:0005576 extracellular region; GO:0043230 extracellular organelle;	GO:0097159 organic cyclic compound binding; GO:1901363 heterocyclic compound binding; GO:0003723 RNA binding; GO:0005488 binding; GO:0003676 nucleic acid binding;				IPR009738;	BAT2, N-terminal;
P49793	839	1.251	Up	0.00195523	S	Nuclear pore complex protein Nup98-Nup96 OS=Rattus norvegicus OX=10116 GN=Nup98 PE=1 SV=2	Nup98	1	0.0102085	57.149	CLIKS(1)PDR	3	0.64284	1	1.13422	1.09028	1.14128	0.946573	0.86781	0.875246	nucleus	GO:0044085 cellular component biogenesis; GO:0050658 RNA transport; GO:0072594 establishment of protein localization to organelle; GO:0017038 protein import; GO:0044699 single-organism process; GO:0051169 nuclear transport; GO:0051168 nuclear export; GO:0009058 biosynthetic process; GO:0000973 posttranscriptional tethering of RNA polymerase II gene DNA at nuclear periphery; GO:0044237 cellular me…	GO:0016020 membrane; GO:0031090 organelle membrane; GO:0032991 macromolecular complex; GO:0044424 intracellular part; GO:0005623 cell; GO:0044422 organelle part; GO:0043228 non-membrane-bounded organelle; GO:0044427 chromosomal part; GO:0031974 membrane-enclosed lumen; GO:0005654 nucleoplasm; GO:0031965 nuclear membrane; GO:0070013 intracellular organelle lumen; GO:0044464 cell part; GO:0005622 i…	GO:0005048 signal sequence binding; GO:0097159 organic cyclic compound binding; GO:1901363 heterocyclic compound binding; GO:0003723 RNA binding; GO:0005487 nucleocytoplasmic transporter activity; GO:0042277 peptide binding; GO:0005488 binding; GO:0008139 nuclear localization sequence binding; GO:0003676 nucleic acid binding; GO:0005515 protein binding; GO:0033218 amide binding; GO:0017056 struct…	K14297	NUP98, ADAR2, NUP116; nuclear pore complex protein Nup98-Nup96	rno03013 RNA transport - Rattus norvegicus (rat); rno05164 Influenza A - Rattus norvegicus (rat);	IPR007230; IPR021967;	Peptidase S59, nucleoporin; Nuclear protein 96;
D3ZYJ5	135	0.447	Down	0.027736	S	GRAM domain-containing 1B OS=Rattus norvegicus OX=10116 GN=Gramd1b PE=1 SV=1	Gramd1b	0.92136	3.14311e-08	110.01	KECSESSSQQSSQQS(0.077)S(0.921)HDDDS(0.001)S(0.001)R	4	0.12059	1	0.79822	0.414986	0.634397	1.02061	1.42137	1.69151	cytoplasm		GO:0031224 intrinsic component of membrane; GO:0016020 membrane; GO:0016021 integral component of membrane; GO:0044425 membrane part;					IPR031968; IPR004182;	Domain of unknown function DUF4782; GRAM domain;
D3ZYJ5	200	0.764	Down	0.020318	T	GRAM domain-containing 1B OS=Rattus norvegicus OX=10116 GN=Gramd1b PE=1 SV=1	Gramd1b	0.92341	0.000184656	103.67	S(0.004)PS(0.073)T(0.923)PEQGVQR	2	-0.11197	1	0.915925	0.770413	0.917611	1.18057	1.18952	1.03934	cytoplasm		GO:0031224 intrinsic component of membrane; GO:0016020 membrane; GO:0016021 integral component of membrane; GO:0044425 membrane part;					IPR031968; IPR004182;	Domain of unknown function DUF4782; GRAM domain;
F1LXQ7	960	0.689	Down	0.0034796	S	Rho GTPase-activating protein 21 OS=Rattus norvegicus OX=10116 GN=Arhgap21 PE=1 SV=3	Arhgap21	1	0.00161364	70.942	VGGS(1)IRPWK	3	1.2628	1	0.899702	0.816206	0.753739	1.22176	1.24162	1.11951	nucleus	GO:0050794 regulation of cellular process; GO:0044700 single organism signaling; GO:0072384 organelle transport along microtubule; GO:0051640 organelle localization; GO:0016043 cellular component organization; GO:0046907 intracellular transport; GO:0065008 regulation of biological quality; GO:0010256 endomembrane system organization; GO:0044699 single-organism process; GO:0050896 response to stim…	GO:0016020 membrane; GO:0043229 intracellular organelle; GO:0043232 intracellular non-membrane-bounded organelle; GO:0071944 cell periphery; GO:0030054 cell junction; GO:0005737 cytoplasm; GO:0012505 endomembrane system; GO:0044424 intracellular part; GO:0005623 cell; GO:0015629 actin cytoskeleton; GO:0005886 plasma membrane; GO:0043228 non-membrane-bounded organelle; GO:0043231 intracellular mem…	GO:0030234 enzyme regulator activity; GO:0060589 nucleoside-triphosphatase regulator activity; GO:0005488 binding; GO:0030695 GTPase regulator activity; GO:0005515 protein binding; GO:0098772 molecular function regulator; GO:0008047 enzyme activator activity; GO:0005096 GTPase activator activity;	K20315	ARHGAP21_23; Rho GTPase-activating protein 21/23		IPR011993; IPR001478; IPR008936; IPR001849; IPR000198;	PH domain-like; PDZ domain; Rho GTPase activation protein; Pleckstrin homology domain; Rho GTPase-activating protein domain;
P23640	206	1.211	Up	0.040679	S	Ras-related protein Rab-27A OS=Rattus norvegicus OX=10116 GN=Rab27a PE=1 SV=1	Rab27a	0.98877	6.87139e-95	306.62	SNGHT(0.011)S(0.989)TDQLSEEKEK	4	0.51481	11	1.15194	1.13288	1.00099	0.900192	0.832836	0.97927	cytoplasm	GO:0044085 cellular component biogenesis; GO:0044700 single organism signaling; GO:0060627 regulation of vesicle-mediated transport; GO:0007596 blood coagulation; GO:0065008 regulation of biological quality; GO:0045321 leukocyte activation; GO:0009891 positive regulation of biosynthetic process; GO:0015031 protein transport; GO:0042110 T cell activation; GO:0051875 pigment granule localization; G…	GO:0016020 membrane; GO:0030425 dendrite; GO:0044421 extracellular region part; GO:0031090 organelle membrane; GO:0005737 cytoplasm; GO:0044433 cytoplasmic vesicle part; GO:0005623 cell; GO:0044422 organelle part; GO:0070062 extracellular exosome; GO:0070382 exocytic vesicle; GO:0098590 plasma membrane region; GO:0030136 clathrin-coated vesicle; GO:0031902 late endosome membrane; GO:0005622 intra…	GO:1901265 nucleoside phosphate binding; GO:0016817 hydrolase activity, acting on acid anhydrides; GO:0016787 hydrolase activity; GO:0005515 protein binding; GO:0031489 myosin V binding; GO:0097159 organic cyclic compound binding; GO:1901363 heterocyclic compound binding; GO:0016462 pyrophosphatase activity; GO:0008092 cytoskeletal protein binding; GO:0019003 GDP binding; GO:0003824 catalytic act…	K07885	RAB27A; Ras-related protein Rab-27A		IPR005225; IPR027417;	Small GTP-binding protein domain; P-loop containing nucleoside triphosphate hydrolase;
F1LRS8	86	0.638	Down	0.031457	S	CD2-associated protein OS=Rattus norvegicus OX=10116 GN=Cd2ap PE=1 SV=2	Cd2ap	0.915167	1.33464e-32	189.99	IS(0.915)T(0.066)Y(0.019)GLPAGGIQPHPQTK	4	-0.23802	2	0.642137	0.694471	0.98289	1.27485	1.28075	1.07739	nucleus	GO:0060627 regulation of vesicle-mediated transport; GO:0051674 localization of cell; GO:0007067 mitotic nuclear division; GO:0051241 negative regulation of multicellular organismal process; GO:0044699 single-organism process; GO:0032911 negative regulation of transforming growth factor beta1 production; GO:0001818 negative regulation of cytokine production; GO:0044237 cellular metabolic process;…	GO:0016020 membrane; GO:0044421 extracellular region part; GO:0031410 cytoplasmic vesicle; GO:0071944 cell periphery; GO:0030054 cell junction; GO:0031982 vesicle; GO:0005737 cytoplasm; GO:0032991 macromolecular complex; GO:0099512 supramolecular fiber; GO:0044424 intracellular part; GO:0099080 supramolecular complex; GO:0005623 cell; GO:0005911 cell-cell junction; GO:0044422 organelle part; GO:0…	GO:0050839 cell adhesion molecule binding; GO:0005102 receptor binding; GO:0005488 binding; GO:0044877 macromolecular complex binding; GO:0045296 cadherin binding; GO:0005126 cytokine receptor binding; GO:0070851 growth factor receptor binding; GO:0008022 protein C-terminus binding; GO:0005515 protein binding; GO:0005172 vascular endothelial growth factor receptor binding; GO:0019904 protein doma…	K13738	CD2AP; CD2-associated protein	rno05100 Bacterial invasion of epithelial cells - Rattus norvegicus (rat);	IPR001452;	SH3 domain;
G3V7W3	79	0.713	Down	0.00113871	S	Atrophin-1 OS=Rattus norvegicus OX=10116 GN=LOC100911672 PE=1 SV=1	LOC100911672	0.986195	2.08789e-14	150.69	S(0.003)EEIS(0.997)ES(0.986)ES(0.014)EETSAPK	3	-0.30311	2	0.859918	0.764196	0.863544	1.17782	1.14556	1.16784	nucleus				K05626	DRPLA; atrophin-1 (dentatorubral-pallidoluysian atrophy protein)
A0A0G2K0I3	459	1.216	Up	0.0108634	S	Nicotinamide phosphoribosyltransferase OS=Rattus norvegicus OX=10116 GN=Nampt PE=1 SV=1	Nampt	0.982362	0.00569135	66.663	S(0.018)YS(0.982)FDEVR	2	-0.98317	1	1.12815	1.1629	1.01902	0.881373	0.932748	0.908624	nucleus	GO:0051188 cofactor biosynthetic process; GO:0009165 nucleotide biosynthetic process; GO:0019362 pyridine nucleotide metabolic process; GO:0006725 cellular aromatic compound metabolic process; GO:0046496 nicotinamide nucleotide metabolic process; GO:0009117 nucleotide metabolic process; GO:0044699 single-organism process; GO:0009058 biosynthetic process; GO:0019363 pyridine nucleotide biosyntheti…		GO:0016763 transferase activity, transferring pentosyl groups; GO:0016757 transferase activity, transferring glycosyl groups; GO:0004514 nicotinate-nucleotide diphosphorylase (carboxylating) activity; GO:0003824 catalytic activity; GO:0016740 transferase activity;	K03462	NAMPT; nicotinamide phosphoribosyltransferase [EC:2.4.2.12]	rno00760 Nicotinate and nicotinamide metabolism - Rattus norvegicus (rat); rno01100 Metabolic pathways - Rattus norvegicus (rat); rno04621 NOD-like receptor signaling pathway - Rattus norvegicus (rat);	IPR002638;	Quinolinate phosphoribosyl transferase, C-terminal;
A0A0G2JZZ3	18	1.21	Up	0.0073047	S	Cap-binding complex-dependent translation initiation factor OS=Rattus norvegicus OX=10116 GN=Ctif PE=1 SV=1	Ctif	1	4.08274e-05	132.09	S(1)QEIEELER	2	0.31623	1	1.04061	1.16163	1.09796	0.881645	0.944714	0.901047	nucleus	GO:0050794 regulation of cellular process; GO:0006725 cellular aromatic compound metabolic process; GO:0060255 regulation of macromolecule metabolic process; GO:0010608 posttranscriptional regulation of gene expression; GO:0048519 negative regulation of biological process; GO:0044237 cellular metabolic process; GO:0071704 organic substance metabolic process; GO:0044270 cellular nitrogen compound …	GO:0044464 cell part; GO:0005622 intracellular; GO:0005737 cytoplasm; GO:0048471 perinuclear region of cytoplasm; GO:0044424 intracellular part; GO:0005829 cytosol; GO:0005623 cell; GO:0044444 cytoplasmic part;	GO:0097159 organic cyclic compound binding; GO:1901363 heterocyclic compound binding; GO:0003723 RNA binding; GO:0005515 protein binding; GO:0005488 binding; GO:0003676 nucleic acid binding;				IPR016024; IPR003890; IPR016021;	Armadillo-type fold; MIF4G-like, type 3; MIF4G-like domain;
D3ZJ32	660	0.772	Down	0.0023005	S	Extended synaptotagmin 2 OS=Rattus norvegicus OX=10116 GN=Esyt2 PE=1 SV=3	Esyt2	0.929786	1.33617e-27	201.8	DLGRS(0.93)S(0.119)S(0.703)S(0.248)LLASPSHIAAK	4	0.0098532	4	0.856581	0.875	0.872105	1.06079	1.20203	1.10846	cytoplasm		GO:0016020 membrane; GO:0005783 endoplasmic reticulum; GO:0042175 nuclear outer membrane-endoplasmic reticulum membrane network; GO:0019898 extrinsic component of membrane; GO:0071944 cell periphery; GO:0005737 cytoplasm; GO:0031224 intrinsic component of membrane; GO:0044424 intracellular part; GO:0005887 integral component of plasma membrane; GO:0031234 extrinsic component of cytoplasmic side o…	GO:0005544 calcium-dependent phospholipid binding; GO:0070405 ammonium ion binding; GO:0043167 ion binding; GO:0005515 protein binding; GO:0031210 phosphatidylcholine binding; GO:0050839 cell adhesion molecule binding; GO:0050997 quaternary ammonium group binding; GO:0042802 identical protein binding; GO:0005488 binding; GO:0005543 phospholipid binding; GO:0045296 cadherin binding; GO:0035091 pho…				IPR031468; IPR000008;	Synaptotagmin-like mitochondrial-lipid-binding domain; C2 domain;
D3ZJ32	662	0.805	Down	0.0051161	S	Extended synaptotagmin 2 OS=Rattus norvegicus OX=10116 GN=Esyt2 PE=1 SV=3	Esyt2	0.849442	1.33617e-27	201.8	S(0.838)S(0.237)S(0.849)S(0.075)LLASPSHIAAK	3	2.3384	4	0.883104	0.869186	0.914401	1.04255	1.17868	1.09154	cytoplasm		GO:0016020 membrane; GO:0005783 endoplasmic reticulum; GO:0042175 nuclear outer membrane-endoplasmic reticulum membrane network; GO:0019898 extrinsic component of membrane; GO:0071944 cell periphery; GO:0005737 cytoplasm; GO:0031224 intrinsic component of membrane; GO:0044424 intracellular part; GO:0005887 integral component of plasma membrane; GO:0031234 extrinsic component of cytoplasmic side o…	GO:0005544 calcium-dependent phospholipid binding; GO:0070405 ammonium ion binding; GO:0043167 ion binding; GO:0005515 protein binding; GO:0031210 phosphatidylcholine binding; GO:0050839 cell adhesion molecule binding; GO:0050997 quaternary ammonium group binding; GO:0042802 identical protein binding; GO:0005488 binding; GO:0005543 phospholipid binding; GO:0045296 cadherin binding; GO:0035091 pho…				IPR031468; IPR000008;	Synaptotagmin-like mitochondrial-lipid-binding domain; C2 domain;
A0A0G2JU01	244	0.67	Down	0.0082968	S	Rho guanine nucleotide exchange factor 1 OS=Rattus norvegicus OX=10116 GN=Arhgef1 PE=1 SV=1	Arhgef1	0.999495	0.00101352	75.589	KGS(0.999)LGISSR	3	0.35135	2	0.811229	0.687319	0.90619	1.21694	1.22938	1.14183	cytoplasm,nucleus	GO:0050794 regulation of cellular process; GO:1902531 regulation of intracellular signal transduction; GO:0043547 positive regulation of GTPase activity; GO:0023051 regulation of signaling; GO:0046578 regulation of Ras protein signal transduction; GO:0043085 positive regulation of catalytic activity; GO:0010646 regulation of cell communication; GO:0050789 regulation of biological process; GO:0051…	GO:0044424 intracellular part; GO:0005623 cell; GO:0044464 cell part; GO:0005622 intracellular; GO:0005737 cytoplasm;	GO:0005088 Ras guanyl-nucleotide exchange factor activity; GO:0098772 molecular function regulator; GO:0005085 guanyl-nucleotide exchange factor activity; GO:0005089 Rho guanyl-nucleotide exchange factor activity;	K12330	ARHGEF1; Rho guanine nucleotide exchange factor 1	rno04270 Vascular smooth muscle contraction - Rattus norvegicus (rat); rno04611 Platelet activation - Rattus norvegicus (rat); rno04810 Regulation of actin cytoskeleton - Rattus norvegicus (rat); rno04928 Parathyroid hormone synthesis, secretion and action - Rattus norvegicus (rat); rno05163 Human cytomegalovirus infection - Rattus norvegicus (rat); rno05200 Pathways in cancer - Rattus norvegicus…	IPR016137; IPR011993; IPR015212; IPR000219; IPR001849;	RGS domain; PH domain-like; Regulator of G protein signalling-like domain; Dbl homology (DH) domain; Pleckstrin homology domain;
Q5XHZ8	536	0.774	Down	0.037036	S	Component of oligomeric golgi complex 3 OS=Rattus norvegicus OX=10116 GN=Cog3 PE=1 SV=1	Cog3	0.979699	1.83383e-19	141.52	KS(0.596)GS(0.314)T(0.11)DS(0.98)LNPRPQTTISPADLHGMWYPTVR	4	-1.5258	3	0.842574	0.789729	1.00097	1.13113	1.22597	1.04589	cytoplasm	GO:0046907 intracellular transport; GO:0016043 cellular component organization; GO:0043413 macromolecule glycosylation; GO:0065008 regulation of biological quality; GO:0010256 endomembrane system organization; GO:0044267 cellular protein metabolic process; GO:0048193 Golgi vesicle transport; GO:0044699 single-organism process; GO:0009058 biosynthetic process; GO:0044237 cellular metabolic process…	GO:0043229 intracellular organelle; GO:0016020 membrane; GO:0005737 cytoplasm; GO:0044446 intracellular organelle part; GO:0005801 cis-Golgi network; GO:0032991 macromolecular complex; GO:0012505 endomembrane system; GO:0044424 intracellular part; GO:0005623 cell; GO:0044422 organelle part; GO:0043231 intracellular membrane-bounded organelle; GO:0043226 organelle; GO:0005622 intracellular; GO:004…	GO:0022892 substrate-specific transporter activity; GO:0008565 protein transporter activity; GO:0005215 transporter activity;	K20290	COG3, SEC34; conserved oligomeric Golgi complex subunit 3
A0A0G2JUT1	365	0.66	Down	0.030518	T	Cell adhesion molecule 1 OS=Rattus norvegicus OX=10116 GN=Cadm1 PE=1 SV=1	Cadm1	1	1.15218e-68	226.42	GADDAADADT(1)AIINAEGGQNNSEEK	3	-0.25686	1	0.835671	0.813745	0.762136	1.5	1.15954	0.995838	cytoplasm	GO:0007399 nervous system development; GO:0032502 developmental process; GO:0044707 single-multicellular organism process; GO:0048732 gland development; GO:0007420 brain development; GO:0048731 system development; GO:0044699 single-organism process; GO:0032501 multicellular organismal process; GO:0048513 animal organ development; GO:0001889 liver development; GO:0044767 single-organism developmen…	GO:0016020 membrane; GO:0042995 cell projection; GO:0071944 cell periphery; GO:0044425 membrane part; GO:0044464 cell part; GO:0043005 neuron projection; GO:0031224 intrinsic component of membrane; GO:0005623 cell; GO:0016021 integral component of membrane; GO:0097458 neuron part; GO:0005886 plasma membrane;	GO:0050839 cell adhesion molecule binding; GO:0005515 protein binding; GO:0005488 binding;	K06781	CADM1, IGSF4, NECL2, TSLC1; cell adhesion molecule 1	rno04514 Cell adhesion molecules (CAMs) - Rattus norvegicus (rat);	IPR003598; IPR007110; IPR003585; IPR013783; IPR013162; IPR003599; IPR013106;	Immunoglobulin subtype 2; Immunoglobulin-like domain; Neurexin/syndecan/glycophorin C; Immunoglobulin-like fold; CD80-like, immunoglobulin C2-set; Immunoglobulin subtype; Immunoglobulin V-set domain;
Q6P6G9	304	0.634	Down	0.024439	S	Heterogeneous nuclear ribonucleoprotein A1 OS=Rattus norvegicus OX=10116 GN=Hnrnpa1 PE=1 SV=1	Hnrnpa1	0.847493	3.23966e-25	169.33	NQGGYGGSS(0.001)S(0.007)S(0.847)S(0.137)S(0.007)YGSGR	2	0.88419	1	0.766169	0.621704	0.94685	1.28279	1.3008	1.0995	nucleus			GO:0097159 organic cyclic compound binding; GO:1901363 heterocyclic compound binding; GO:1901265 nucleoside phosphate binding; GO:0005488 binding; GO:0003676 nucleic acid binding; GO:0000166 nucleotide binding; GO:0036094 small molecule binding;	K12741	HNRNPA1_3; heterogeneous nuclear ribonucleoprotein A1/A3	rno03040 Spliceosome - Rattus norvegicus (rat);	IPR000504; IPR012677;	RNA recognition motif domain; Nucleotide-binding alpha-beta plait domain;
A0A0G2K4T7	824	1.287	Up	0.023839	S	General transcription factor II-I OS=Rattus norvegicus OX=10116 GN=Gtf2i PE=1 SV=1	Gtf2i	0.893871	0.002194	62.705	ES(0.016)T(0.016)S(0.014)S(0.06)KS(0.894)PPRK	4	-0.24072	2	1.1332	1.05954	1.21274	0.79397	0.874498	0.977756	cytoplasm	GO:0050794 regulation of cellular process; GO:0006725 cellular aromatic compound metabolic process; GO:0097659 nucleic acid-templated transcription; GO:0060255 regulation of macromolecule metabolic process; GO:0019219 regulation of nucleobase-containing compound metabolic process; GO:0009058 biosynthetic process; GO:0044237 cellular metabolic process; GO:0071704 organic substance metabolic proces…	GO:0043226 organelle; GO:0043231 intracellular membrane-bounded organelle; GO:0043229 intracellular organelle; GO:0005634 nucleus; GO:0044464 cell part; GO:0005622 intracellular; GO:0044424 intracellular part; GO:0043227 membrane-bounded organelle; GO:0005623 cell;	GO:0097159 organic cyclic compound binding; GO:1901363 heterocyclic compound binding; GO:0003677 DNA binding; GO:0005488 binding; GO:0003676 nucleic acid binding;	K03121	TFII-I, GTF2I; transcription initiation factor TFII-I	rno03022 Basal transcription factors - Rattus norvegicus (rat); rno04022 cGMP-PKG signaling pathway - Rattus norvegicus (rat);
D4A6X3	74	0.809	Down	0.0069215	S	KN motif and ankyrin repeat domains 4 OS=Rattus norvegicus OX=10116 GN=Kank4 PE=1 SV=1	Kank4	0.999869	0.000397414	97.203	NFS(1)LPNSGDR	3	-0.61892	2	0.872521	0.852525	0.945233	1.11802	1.14173	1.04264	nucleus		GO:0043226 organelle; GO:0005856 cytoskeleton; GO:0043229 intracellular organelle; GO:0015630 microtubule cytoskeleton; GO:0043232 intracellular non-membrane-bounded organelle; GO:0044464 cell part; GO:0005622 intracellular; GO:0005737 cytoplasm; GO:0044424 intracellular part; GO:0005829 cytosol; GO:0005623 cell; GO:0044444 cytoplasmic part; GO:0043228 non-membrane-bounded organelle;	GO:0005515 protein binding; GO:0005488 binding;	K22808			IPR020683;	Ankyrin repeat-containing domain;
D4A6X3	536	0.615	Down	0.00080234	S	KN motif and ankyrin repeat domains 4 OS=Rattus norvegicus OX=10116 GN=Kank4 PE=1 SV=1	Kank4	1	0.000125623	129.82	RES(1)APVIR	2	1.2443	4	0.823418	0.69697	0.749493	1.28346	1.21752	1.18702	nucleus		GO:0043226 organelle; GO:0005856 cytoskeleton; GO:0043229 intracellular organelle; GO:0015630 microtubule cytoskeleton; GO:0043232 intracellular non-membrane-bounded organelle; GO:0044464 cell part; GO:0005622 intracellular; GO:0005737 cytoplasm; GO:0044424 intracellular part; GO:0005829 cytosol; GO:0005623 cell; GO:0044444 cytoplasmic part; GO:0043228 non-membrane-bounded organelle;	GO:0005515 protein binding; GO:0005488 binding;	K22808			IPR020683;	Ankyrin repeat-containing domain;
Q4QQW1	152	0.787	Down	0.04152	S	Receptor expression-enhancing protein 4 OS=Rattus norvegicus OX=10116 GN=Reep4 PE=1 SV=1	Reep4	0.998048	0.000562546	106.16	S(0.002)FS(0.998)MQDLR	2	-1.5208	2	0.900312	0.956797	0.785779	1.13053	1.222	1.00645	plasma membrane	GO:0006997 nucleus organization; GO:0016043 cellular component organization; GO:0000278 mitotic cell cycle; GO:0010256 endomembrane system organization; GO:0007067 mitotic nuclear division; GO:0048285 organelle fission; GO:0044763 single-organism cellular process; GO:0044802 single-organism membrane organization; GO:0044699 single-organism process; GO:1903047 mitotic cell cycle process; GO:000699…	GO:0043229 intracellular organelle; GO:0016020 membrane; GO:0042175 nuclear outer membrane-endoplasmic reticulum membrane network; GO:0099513 polymeric cytoskeletal fiber; GO:0005783 endoplasmic reticulum; GO:0005874 microtubule; GO:0043232 intracellular non-membrane-bounded organelle; GO:0044430 cytoskeletal part; GO:0044446 intracellular organelle part; GO:0005737 cytoplasm; GO:0031224 intrinsi…	GO:0015631 tubulin binding; GO:0005515 protein binding; GO:0008092 cytoskeletal protein binding; GO:0008017 microtubule binding; GO:0005488 binding;	K17338	REEP1_2_3_4; receptor expression-enhancing protein 1/2/3/4
A0A0H2UI14	421	0.814	Down	0.006996	S	F-box/LRR-repeat protein 20 OS=Rattus norvegicus OX=10116 GN=Fbxl20 PE=1 SV=1	Fbxl20	0.902437	0.00720496	62.028	VHAYFAPVT(1)PPPS(0.902)VGGS(0.098)R	3	0.32295	1	0.890233	0.935771	0.877111	1.03109	1.15342	1.1357	cytoplasm	GO:0007610 behavior; GO:0044707 single-multicellular organism process; GO:0006950 response to stress; GO:0001662 behavioral fear response; GO:0044699 single-organism process; GO:0002209 behavioral defense response; GO:0033555 multicellular organismal response to stress; GO:0006952 defense response; GO:0050896 response to stimulus; GO:0032501 multicellular organismal process; GO:0044708 single-org…		GO:0005515 protein binding; GO:0005488 binding;	K10268	FBXL2_20; F-box and leucine-rich repeat protein 2/20		IPR001810; IPR032675;	F-box domain; Leucine-rich repeat domain, L domain-like;
G3V810	603	0.588	Down	0.0066628	S	Myotubularin-related protein 10 OS=Rattus norvegicus OX=10116 GN=Mtmr10 PE=1 SV=1	Mtmr10	1	0.000150582	119.22	RNS(1)LILK	2	0.43221	3	0.668593	0.659664	0.87169	1.24646	1.35679	1.13843	nucleus				K18085	MTMR10_11_12; myotubularin-related protein 10/11/12		IPR029021; IPR022587; IPR011993; IPR010569;	Protein-tyrosine phosphatase-like; Myotubularin-related 12-like C-terminal domain; PH domain-like; Myotubularin-like phosphatase domain;
D4AC16	231	1.206	Up	0.021119	S	TBC1 domain family member 1 OS=Rattus norvegicus OX=10116 GN=Tbc1d1 PE=1 SV=1	Tbc1d1	0.925203	0.000457121	120.04	S(0.075)FS(0.925)QPGLR	2	0.07296	3	1.08553	1.14386	1.092	0.974831	0.832536	0.947569	cytoplasm	GO:0050794 regulation of cellular process; GO:0060627 regulation of vesicle-mediated transport; GO:0046907 intracellular transport; GO:0031338 regulation of vesicle fusion; GO:0015031 protein transport; GO:0051234 establishment of localization; GO:0090630 activation of GTPase activity; GO:0051649 establishment of localization in cell; GO:0051345 positive regulation of hydrolase activity; GO:00328…	GO:0012505 endomembrane system; GO:0005623 cell; GO:0005622 intracellular; GO:0044464 cell part;	GO:0031267 small GTPase binding; GO:0030234 enzyme regulator activity; GO:0017016 Ras GTPase binding; GO:0060589 nucleoside-triphosphatase regulator activity; GO:0005488 binding; GO:0030695 GTPase regulator activity; GO:0005515 protein binding; GO:0098772 molecular function regulator; GO:0051020 GTPase binding; GO:0008047 enzyme activator activity; GO:0019899 enzyme binding; GO:0017137 Rab GTPase…	K18341	TBC1D1; TBC1 domain family member 1	rno04152 AMPK signaling pathway - Rattus norvegicus (rat);	IPR011993; IPR021785; IPR000195; IPR006020;	PH domain-like; Domain of unknown function DUF3350; Rab-GTPase-TBC domain; PTB/PI domain;
Q5RKG9	420	1.485	Up	0.0056783	T	Eukaryotic translation initiation factor 4B OS=Rattus norvegicus OX=10116 GN=Eif4b PE=1 SV=1	Eif4b	0.856237	3.35651e-08	111.93	ERS(0.983)RT(0.856)GS(0.658)ES(0.481)S(0.021)QT(0.001)GTSATSGR	3	-0.78764	1	1.25962	1.1379	1.19877	0.701668	0.86653	0.852736	nucleus	GO:0044085 cellular component biogenesis; GO:0016043 cellular component organization; GO:0022613 ribonucleoprotein complex biogenesis; GO:0006518 peptide metabolic process; GO:0022618 ribonucleoprotein complex assembly; GO:0044267 cellular protein metabolic process; GO:0009058 biosynthetic process; GO:1901566 organonitrogen compound biosynthetic process; GO:0044237 cellular metabolic process; GO:…	GO:0030425 dendrite; GO:0042995 cell projection; GO:0005737 cytoplasm; GO:0043025 neuronal cell body; GO:0032991 macromolecular complex; GO:0044424 intracellular part; GO:0005623 cell; GO:0036477 somatodendritic compartment; GO:0044464 cell part; GO:0005622 intracellular; GO:0043005 neuron projection; GO:0044297 cell body; GO:1990904 ribonucleoprotein complex; GO:0030529 intracellular ribonucleop…	GO:0003723 RNA binding; GO:1901265 nucleoside phosphate binding; GO:0097617 annealing activity; GO:0003725 double-stranded RNA binding; GO:0044877 macromolecular complex binding; GO:0003743 translation initiation factor activity; GO:0034057 RNA strand-exchange activity; GO:0000166 nucleotide binding; GO:0003727 single-stranded RNA binding; GO:1901363 heterocyclic compound binding; GO:0097159 orga…	K03258	EIF4B; translation initiation factor 4B	rno03013 RNA transport - Rattus norvegicus (rat); rno04150 mTOR signaling pathway - Rattus norvegicus (rat); rno04151 PI3K-Akt signaling pathway - Rattus norvegicus (rat); rno05205 Proteoglycans in cancer - Rattus norvegicus (rat);	IPR000504; IPR012677;	RNA recognition motif domain; Nucleotide-binding alpha-beta plait domain;
Q5RKG9	283	0.657	Down	0.03162	S	Eukaryotic translation initiation factor 4B OS=Rattus norvegicus OX=10116 GN=Eif4b PE=1 SV=1	Eif4b	0.999146	0.0099691	64.42	AFGS(0.999)GY(0.001)R	2	0.30445	1	0.845192	0.62004	0.903689	1.05397	1.27618	1.27562	nucleus	GO:0044085 cellular component biogenesis; GO:0016043 cellular component organization; GO:0022613 ribonucleoprotein complex biogenesis; GO:0006518 peptide metabolic process; GO:0022618 ribonucleoprotein complex assembly; GO:0044267 cellular protein metabolic process; GO:0009058 biosynthetic process; GO:1901566 organonitrogen compound biosynthetic process; GO:0044237 cellular metabolic process; GO:…	GO:0030425 dendrite; GO:0042995 cell projection; GO:0005737 cytoplasm; GO:0043025 neuronal cell body; GO:0032991 macromolecular complex; GO:0044424 intracellular part; GO:0005623 cell; GO:0036477 somatodendritic compartment; GO:0044464 cell part; GO:0005622 intracellular; GO:0043005 neuron projection; GO:0044297 cell body; GO:1990904 ribonucleoprotein complex; GO:0030529 intracellular ribonucleop…	GO:0003723 RNA binding; GO:1901265 nucleoside phosphate binding; GO:0097617 annealing activity; GO:0003725 double-stranded RNA binding; GO:0044877 macromolecular complex binding; GO:0003743 translation initiation factor activity; GO:0034057 RNA strand-exchange activity; GO:0000166 nucleotide binding; GO:0003727 single-stranded RNA binding; GO:1901363 heterocyclic compound binding; GO:0097159 orga…	K03258	EIF4B; translation initiation factor 4B	rno03013 RNA transport - Rattus norvegicus (rat); rno04150 mTOR signaling pathway - Rattus norvegicus (rat); rno04151 PI3K-Akt signaling pathway - Rattus norvegicus (rat); rno05205 Proteoglycans in cancer - Rattus norvegicus (rat);	IPR000504; IPR012677;	RNA recognition motif domain; Nucleotide-binding alpha-beta plait domain;
Q5RKG9	418	1.438	Up	0.0073847	S	Eukaryotic translation initiation factor 4B OS=Rattus norvegicus OX=10116 GN=Eif4b PE=1 SV=1	Eif4b	0.982846	1.97584e-16	139	ERS(0.983)RT(0.856)GS(0.658)ES(0.481)S(0.021)QT(0.001)GTSATSGR	3	-0.78764	2	1.25577	1.09028	1.20389	0.734053	0.899384	0.835821	nucleus	GO:0044085 cellular component biogenesis; GO:0016043 cellular component organization; GO:0022613 ribonucleoprotein complex biogenesis; GO:0006518 peptide metabolic process; GO:0022618 ribonucleoprotein complex assembly; GO:0044267 cellular protein metabolic process; GO:0009058 biosynthetic process; GO:1901566 organonitrogen compound biosynthetic process; GO:0044237 cellular metabolic process; GO:…	GO:0030425 dendrite; GO:0042995 cell projection; GO:0005737 cytoplasm; GO:0043025 neuronal cell body; GO:0032991 macromolecular complex; GO:0044424 intracellular part; GO:0005623 cell; GO:0036477 somatodendritic compartment; GO:0044464 cell part; GO:0005622 intracellular; GO:0043005 neuron projection; GO:0044297 cell body; GO:1990904 ribonucleoprotein complex; GO:0030529 intracellular ribonucleop…	GO:0003723 RNA binding; GO:1901265 nucleoside phosphate binding; GO:0097617 annealing activity; GO:0003725 double-stranded RNA binding; GO:0044877 macromolecular complex binding; GO:0003743 translation initiation factor activity; GO:0034057 RNA strand-exchange activity; GO:0000166 nucleotide binding; GO:0003727 single-stranded RNA binding; GO:1901363 heterocyclic compound binding; GO:0097159 orga…	K03258	EIF4B; translation initiation factor 4B	rno03013 RNA transport - Rattus norvegicus (rat); rno04150 mTOR signaling pathway - Rattus norvegicus (rat); rno04151 PI3K-Akt signaling pathway - Rattus norvegicus (rat); rno05205 Proteoglycans in cancer - Rattus norvegicus (rat);	IPR000504; IPR012677;	RNA recognition motif domain; Nucleotide-binding alpha-beta plait domain;
Q5RKG9	504	1.246	Up	0.0088353	S	Eukaryotic translation initiation factor 4B OS=Rattus norvegicus OX=10116 GN=Eif4b PE=1 SV=1	Eif4b	0.990795	5.31685e-32	190.72	S(0.047)QS(0.171)S(0.758)DT(0.023)EQPS(0.991)PT(0.008)S(0.001)GGGK	3	-0.14359	5	1.10769	1.05853	1.17213	0.907753	0.938398	0.832836	nucleus	GO:0044085 cellular component biogenesis; GO:0016043 cellular component organization; GO:0022613 ribonucleoprotein complex biogenesis; GO:0006518 peptide metabolic process; GO:0022618 ribonucleoprotein complex assembly; GO:0044267 cellular protein metabolic process; GO:0009058 biosynthetic process; GO:1901566 organonitrogen compound biosynthetic process; GO:0044237 cellular metabolic process; GO:…	GO:0030425 dendrite; GO:0042995 cell projection; GO:0005737 cytoplasm; GO:0043025 neuronal cell body; GO:0032991 macromolecular complex; GO:0044424 intracellular part; GO:0005623 cell; GO:0036477 somatodendritic compartment; GO:0044464 cell part; GO:0005622 intracellular; GO:0043005 neuron projection; GO:0044297 cell body; GO:1990904 ribonucleoprotein complex; GO:0030529 intracellular ribonucleop…	GO:0003723 RNA binding; GO:1901265 nucleoside phosphate binding; GO:0097617 annealing activity; GO:0003725 double-stranded RNA binding; GO:0044877 macromolecular complex binding; GO:0003743 translation initiation factor activity; GO:0034057 RNA strand-exchange activity; GO:0000166 nucleotide binding; GO:0003727 single-stranded RNA binding; GO:1901363 heterocyclic compound binding; GO:0097159 orga…	K03258	EIF4B; translation initiation factor 4B	rno03013 RNA transport - Rattus norvegicus (rat); rno04150 mTOR signaling pathway - Rattus norvegicus (rat); rno04151 PI3K-Akt signaling pathway - Rattus norvegicus (rat); rno05205 Proteoglycans in cancer - Rattus norvegicus (rat);	IPR000504; IPR012677;	RNA recognition motif domain; Nucleotide-binding alpha-beta plait domain;
D4A5B3	339	0.678	Down	0.048863	T	C2 calcium-dependent domain-containing 5 OS=Rattus norvegicus OX=10116 GN=C2cd5 PE=1 SV=1	C2cd5	0.999515	8.2669e-05	119.65	QQT(1)QSALEQR	3	-0.81482	2	0.888454	0.749757	0.792023	1.48178	1.13471	0.967314	nucleus			GO:0005515 protein binding; GO:0005488 binding;				IPR000008;	C2 domain;
Q9JKL8	971	1.232	Up	0.042364	S	Activity-dependent neuroprotector homeobox protein OS=Rattus norvegicus OX=10116 GN=Adnp PE=1 SV=2	Adnp	0.999351	3.23134e-07	127.44	DGAS(0.999)PS(0.999)ES(0.001)GPGSR	2	-0.43986	4	1.1846	1.13467	1.00718	0.917396	0.969849	0.813883	nucleus	GO:0010941 regulation of cell death; GO:0065008 regulation of biological quality; GO:0032270 positive regulation of cellular protein metabolic process; GO:0022414 reproductive process; GO:0097659 nucleic acid-templated transcription; GO:0051965 positive regulation of synapse assembly; GO:0043523 regulation of neuron apoptotic process; GO:0009891 positive regulation of biosynthetic process; GO:003…	GO:0043229 intracellular organelle; GO:0030425 dendrite; GO:0005615 extracellular space; GO:0044421 extracellular region part; GO:0042995 cell projection; GO:0005737 cytoplasm; GO:0043025 neuronal cell body; GO:0044424 intracellular part; GO:0005623 cell; GO:0005576 extracellular region; GO:0043226 organelle; GO:0043231 intracellular membrane-bounded organelle; GO:0030424 axon; GO:0005634 nucleus…	GO:0003677 DNA binding; GO:0043167 ion binding; GO:0015631 tubulin binding; GO:0005515 protein binding; GO:0048487 beta-tubulin binding; GO:0033218 amide binding; GO:0005507 copper ion binding; GO:0003682 chromatin binding; GO:1901363 heterocyclic compound binding; GO:0097159 organic cyclic compound binding; GO:0008092 cytoskeletal protein binding; GO:0046914 transition metal ion binding; GO:0042…	K22591			IPR015880; IPR001356; IPR009057; IPR007087;	Zinc finger, C2H2-like; Homeobox domain; Homeobox domain-like; Zinc finger, C2H2;
A0A0G2K0Q7	1812	0.747	Down	0.00106421	T	Myosin light chain kinase OS=Rattus norvegicus OX=10116 GN=Mylk PE=1 SV=1	Mylk	0.752707	7.80915e-08	113.82	KS(0.387)S(0.387)T(0.145)GS(0.183)PT(0.753)S(0.144)PINAEK	4	0.89125	2	0.845351	0.802495	0.893184	1.15582	1.0997	1.148	cytoplasm	GO:0016310 phosphorylation; GO:0044267 cellular protein metabolic process; GO:0044238 primary metabolic process; GO:0044237 cellular metabolic process; GO:0006796 phosphate-containing compound metabolic process; GO:0071704 organic substance metabolic process; GO:0008152 metabolic process; GO:0006468 protein phosphorylation; GO:0006793 phosphorus metabolic process; GO:0044260 cellular macromolecul…		GO:0005524 ATP binding; GO:1901265 nucleoside phosphate binding; GO:0016773 phosphotransferase activity, alcohol group as acceptor; GO:0001882 nucleoside binding; GO:0043167 ion binding; GO:0005515 protein binding; GO:0004672 protein kinase activity; GO:0000166 nucleotide binding; GO:0097159 organic cyclic compound binding; GO:1901363 heterocyclic compound binding; GO:0032549 ribonucleoside bindi…	K00907	MYLK; myosin-light-chain kinase [EC:2.7.11.18]	rno04020 Calcium signaling pathway - Rattus norvegicus (rat); rno04022 cGMP-PKG signaling pathway - Rattus norvegicus (rat); rno04270 Vascular smooth muscle contraction - Rattus norvegicus (rat); rno04371 Apelin signaling pathway - Rattus norvegicus (rat); rno04510 Focal adhesion - Rattus norvegicus (rat); rno04611 Platelet activation - Rattus norvegicus (rat); rno04810 Regulation of actin cytosk…	IPR003598; IPR007110; IPR000719; IPR013783; IPR003599; IPR003961; IPR013098; IPR011009;	Immunoglobulin subtype 2; Immunoglobulin-like domain; Protein kinase domain; Immunoglobulin-like fold; Immunoglobulin subtype; Fibronectin type III; Immunoglobulin I-set; Protein kinase-like domain;
F1LUB7	237	0.563	Down	0.0153611	S	Anion exchange protein OS=Rattus norvegicus OX=10116 GN=Slc4a8 PE=3 SV=3	Slc4a8	1	0.00136149	96.143	S(1)FAEVGK	2	1.4726	1	0.657309	0.622115	0.877654	1.1236	1.52343	1.18426	plasma membrane	GO:0006820 anion transport; GO:0006810 transport; GO:0055085 transmembrane transport; GO:0034220 ion transmembrane transport; GO:0006811 ion transport; GO:0051179 localization; GO:0015698 inorganic anion transport; GO:0098656 anion transmembrane transport; GO:0051234 establishment of localization;	GO:0016020 membrane; GO:0036477 somatodendritic compartment; GO:0042995 cell projection; GO:0044459 plasma membrane part; GO:0071944 cell periphery; GO:0044425 membrane part; GO:0044464 cell part; GO:0044298 cell body membrane; GO:0043025 neuronal cell body; GO:0043005 neuron projection; GO:0031224 intrinsic component of membrane; GO:0044297 cell body; GO:0005623 cell; GO:0016021 integral compone…	GO:0022804 active transmembrane transporter activity; GO:0015291 secondary active transmembrane transporter activity; GO:0005452 inorganic anion exchanger activity; GO:0015075 ion transmembrane transporter activity; GO:0022892 substrate-specific transporter activity; GO:0015103 inorganic anion transmembrane transporter activity; GO:0008509 anion transmembrane transporter activity; GO:0022891 subs…	K13861	SLC4A10, NCBE; solute carrier family 4 (sodium bicarbonate transporter), member 10		IPR011531; IPR013769; IPR016152;	Bicarbonate transporter, C-terminal; Band 3 cytoplasmic domain; Phosphotransferase/anion transporter;
A0A0G2JW88	1744	1.305	Up	0.037462	S	Microtubule-associated protein OS=Rattus norvegicus OX=10116 GN=Map4 PE=1 SV=1	Map4	1	0.000316427	89.805	ELPPS(1)PEKK	3	-0.19128	19	1.08181	1.31203	1.03462	0.800344	0.929057	0.897849	nucleus		GO:0043229 intracellular organelle; GO:0099513 polymeric cytoskeletal fiber; GO:0005874 microtubule; GO:0043232 intracellular non-membrane-bounded organelle; GO:0044430 cytoskeletal part; GO:0005737 cytoplasm; GO:0044446 intracellular organelle part; GO:0099512 supramolecular fiber; GO:0044424 intracellular part; GO:0099080 supramolecular complex; GO:0005623 cell; GO:0044422 organelle part; GO:00…	GO:0015631 tubulin binding; GO:0005515 protein binding; GO:0008092 cytoskeletal protein binding; GO:0005488 binding;	K10431	MAP4; microtubule-associated protein 4
A0A0G2JW88	618	1.321	Up	0.024918	S	Microtubule-associated protein OS=Rattus norvegicus OX=10116 GN=Map4 PE=1 SV=1	Map4	1	5.24142e-17	171.81	STLPVDEGS(1)PLEK	3	-0.15559	4	1.10441	1.27318	1.06827	0.77969	0.955296	0.873656	nucleus		GO:0043229 intracellular organelle; GO:0099513 polymeric cytoskeletal fiber; GO:0005874 microtubule; GO:0043232 intracellular non-membrane-bounded organelle; GO:0044430 cytoskeletal part; GO:0005737 cytoplasm; GO:0044446 intracellular organelle part; GO:0099512 supramolecular fiber; GO:0044424 intracellular part; GO:0099080 supramolecular complex; GO:0005623 cell; GO:0044422 organelle part; GO:00…	GO:0015631 tubulin binding; GO:0005515 protein binding; GO:0008092 cytoskeletal protein binding; GO:0005488 binding;	K10431	MAP4; microtubule-associated protein 4
A0A0G2JW88	509	1.345	Up	0.029218	S	Microtubule-associated protein OS=Rattus norvegicus OX=10116 GN=Map4 PE=1 SV=1	Map4	0.999814	1.69239e-24	157.63	VTEFNNVTPLS(1)EEEVASIK	3	-1.3298	2	1.08934	1.34962	1.0375	0.830465	0.833819	0.920251	nucleus		GO:0043229 intracellular organelle; GO:0099513 polymeric cytoskeletal fiber; GO:0005874 microtubule; GO:0043232 intracellular non-membrane-bounded organelle; GO:0044430 cytoskeletal part; GO:0005737 cytoplasm; GO:0044446 intracellular organelle part; GO:0099512 supramolecular fiber; GO:0044424 intracellular part; GO:0099080 supramolecular complex; GO:0005623 cell; GO:0044422 organelle part; GO:00…	GO:0015631 tubulin binding; GO:0005515 protein binding; GO:0008092 cytoskeletal protein binding; GO:0005488 binding;	K10431	MAP4; microtubule-associated protein 4
A0A0G2JW88	2050	0.763	Down	0.00024282	S	Microtubule-associated protein OS=Rattus norvegicus OX=10116 GN=Map4 PE=1 SV=1	Map4	0.863267	0.000200632	88.768	KVS(0.863)Y(0.001)S(0.136)HIQSK	4	0.18361	2	0.855759	0.854637	0.824039	1.10155	1.14383	1.07527	nucleus		GO:0043229 intracellular organelle; GO:0099513 polymeric cytoskeletal fiber; GO:0005874 microtubule; GO:0043232 intracellular non-membrane-bounded organelle; GO:0044430 cytoskeletal part; GO:0005737 cytoplasm; GO:0044446 intracellular organelle part; GO:0099512 supramolecular fiber; GO:0044424 intracellular part; GO:0099080 supramolecular complex; GO:0005623 cell; GO:0044422 organelle part; GO:00…	GO:0015631 tubulin binding; GO:0005515 protein binding; GO:0008092 cytoskeletal protein binding; GO:0005488 binding;	K10431	MAP4; microtubule-associated protein 4
G3V852	144	0.335	Down	0.025822	T	RCG55135, isoform CRA_b OS=Rattus norvegicus OX=10116 GN=Tln1 PE=1 SV=1	Tln1	0.942132	0.0168016	47.774	KDEGT(0.058)GT(0.942)LRK	4	-0.29991	1	0.456607	0.416254	0.639216	2.12237	1.55443	0.841351	cytoplasm,nucleus	GO:0044085 cellular component biogenesis; GO:0044707 single-multicellular organism process; GO:0016043 cellular component organization; GO:0034329 cell junction assembly; GO:0007596 blood coagulation; GO:0065008 regulation of biological quality; GO:0007016 cytoskeletal anchoring at plasma membrane; GO:0044699 single-organism process; GO:0050896 response to stimulus; GO:0030865 cortical cytoskelet…	GO:0031252 cell leading edge; GO:0043229 intracellular organelle; GO:0042995 cell projection; GO:0044421 extracellular region part; GO:0043232 intracellular non-membrane-bounded organelle; GO:0030054 cell junction; GO:0031982 vesicle; GO:0070161 anchoring junction; GO:0044424 intracellular part; GO:0005623 cell; GO:0005576 extracellular region; GO:0043228 non-membrane-bounded organelle; GO:004322…	GO:0051015 actin filament binding; GO:0005102 receptor binding; GO:0044877 macromolecular complex binding; GO:0030274 LIM domain binding; GO:0005178 integrin binding; GO:0005515 protein binding; GO:0050839 cell adhesion molecule binding; GO:0008092 cytoskeletal protein binding; GO:0005200 structural constituent of cytoskeleton; GO:0005488 binding; GO:0017166 vinculin binding; GO:0045296 cadherin …	K06271	TLN; talin	rno04015 Rap1 signaling pathway - Rattus norvegicus (rat); rno04510 Focal adhesion - Rattus norvegicus (rat); rno04611 Platelet activation - Rattus norvegicus (rat); rno05166 Human T-cell leukemia virus 1 infection - Rattus norvegicus (rat);	IPR019748; IPR002558; IPR015224; IPR032425; IPR019749; IPR018979; IPR015009; IPR011993; IPR029071; IPR014352; IPR000299;	FERM central domain; I/LWEQ domain; Talin, central; Talin, N-terminal F0 domain; Band 4.1 domain; FERM, N-terminal; Vinculin-binding site-containing domain; PH domain-like; Ubiquitin-related domain; FERM/acyl-CoA-binding protein, 3-helical bundle; FERM domain;
D3ZKD3	362	0.69	Down	0.019978	S	RNA demethylase ALKBH5 OS=Rattus norvegicus OX=10116 GN=Alkbh5 PE=1 SV=1	Alkbh5	0.998529	5.23901e-06	133.48	RGS(0.999)FS(0.001)SENYWR	2	-2.2159	2	0.801786	0.759277	1.03144	1.27912	1.31163	1.1652	plasma membrane	GO:0050658 RNA transport; GO:0070989 oxidative demethylation; GO:0022414 reproductive process; GO:0048869 cellular developmental process; GO:0044699 single-organism process; GO:0051168 nuclear export; GO:0051169 nuclear transport; GO:0009451 RNA modification; GO:0044237 cellular metabolic process; GO:0015031 protein transport; GO:0051234 establishment of localization; GO:0071427 mRNA-containing r…	GO:0043229 intracellular organelle; GO:0044446 intracellular organelle part; GO:0005737 cytoplasm; GO:0012505 endomembrane system; GO:0031981 nuclear lumen; GO:0044424 intracellular part; GO:0016604 nuclear body; GO:0005829 cytosol; GO:0005623 cell; GO:0044422 organelle part; GO:0043231 intracellular membrane-bounded organelle; GO:0043226 organelle; GO:0031974 membrane-enclosed lumen; GO:0005654 …	GO:0003723 RNA binding; GO:0043167 ion binding; GO:0016705 oxidoreductase activity, acting on paired donors, with incorporation or reduction of molecular oxygen; GO:0016706 oxidoreductase activity, acting on paired donors, with incorporation or reduction of molecular oxygen, 2-oxoglutarate as one donor, and incorporation of one atom each of oxygen into both donors; GO:0032451 demethylase activity…	K10767	ALKBH5; mRNA N6-methyladenine demethylase [EC:1.14.11.53]		IPR027450;	Alpha-ketoglutarate-dependent dioxygenase AlkB-like;
D3ZKD3	385	0.76	Down	0.0152041	S	RNA demethylase ALKBH5 OS=Rattus norvegicus OX=10116 GN=Alkbh5 PE=1 SV=1	Alkbh5	0.99771	1.22885e-69	260.03	KSYESSEDCPEAAS(0.002)S(0.998)PTR	3	0.11759	8	0.88125	0.870599	0.977688	1.29296	1.22558	1.07159	plasma membrane	GO:0050658 RNA transport; GO:0070989 oxidative demethylation; GO:0022414 reproductive process; GO:0048869 cellular developmental process; GO:0044699 single-organism process; GO:0051168 nuclear export; GO:0051169 nuclear transport; GO:0009451 RNA modification; GO:0044237 cellular metabolic process; GO:0015031 protein transport; GO:0051234 establishment of localization; GO:0071427 mRNA-containing r…	GO:0043229 intracellular organelle; GO:0044446 intracellular organelle part; GO:0005737 cytoplasm; GO:0012505 endomembrane system; GO:0031981 nuclear lumen; GO:0044424 intracellular part; GO:0016604 nuclear body; GO:0005829 cytosol; GO:0005623 cell; GO:0044422 organelle part; GO:0043231 intracellular membrane-bounded organelle; GO:0043226 organelle; GO:0031974 membrane-enclosed lumen; GO:0005654 …	GO:0003723 RNA binding; GO:0043167 ion binding; GO:0016705 oxidoreductase activity, acting on paired donors, with incorporation or reduction of molecular oxygen; GO:0016706 oxidoreductase activity, acting on paired donors, with incorporation or reduction of molecular oxygen, 2-oxoglutarate as one donor, and incorporation of one atom each of oxygen into both donors; GO:0032451 demethylase activity…	K10767	ALKBH5; mRNA N6-methyladenine demethylase [EC:1.14.11.53]		IPR027450;	Alpha-ketoglutarate-dependent dioxygenase AlkB-like;
D3ZKD3	70	0.768	Down	0.011622	S	RNA demethylase ALKBH5 OS=Rattus norvegicus OX=10116 GN=Alkbh5 PE=1 SV=1	Alkbh5	1	8.33408e-46	209.96	YQEDS(1)DPERS(1)DYEEHQLQKEEEAR	4	-1.2528	6	0.863393	0.914367	0.964503	1.30911	1.15581	1.10683	plasma membrane	GO:0050658 RNA transport; GO:0070989 oxidative demethylation; GO:0022414 reproductive process; GO:0048869 cellular developmental process; GO:0044699 single-organism process; GO:0051168 nuclear export; GO:0051169 nuclear transport; GO:0009451 RNA modification; GO:0044237 cellular metabolic process; GO:0015031 protein transport; GO:0051234 establishment of localization; GO:0071427 mRNA-containing r…	GO:0043229 intracellular organelle; GO:0044446 intracellular organelle part; GO:0005737 cytoplasm; GO:0012505 endomembrane system; GO:0031981 nuclear lumen; GO:0044424 intracellular part; GO:0016604 nuclear body; GO:0005829 cytosol; GO:0005623 cell; GO:0044422 organelle part; GO:0043231 intracellular membrane-bounded organelle; GO:0043226 organelle; GO:0031974 membrane-enclosed lumen; GO:0005654 …	GO:0003723 RNA binding; GO:0043167 ion binding; GO:0016705 oxidoreductase activity, acting on paired donors, with incorporation or reduction of molecular oxygen; GO:0016706 oxidoreductase activity, acting on paired donors, with incorporation or reduction of molecular oxygen, 2-oxoglutarate as one donor, and incorporation of one atom each of oxygen into both donors; GO:0032451 demethylase activity…	K10767	ALKBH5; mRNA N6-methyladenine demethylase [EC:1.14.11.53]		IPR027450;	Alpha-ketoglutarate-dependent dioxygenase AlkB-like;
D3ZKD3	372	0.717	Down	0.0070371	S	RNA demethylase ALKBH5 OS=Rattus norvegicus OX=10116 GN=Alkbh5 PE=1 SV=1	Alkbh5	0.99999	9.49386e-59	251.91	KS(1)YESSEDCPEAASSPTR	3	1.469	5	0.910714	0.803045	0.927992	1.34025	1.14302	1.20154	plasma membrane	GO:0050658 RNA transport; GO:0070989 oxidative demethylation; GO:0022414 reproductive process; GO:0048869 cellular developmental process; GO:0044699 single-organism process; GO:0051168 nuclear export; GO:0051169 nuclear transport; GO:0009451 RNA modification; GO:0044237 cellular metabolic process; GO:0015031 protein transport; GO:0051234 establishment of localization; GO:0071427 mRNA-containing r…	GO:0043229 intracellular organelle; GO:0044446 intracellular organelle part; GO:0005737 cytoplasm; GO:0012505 endomembrane system; GO:0031981 nuclear lumen; GO:0044424 intracellular part; GO:0016604 nuclear body; GO:0005829 cytosol; GO:0005623 cell; GO:0044422 organelle part; GO:0043231 intracellular membrane-bounded organelle; GO:0043226 organelle; GO:0031974 membrane-enclosed lumen; GO:0005654 …	GO:0003723 RNA binding; GO:0043167 ion binding; GO:0016705 oxidoreductase activity, acting on paired donors, with incorporation or reduction of molecular oxygen; GO:0016706 oxidoreductase activity, acting on paired donors, with incorporation or reduction of molecular oxygen, 2-oxoglutarate as one donor, and incorporation of one atom each of oxygen into both donors; GO:0032451 demethylase activity…	K10767	ALKBH5; mRNA N6-methyladenine demethylase [EC:1.14.11.53]		IPR027450;	Alpha-ketoglutarate-dependent dioxygenase AlkB-like;
A0A0G2K5M6	343	0.743	Down	0.029497	S	Proline-rich 12 OS=Rattus norvegicus OX=10116 GN=Prr12 PE=1 SV=1	Prr12	1	1.44941e-36	186.59	AAGPETAGGGAAAGGGGYRPIIQS(1)PGYK	4	0.91899	1	0.802933	0.776908	0.983211	1.10671	1.2709	1.07129	nucleus							IPR025451;	Domain of unknown function DUF4211;
G3V917	434	1.354	Up	0.0093637	S	Protein TANC1 OS=Rattus norvegicus OX=10116 GN=Tanc1 PE=1 SV=3	Tanc1	0.909888	5.50944e-06	110.04	QIAS(0.001)S(0.064)S(0.91)PS(0.017)S(0.006)S(0.002)LK	2	0.89288	1	1.13307	1.28918	1.05732	0.869084	0.888211	0.812008	nucleus	GO:0016043 cellular component organization; GO:0044707 single-multicellular organism process; GO:0014902 myotube differentiation; GO:0043954 cellular component maintenance; GO:0097061 dendritic spine organization; GO:0009628 response to abiotic stimulus; GO:0048869 cellular developmental process; GO:0044699 single-organism process; GO:0050896 response to stimulus; GO:0006949 syncytium formation; …	GO:0030425 dendrite; GO:0042995 cell projection; GO:0043025 neuronal cell body; GO:0044463 cell projection part; GO:0005623 cell; GO:0043679 axon terminus; GO:0045202 synapse; GO:0036477 somatodendritic compartment; GO:0044464 cell part; GO:0098793 presynapse; GO:0043005 neuron projection; GO:0044297 cell body; GO:0044306 neuron projection terminus; GO:0097458 neuron part; GO:0044456 synapse part;	GO:0005515 protein binding; GO:0005488 binding;				IPR011990; IPR020683; IPR013026;	Tetratricopeptide-like helical domain; Ankyrin repeat-containing domain; Tetratricopeptide repeat-containing domain;
Q5XI04	7	1.762	Up	0.0059615	S	RCG45489, isoform CRA_a OS=Rattus norvegicus OX=10116 GN=Stom PE=1 SV=1	Stom	0.999839	0.00101058	72.615	RQS(1)GHVQSQR	3	2.0638	1	1.18651	1.151	1.56982	0.69594	0.783864	0.738119	cytoplasm	GO:0044085 cellular component biogenesis; GO:0065008 regulation of biological quality; GO:0044827 modulation by host of viral genome replication; GO:1903533 regulation of protein targeting; GO:0023051 regulation of signaling; GO:0035821 modification of morphology or physiology of other organism; GO:0010469 regulation of receptor activity; GO:0010646 regulation of cell communication; GO:0022607 ce…	GO:0016020 membrane; GO:0005615 extracellular space; GO:0044421 extracellular region part; GO:0005783 endoplasmic reticulum; GO:0098857 membrane microdomain; GO:0071944 cell periphery; GO:0031982 vesicle; GO:0005737 cytoplasm; GO:0031224 intrinsic component of membrane; GO:0044424 intracellular part; GO:0005887 integral component of plasma membrane; GO:0005623 cell; GO:0043228 non-membrane-bounde…	GO:0005515 protein binding; GO:0042802 identical protein binding; GO:0070063 RNA polymerase binding; GO:0042803 protein homodimerization activity; GO:0019899 enzyme binding; GO:0005488 binding; GO:0046983 protein dimerization activity;	K17286	STOM; erythrocyte band 7 integral membrane protein		IPR001107;	Band 7 domain;
A0A0G2K3J4	1046	0.597	Down	0.00162081	S	A-kinase anchor protein SPHKAP OS=Rattus norvegicus OX=10116 GN=Sphkap PE=1 SV=1	Sphkap	0.999999	3.32756e-06	90.98	VMDES(1)MNLEDIPDSVSTFANEVAAK	4	-0.16135	1	0.740666	0.724753	0.789784	1.41642	1.15479	1.20329	nucleus							IPR018292;	A-kinase anchor 110kDa, C-terminal;
A0A0G2K3J4	1138	0.705	Down	0.030381	S	A-kinase anchor protein SPHKAP OS=Rattus norvegicus OX=10116 GN=Sphkap PE=1 SV=1	Sphkap	0.975657	1.42559e-05	91.249	AS(0.005)S(0.018)VS(0.976)KQS(0.239)S(0.764)CES(0.937)IT(0.062)DEFSR	3	-1.8965	1	0.702321	0.812871	0.977407	1.24424	1.22811	1.0616	nucleus							IPR018292;	A-kinase anchor 110kDa, C-terminal;
A0A0G2K3J4	618	0.693	Down	0.009082	S	A-kinase anchor protein SPHKAP OS=Rattus norvegicus OX=10116 GN=Sphkap PE=1 SV=1	Sphkap	0.855672	5.29973e-13	134.4	S(0.072)S(0.072)IGS(0.856)LVT(0.001)EESTELGK	3	0.50886	1	0.873865	0.762376	0.831041	1.12312	1.34521	1.09035	nucleus							IPR018292;	A-kinase anchor 110kDa, C-terminal;
A0A0G2K3J4	305	0.761	Down	0.00149958	S	A-kinase anchor protein SPHKAP OS=Rattus norvegicus OX=10116 GN=Sphkap PE=1 SV=1	Sphkap	0.977781	1.54498e-07	98.002	T(0.022)ERS(0.978)KENTAENTALQSLNPSAR	3	1.5052	1	0.918264	0.842574	0.843811	1.12412	1.18941	1.11088	nucleus							IPR018292;	A-kinase anchor 110kDa, C-terminal;
A0A0G2K3J4	1106	0.752	Down	0.0095029	S	A-kinase anchor protein SPHKAP OS=Rattus norvegicus OX=10116 GN=Sphkap PE=1 SV=1	Sphkap	1	5.78832e-79	284.9	ASS(1)CES(1)IPEEDSEAR	2	0.054805	6	0.882946	0.806931	0.902751	1.26326	1.06925	1.11499	nucleus							IPR018292;	A-kinase anchor 110kDa, C-terminal;
F7DLY1	458	0.75	Down	0.0163359	S	EPS8-like 2 OS=Rattus norvegicus OX=10116 GN=Eps8l2 PE=1 SV=2	Eps8l2	1	0.00197851	76.073	LS(1)VRHS(1)PK	3	0.35874	2	0.837367	0.782	0.984733	1.13946	1.21647	1.1155	nucleus	GO:0044700 single organism signaling; GO:0050794 regulation of cellular process; GO:0060491 regulation of cell projection assembly; GO:0023051 regulation of signaling; GO:0044699 single-organism process; GO:0046578 regulation of Ras protein signal transduction; GO:0031344 regulation of cell projection organization; GO:0044087 regulation of cellular component biogenesis; GO:0050896 response to sti…	GO:0016020 membrane; GO:0031252 cell leading edge; GO:0042995 cell projection; GO:0044421 extracellular region part; GO:0071944 cell periphery; GO:0032587 ruffle membrane; GO:0005737 cytoplasm; GO:0031982 vesicle; GO:0032991 macromolecular complex; GO:0044424 intracellular part; GO:0005829 cytosol; GO:0005623 cell; GO:0044463 cell projection part; GO:0005576 extracellular region; GO:0005886 plasm…	GO:0050839 cell adhesion molecule binding; GO:0008092 cytoskeletal protein binding; GO:0030676 Rac guanyl-nucleotide exchange factor activity; GO:0005085 guanyl-nucleotide exchange factor activity; GO:0005488 binding; GO:0045296 cadherin binding; GO:0003779 actin binding; GO:0005088 Ras guanyl-nucleotide exchange factor activity; GO:0005515 protein binding; GO:0098772 molecular function regulator…	K17277	EPS8; epidermal growth factor receptor kinase substrate 8		IPR013625; IPR001452; IPR011993; IPR006020; IPR033928;	Tensin/EPS8 phosphotyrosine-binding domain; SH3 domain; PH domain-like; PTB/PI domain; Epidermal growth factor receptor kinase substrate, phosphotyrosine-binding domain;
A0A0G2JUR5	371	0.59	Down	0.031101	T	Myosin phosphatase Rho-interacting protein OS=Rattus norvegicus OX=10116 GN=Mprip PE=1 SV=1	Mprip	0.998188	1.66954e-24	156.92	S(0.002)KT(0.998)FDWAEFRPIQQALAQER	4	-2.3202	2	0.669102	0.561765	0.969886	1.22474	1.36275	1.14101	nucleus							IPR011993; IPR001849;	PH domain-like; Pleckstrin homology domain;
A0A1W2Q678	685	0.807	Down	0.0049174	S	Uncharacterized protein OS=Rattus norvegicus OX=10116 GN=FAM120C PE=1 SV=1	FAM120C	0.999988	3.12412e-07	103.4	GS(1)FGMQVVSVGGPGK	3	-0.40526	3	0.867076	0.853731	0.948718	1.13875	1.10721	1.06387	nucleus
P19945	307	1.266	Up	0.0115199	S	60S acidic ribosomal protein P0 OS=Rattus norvegicus OX=10116 GN=Rplp0 PE=1 SV=2	Rplp0	1	1.39355e-64	250.08	VEAKEES(1)EES(1)DEDMGFGLFD	3	1.4702	63	1.09378	1.2101	1.06947	0.823985	0.932308	0.907801	cytoplasm,nucleus	GO:0044085 cellular component biogenesis; GO:0044707 single-multicellular organism process; GO:0022613 ribonucleoprotein complex biogenesis; GO:0065008 regulation of biological quality; GO:0048732 gland development; GO:0071310 cellular response to organic substance; GO:1901700 response to oxygen-containing compound; GO:0046683 response to organophosphorus; GO:0044699 single-organism process; GO:0…	GO:0005840 ribosome; GO:0043229 intracellular organelle; GO:0016020 membrane; GO:0030425 dendrite; GO:0042995 cell projection; GO:0043232 intracellular non-membrane-bounded organelle; GO:0005737 cytoplasm; GO:0032991 macromolecular complex; GO:0044424 intracellular part; GO:0005623 cell; GO:0043228 non-membrane-bounded organelle; GO:0043231 intracellular membrane-bounded organelle; GO:0043226 org…	GO:0033218 amide binding; GO:0042277 peptide binding; GO:0005488 binding;	K02941	RP-LP0, RPLP0; large subunit ribosomal protein LP0	rno03010 Ribosome - Rattus norvegicus (rat);
Q5EB62	35	0.803	Down	0.0173403	S	Solute carrier family 25 member 46 OS=Rattus norvegicus OX=10116 GN=Slc25a46 PE=1 SV=2	Slc25a46	0.904194	1.60689e-35	184.83	S(0.068)FGS(0.904)GT(0.028)ELGHWVTTPPDIPGSR	3	-0.40173	3	0.911431	0.834151	0.928924	1.20632	1.03754	1.08473	cytoplasm	GO:0016043 cellular component organization; GO:0048285 organelle fission; GO:0044763 single-organism cellular process; GO:0044699 single-organism process; GO:0090148 membrane fission; GO:0044802 single-organism membrane organization; GO:0000266 mitochondrial fission; GO:0051234 establishment of localization; GO:0006810 transport; GO:0006996 organelle organization; GO:0007005 mitochondrion organiz…	GO:0043229 intracellular organelle; GO:0016020 membrane; GO:0019867 outer membrane; GO:0044429 mitochondrial part; GO:0098588 bounding membrane of organelle; GO:0031090 organelle membrane; GO:0005741 mitochondrial outer membrane; GO:0005737 cytoplasm; GO:0044446 intracellular organelle part; GO:0031967 organelle envelope; GO:0031224 intrinsic component of membrane; GO:0044424 intracellular part; …		K03454	SLC25A46; solute carrier family 25, member 46		IPR023395;	Mitochondrial carrier domain;
Q5EB62	32	0.768	Down	0.032525	S	Solute carrier family 25 member 46 OS=Rattus norvegicus OX=10116 GN=Slc25a46 PE=1 SV=2	Slc25a46	0.961507	0.000587526	67.982	S(0.962)FGS(0.834)GT(0.204)ELGHWVTTPPDIPGSR	3	-1.7834	1	0.915551	0.767419	0.92695	1.26211	1.06737	1.06995	cytoplasm	GO:0016043 cellular component organization; GO:0048285 organelle fission; GO:0044763 single-organism cellular process; GO:0044699 single-organism process; GO:0090148 membrane fission; GO:0044802 single-organism membrane organization; GO:0000266 mitochondrial fission; GO:0051234 establishment of localization; GO:0006810 transport; GO:0006996 organelle organization; GO:0007005 mitochondrion organiz…	GO:0043229 intracellular organelle; GO:0016020 membrane; GO:0019867 outer membrane; GO:0044429 mitochondrial part; GO:0098588 bounding membrane of organelle; GO:0031090 organelle membrane; GO:0005741 mitochondrial outer membrane; GO:0005737 cytoplasm; GO:0044446 intracellular organelle part; GO:0031967 organelle envelope; GO:0031224 intrinsic component of membrane; GO:0044424 intracellular part; …		K03454	SLC25A46; solute carrier family 25, member 46		IPR023395;	Mitochondrial carrier domain;
D3ZN76	1230	0.734	Down	0.0140798	S	Protein transport protein sec16 OS=Rattus norvegicus OX=10116 GN=Sec16a PE=1 SV=1	Sec16a	0.999911	5.94991e-12	121.3	AS(1)HYS(1)DQLTPR	3	1.3946	4	0.857843	0.759799	0.932879	1.25	1.15338	1.07041	nucleus	GO:0044085 cellular component biogenesis; GO:0051640 organelle localization; GO:0016043 cellular component organization; GO:0006901 vesicle coating; GO:0046907 intracellular transport; GO:0048207 vesicle targeting, rough ER to cis-Golgi; GO:0048208 COPII vesicle coating; GO:0044699 single-organism process; GO:0048193 Golgi vesicle transport; GO:0006903 vesicle targeting; GO:0051234 establishment …	GO:0043229 intracellular organelle; GO:0016020 membrane; GO:0098588 bounding membrane of organelle; GO:0031090 organelle membrane; GO:0005737 cytoplasm; GO:0044446 intracellular organelle part; GO:0000139 Golgi membrane; GO:0012505 endomembrane system; GO:0044424 intracellular part; GO:0005623 cell; GO:0044422 organelle part; GO:0043226 organelle; GO:0043231 intracellular membrane-bounded organel…		K20353	SEC16; COPII coat assembly protein SEC16		IPR024298; IPR024340;	Ancestral coatomer element 1, Sec16/Sec31; Sec16, central conserved domain;
D3ZN76	1233	0.776	Down	0.0072037	S	Protein transport protein sec16 OS=Rattus norvegicus OX=10116 GN=Sec16a PE=1 SV=1	Sec16a	0.999975	5.94991e-12	168	AS(1)HYS(1)DQLTPR	3	1.3946	9	0.89902	0.809045	0.923152	1.19388	1.12311	1.07551	nucleus	GO:0044085 cellular component biogenesis; GO:0051640 organelle localization; GO:0016043 cellular component organization; GO:0006901 vesicle coating; GO:0046907 intracellular transport; GO:0048207 vesicle targeting, rough ER to cis-Golgi; GO:0048208 COPII vesicle coating; GO:0044699 single-organism process; GO:0048193 Golgi vesicle transport; GO:0006903 vesicle targeting; GO:0051234 establishment …	GO:0043229 intracellular organelle; GO:0016020 membrane; GO:0098588 bounding membrane of organelle; GO:0031090 organelle membrane; GO:0005737 cytoplasm; GO:0044446 intracellular organelle part; GO:0000139 Golgi membrane; GO:0012505 endomembrane system; GO:0044424 intracellular part; GO:0005623 cell; GO:0044422 organelle part; GO:0043226 organelle; GO:0043231 intracellular membrane-bounded organel…		K20353	SEC16; COPII coat assembly protein SEC16		IPR024298; IPR024340;	Ancestral coatomer element 1, Sec16/Sec31; Sec16, central conserved domain;
D3ZN76	1368	0.616	Down	0.0076975	S	Protein transport protein sec16 OS=Rattus norvegicus OX=10116 GN=Sec16a PE=1 SV=1	Sec16a	0.999944	0.00160295	68.107	STHSLPS(1)RR	3	0.4632	1	0.798039	0.639196	0.858949	1.33163	1.24823	1.14694	nucleus	GO:0044085 cellular component biogenesis; GO:0051640 organelle localization; GO:0016043 cellular component organization; GO:0006901 vesicle coating; GO:0046907 intracellular transport; GO:0048207 vesicle targeting, rough ER to cis-Golgi; GO:0048208 COPII vesicle coating; GO:0044699 single-organism process; GO:0048193 Golgi vesicle transport; GO:0006903 vesicle targeting; GO:0051234 establishment …	GO:0043229 intracellular organelle; GO:0016020 membrane; GO:0098588 bounding membrane of organelle; GO:0031090 organelle membrane; GO:0005737 cytoplasm; GO:0044446 intracellular organelle part; GO:0000139 Golgi membrane; GO:0012505 endomembrane system; GO:0044424 intracellular part; GO:0005623 cell; GO:0044422 organelle part; GO:0043226 organelle; GO:0043231 intracellular membrane-bounded organel…		K20353	SEC16; COPII coat assembly protein SEC16		IPR024298; IPR024340;	Ancestral coatomer element 1, Sec16/Sec31; Sec16, central conserved domain;
D3ZN76	1227	0.698	Down	0.020802	S	Protein transport protein sec16 OS=Rattus norvegicus OX=10116 GN=Sec16a PE=1 SV=1	Sec16a	0.841749	5.94991e-12	121.3	YS(0.003)EPERPS(0.155)S(0.842)RAS(0.611)HY(0.483)S(0.9)DQLT(0.007)PR	3	0.65856	3	0.82549	0.697487	0.952335	1.24388	1.21393	1.08878	nucleus	GO:0044085 cellular component biogenesis; GO:0051640 organelle localization; GO:0016043 cellular component organization; GO:0006901 vesicle coating; GO:0046907 intracellular transport; GO:0048207 vesicle targeting, rough ER to cis-Golgi; GO:0048208 COPII vesicle coating; GO:0044699 single-organism process; GO:0048193 Golgi vesicle transport; GO:0006903 vesicle targeting; GO:0051234 establishment …	GO:0043229 intracellular organelle; GO:0016020 membrane; GO:0098588 bounding membrane of organelle; GO:0031090 organelle membrane; GO:0005737 cytoplasm; GO:0044446 intracellular organelle part; GO:0000139 Golgi membrane; GO:0012505 endomembrane system; GO:0044424 intracellular part; GO:0005623 cell; GO:0044422 organelle part; GO:0043226 organelle; GO:0043231 intracellular membrane-bounded organel…		K20353	SEC16; COPII coat assembly protein SEC16		IPR024298; IPR024340;	Ancestral coatomer element 1, Sec16/Sec31; Sec16, central conserved domain;
D3ZJU0	631	0.819	Down	0.020163	S	AT-rich interaction domain 2 OS=Rattus norvegicus OX=10116 GN=Arid2 PE=1 SV=2	Arid2	0.987619	1.39918e-14	131.08	VDAVADVS(0.988)PT(0.012)PSPAGIPHGSQAVGNHFQR	4	-0.35356	1	0.825603	0.946047	0.967339	1.06742	1.14075	1.13786	nucleus	GO:0065008 regulation of biological quality; GO:0001568 blood vessel development; GO:0044699 single-organism process; GO:0008285 negative regulation of cell proliferation; GO:0040013 negative regulation of locomotion; GO:2001141 regulation of RNA biosynthetic process; GO:0007507 heart development; GO:0032879 regulation of localization; GO:0048514 blood vessel morphogenesis; GO:0055017 cardiac mus…	GO:0043229 intracellular organelle; GO:0016020 membrane; GO:0071944 cell periphery; GO:0044446 intracellular organelle part; GO:0032991 macromolecular complex; GO:0031981 nuclear lumen; GO:0044424 intracellular part; GO:0070603 SWI/SNF superfamily-type complex; GO:0005623 cell; GO:0044422 organelle part; GO:0005886 plasma membrane; GO:0043226 organelle; GO:0043231 intracellular membrane-bounded o…	GO:0097159 organic cyclic compound binding; GO:1901363 heterocyclic compound binding; GO:0003677 DNA binding; GO:0005488 binding; GO:0043167 ion binding; GO:0003676 nucleic acid binding; GO:0043169 cation binding; GO:0046872 metal ion binding;	K11765	ARID2; AT-rich interactive domain-containing protein 2	rno05225 Hepatocellular carcinoma - Rattus norvegicus (rat);	IPR011991; IPR003150; IPR016024; IPR007087; IPR001606;	Winged helix-turn-helix DNA-binding domain; DNA-binding RFX-type winged-helix domain; Armadillo-type fold; Zinc finger, C2H2; ARID DNA-binding domain;
A0A0G2JVD6	2318	1.363	Up	0.0093407	S	Lysine methyltransferase 2D OS=Rattus norvegicus OX=10116 GN=Kmt2d PE=1 SV=1	Kmt2d	1	4.26088e-35	180.88	AQEPPPAQALAPS(1)PPNHPDIFR	4	-0.35042	4	1.06306	1.2998	1.13448	0.80981	0.887437	0.868635	nucleus	GO:0050794 regulation of cellular process; GO:0042127 regulation of cell proliferation; GO:0060255 regulation of macromolecule metabolic process; GO:0043627 response to estrogen; GO:0019219 regulation of nucleobase-containing compound metabolic process; GO:0023051 regulation of signaling; GO:0009891 positive regulation of biosynthetic process; GO:0050896 response to stimulus; GO:0033148 positive …	GO:0043229 intracellular organelle; GO:0044446 intracellular organelle part; GO:0032991 macromolecular complex; GO:0031981 nuclear lumen; GO:0035097 histone methyltransferase complex; GO:0044424 intracellular part; GO:1990234 transferase complex; GO:0005623 cell; GO:0044422 organelle part; GO:0034708 methyltransferase complex; GO:0043231 intracellular membrane-bounded organelle; GO:0043226 organe…	GO:0097159 organic cyclic compound binding; GO:0000975 regulatory region DNA binding; GO:1901363 heterocyclic compound binding; GO:0003677 DNA binding; GO:0001067 regulatory region nucleic acid binding; GO:0046914 transition metal ion binding; GO:0044212 transcription regulatory region DNA binding; GO:0005488 binding; GO:0043167 ion binding; GO:0003676 nucleic acid binding; GO:0046872 metal ion b…	K09187	MLL2, ALR; histone-lysine N-methyltransferase MLL2 [EC:2.1.1.43]	rno00310 Lysine degradation - Rattus norvegicus (rat); rno04934 Cushing syndrome - Rattus norvegicus (rat);	IPR001214; IPR001841; IPR001965; IPR003889; IPR003888; IPR009071; IPR000644; IPR013083; IPR011011; IPR019787;	SET domain; Zinc finger, RING-type; Zinc finger, PHD-type; FY-rich, C-terminal; FY-rich, N-terminal; High mobility group box domain; CBS domain; Zinc finger, RING/FYVE/PHD-type; Zinc finger, FYVE/PHD-type; Zinc finger, PHD-finger;
A0A0G2JVD6	1107	1.204	Up	0.011723	S	Lysine methyltransferase 2D OS=Rattus norvegicus OX=10116 GN=Kmt2d PE=1 SV=1	Kmt2d	0.999967	0.000642673	61.612	GS(1)PVLLDPEELIPVTPMEVYGPECK	4	2.4002	1	1.15516	1.11368	1.04752	0.974975	0.900502	0.879837	nucleus	GO:0050794 regulation of cellular process; GO:0042127 regulation of cell proliferation; GO:0060255 regulation of macromolecule metabolic process; GO:0043627 response to estrogen; GO:0019219 regulation of nucleobase-containing compound metabolic process; GO:0023051 regulation of signaling; GO:0009891 positive regulation of biosynthetic process; GO:0050896 response to stimulus; GO:0033148 positive …	GO:0043229 intracellular organelle; GO:0044446 intracellular organelle part; GO:0032991 macromolecular complex; GO:0031981 nuclear lumen; GO:0035097 histone methyltransferase complex; GO:0044424 intracellular part; GO:1990234 transferase complex; GO:0005623 cell; GO:0044422 organelle part; GO:0034708 methyltransferase complex; GO:0043231 intracellular membrane-bounded organelle; GO:0043226 organe…	GO:0097159 organic cyclic compound binding; GO:0000975 regulatory region DNA binding; GO:1901363 heterocyclic compound binding; GO:0003677 DNA binding; GO:0001067 regulatory region nucleic acid binding; GO:0046914 transition metal ion binding; GO:0044212 transcription regulatory region DNA binding; GO:0005488 binding; GO:0043167 ion binding; GO:0003676 nucleic acid binding; GO:0046872 metal ion b…	K09187	MLL2, ALR; histone-lysine N-methyltransferase MLL2 [EC:2.1.1.43]	rno00310 Lysine degradation - Rattus norvegicus (rat); rno04934 Cushing syndrome - Rattus norvegicus (rat);	IPR001214; IPR001841; IPR001965; IPR003889; IPR003888; IPR009071; IPR000644; IPR013083; IPR011011; IPR019787;	SET domain; Zinc finger, RING-type; Zinc finger, PHD-type; FY-rich, C-terminal; FY-rich, N-terminal; High mobility group box domain; CBS domain; Zinc finger, RING/FYVE/PHD-type; Zinc finger, FYVE/PHD-type; Zinc finger, PHD-finger;
A0A0G2K064	557	0.738	Down	0.027282	S	Tyrosine-protein phosphatase non-receptor type OS=Rattus norvegicus OX=10116 GN=Ptpn6 PE=1 SV=1	Ptpn6	0.946498	9.32455e-18	166.49	T(0.012)S(0.042)S(0.946)KHKEEVYENVHSK	3	0.67191	2	0.811609	0.762349	0.990291	1.14242	1.25554	1.07684	cytoplasm	GO:0035335 peptidyl-tyrosine dephosphorylation; GO:0044267 cellular protein metabolic process; GO:0044238 primary metabolic process; GO:0006470 protein dephosphorylation; GO:0016311 dephosphorylation; GO:0044237 cellular metabolic process; GO:0006796 phosphate-containing compound metabolic process; GO:0071704 organic substance metabolic process; GO:0008152 metabolic process; GO:0006793 phosphorus…	GO:0044424 intracellular part; GO:0005623 cell; GO:0044464 cell part; GO:0005622 intracellular; GO:0005737 cytoplasm;	GO:0016787 hydrolase activity; GO:0004721 phosphoprotein phosphatase activity; GO:0004725 protein tyrosine phosphatase activity; GO:0003824 catalytic activity; GO:0042578 phosphoric ester hydrolase activity; GO:0016791 phosphatase activity; GO:0016788 hydrolase activity, acting on ester bonds;	K05697	PTPN6, SHP-1; tyrosine-protein phosphatase non-receptor type 6 [EC:3.1.3.48]	rno04520 Adherens junction - Rattus norvegicus (rat); rno04630 JAK-STAT signaling pathway - Rattus norvegicus (rat); rno04650 Natural killer cell mediated cytotoxicity - Rattus norvegicus (rat); rno04660 T cell receptor signaling pathway - Rattus norvegicus (rat); rno04662 B cell receptor signaling pathway - Rattus norvegicus (rat); rno05140 Leishmaniasis - Rattus norvegicus (rat); rno05205 Prote…	IPR029021; IPR000387; IPR000980; IPR003595; IPR000242;	Protein-tyrosine phosphatase-like; Tyrosine specific protein phosphatases domain; SH2 domain; Protein-tyrosine phosphatase, catalytic; PTP type protein phosphatase;
Q9WU74	473	1.306	Up	0.040043	S	Lipolysis-stimulated lipoprotein receptor OS=Rattus norvegicus OX=10116 GN=Lsr PE=1 SV=1	Lsr	0.999975	0.000566087	91.355	S(1)RDDLYDPDDPR	2	-1.3212	2	1.15486	1.15377	1.12633	0.784047	0.907389	0.938247	plasma membrane	GO:0044085 cellular component biogenesis; GO:0016043 cellular component organization; GO:0034329 cell junction assembly; GO:0044707 single-multicellular organism process; GO:0048732 gland development; GO:0048869 cellular developmental process; GO:0045216 cell-cell junction organization; GO:0044699 single-organism process; GO:0019216 regulation of lipid metabolic process; GO:0048468 cell developme…	GO:0016020 membrane; GO:0044421 extracellular region part; GO:0005615 extracellular space; GO:0030054 cell junction; GO:0071944 cell periphery; GO:0034362 low-density lipoprotein particle; GO:0031982 vesicle; GO:0034358 plasma lipoprotein particle; GO:0034385 triglyceride-rich plasma lipoprotein particle; GO:0031224 intrinsic component of membrane; GO:0032991 macromolecular complex; GO:0042627 ch…	GO:0031406 carboxylic acid binding; GO:0017129 triglyceride binding; GO:0005488 binding; GO:0043167 ion binding; GO:0008289 lipid binding; GO:0043177 organic acid binding; GO:0043168 anion binding; GO:0005515 protein binding; GO:0033293 monocarboxylic acid binding; GO:0005504 fatty acid binding; GO:0036094 small molecule binding;				IPR007110; IPR013783; IPR003599; IPR008664;	Immunoglobulin-like domain; Immunoglobulin-like fold; Immunoglobulin subtype; LISCH7;
G3V6G6	274	0.642	Down	0.0078354	S	Synaptotagmin-like 4, isoform CRA_a OS=Rattus norvegicus OX=10116 GN=Sytl4 PE=1 SV=1	Sytl4	1	1.30465e-30	186.24	S(1)VIDLRPEDVAQESGILGDR	2	0.61141	2	0.715886	0.74555	0.864301	1.33588	1.23024	1.05637	nucleus	GO:0060627 regulation of vesicle-mediated transport; GO:0065008 regulation of biological quality; GO:0050796 regulation of insulin secretion; GO:0023051 regulation of signaling; GO:0044699 single-organism process; GO:0051046 regulation of secretion; GO:0015031 protein transport; GO:0051234 establishment of localization; GO:0010646 regulation of cell communication; GO:0051649 establishment of loca…	GO:0016020 membrane; GO:0031410 cytoplasmic vesicle; GO:0019898 extrinsic component of membrane; GO:0031982 vesicle; GO:0005737 cytoplasm; GO:0044424 intracellular part; GO:0005623 cell; GO:0044422 organelle part; GO:0043228 non-membrane-bounded organelle; GO:0005856 cytoskeleton; GO:0031974 membrane-enclosed lumen; GO:0005815 microtubule organizing center; GO:0005654 nucleoplasm; GO:0070013 intr…	GO:0031267 small GTPase binding; GO:0042043 neurexin family protein binding; GO:0017016 Ras GTPase binding; GO:0005102 receptor binding; GO:0005488 binding; GO:0005543 phospholipid binding; GO:0043167 ion binding; GO:0008289 lipid binding; GO:0043168 anion binding; GO:0005515 protein binding; GO:0051020 GTPase binding; GO:0017137 Rab GTPase binding; GO:0019899 enzyme binding;	K17598	SYTL; synaptotagmin-like protein		IPR013083; IPR011011; IPR010911; IPR000008;	Zinc finger, RING/FYVE/PHD-type; Zinc finger, FYVE/PHD-type; Rab-binding domain; C2 domain;
G3V6G6	296	0.707	Down	0.0021231	S	Synaptotagmin-like 4, isoform CRA_a OS=Rattus norvegicus OX=10116 GN=Sytl4 PE=1 SV=1	Sytl4	0.961271	1.4413e-155	336.87	S(0.038)KS(0.961)VPGLSVDMEEEEEEEEDIDHLVK	3	-0.24728	3	0.799389	0.796859	0.868476	1.15076	1.24878	1.08746	nucleus	GO:0060627 regulation of vesicle-mediated transport; GO:0065008 regulation of biological quality; GO:0050796 regulation of insulin secretion; GO:0023051 regulation of signaling; GO:0044699 single-organism process; GO:0051046 regulation of secretion; GO:0015031 protein transport; GO:0051234 establishment of localization; GO:0010646 regulation of cell communication; GO:0051649 establishment of loca…	GO:0016020 membrane; GO:0031410 cytoplasmic vesicle; GO:0019898 extrinsic component of membrane; GO:0031982 vesicle; GO:0005737 cytoplasm; GO:0044424 intracellular part; GO:0005623 cell; GO:0044422 organelle part; GO:0043228 non-membrane-bounded organelle; GO:0005856 cytoskeleton; GO:0031974 membrane-enclosed lumen; GO:0005815 microtubule organizing center; GO:0005654 nucleoplasm; GO:0070013 intr…	GO:0031267 small GTPase binding; GO:0042043 neurexin family protein binding; GO:0017016 Ras GTPase binding; GO:0005102 receptor binding; GO:0005488 binding; GO:0005543 phospholipid binding; GO:0043167 ion binding; GO:0008289 lipid binding; GO:0043168 anion binding; GO:0005515 protein binding; GO:0051020 GTPase binding; GO:0017137 Rab GTPase binding; GO:0019899 enzyme binding;	K17598	SYTL; synaptotagmin-like protein		IPR013083; IPR011011; IPR010911; IPR000008;	Zinc finger, RING/FYVE/PHD-type; Zinc finger, FYVE/PHD-type; Rab-binding domain; C2 domain;
D4A3E1	54	1.207	Up	0.040379	S	Heterogeneous nuclear ribonucleoprotein L-like OS=Rattus norvegicus OX=10116 GN=Hnrnpll PE=1 SV=1	Hnrnpll	0.998285	1.11206e-47	225.83	QEATPQAGS(1)DS(0.998)DS(0.002)GGGDR	2	0.14728	2	1.23037	1.03858	1.04893	0.889764	0.970499	0.889328	cytoplasm	GO:0033120 positive regulation of RNA splicing; GO:0050794 regulation of cellular process; GO:0006725 cellular aromatic compound metabolic process; GO:0060255 regulation of macromolecule metabolic process; GO:0019219 regulation of nucleobase-containing compound metabolic process; GO:0044237 cellular metabolic process; GO:0071704 organic substance metabolic process; GO:0008152 metabolic process; G…	GO:0043226 organelle; GO:0043231 intracellular membrane-bounded organelle; GO:0043229 intracellular organelle; GO:0016020 membrane; GO:0005634 nucleus; GO:0044464 cell part; GO:0005622 intracellular; GO:0044424 intracellular part; GO:0043227 membrane-bounded organelle; GO:0005623 cell;	GO:0097159 organic cyclic compound binding; GO:1901363 heterocyclic compound binding; GO:0003729 mRNA binding; GO:0003723 RNA binding; GO:1901265 nucleoside phosphate binding; GO:0005488 binding; GO:0003676 nucleic acid binding; GO:0000166 nucleotide binding; GO:0036094 small molecule binding;	K13159	HNRNPL; heterogeneous nuclear ribonucleoprotein L		IPR000504; IPR012677;	RNA recognition motif domain; Nucleotide-binding alpha-beta plait domain;
M0R9Q1	604	0.369	Down	0.0079955	S	RCG48334, isoform CRA_e OS=Rattus norvegicus OX=10116 GN=Rbm14 PE=1 SV=1	Rbm14	0.999992	0.00564511	66.692	RYGS(1)DRR	3	0.22815	1	0.383317	0.4666	0.751724	1.38014	1.64429	1.32154	nucleus	GO:0044085 cellular component biogenesis; GO:0044700 single organism signaling; GO:0007166 cell surface receptor signaling pathway; GO:0051129 negative regulation of cellular component organization; GO:0009891 positive regulation of biosynthetic process; GO:0044699 single-organism process; GO:1902116 negative regulation of organelle assembly; GO:0044237 cellular metabolic process; GO:0010564 regu…	GO:0043229 intracellular organelle; GO:0005737 cytoplasm; GO:0044446 intracellular organelle part; GO:0032991 macromolecular complex; GO:0031981 nuclear lumen; GO:0044424 intracellular part; GO:0005667 transcription factor complex; GO:0016604 nuclear body; GO:0005623 cell; GO:0044422 organelle part; GO:0043231 intracellular membrane-bounded organelle; GO:0043226 organelle; GO:0031974 membrane-enc…	GO:0097159 organic cyclic compound binding; GO:1901363 heterocyclic compound binding; GO:0003723 RNA binding; GO:1901265 nucleoside phosphate binding; GO:0030374 ligand-dependent nuclear receptor transcription coactivator activity; GO:0005488 binding; GO:0003676 nucleic acid binding; GO:0000989 transcription factor activity, transcription factor binding; GO:0003713 transcription coactivator activ…	K13189	RBM14; RNA-binding protein 14		IPR000504; IPR012677;	RNA recognition motif domain; Nucleotide-binding alpha-beta plait domain;
M0R9Q1	520	0.679	Down	0.009399	S	RCG48334, isoform CRA_e OS=Rattus norvegicus OX=10116 GN=Rbm14 PE=1 SV=1	Rbm14	0.832694	5.7389e-113	305.37	T(0.084)QS(0.833)S(0.084)ASLAASYAAQQHPQAAASYR	3	1.0306	1	0.842105	0.6999	0.883744	1.28786	1.17635	1.1092	nucleus	GO:0044085 cellular component biogenesis; GO:0044700 single organism signaling; GO:0007166 cell surface receptor signaling pathway; GO:0051129 negative regulation of cellular component organization; GO:0009891 positive regulation of biosynthetic process; GO:0044699 single-organism process; GO:1902116 negative regulation of organelle assembly; GO:0044237 cellular metabolic process; GO:0010564 regu…	GO:0043229 intracellular organelle; GO:0005737 cytoplasm; GO:0044446 intracellular organelle part; GO:0032991 macromolecular complex; GO:0031981 nuclear lumen; GO:0044424 intracellular part; GO:0005667 transcription factor complex; GO:0016604 nuclear body; GO:0005623 cell; GO:0044422 organelle part; GO:0043231 intracellular membrane-bounded organelle; GO:0043226 organelle; GO:0031974 membrane-enc…	GO:0097159 organic cyclic compound binding; GO:1901363 heterocyclic compound binding; GO:0003723 RNA binding; GO:1901265 nucleoside phosphate binding; GO:0030374 ligand-dependent nuclear receptor transcription coactivator activity; GO:0005488 binding; GO:0003676 nucleic acid binding; GO:0000989 transcription factor activity, transcription factor binding; GO:0003713 transcription coactivator activ…	K13189	RBM14; RNA-binding protein 14		IPR000504; IPR012677;	RNA recognition motif domain; Nucleotide-binding alpha-beta plait domain;
M0R9Q1	215	1.63	Up	0.0111592	S	RCG48334, isoform CRA_e OS=Rattus norvegicus OX=10116 GN=Rbm14 PE=1 SV=1	Rbm14	1	0.0199595	64.103	DRS(1)PLRR	2	-0.2751	3	1.29196	1.05484	1.39704	0.67001	0.852705	0.773509	nucleus	GO:0044085 cellular component biogenesis; GO:0044700 single organism signaling; GO:0007166 cell surface receptor signaling pathway; GO:0051129 negative regulation of cellular component organization; GO:0009891 positive regulation of biosynthetic process; GO:0044699 single-organism process; GO:1902116 negative regulation of organelle assembly; GO:0044237 cellular metabolic process; GO:0010564 regu…	GO:0043229 intracellular organelle; GO:0005737 cytoplasm; GO:0044446 intracellular organelle part; GO:0032991 macromolecular complex; GO:0031981 nuclear lumen; GO:0044424 intracellular part; GO:0005667 transcription factor complex; GO:0016604 nuclear body; GO:0005623 cell; GO:0044422 organelle part; GO:0043231 intracellular membrane-bounded organelle; GO:0043226 organelle; GO:0031974 membrane-enc…	GO:0097159 organic cyclic compound binding; GO:1901363 heterocyclic compound binding; GO:0003723 RNA binding; GO:1901265 nucleoside phosphate binding; GO:0030374 ligand-dependent nuclear receptor transcription coactivator activity; GO:0005488 binding; GO:0003676 nucleic acid binding; GO:0000989 transcription factor activity, transcription factor binding; GO:0003713 transcription coactivator activ…	K13189	RBM14; RNA-binding protein 14		IPR000504; IPR012677;	RNA recognition motif domain; Nucleotide-binding alpha-beta plait domain;
M0R9Q1	256	0.678	Down	0.0122569	S	RCG48334, isoform CRA_e OS=Rattus norvegicus OX=10116 GN=Rbm14 PE=1 SV=1	Rbm14	0.982252	3.80512e-06	112.67	AQPS(0.018)AS(0.982)LGVGYR	2	0.092716	1	0.862959	0.79661	0.761576	1.28987	1.27355	1.00708	nucleus	GO:0044085 cellular component biogenesis; GO:0044700 single organism signaling; GO:0007166 cell surface receptor signaling pathway; GO:0051129 negative regulation of cellular component organization; GO:0009891 positive regulation of biosynthetic process; GO:0044699 single-organism process; GO:1902116 negative regulation of organelle assembly; GO:0044237 cellular metabolic process; GO:0010564 regu…	GO:0043229 intracellular organelle; GO:0005737 cytoplasm; GO:0044446 intracellular organelle part; GO:0032991 macromolecular complex; GO:0031981 nuclear lumen; GO:0044424 intracellular part; GO:0005667 transcription factor complex; GO:0016604 nuclear body; GO:0005623 cell; GO:0044422 organelle part; GO:0043231 intracellular membrane-bounded organelle; GO:0043226 organelle; GO:0031974 membrane-enc…	GO:0097159 organic cyclic compound binding; GO:1901363 heterocyclic compound binding; GO:0003723 RNA binding; GO:1901265 nucleoside phosphate binding; GO:0030374 ligand-dependent nuclear receptor transcription coactivator activity; GO:0005488 binding; GO:0003676 nucleic acid binding; GO:0000989 transcription factor activity, transcription factor binding; GO:0003713 transcription coactivator activ…	K13189	RBM14; RNA-binding protein 14		IPR000504; IPR012677;	RNA recognition motif domain; Nucleotide-binding alpha-beta plait domain;
F1MAQ8	559	1.279	Up	0.045076	S	PNN-interacting serine and arginine-rich protein OS=Rattus norvegicus OX=10116 GN=Pnisr PE=1 SV=2	Pnisr	0.999932	0.00584758	55.975	HS(1)RS(0.99)RS(0.603)PT(0.407)VK	3	1.4982	1	1.01014	1.29757	1.0715	0.927646	0.819792	0.894118	nucleus		GO:0043229 intracellular organelle; GO:0044446 intracellular organelle part; GO:0005737 cytoplasm; GO:0031981 nuclear lumen; GO:0044424 intracellular part; GO:0016604 nuclear body; GO:0005829 cytosol; GO:0005623 cell; GO:0044422 organelle part; GO:0031974 membrane-enclosed lumen; GO:0043226 organelle; GO:0043231 intracellular membrane-bounded organelle; GO:0005654 nucleoplasm; GO:0005634 nucleus;…	GO:0097159 organic cyclic compound binding; GO:1901363 heterocyclic compound binding; GO:0003723 RNA binding; GO:0005488 binding; GO:0003676 nucleic acid binding;	K13170	SFRS18; splicing factor, arginine/serine-rich 18
F1MAQ8	561	1.279	Up	0.045076	S	PNN-interacting serine and arginine-rich protein OS=Rattus norvegicus OX=10116 GN=Pnisr PE=1 SV=2	Pnisr	0.990295	0.00584758	55.975	HS(1)RS(0.99)RS(0.603)PT(0.407)VK	3	1.4982	1	1.01014	1.29757	1.0715	0.927646	0.819792	0.894118	nucleus		GO:0043229 intracellular organelle; GO:0044446 intracellular organelle part; GO:0005737 cytoplasm; GO:0031981 nuclear lumen; GO:0044424 intracellular part; GO:0016604 nuclear body; GO:0005829 cytosol; GO:0005623 cell; GO:0044422 organelle part; GO:0031974 membrane-enclosed lumen; GO:0043226 organelle; GO:0043231 intracellular membrane-bounded organelle; GO:0005654 nucleoplasm; GO:0005634 nucleus;…	GO:0097159 organic cyclic compound binding; GO:1901363 heterocyclic compound binding; GO:0003723 RNA binding; GO:0005488 binding; GO:0003676 nucleic acid binding;	K13170	SFRS18; splicing factor, arginine/serine-rich 18
Q9WTY2	332	0.816	Down	0.025322	S	GTP-binding protein REM 2 OS=Rattus norvegicus OX=10116 GN=Rem2 PE=1 SV=2	Rem2	0.995227	0.000314589	86.803	S(0.995)RS(0.996)CHDLS(0.009)VL	3	-0.12661	3	0.966169	0.802165	0.944069	1.09359	1.1004	1.13133	nucleus	GO:0050794 regulation of cellular process; GO:0044700 single organism signaling; GO:0051716 cellular response to stimulus; GO:0007165 signal transduction; GO:0050789 regulation of biological process; GO:0007154 cell communication; GO:0035556 intracellular signal transduction; GO:0044699 single-organism process; GO:0007264 small GTPase mediated signal transduction; GO:0023052 signaling; GO:0050896…	GO:0016020 membrane; GO:0005623 cell; GO:0071944 cell periphery; GO:0005622 intracellular; GO:0044464 cell part; GO:0005886 plasma membrane;	GO:1901265 nucleoside phosphate binding; GO:0001882 nucleoside binding; GO:0043167 ion binding; GO:0016817 hydrolase activity, acting on acid anhydrides; GO:0016787 hydrolase activity; GO:0000166 nucleotide binding; GO:0017111 nucleoside-triphosphatase activity; GO:1901363 heterocyclic compound binding; GO:0097159 organic cyclic compound binding; GO:0032549 ribonucleoside binding; GO:0097367 carb…	K07848	REM2; Rad and Gem related GTP binding protein 2		IPR027417;	P-loop containing nucleoside triphosphate hydrolase;
F1M031	675	0.638	Down	0.0113434	S	Neuron navigator 1 OS=Rattus norvegicus OX=10116 GN=Nav1 PE=1 SV=2	Nav1	1	0.00164484	89.355	S(1)LPRPAK	3	0.13824	2	0.797392	0.674877	0.876805	1.107	1.388	1.18776	nucleus				K16776	NAV1; neuron navigator 1		IPR003593; IPR027417;	AAA+ ATPase domain; P-loop containing nucleoside triphosphate hydrolase;
F1M031	455	0.727	Down	0.00095941	S	Neuron navigator 1 OS=Rattus norvegicus OX=10116 GN=Nav1 PE=1 SV=2	Nav1	0.853503	0.000360399	111.63	RS(0.144)S(0.854)T(0.002)IVLR	3	-0.21707	2	0.893681	0.818719	0.830606	1.1286	1.147	1.22363	nucleus				K16776	NAV1; neuron navigator 1		IPR003593; IPR027417;	AAA+ ATPase domain; P-loop containing nucleoside triphosphate hydrolase;
F1M031	315	0.749	Down	0.00087754	S	Neuron navigator 1 OS=Rattus norvegicus OX=10116 GN=Nav1 PE=1 SV=2	Nav1	0.836221	0.00130115	96.624	S(0.164)S(0.836)PLSWR	2	-1.1277	1	0.893681	0.841379	0.852743	1.17181	1.191	1.09177	nucleus				K16776	NAV1; neuron navigator 1		IPR003593; IPR027417;	AAA+ ATPase domain; P-loop containing nucleoside triphosphate hydrolase;
F1M031	93	0.712	Down	0.008636	S	Neuron navigator 1 OS=Rattus norvegicus OX=10116 GN=Nav1 PE=1 SV=2	Nav1	0.996919	4.267e-10	148.06	S(0.997)LT(0.003)NLSFLTDSEK	2	0.9443	2	0.791374	0.770443	0.949952	1.18107	1.231	1.11709	nucleus				K16776	NAV1; neuron navigator 1		IPR003593; IPR027417;	AAA+ ATPase domain; P-loop containing nucleoside triphosphate hydrolase;
F1M031	493	0.648	Down	0.0035402	S	Neuron navigator 1 OS=Rattus norvegicus OX=10116 GN=Nav1 PE=1 SV=2	Nav1	0.995674	0.000280275	85.909	KLEYDS(0.004)GS(0.996)LK	3	-0.15384	1	0.830492	0.699507	0.846968	1.25617	1.278	1.13608	nucleus				K16776	NAV1; neuron navigator 1		IPR003593; IPR027417;	AAA+ ATPase domain; P-loop containing nucleoside triphosphate hydrolase;
D3ZBC7	369	1.239	Up	0.00129832	T	Dehydrogenase/reductase 13 OS=Rattus norvegicus OX=10116 GN=Dhrs13 PE=1 SV=3	Dhrs13	1	0.00279284	82.417	IHVKDEPT(1)P	3	-0.32936	1	1.07588	1.13433	1.12887	0.930029	0.865714	0.898204	extracellular		GO:0016020 membrane;		K11169	DHRS13; dehydrogenase/reductase SDR family member 13 [EC:1.1.-.-]		IPR016040;	NAD(P)-binding domain;
A0A0G2JXD9	718	0.815	Down	0.044816	S	DOP1 leucine zipper-like protein B OS=Rattus norvegicus OX=10116 GN=Dop1b PE=1 SV=1	Dop1b	0.830152	3.67299e-06	97.081	S(0.003)S(0.003)ES(0.036)LS(0.206)S(0.752)APS(0.17)S(0.83)PHRK	3	-0.40349	6	0.897384	0.812053	1	1.17913	1.11361	1.03109	plasma membrane	GO:0046907 intracellular transport; GO:0006895 Golgi to endosome transport; GO:0003008 system process; GO:0016192 vesicle-mediated transport; GO:0048193 Golgi vesicle transport; GO:0032501 multicellular organismal process; GO:0050877 neurological system process; GO:0051234 establishment of localization; GO:0051641 cellular localization; GO:0016197 endosomal transport; GO:0006810 transport; GO:005…	GO:0097708 intracellular vesicle; GO:0043229 intracellular organelle; GO:0044421 extracellular region part; GO:0031410 cytoplasmic vesicle; GO:0044446 intracellular organelle part; GO:0005737 cytoplasm; GO:0031982 vesicle; GO:0012505 endomembrane system; GO:0044424 intracellular part; GO:0005829 cytosol; GO:0005623 cell; GO:0005576 extracellular region; GO:0044422 organelle part; GO:0043231 intra…					IPR007249;	Dopey, N-terminal;
A0A0G2JXD9	714	0.782	Down	0.042222	S	DOP1 leucine zipper-like protein B OS=Rattus norvegicus OX=10116 GN=Dop1b PE=1 SV=1	Dop1b	0.882392	3.5415e-15	154.7	T(0.204)RS(0.502)S(0.32)ES(0.458)LS(0.639)S(0.882)APS(0.389)S(0.605)PHRK	3	1.3677	4	0.850101	0.777324	1.01776	1.19291	1.12439	1.0672	plasma membrane	GO:0046907 intracellular transport; GO:0006895 Golgi to endosome transport; GO:0003008 system process; GO:0016192 vesicle-mediated transport; GO:0048193 Golgi vesicle transport; GO:0032501 multicellular organismal process; GO:0050877 neurological system process; GO:0051234 establishment of localization; GO:0051641 cellular localization; GO:0016197 endosomal transport; GO:0006810 transport; GO:005…	GO:0097708 intracellular vesicle; GO:0043229 intracellular organelle; GO:0044421 extracellular region part; GO:0031410 cytoplasmic vesicle; GO:0044446 intracellular organelle part; GO:0005737 cytoplasm; GO:0031982 vesicle; GO:0012505 endomembrane system; GO:0044424 intracellular part; GO:0005829 cytosol; GO:0005623 cell; GO:0005576 extracellular region; GO:0044422 organelle part; GO:0043231 intra…					IPR007249;	Dopey, N-terminal;
G3V6R4	480	0.471	Down	0.0099362	T	Leucine-rich repeat-containing 1 OS=Rattus norvegicus OX=10116 GN=Lrrc1 PE=4 SV=1	Lrrc1	1	0.000386865	84.753	RAT(1)PHPGELK	4	0.14436	1	0.654106	0.581485	0.702415	1.7381	1.33715	1.03704	cytoplasm	GO:0050794 regulation of cellular process; GO:0044700 single organism signaling; GO:0051716 cellular response to stimulus; GO:0007165 signal transduction; GO:0050789 regulation of biological process; GO:0007154 cell communication; GO:0044699 single-organism process; GO:0023052 signaling; GO:0050896 response to stimulus; GO:0009987 cellular process; GO:0065007 biological regulation;	GO:0016020 membrane; GO:0071944 cell periphery; GO:0044464 cell part; GO:0005622 intracellular; GO:0005737 cytoplasm; GO:0044424 intracellular part; GO:0005829 cytosol; GO:0005623 cell; GO:0005886 plasma membrane; GO:0044444 cytoplasmic part;	GO:0005515 protein binding; GO:0005488 binding;				IPR032675;	Leucine-rich repeat domain, L domain-like;
F1M0A6	564	0.728	Down	0.025739	S	Tyrosine-protein kinase OS=Rattus norvegicus OX=10116 GN=LOC100909750 PE=3 SV=1	LOC100909750	1	1.45005e-45	209.3	GLGESDALDSEPAVS(1)PLLPR	3	0.4446	2	0.790743	0.786822	0.951295	1.06237	1.31606	1.09538	nucleus	GO:0044085 cellular component biogenesis; GO:0065008 regulation of biological quality; GO:0010941 regulation of cell death; GO:0043523 regulation of neuron apoptotic process; GO:0018212 peptidyl-tyrosine modification; GO:0044237 cellular metabolic process; GO:0050877 neurological system process; GO:0030041 actin filament polymerization; GO:0007610 behavior; GO:0048145 regulation of fibroblast pro…	GO:0031252 cell leading edge; GO:0043229 intracellular organelle; GO:0042995 cell projection; GO:0005783 endoplasmic reticulum; GO:0005737 cytoplasm; GO:0043025 neuronal cell body; GO:0012505 endomembrane system; GO:0030426 growth cone; GO:0044424 intracellular part; GO:0044463 cell projection part; GO:0030427 site of polarized growth; GO:0005623 cell; GO:0005739 mitochondrion; GO:0045202 synapse…	GO:1901265 nucleoside phosphate binding; GO:0016773 phosphotransferase activity, alcohol group as acceptor; GO:0019901 protein kinase binding; GO:0004713 protein tyrosine kinase activity; GO:0005515 protein binding; GO:0004672 protein kinase activity; GO:1901363 heterocyclic compound binding; GO:0097159 organic cyclic compound binding; GO:0016301 kinase activity; GO:0032553 ribonucleotide binding…	K06619	ABL1; abelson tyrosine-protein kinase 1 [EC:2.7.10.2]	rno04012 ErbB signaling pathway - Rattus norvegicus (rat); rno04014 Ras signaling pathway - Rattus norvegicus (rat); rno04110 Cell cycle - Rattus norvegicus (rat); rno04360 Axon guidance - Rattus norvegicus (rat); rno04722 Neurotrophin signaling pathway - Rattus norvegicus (rat); rno05200 Pathways in cancer - Rattus norvegicus (rat); rno05206 MicroRNAs in cancer - Rattus norvegicus (rat); rno0522…	IPR015015; IPR000980; IPR001452; IPR000719; IPR001245; IPR020635; IPR011009;	F-actin binding; SH2 domain; SH3 domain; Protein kinase domain; Serine-threonine/tyrosine-protein kinase catalytic domain; Tyrosine-protein kinase, catalytic domain; Protein kinase-like domain;
Q6AXS9	6	0.603	Down	0.032182	S	Refilin-B OS=Rattus norvegicus OX=10116 GN=Rflnb PE=2 SV=1	Rflnb	1	8.6122e-11	150.69	VGRLS(1)LQDVPELVDTK	3	-0.37351	4	0.759398	0.669608	0.852941	1.60092	1.17322	1.00995	nucleus	GO:0050794 regulation of cellular process; GO:0044707 single-multicellular organism process; GO:0051093 negative regulation of developmental process; GO:0016043 cellular component organization; GO:0048869 cellular developmental process; GO:0007015 actin filament organization; GO:0051241 negative regulation of multicellular organismal process; GO:0044699 single-organism process; GO:0030500 regulat…	GO:0043229 intracellular organelle; GO:0043232 intracellular non-membrane-bounded organelle; GO:0044430 cytoskeletal part; GO:0044446 intracellular organelle part; GO:0005737 cytoplasm; GO:0044424 intracellular part; GO:0005623 cell; GO:0015629 actin cytoskeleton; GO:0044422 organelle part; GO:0032432 actin filament bundle; GO:0043228 non-membrane-bounded organelle; GO:0043226 organelle; GO:00058…	GO:0005515 protein binding; GO:0008092 cytoskeletal protein binding; GO:0031005 filamin binding; GO:0005488 binding;
G3V9G7	37	0.764	Down	0.00159978	S	R3H domain-containing 2 OS=Rattus norvegicus OX=10116 GN=R3hdm2 PE=1 SV=1	R3hdm2	0.92519	4.29861e-11	116.94	T(0.075)PS(0.925)KEEVEKEGEENGLR	3	0.68759	4	0.827425	0.913775	0.877664	1.17131	1.09661	1.16118	cytoplasm,nucleus			GO:0097159 organic cyclic compound binding; GO:1901363 heterocyclic compound binding; GO:0005488 binding; GO:0003676 nucleic acid binding;				IPR024771; IPR001374;	SUZ domain; R3H domain;
G3V9G7	263	0.791	Down	0.007235	S	R3H domain-containing 2 OS=Rattus norvegicus OX=10116 GN=R3hdm2 PE=1 SV=1	R3hdm2	1	0.000229166	79.393	DDAS(1)MDREENQMR	3	1.4027	1	0.905784	0.844374	0.918443	1.04681	1.13258	1.19408	cytoplasm,nucleus			GO:0097159 organic cyclic compound binding; GO:1901363 heterocyclic compound binding; GO:0005488 binding; GO:0003676 nucleic acid binding;				IPR024771; IPR001374;	SUZ domain; R3H domain;
M0R5H1	371	0.793	Down	0.0060005	S	Enhancer trap locus 4 OS=Rattus norvegicus OX=10116 GN=Etl4 PE=1 SV=2	Etl4	0.910288	0.000765839	94.801	LS(0.09)S(0.91)LPVSR	2	0.11699	1	0.892713	0.83871	0.90566	1.17613	1.11272	1.03675	nucleus	GO:0032502 developmental process; GO:0044707 single-multicellular organism process; GO:0048731 system development; GO:0044767 single-organism developmental process; GO:0043009 chordate embryonic development; GO:0009792 embryo development ending in birth or egg hatching; GO:0044699 single-organism process; GO:0007275 multicellular organism development; GO:0009790 embryo development; GO:0048706 emb…						IPR022782;	Actin interacting protein 3, C-terminal;
M0R5H1	59	0.617	Down	0.0155837	T	Enhancer trap locus 4 OS=Rattus norvegicus OX=10116 GN=Etl4 PE=1 SV=2	Etl4	1	0.028676	56.043	RHT(1)LGGPR	3	0.56319	1	0.727733	0.617204	0.915591	1.32779	1.18112	1.15474	nucleus	GO:0032502 developmental process; GO:0044707 single-multicellular organism process; GO:0048731 system development; GO:0044767 single-organism developmental process; GO:0043009 chordate embryonic development; GO:0009792 embryo development ending in birth or egg hatching; GO:0044699 single-organism process; GO:0007275 multicellular organism development; GO:0009790 embryo development; GO:0048706 emb…						IPR022782;	Actin interacting protein 3, C-terminal;
M0R5H1	528	0.699	Down	0.039444	S	Enhancer trap locus 4 OS=Rattus norvegicus OX=10116 GN=Etl4 PE=1 SV=2	Etl4	0.999556	0.00577639	58.172	ASPSRQS(1)FK	3	1.6151	2	0.795547	0.694624	0.955313	1.22505	1.27553	0.997099	nucleus	GO:0032502 developmental process; GO:0044707 single-multicellular organism process; GO:0048731 system development; GO:0044767 single-organism developmental process; GO:0043009 chordate embryonic development; GO:0009792 embryo development ending in birth or egg hatching; GO:0044699 single-organism process; GO:0007275 multicellular organism development; GO:0009790 embryo development; GO:0048706 emb…						IPR022782;	Actin interacting protein 3, C-terminal;
M0R5H1	187	0.712	Down	0.0069959	S	Enhancer trap locus 4 OS=Rattus norvegicus OX=10116 GN=Etl4 PE=1 SV=2	Etl4	0.978987	0.000118412	110.31	T(0.021)RAS(0.979)LPVVR	3	0.22392	2	0.783401	0.82043	0.864945	1.15851	1.15703	1.1528	nucleus	GO:0032502 developmental process; GO:0044707 single-multicellular organism process; GO:0048731 system development; GO:0044767 single-organism developmental process; GO:0043009 chordate embryonic development; GO:0009792 embryo development ending in birth or egg hatching; GO:0044699 single-organism process; GO:0007275 multicellular organism development; GO:0009790 embryo development; GO:0048706 emb…						IPR022782;	Actin interacting protein 3, C-terminal;
Q3KRF2	667	1.235	Up	0.0042633	S	High density lipoprotein binding protein (Vigilin) OS=Rattus norvegicus OX=10116 GN=Hdlbp PE=1 SV=1	Hdlbp	0.999311	0.00194474	63.091	LHNS(0.999)LIGT(0.001)K	3	-0.54631	1	1.06924	1.17778	1.08069	0.924395	0.866034	0.903024	cytoplasm		GO:0044464 cell part; GO:0005622 intracellular; GO:0005737 cytoplasm; GO:0044424 intracellular part; GO:0005829 cytosol; GO:0005623 cell; GO:0044444 cytoplasmic part;	GO:0097159 organic cyclic compound binding; GO:1901363 heterocyclic compound binding; GO:0003723 RNA binding; GO:0005488 binding; GO:0003676 nucleic acid binding;				IPR004087; IPR004088;	K Homology domain; K Homology domain, type 1;
Q3KRF2	944	1.228	Up	0.040359	S	High density lipoprotein binding protein (Vigilin) OS=Rattus norvegicus OX=10116 GN=Hdlbp PE=1 SV=1	Hdlbp	0.99977	0.00118084	88.596	ETDPGS(1)PRR	2	-0.27537	3	1.2087	1.01932	1.09894	0.818548	0.940928	0.948905	cytoplasm		GO:0044464 cell part; GO:0005622 intracellular; GO:0005737 cytoplasm; GO:0044424 intracellular part; GO:0005829 cytosol; GO:0005623 cell; GO:0044444 cytoplasmic part;	GO:0097159 organic cyclic compound binding; GO:1901363 heterocyclic compound binding; GO:0003723 RNA binding; GO:0005488 binding; GO:0003676 nucleic acid binding;				IPR004087; IPR004088;	K Homology domain; K Homology domain, type 1;
A0A0G2QC41	859	0.819	Down	0.0072004	S	Histone deacetylase 6 OS=Rattus norvegicus OX=10116 GN=Hdac6 PE=1 SV=1	Hdac6	0.977201	2.97312e-05	94.532	KLPQS(0.023)AS(0.977)PVSAK	4	0.37727	3	0.915578	0.892023	0.895303	1.18303	1.07938	1.03933	nucleus	GO:0065008 regulation of biological quality; GO:0010941 regulation of cell death; GO:0032270 positive regulation of cellular protein metabolic process; GO:0010821 regulation of mitochondrion organization; GO:0051385 response to mineralocorticoid; GO:0001558 regulation of cell growth; GO:0051240 positive regulation of multicellular organismal process; GO:0032879 regulation of localization; GO:0050…	GO:0043229 intracellular organelle; GO:0042995 cell projection; GO:0043232 intracellular non-membrane-bounded organelle; GO:0044430 cytoskeletal part; GO:0044446 intracellular organelle part; GO:0005737 cytoplasm; GO:0099568 cytoplasmic region; GO:0032838 cell projection cytoplasm; GO:0044424 intracellular part; GO:0044463 cell projection part; GO:0005623 cell; GO:0044422 organelle part; GO:00332…	GO:0046914 transition metal ion binding; GO:0003824 catalytic activity; GO:0005488 binding; GO:0043167 ion binding; GO:0046872 metal ion binding; GO:0043169 cation binding; GO:0005515 protein binding; GO:0016787 hydrolase activity; GO:0008270 zinc ion binding;				IPR001607; IPR013083; IPR023801;	Zinc finger, UBP-type; Zinc finger, RING/FYVE/PHD-type; Histone deacetylase domain;
Q63737	92	0.708	Down	0.049121	S	Phosducin-like protein OS=Rattus norvegicus OX=10116 GN=Pdcl PE=1 SV=1	Pdcl	0.866619	0.0162178	51.762	KLS(0.867)MS(0.133)CR	3	0.054611	1	0.718128	0.770243	0.985522	1.20206	1.3	0.993433	cytoplasm	GO:0044085 cellular component biogenesis; GO:0009116 nucleoside metabolic process; GO:0007601 visual perception; GO:0044699 single-organism process; GO:0009163 nucleoside biosynthetic process; GO:0009058 biosynthetic process; GO:0044237 cellular metabolic process; GO:0050877 neurological system process; GO:0006457 protein folding; GO:0008152 metabolic process; GO:1901137 carbohydrate derivative b…	GO:0044424 intracellular part; GO:0005623 cell; GO:0044464 cell part; GO:0005622 intracellular; GO:0005737 cytoplasm;	GO:0005515 protein binding; GO:0005488 binding; GO:0032403 protein complex binding; GO:0044877 macromolecular complex binding;				IPR023196; IPR024253; IPR012336;	Phosducin N-terminal domain; Phosducin, thioredoxin-like domain; Thioredoxin-like fold;
Q6P796	178	0.759	Down	0.0102178	S	Serine peptidase inhibitor, Kunitz type, 2 OS=Rattus norvegicus OX=10116 GN=Spint2 PE=1 SV=1	Spint2	0.799595	1.32839e-15	152.89	TVWS(0.8)T(0.2)ADDKEQLVK	3	-0.4263	2	0.806763	0.84585	0.925118	1.13951	1.21387	1.04073	plasma membrane	GO:0050794 regulation of cellular process; GO:0010951 negative regulation of endopeptidase activity; GO:0042127 regulation of cell proliferation; GO:0060255 regulation of macromolecule metabolic process; GO:0071310 cellular response to organic substance; GO:0071363 cellular response to growth factor stimulus; GO:0031324 negative regulation of cellular metabolic process; GO:0048523 negative regula…	GO:0016020 membrane; GO:0044464 cell part; GO:0071944 cell periphery; GO:0044425 membrane part; GO:0031224 intrinsic component of membrane; GO:0005623 cell; GO:0016021 integral component of membrane; GO:0005886 plasma membrane;	GO:0004867 serine-type endopeptidase inhibitor activity; GO:0030234 enzyme regulator activity; GO:0030414 peptidase inhibitor activity; GO:0061134 peptidase regulator activity; GO:0061135 endopeptidase regulator activity; GO:0098772 molecular function regulator; GO:0004857 enzyme inhibitor activity; GO:0004866 endopeptidase inhibitor activity;				IPR002223;	Pancreatic trypsin inhibitor Kunitz domain;
D3ZFP4	726	1.221	Up	0.0101834	S	DNA helicase OS=Rattus norvegicus OX=10116 GN=Mcm3 PE=1 SV=3	Mcm3	0.973873	8.54358e-46	214.44	T(0.025)DDS(0.974)QEKT(0.001)DESQETQESQK	4	1.0976	1	1.1939	1.04038	1.07478	0.924226	0.898678	0.887379	nucleus	GO:0016043 cellular component organization; GO:0006260 DNA replication; GO:0006725 cellular aromatic compound metabolic process; GO:0032508 DNA duplex unwinding; GO:0006259 DNA metabolic process; GO:0032392 DNA geometric change; GO:1901360 organic cyclic compound metabolic process; GO:0006807 nitrogen compound metabolic process; GO:0009058 biosynthetic process; GO:0044238 primary metabolic proces…	GO:0016020 membrane; GO:0000784 nuclear chromosome, telomeric region; GO:0000781 chromosome, telomeric region; GO:0005737 cytoplasm; GO:0032991 macromolecular complex; GO:0044424 intracellular part; GO:0042555 MCM complex; GO:0005623 cell; GO:0044422 organelle part; GO:0044427 chromosomal part; GO:0043228 non-membrane-bounded organelle; GO:0005856 cytoskeleton; GO:0031974 membrane-enclosed lumen;…	GO:0003677 DNA binding; GO:0005524 ATP binding; GO:1901265 nucleoside phosphate binding; GO:0004386 helicase activity; GO:0001882 nucleoside binding; GO:0043167 ion binding; GO:0016817 hydrolase activity, acting on acid anhydrides; GO:0016787 hydrolase activity; GO:0000166 nucleotide binding; GO:0017111 nucleoside-triphosphatase activity; GO:1901363 heterocyclic compound binding; GO:0097159 organ…	K02541	MCM3; DNA replication licensing factor MCM3 [EC:3.6.4.12]	rno03030 DNA replication - Rattus norvegicus (rat); rno04110 Cell cycle - Rattus norvegicus (rat);	IPR001208; IPR003593; IPR012340; IPR027417; IPR033762; IPR027925;	MCM domain; AAA+ ATPase domain; Nucleic acid-binding, OB-fold; P-loop containing nucleoside triphosphate hydrolase; MCM OB domain; MCM N-terminal domain;
F1LRI6	442	0.629	Down	0.0133842	S	Serine/threonine-protein kinase TAO3 OS=Rattus norvegicus OX=10116 GN=Taok3 PE=1 SV=3	Taok3	0.939437	0.00851685	67.881	S(0.045)AS(0.939)LVT(0.015)R	2	0.56043	1	0.737958	0.893957	0.70162	1.37122	1.2898	1.04949	cytoplasm	GO:0044700 single organism signaling; GO:0032872 regulation of stress-activated MAPK cascade; GO:0032270 positive regulation of cellular protein metabolic process; GO:0043506 regulation of JUN kinase activity; GO:0010564 regulation of cell cycle process; GO:0044237 cellular metabolic process; GO:0071900 regulation of protein serine/threonine kinase activity; GO:0008152 metabolic process; GO:00440…	GO:0005623 cell; GO:0005622 intracellular; GO:0044464 cell part;	GO:0005524 ATP binding; GO:1901265 nucleoside phosphate binding; GO:0016773 phosphotransferase activity, alcohol group as acceptor; GO:0001882 nucleoside binding; GO:0043167 ion binding; GO:0004672 protein kinase activity; GO:0000166 nucleotide binding; GO:0097159 organic cyclic compound binding; GO:1901363 heterocyclic compound binding; GO:0032549 ribonucleoside binding; GO:0097367 carbohydrate …	K04429	TAO; thousand and one amino acid protein kinase [EC:2.7.11.1]	rno04010 MAPK signaling pathway - Rattus norvegicus (rat);	IPR000719; IPR011009;	Protein kinase domain; Protein kinase-like domain;
B1WC33	64	0.583	Down	0.0176001	S	CDC42 effector protein (Rho GTPase binding) 4 (Predicted), isoform CRA_a OS=Rattus norvegicus OX=10116 GN=Cdc42ep4 PE=1 SV=1	Cdc42ep4	0.999999	1.59042e-83	279.79	TGEPDGES(1)LDEQATSSK	2	0.46911	2	0.758789	0.581493	0.858398	1.46273	1.18163	1.12714	mitochondria	GO:0030833 regulation of actin filament polymerization; GO:0044700 single organism signaling; GO:0050794 regulation of cellular process; GO:0016043 cellular component organization; GO:0065008 regulation of biological quality; GO:0032273 positive regulation of protein polymerization; GO:0060491 regulation of cell projection assembly; GO:0032956 regulation of actin cytoskeleton organization; GO:004…	GO:0016020 membrane; GO:0043229 intracellular organelle; GO:0043232 intracellular non-membrane-bounded organelle; GO:0071944 cell periphery; GO:0030054 cell junction; GO:0005737 cytoplasm; GO:0070161 anchoring junction; GO:0044424 intracellular part; GO:0005913 cell-cell adherens junction; GO:0005911 cell-cell junction; GO:0005623 cell; GO:0015629 actin cytoskeleton; GO:0005886 plasma membrane; G…	GO:0031267 small GTPase binding; GO:0017048 Rho GTPase binding; GO:0003723 RNA binding; GO:0060589 nucleoside-triphosphatase regulator activity; GO:0030695 GTPase regulator activity; GO:0005515 protein binding; GO:0098772 molecular function regulator; GO:0017049 GTP-Rho binding; GO:1901363 heterocyclic compound binding; GO:0097159 organic cyclic compound binding; GO:0030234 enzyme regulator activ…				IPR000095;	CRIB domain;
B1WC33	103	0.541	Down	0.026038	S	CDC42 effector protein (Rho GTPase binding) 4 (Predicted), isoform CRA_a OS=Rattus norvegicus OX=10116 GN=Cdc42ep4 PE=1 SV=1	Cdc42ep4	1	0.0055625	74.92	DMLGS(1)LR	2	-0.34777	1	0.5625	0.583596	0.946289	1.49661	1.20888	1.16448	mitochondria	GO:0030833 regulation of actin filament polymerization; GO:0044700 single organism signaling; GO:0050794 regulation of cellular process; GO:0016043 cellular component organization; GO:0065008 regulation of biological quality; GO:0032273 positive regulation of protein polymerization; GO:0060491 regulation of cell projection assembly; GO:0032956 regulation of actin cytoskeleton organization; GO:004…	GO:0016020 membrane; GO:0043229 intracellular organelle; GO:0043232 intracellular non-membrane-bounded organelle; GO:0071944 cell periphery; GO:0030054 cell junction; GO:0005737 cytoplasm; GO:0070161 anchoring junction; GO:0044424 intracellular part; GO:0005913 cell-cell adherens junction; GO:0005911 cell-cell junction; GO:0005623 cell; GO:0015629 actin cytoskeleton; GO:0005886 plasma membrane; G…	GO:0031267 small GTPase binding; GO:0017048 Rho GTPase binding; GO:0003723 RNA binding; GO:0060589 nucleoside-triphosphatase regulator activity; GO:0030695 GTPase regulator activity; GO:0005515 protein binding; GO:0098772 molecular function regulator; GO:0017049 GTP-Rho binding; GO:1901363 heterocyclic compound binding; GO:0097159 organic cyclic compound binding; GO:0030234 enzyme regulator activ…				IPR000095;	CRIB domain;
B1WC33	116	0.76	Down	0.029335	S	CDC42 effector protein (Rho GTPase binding) 4 (Predicted), isoform CRA_a OS=Rattus norvegicus OX=10116 GN=Cdc42ep4 PE=1 SV=1	Cdc42ep4	1	6.48026e-05	100.11	NAMS(1)LPQLNEK	3	0.40196	3	0.810547	0.778128	0.995117	1.21104	1.12008	1.07064	mitochondria	GO:0030833 regulation of actin filament polymerization; GO:0044700 single organism signaling; GO:0050794 regulation of cellular process; GO:0016043 cellular component organization; GO:0065008 regulation of biological quality; GO:0032273 positive regulation of protein polymerization; GO:0060491 regulation of cell projection assembly; GO:0032956 regulation of actin cytoskeleton organization; GO:004…	GO:0016020 membrane; GO:0043229 intracellular organelle; GO:0043232 intracellular non-membrane-bounded organelle; GO:0071944 cell periphery; GO:0030054 cell junction; GO:0005737 cytoplasm; GO:0070161 anchoring junction; GO:0044424 intracellular part; GO:0005913 cell-cell adherens junction; GO:0005911 cell-cell junction; GO:0005623 cell; GO:0015629 actin cytoskeleton; GO:0005886 plasma membrane; G…	GO:0031267 small GTPase binding; GO:0017048 Rho GTPase binding; GO:0003723 RNA binding; GO:0060589 nucleoside-triphosphatase regulator activity; GO:0030695 GTPase regulator activity; GO:0005515 protein binding; GO:0098772 molecular function regulator; GO:0017049 GTP-Rho binding; GO:1901363 heterocyclic compound binding; GO:0097159 organic cyclic compound binding; GO:0030234 enzyme regulator activ…				IPR000095;	CRIB domain;
F1MAJ8	103	0.795	Down	0.047245	S	Zinc finger protein 91 OS=Rattus norvegicus OX=10116 GN=Zfp91 PE=1 SV=2	Zfp91	1	2.15337e-58	208.81	SSPSNRPPDGHGHQPAAAKPPS(1)PAQGK	5	0.029394	3	0.850402	0.900695	0.909001	1.23391	1.15521	0.956522	nucleus			GO:0097159 organic cyclic compound binding; GO:1901363 heterocyclic compound binding; GO:0005488 binding; GO:0003676 nucleic acid binding; GO:0043167 ion binding; GO:0043169 cation binding; GO:0046872 metal ion binding;				IPR015880; IPR007087; IPR013087;	Zinc finger, C2H2-like; Zinc finger, C2H2; Zinc finger C2H2-type/integrase DNA-binding domain;
D4A6K4	751	0.654	Down	0.0132216	S	Golgi autoantigen, golgin subfamily a, 1 (Predicted) OS=Rattus norvegicus OX=10116 GN=Golga1 PE=1 SV=1	Golga1	0.998743	6.75147e-06	118.51	GSIRPS(0.001)IS(0.999)NPR	3	0.75925	2	0.812198	0.72883	0.860687	1.02287	1.32577	1.32159	cytoplasm	GO:0046907 intracellular transport; GO:0034067 protein localization to Golgi apparatus; GO:0072594 establishment of protein localization to organelle; GO:0006891 intra-Golgi vesicle-mediated transport; GO:0016192 vesicle-mediated transport; GO:0000301 retrograde transport, vesicle recycling within Golgi; GO:0072600 establishment of protein localization to Golgi; GO:0048193 Golgi vesicle transport…	GO:0043229 intracellular organelle; GO:0044446 intracellular organelle part; GO:0005737 cytoplasm; GO:0012505 endomembrane system; GO:0044424 intracellular part; GO:0005623 cell; GO:0044422 organelle part; GO:0043231 intracellular membrane-bounded organelle; GO:0043226 organelle; GO:0005622 intracellular; GO:0044464 cell part; GO:0098791 Golgi subcompartment; GO:0005802 trans-Golgi network; GO:00…	GO:0005515 protein binding; GO:0005488 binding;	K16731	GOLGA1; golgin subfamily A member 1		IPR000237;	GRIP domain;
P10362	263	0.619	Down	0.026436	T	Secretogranin-2 OS=Rattus norvegicus OX=10116 GN=Scg2 PE=1 SV=1	Scg2	0.999464	2.24803e-48	234.73	IET(0.001)QT(0.999)QEEVRDS(1)KENTEK	3	-0.38925	12	0.775424	0.689655	0.782299	1.46941	1.21764	0.941659	endoplasmic reticulum	GO:0044700 single organism signaling; GO:0010941 regulation of cell death; GO:2000351 regulation of endothelial cell apoptotic process; GO:0051674 localization of cell; GO:0001568 blood vessel development; GO:0040017 positive regulation of locomotion; GO:0044699 single-organism process; GO:0044237 cellular metabolic process; GO:0006796 phosphate-containing compound metabolic process; GO:1904036 n…	GO:0097708 intracellular vesicle; GO:0043229 intracellular organelle; GO:0005615 extracellular space; GO:0044421 extracellular region part; GO:0031410 cytoplasmic vesicle; GO:0005737 cytoplasm; GO:0031982 vesicle; GO:0012505 endomembrane system; GO:0044424 intracellular part; GO:0005623 cell; GO:0005576 extracellular region; GO:0043226 organelle; GO:0005622 intracellular; GO:0044464 cell part; GO…	GO:0005125 cytokine activity; GO:0005515 protein binding; GO:0005102 receptor binding; GO:0042056 chemoattractant activity; GO:0005488 binding;
P10362	491	0.474	Down	0.037843	S	Secretogranin-2 OS=Rattus norvegicus OX=10116 GN=Scg2 PE=1 SV=1	Scg2	1	0.000170987	101.43	VAWIPDVES(1)R	2	0.46807	3	0.61017	0.573892	0.685656	1.7863	1.33302	0.828623	endoplasmic reticulum	GO:0044700 single organism signaling; GO:0010941 regulation of cell death; GO:2000351 regulation of endothelial cell apoptotic process; GO:0051674 localization of cell; GO:0001568 blood vessel development; GO:0040017 positive regulation of locomotion; GO:0044699 single-organism process; GO:0044237 cellular metabolic process; GO:0006796 phosphate-containing compound metabolic process; GO:1904036 n…	GO:0097708 intracellular vesicle; GO:0043229 intracellular organelle; GO:0005615 extracellular space; GO:0044421 extracellular region part; GO:0031410 cytoplasmic vesicle; GO:0005737 cytoplasm; GO:0031982 vesicle; GO:0012505 endomembrane system; GO:0044424 intracellular part; GO:0005623 cell; GO:0005576 extracellular region; GO:0043226 organelle; GO:0005622 intracellular; GO:0044464 cell part; GO…	GO:0005125 cytokine activity; GO:0005515 protein binding; GO:0005102 receptor binding; GO:0042056 chemoattractant activity; GO:0005488 binding;
P10362	108	1.284	Up	0.0169842	S	Secretogranin-2 OS=Rattus norvegicus OX=10116 GN=Scg2 PE=1 SV=1	Scg2	1	0.000464542	84.734	DVLS(1)EDEWMR	2	-1.0579	1	1.0286	1.26355	1.1414	0.926941	0.878987	0.867821	endoplasmic reticulum	GO:0044700 single organism signaling; GO:0010941 regulation of cell death; GO:2000351 regulation of endothelial cell apoptotic process; GO:0051674 localization of cell; GO:0001568 blood vessel development; GO:0040017 positive regulation of locomotion; GO:0044699 single-organism process; GO:0044237 cellular metabolic process; GO:0006796 phosphate-containing compound metabolic process; GO:1904036 n…	GO:0097708 intracellular vesicle; GO:0043229 intracellular organelle; GO:0005615 extracellular space; GO:0044421 extracellular region part; GO:0031410 cytoplasmic vesicle; GO:0005737 cytoplasm; GO:0031982 vesicle; GO:0012505 endomembrane system; GO:0044424 intracellular part; GO:0005623 cell; GO:0005576 extracellular region; GO:0043226 organelle; GO:0005622 intracellular; GO:0044464 cell part; GO…	GO:0005125 cytokine activity; GO:0005515 protein binding; GO:0005102 receptor binding; GO:0042056 chemoattractant activity; GO:0005488 binding;
Q68FX7	327	0.723	Down	0.0259	T	THO complex subunit 5 homolog OS=Rattus norvegicus OX=10116 GN=Thoc5 PE=2 SV=1	Thoc5	1	1.93774e-07	131.56	RRPT(1)LGVQLDDK	4	-0.45215	3	0.771287	0.948433	0.785276	1.27132	1.17711	1.01407	nucleus	GO:0050658 RNA transport; GO:0009891 positive regulation of biosynthetic process; GO:0051169 nuclear transport; GO:0044237 cellular metabolic process; GO:0015031 protein transport; GO:1902583 multi-organism intracellular transport; GO:0008152 metabolic process; GO:0015931 nucleobase-containing compound transport; GO:0032784 regulation of DNA-templated transcription, elongation; GO:0043170 macromo…	GO:0000784 nuclear chromosome, telomeric region; GO:0000781 chromosome, telomeric region; GO:0005737 cytoplasm; GO:0032991 macromolecular complex; GO:0044424 intracellular part; GO:0000445 THO complex part of transcription export complex; GO:0005623 cell; GO:0044422 organelle part; GO:0044427 chromosomal part; GO:0043228 non-membrane-bounded organelle; GO:0031974 membrane-enclosed lumen; GO:00056…	GO:0097159 organic cyclic compound binding; GO:1901363 heterocyclic compound binding; GO:0003729 mRNA binding; GO:0003723 RNA binding; GO:0005488 binding; GO:0003676 nucleic acid binding;	K13174	THOC5; THO complex subunit 5	rno03013 RNA transport - Rattus norvegicus (rat);
M0R6E0	295	1.268	Up	0.0113847	S	Phospholipid-transporting ATPase OS=Rattus norvegicus OX=10116 GN=Atp9a PE=1 SV=2	Atp9a	0.9999	0.00244571	61.265	RDS(1)KIPGTVVR	3	0.25929	1	1.1275	1.15531	1.10726	0.898157	0.968504	0.807729	plasma membrane	GO:0016043 cellular component organization; GO:0065008 regulation of biological quality; GO:0006869 lipid transport; GO:0044763 single-organism cellular process; GO:0044802 single-organism membrane organization; GO:0044699 single-organism process; GO:0045332 phospholipid translocation; GO:0071702 organic substance transport; GO:0097035 regulation of membrane lipid distribution; GO:0010876 lipid l…	GO:0097708 intracellular vesicle; GO:0043229 intracellular organelle; GO:0016020 membrane; GO:0031410 cytoplasmic vesicle; GO:0031982 vesicle; GO:0044446 intracellular organelle part; GO:0005737 cytoplasm; GO:0031224 intrinsic component of membrane; GO:0012505 endomembrane system; GO:0044424 intracellular part; GO:0005623 cell; GO:0016021 integral component of membrane; GO:0044422 organelle part;…	GO:1901265 nucleoside phosphate binding; GO:0005319 lipid transporter activity; GO:0016817 hydrolase activity, acting on acid anhydrides; GO:0022892 substrate-specific transporter activity; GO:0016787 hydrolase activity; GO:0016887 ATPase activity; GO:0097159 organic cyclic compound binding; GO:1901363 heterocyclic compound binding; GO:0016462 pyrophosphatase activity; GO:0003824 catalytic activi…	K01530	E3.6.3.1; phospholipid-translocating ATPase [EC:3.6.3.1]		IPR032630; IPR008250; IPR023299; IPR023214;	P-type ATPase, C-terminal; P-type ATPase, A domain; P-type ATPase, cytoplasmic domain N; HAD-like domain;
A0A0G2JX20	360	1.272	Up	0.0111017	S	Katanin p80 WD40 repeat-containing subunit B1 OS=Rattus norvegicus OX=10116 GN=Katnb1 PE=3 SV=1	Katnb1	0.976916	5.31941e-12	166.62	RS(0.977)PS(0.023)SEDDKDER	4	-0.12819	2	1.07965	1.19588	1.10611	0.813008	0.899414	0.945736	extracellular	GO:0045666 positive regulation of neuron differentiation; GO:0010941 regulation of cell death; GO:0043243 positive regulation of protein complex disassembly; GO:0048869 cellular developmental process; GO:0007067 mitotic nuclear division; GO:0022008 neurogenesis; GO:0044699 single-organism process; GO:0031110 regulation of microtubule polymerization or depolymerization; GO:0051234 establishment of…	GO:0044450 microtubule organizing center part; GO:0005874 microtubule; GO:0005737 cytoplasm; GO:0043025 neuronal cell body; GO:0032991 macromolecular complex; GO:0030426 growth cone; GO:0099512 supramolecular fiber; GO:0044424 intracellular part; GO:0099080 supramolecular complex; GO:0005623 cell; GO:0044422 organelle part; GO:0043228 non-membrane-bounded organelle; GO:0005856 cytoskeleton; GO:00…	GO:0015631 tubulin binding; GO:0005515 protein binding; GO:0008092 cytoskeletal protein binding; GO:0008017 microtubule binding; GO:0005488 binding;	K18643	KATNB1; katanin p80 WD40 repeat-containing subunit B1		IPR017986; IPR028021;	WD40-repeat-containing domain; Katanin p80 subunit, C-terminal;
Q64548	273	0.643	Down	0.029255	S	Reticulon-1 OS=Rattus norvegicus OX=10116 GN=Rtn1 PE=1 SV=1	Rtn1	0.998185	9.42595e-05	111.27	MS(0.998)LVT(0.002)APVK	3	-0.42197	2	0.72392	0.636364	0.984925	1.16926	1.33034	1.14979	nucleus		GO:0005790 smooth endoplasmic reticulum; GO:0043229 intracellular organelle; GO:0016020 membrane; GO:0042175 nuclear outer membrane-endoplasmic reticulum membrane network; GO:0005783 endoplasmic reticulum; GO:0044446 intracellular organelle part; GO:0005737 cytoplasm; GO:0031224 intrinsic component of membrane; GO:0012505 endomembrane system; GO:0044424 intracellular part; GO:0005623 cell; GO:001…		K20721	RTN1; reticulon-1		IPR003388;	Reticulon;
F1MAL5	772	0.695	Down	0.043541	T	Insulin receptor substrate 2 OS=Rattus norvegicus OX=10116 GN=Irs2 PE=1 SV=2	Irs2	0.997015	5.07805e-12	113.43	LLPNGDYLNMSPSEAGT(0.002)AGT(0.997)PPDFFS(0.001)AALRPGGEALK	4	3.1597	1	0.778196	0.771084	0.941872	1.4511	1.04326	1.08854	nucleus	GO:0044700 single organism signaling; GO:0002694 regulation of leukocyte activation; GO:0065008 regulation of biological quality; GO:0010941 regulation of cell death; GO:0030335 positive regulation of cell migration; GO:0048732 gland development; GO:0032944 regulation of mononuclear cell proliferation; GO:0032885 regulation of polysaccharide biosynthetic process; GO:0007166 cell surface receptor …	GO:0016020 membrane; GO:0071944 cell periphery; GO:0044464 cell part; GO:0005622 intracellular; GO:0005737 cytoplasm; GO:0032991 macromolecular complex; GO:0044424 intracellular part; GO:0043234 protein complex; GO:0005829 cytosol; GO:0005623 cell; GO:0005886 plasma membrane; GO:0044444 cytoplasmic part;	GO:0019903 protein phosphatase binding; GO:0005102 receptor binding; GO:0044877 macromolecular complex binding; GO:0019901 protein kinase binding; GO:0071889 14-3-3 protein binding; GO:0005515 protein binding; GO:0019900 kinase binding; GO:0004871 signal transducer activity; GO:0005158 insulin receptor binding; GO:0043548 phosphatidylinositol 3-kinase binding; GO:0005488 binding; GO:0019904 prote…	K07187	IRS2; insulin receptor substrate 2	rno04022 cGMP-PKG signaling pathway - Rattus norvegicus (rat); rno04068 FoxO signaling pathway - Rattus norvegicus (rat); rno04140 Autophagy - animal - Rattus norvegicus (rat); rno04152 AMPK signaling pathway - Rattus norvegicus (rat); rno04211 Longevity regulating pathway - Rattus norvegicus (rat); rno04213 Longevity regulating pathway - multiple species - Rattus norvegicus (rat); rno04910 Insul…	IPR011993; IPR002404; IPR001849;	PH domain-like; IRS-type PTB domain; Pleckstrin homology domain;
F1MAL5	67	0.763	Down	0.022724	S	Insulin receptor substrate 2 OS=Rattus norvegicus OX=10116 GN=Irs2 PE=1 SV=2	Irs2	1	1.03705e-07	103.53	GPGTGGEEAAAAGGS(1)PPQPPR	3	0.35179	1	0.890977	0.917516	0.805911	1.12723	1.02458	1.27469	nucleus	GO:0044700 single organism signaling; GO:0002694 regulation of leukocyte activation; GO:0065008 regulation of biological quality; GO:0010941 regulation of cell death; GO:0030335 positive regulation of cell migration; GO:0048732 gland development; GO:0032944 regulation of mononuclear cell proliferation; GO:0032885 regulation of polysaccharide biosynthetic process; GO:0007166 cell surface receptor …	GO:0016020 membrane; GO:0071944 cell periphery; GO:0044464 cell part; GO:0005622 intracellular; GO:0005737 cytoplasm; GO:0032991 macromolecular complex; GO:0044424 intracellular part; GO:0043234 protein complex; GO:0005829 cytosol; GO:0005623 cell; GO:0005886 plasma membrane; GO:0044444 cytoplasmic part;	GO:0019903 protein phosphatase binding; GO:0005102 receptor binding; GO:0044877 macromolecular complex binding; GO:0019901 protein kinase binding; GO:0071889 14-3-3 protein binding; GO:0005515 protein binding; GO:0019900 kinase binding; GO:0004871 signal transducer activity; GO:0005158 insulin receptor binding; GO:0043548 phosphatidylinositol 3-kinase binding; GO:0005488 binding; GO:0019904 prote…	K07187	IRS2; insulin receptor substrate 2	rno04022 cGMP-PKG signaling pathway - Rattus norvegicus (rat); rno04068 FoxO signaling pathway - Rattus norvegicus (rat); rno04140 Autophagy - animal - Rattus norvegicus (rat); rno04152 AMPK signaling pathway - Rattus norvegicus (rat); rno04211 Longevity regulating pathway - Rattus norvegicus (rat); rno04213 Longevity regulating pathway - multiple species - Rattus norvegicus (rat); rno04910 Insul…	IPR011993; IPR002404; IPR001849;	PH domain-like; IRS-type PTB domain; Pleckstrin homology domain;
D4A3D8	29	0.625	Down	0.0100156	S	XPC complex subunit, DNA damage recognition and repair factor OS=Rattus norvegicus OX=10116 GN=Xpc PE=1 SV=1	Xpc	1	7.6083e-22	180.64	ATRPEES(1)DADDFEDEK	2	0.70756	4	0.682163	0.698529	0.909002	1.31992	1.22525	1.11952	nucleus	GO:0006289 nucleotide-excision repair; GO:0034644 cellular response to UV; GO:0031573 intra-S DNA damage checkpoint; GO:0044699 single-organism process; GO:0010564 regulation of cell cycle process; GO:0044237 cellular metabolic process; GO:0009605 response to external stimulus; GO:0045930 negative regulation of mitotic cell cycle; GO:0008152 metabolic process; GO:0000077 DNA damage checkpoint; GO…	GO:0016020 membrane; GO:0044421 extracellular region part; GO:0071944 cell periphery; GO:0031982 vesicle; GO:0005737 cytoplasm; GO:0032991 macromolecular complex; GO:0044424 intracellular part; GO:0005623 cell; GO:0044422 organelle part; GO:0043228 non-membrane-bounded organelle; GO:0070062 extracellular exosome; GO:0031974 membrane-enclosed lumen; GO:0070013 intracellular organelle lumen; GO:000…	GO:0097159 organic cyclic compound binding; GO:1901363 heterocyclic compound binding; GO:0003697 single-stranded DNA binding; GO:0003677 DNA binding; GO:0003684 damaged DNA binding; GO:0005488 binding; GO:0003676 nucleic acid binding;	K10838	XPC; xeroderma pigmentosum group C-complementing protein	rno03420 Nucleotide excision repair - Rattus norvegicus (rat);	IPR018326; IPR018328; IPR018325; IPR018327;	Rad4 beta-hairpin domain 1; Rad4 beta-hairpin domain 3; Rad4/PNGase transglutaminase-like fold; Rad4 beta-hairpin domain 2;
Q9EQL9	307	1.33	Up	0.021236	S	Sharpin OS=Rattus norvegicus OX=10116 GN=Sharpin PE=1 SV=1	Sharpin	0.999991	1.78022e-14	184.44	EVSGHS(1)PQHSK	4	0.25398	2	1.18384	1.07646	1.16684	0.799788	0.788153	0.988214	extracellular	GO:0044085 cellular component biogenesis; GO:0031424 keratinization; GO:0007420 brain development; GO:0023051 regulation of signaling; GO:0048869 cellular developmental process; GO:1902533 positive regulation of intracellular signal transduction; GO:0044699 single-organism process; GO:0031347 regulation of defense response; GO:0044237 cellular metabolic process; GO:0009913 epidermal cell differen…	GO:0030425 dendrite; GO:0042995 cell projection; GO:0030054 cell junction; GO:0005737 cytoplasm; GO:0032991 macromolecular complex; GO:0044424 intracellular part; GO:1990234 transferase complex; GO:0005829 cytosol; GO:0005623 cell; GO:0032279 asymmetric synapse; GO:0045202 synapse; GO:0043226 organelle; GO:0036477 somatodendritic compartment; GO:1902494 catalytic complex; GO:0098794 postsynapse; …	GO:0031593 polyubiquitin binding; GO:0019787 ubiquitin-like protein transferase activity; GO:0044877 macromolecular complex binding; GO:0043167 ion binding; GO:0005515 protein binding; GO:0008270 zinc ion binding; GO:0032182 ubiquitin-like protein binding; GO:0042802 identical protein binding; GO:0046914 transition metal ion binding; GO:0003824 catalytic activity; GO:0005488 binding; GO:0004842 u…	K20894	SHARPIN; shank-associated RH domain-interacting protein	rno04217 Necroptosis - Rattus norvegicus (rat); rno04621 NOD-like receptor signaling pathway - Rattus norvegicus (rat);	IPR029071; IPR031912; IPR001876;	Ubiquitin-related domain; Sharpin, PH domain; Zinc finger, RanBP2-type;
D3ZX42	497	0.808	Down	0.00063781	S	G protein-coupled receptor 21 (Predicted), isoform CRA_a OS=Rattus norvegicus OX=10116 GN=Rabgap1 PE=1 SV=1	Rabgap1	0.825085	2.29965e-16	124.73	LPQS(0.062)GS(0.825)QS(0.11)S(0.003)MIPSPPEDDEEEDNDEPLLSGFGDVSK	4	1.068	2	0.913	0.872709	0.853561	1.07401	1.10887	1.0826	cytoplasm	GO:0050794 regulation of cellular process; GO:0060627 regulation of vesicle-mediated transport; GO:0046907 intracellular transport; GO:0044699 single-organism process; GO:0031338 regulation of vesicle fusion; GO:0015031 protein transport; GO:0051234 establishment of localization; GO:0090630 activation of GTPase activity; GO:0051649 establishment of localization in cell; GO:0051345 positive regula…	GO:0005622 intracellular; GO:0044464 cell part; GO:0005737 cytoplasm; GO:0012505 endomembrane system; GO:0044424 intracellular part; GO:0005623 cell; GO:0005829 cytosol; GO:0044444 cytoplasmic part;	GO:0031267 small GTPase binding; GO:0003677 DNA binding; GO:0060589 nucleoside-triphosphatase regulator activity; GO:0030695 GTPase regulator activity; GO:0005515 protein binding; GO:0098772 molecular function regulator; GO:0017137 Rab GTPase binding; GO:1901363 heterocyclic compound binding; GO:0097159 organic cyclic compound binding; GO:0030234 enzyme regulator activity; GO:0017016 Ras GTPase b…	K20284	RABGAP1, GAPCENA; Rab GTPase-activating protein 1		IPR009057; IPR011993; IPR022164; IPR000195; IPR006020;	Homeobox domain-like; PH domain-like; Kinesin-like; Rab-GTPase-TBC domain; PTB/PI domain;
D3ZX42	500	0.655	Down	0.002796	S	G protein-coupled receptor 21 (Predicted), isoform CRA_a OS=Rattus norvegicus OX=10116 GN=Rabgap1 PE=1 SV=1	Rabgap1	0.876204	0.00136942	49.976	LPQS(0.091)GS(0.622)QS(0.375)S(0.876)MIPS(0.035)PPEDDEEEDNDEPLLS(0.001)GFGDVSK	4	-1.5025	1	0.831	0.747454	0.750251	1.21739	1.27419	1.06414	cytoplasm	GO:0050794 regulation of cellular process; GO:0060627 regulation of vesicle-mediated transport; GO:0046907 intracellular transport; GO:0044699 single-organism process; GO:0031338 regulation of vesicle fusion; GO:0015031 protein transport; GO:0051234 establishment of localization; GO:0090630 activation of GTPase activity; GO:0051649 establishment of localization in cell; GO:0051345 positive regula…	GO:0005622 intracellular; GO:0044464 cell part; GO:0005737 cytoplasm; GO:0012505 endomembrane system; GO:0044424 intracellular part; GO:0005623 cell; GO:0005829 cytosol; GO:0044444 cytoplasmic part;	GO:0031267 small GTPase binding; GO:0003677 DNA binding; GO:0060589 nucleoside-triphosphatase regulator activity; GO:0030695 GTPase regulator activity; GO:0005515 protein binding; GO:0098772 molecular function regulator; GO:0017137 Rab GTPase binding; GO:1901363 heterocyclic compound binding; GO:0097159 organic cyclic compound binding; GO:0030234 enzyme regulator activity; GO:0017016 Ras GTPase b…	K20284	RABGAP1, GAPCENA; Rab GTPase-activating protein 1		IPR009057; IPR011993; IPR022164; IPR000195; IPR006020;	Homeobox domain-like; PH domain-like; Kinesin-like; Rab-GTPase-TBC domain; PTB/PI domain;
A0A0G2JZM8	692	0.781	Down	0.046641	S	CLIP-associating protein 2 OS=Rattus norvegicus OX=10116 GN=Clasp2 PE=1 SV=1	Clasp2	1	0.000594445	94.673	MVS(0.002)QS(0.998)QPGS(1)R	2	-4.1639	3	0.933262	0.742394	0.920802	1.08	1.21258	1.03349	cytoplasm		GO:0043226 organelle; GO:0043231 intracellular membrane-bounded organelle; GO:0043229 intracellular organelle; GO:0044464 cell part; GO:0005622 intracellular; GO:0005737 cytoplasm; GO:0012505 endomembrane system; GO:0044424 intracellular part; GO:0043227 membrane-bounded organelle; GO:0005794 Golgi apparatus; GO:0005829 cytosol; GO:0005623 cell; GO:0044444 cytoplasmic part;	GO:0005488 binding;	K16578	CLASP1_2; CLIP-associating protein 1/2		IPR034085; IPR011989; IPR024395; IPR016024;	TOG domain; Armadillo-like helical; CLASP N-terminal domain; Armadillo-type fold;
A0A0G2JZM8	255	0.832	Down	0.046759	S	CLIP-associating protein 2 OS=Rattus norvegicus OX=10116 GN=Clasp2 PE=1 SV=1	Clasp2	0.75101	3.30805e-25	162.47	SFDDEESVDGNRPS(0.249)S(0.751)AASAFK	3	-0.38067	1	0.925727	0.863083	0.91126	1.214	1.01621	1.0134	cytoplasm		GO:0043226 organelle; GO:0043231 intracellular membrane-bounded organelle; GO:0043229 intracellular organelle; GO:0044464 cell part; GO:0005622 intracellular; GO:0005737 cytoplasm; GO:0012505 endomembrane system; GO:0044424 intracellular part; GO:0043227 membrane-bounded organelle; GO:0005794 Golgi apparatus; GO:0005829 cytosol; GO:0005623 cell; GO:0044444 cytoplasmic part;	GO:0005488 binding;	K16578	CLASP1_2; CLIP-associating protein 1/2		IPR034085; IPR011989; IPR024395; IPR016024;	TOG domain; Armadillo-like helical; CLASP N-terminal domain; Armadillo-type fold;
A0A0G2JZM8	603	0.734	Down	0.039482	S	CLIP-associating protein 2 OS=Rattus norvegicus OX=10116 GN=Clasp2 PE=1 SV=1	Clasp2	0.9384	8.36867e-10	125.23	S(0.062)RS(0.938)DIDVNAAAGAK	2	-0.69802	6	0.843918	0.682556	0.975191	1.133	1.18398	1.09282	cytoplasm		GO:0043226 organelle; GO:0043231 intracellular membrane-bounded organelle; GO:0043229 intracellular organelle; GO:0044464 cell part; GO:0005622 intracellular; GO:0005737 cytoplasm; GO:0012505 endomembrane system; GO:0044424 intracellular part; GO:0043227 membrane-bounded organelle; GO:0005794 Golgi apparatus; GO:0005829 cytosol; GO:0005623 cell; GO:0044444 cytoplasmic part;	GO:0005488 binding;	K16578	CLASP1_2; CLIP-associating protein 1/2		IPR034085; IPR011989; IPR024395; IPR016024;	TOG domain; Armadillo-like helical; CLASP N-terminal domain; Armadillo-type fold;
B2GUW3	338	0.558	Down	0.00061539	S	Hdac11 protein OS=Rattus norvegicus OX=10116 GN=Hdac11 PE=2 SV=1	Hdac11	0.989769	7.06532e-05	125.95	NS(0.01)S(0.99)IPLLSR	2	0.50285	1	0.708487	0.752203	0.705151	1.15564	1.38054	1.34701	cytoplasm	GO:0016043 cellular component organization; GO:0044707 single-multicellular organism process; GO:0016570 histone modification; GO:0048869 cellular developmental process; GO:0044267 cellular protein metabolic process; GO:0022008 neurogenesis; GO:0044699 single-organism process; GO:0014003 oligodendrocyte development; GO:0044237 cellular metabolic process; GO:0048468 cell development; GO:0071704 or…	GO:0016020 membrane; GO:0043229 intracellular organelle; GO:0044421 extracellular region part; GO:0071944 cell periphery; GO:0044446 intracellular organelle part; GO:0031982 vesicle; GO:0031981 nuclear lumen; GO:0032991 macromolecular complex; GO:0044424 intracellular part; GO:0005623 cell; GO:0005576 extracellular region; GO:0044422 organelle part; GO:0000118 histone deacetylase complex; GO:0005…	GO:0004407 histone deacetylase activity; GO:0019213 deacetylase activity; GO:0016787 hydrolase activity; GO:0016811 hydrolase activity, acting on carbon-nitrogen (but not peptide) bonds, in linear amides; GO:0033558 protein deacetylase activity; GO:0003824 catalytic activity; GO:0016810 hydrolase activity, acting on carbon-nitrogen (but not peptide) bonds;	K11418	HDAC11; histone deacetylase 11 [EC:3.5.1.98]	rno05034 Alcoholism - Rattus norvegicus (rat); rno05203 Viral carcinogenesis - Rattus norvegicus (rat);	IPR023801;	Histone deacetylase domain;
Q63083	223	0.825	Down	0.0032753	S	Nucleobindin-1 OS=Rattus norvegicus OX=10116 GN=Nucb1 PE=1 SV=1	Nucb1	1	0.000114788	92.039	VNVPGS(1)QAQLK	3	1.4963	1	0.882591	0.923988	0.911355	1.15784	1.07339	1.06175	extracellular	GO:0072718 response to cisplatin; GO:1903533 regulation of protein targeting; GO:0051049 regulation of transport; GO:0032386 regulation of intracellular transport; GO:0050896 response to stimulus; GO:0070201 regulation of establishment of protein localization; GO:0060341 regulation of cellular localization; GO:0042221 response to chemical; GO:0050789 regulation of biological process; GO:0032879 r…	GO:0016020 membrane; GO:0005783 endoplasmic reticulum; GO:0005615 extracellular space; GO:0044421 extracellular region part; GO:0019898 extrinsic component of membrane; GO:0031410 cytoplasmic vesicle; GO:0031090 organelle membrane; GO:0031982 vesicle; GO:0005801 cis-Golgi network; GO:0005737 cytoplasm; GO:0044424 intracellular part; GO:0005623 cell; GO:0044422 organelle part; GO:0005769 early end…	GO:0097159 organic cyclic compound binding; GO:1901363 heterocyclic compound binding; GO:0003677 DNA binding; GO:0005488 binding; GO:0043167 ion binding; GO:0003676 nucleic acid binding; GO:0046872 metal ion binding; GO:0043169 cation binding; GO:0005515 protein binding; GO:0001965 G-protein alpha-subunit binding; GO:0005509 calcium ion binding;	K20371	NUCB; nucleobindin		IPR011992; IPR002048;	EF-hand domain pair; EF-hand domain;
D3ZYT8	319	0.641	Down	0.0139582	S	Phosphoinositide kinase, FYVE-type zinc finger-containing OS=Rattus norvegicus OX=10116 GN=Pikfyve PE=1 SV=2	Pikfyve	0.849474	1.2901e-07	138.28	S(0.107)AS(0.849)IT(0.043)NLSLDR	2	0.096677	2	0.784237	0.644596	0.907165	1.11713	1.22877	1.30031	nucleus	GO:0044085 cellular component biogenesis; GO:0044700 single organism signaling; GO:0046486 glycerolipid metabolic process; GO:0007272 ensheathment of neurons; GO:0048869 cellular developmental process; GO:0046854 phosphatidylinositol phosphorylation; GO:0032989 cellular component morphogenesis; GO:0044699 single-organism process; GO:0044255 cellular lipid metabolic process; GO:1902115 regulation …	GO:0016020 membrane; GO:0031410 cytoplasmic vesicle; GO:0031090 organelle membrane; GO:0098857 membrane microdomain; GO:0030054 cell junction; GO:0005737 cytoplasm; GO:0031982 vesicle; GO:0044433 cytoplasmic vesicle part; GO:0044424 intracellular part; GO:0005911 cell-cell junction; GO:0005623 cell; GO:0044422 organelle part; GO:0005769 early endosome; GO:0044425 membrane part; GO:0005622 intrace…	GO:1901265 nucleoside phosphate binding; GO:0016773 phosphotransferase activity, alcohol group as acceptor; GO:0097159 organic cyclic compound binding; GO:1901363 heterocyclic compound binding; GO:0016301 kinase activity; GO:0032553 ribonucleotide binding; GO:0003824 catalytic activity; GO:0005488 binding; GO:0032550 purine ribonucleoside binding; GO:0043169 cation binding; GO:0043168 anion bindi…	K00921	PIKFYVE, FAB1; 1-phosphatidylinositol-3-phosphate 5-kinase [EC:2.7.1.150]	rno00562 Inositol phosphate metabolism - Rattus norvegicus (rat); rno01100 Metabolic pathways - Rattus norvegicus (rat); rno04070 Phosphatidylinositol signaling system - Rattus norvegicus (rat); rno04145 Phagosome - Rattus norvegicus (rat); rno04810 Regulation of actin cytoskeleton - Rattus norvegicus (rat);	IPR011991; IPR027410; IPR027409; IPR027483; IPR027484; IPR000306; IPR017455; IPR013083; IPR011011; IPR000591; IPR002498;	Winged helix-turn-helix DNA-binding domain; TCP-1-like chaperonin intermediate domain; GroEL-like apical domain; Phosphatidylinositol-4-phosphate 5-kinase, C-terminal; Phosphatidylinositol-4-phosphate 5-kinase, N-terminal domain; FYVE zinc finger; Zinc finger, FYVE-related; Zinc finger, RING/FYVE/PHD-type; Zinc finger, FYVE/PHD-type; DEP domain; Phosphatidylinositol-4-phosphate 5-kinase, core;
D4ADS9	692	0.716	Down	0.021064	S	EFR3 homolog A OS=Rattus norvegicus OX=10116 GN=Efr3a PE=1 SV=1	Efr3a	1	4.15616e-32	189.99	LSVPYVPQVTDEDRLS(1)R	3	1.4085	1	0.848485	0.726654	0.928144	1.1423	1.2914	1.06379	mitochondria	GO:0016043 cellular component organization; GO:0010256 endomembrane system organization; GO:0072657 protein localization to membrane; GO:0044763 single-organism cellular process; GO:0090002 establishment of protein localization to plasma membrane; GO:0044802 single-organism membrane organization; GO:0044699 single-organism process; GO:0007009 plasma membrane organization; GO:1990778 protein local…	GO:0016020 membrane; GO:0044421 extracellular region part; GO:0071944 cell periphery; GO:0005737 cytoplasm; GO:0031982 vesicle; GO:0044424 intracellular part; GO:0005829 cytosol; GO:0005623 cell; GO:0005576 extracellular region; GO:0005886 plasma membrane; GO:0043226 organelle; GO:0070062 extracellular exosome; GO:0044464 cell part; GO:0005622 intracellular; GO:1903561 extracellular vesicle; GO:0…	GO:0005488 binding;	K21842	EFR3; protein EFR3		IPR011989; IPR016024;	Armadillo-like helical; Armadillo-type fold;
Q04931	659	1.276	Up	0.042477	S	FACT complex subunit SSRP1 OS=Rattus norvegicus OX=10116 GN=Ssrp1 PE=1 SV=2	Ssrp1	0.988825	0.00279948	84.687	QLS(0.011)DS(0.989)FK	3	-0.46715	2	1.05577	1.04986	1.27255	0.816786	0.85497	0.975309	nucleus	GO:0050794 regulation of cellular process; GO:0033554 cellular response to stress; GO:0006260 DNA replication; GO:0006725 cellular aromatic compound metabolic process; GO:0097659 nucleic acid-templated transcription; GO:0060255 regulation of macromolecule metabolic process; GO:0006259 DNA metabolic process; GO:0019219 regulation of nucleobase-containing compound metabolic process; GO:0009058 bios…	GO:0043229 intracellular organelle; GO:0043232 intracellular non-membrane-bounded organelle; GO:0044446 intracellular organelle part; GO:0031981 nuclear lumen; GO:0044424 intracellular part; GO:0005730 nucleolus; GO:0005623 cell; GO:0044422 organelle part; GO:0043228 non-membrane-bounded organelle; GO:0043231 intracellular membrane-bounded organelle; GO:0043226 organelle; GO:0031974 membrane-encl…	GO:0097159 organic cyclic compound binding; GO:1901363 heterocyclic compound binding; GO:0003677 DNA binding; GO:0003723 RNA binding; GO:0003682 chromatin binding; GO:0005488 binding; GO:0003676 nucleic acid binding;	K09272	SSRP1; structure-specific recognition protein 1		IPR013719; IPR011993; IPR009071; IPR024954;	Domain of unknown function DUF1747; PH domain-like; High mobility group box domain; SSRP1 domain;
Q6MG75	181	1.322	Up	0.022825	S	Negative elongation factor complex member E OS=Rattus norvegicus OX=10116 GN=Nelfe PE=1 SV=1	Nelfe	0.806758	0.0149697	59.368	S(0.054)S(0.14)AS(0.807)PPR	2	1.0876	2	1.22539	1.054	1.17378	0.765916	0.897358	0.94864	nucleus	GO:0032270 positive regulation of cellular protein metabolic process; GO:0034244 negative regulation of transcription elongation from RNA polymerase II promoter; GO:0023051 regulation of signaling; GO:1902533 positive regulation of intracellular signal transduction; GO:0009891 positive regulation of biosynthetic process; GO:0050686 negative regulation of mRNA processing; GO:1903312 negative regul…	GO:0016020 membrane; GO:0043229 intracellular organelle; GO:0071944 cell periphery; GO:0044446 intracellular organelle part; GO:0032991 macromolecular complex; GO:0031981 nuclear lumen; GO:0044424 intracellular part; GO:0016604 nuclear body; GO:0005623 cell; GO:0044422 organelle part; GO:0005886 plasma membrane; GO:0043226 organelle; GO:0043231 intracellular membrane-bounded organelle; GO:0031974…	GO:0097159 organic cyclic compound binding; GO:1901363 heterocyclic compound binding; GO:0003723 RNA binding; GO:1901265 nucleoside phosphate binding; GO:0005488 binding; GO:0003676 nucleic acid binding; GO:0003682 chromatin binding; GO:0000166 nucleotide binding; GO:0036094 small molecule binding;	K15182	RDBP, NELFE; negative elongation factor E		IPR000504; IPR012677;	RNA recognition motif domain; Nucleotide-binding alpha-beta plait domain;
Q6MG75	178	1.238	Up	0.036618	S	Negative elongation factor complex member E OS=Rattus norvegicus OX=10116 GN=Nelfe PE=1 SV=1	Nelfe	0.820226	0.00318167	81.642	S(0.82)S(0.09)AS(0.09)PPR	2	0.67008	2	1.14665	1.095	1.10718	0.860921	0.817073	1.02719	nucleus	GO:0032270 positive regulation of cellular protein metabolic process; GO:0034244 negative regulation of transcription elongation from RNA polymerase II promoter; GO:0023051 regulation of signaling; GO:1902533 positive regulation of intracellular signal transduction; GO:0009891 positive regulation of biosynthetic process; GO:0050686 negative regulation of mRNA processing; GO:1903312 negative regul…	GO:0016020 membrane; GO:0043229 intracellular organelle; GO:0071944 cell periphery; GO:0044446 intracellular organelle part; GO:0032991 macromolecular complex; GO:0031981 nuclear lumen; GO:0044424 intracellular part; GO:0016604 nuclear body; GO:0005623 cell; GO:0044422 organelle part; GO:0005886 plasma membrane; GO:0043226 organelle; GO:0043231 intracellular membrane-bounded organelle; GO:0031974…	GO:0097159 organic cyclic compound binding; GO:1901363 heterocyclic compound binding; GO:0003723 RNA binding; GO:1901265 nucleoside phosphate binding; GO:0005488 binding; GO:0003676 nucleic acid binding; GO:0003682 chromatin binding; GO:0000166 nucleotide binding; GO:0036094 small molecule binding;	K15182	RDBP, NELFE; negative elongation factor E		IPR000504; IPR012677;	RNA recognition motif domain; Nucleotide-binding alpha-beta plait domain;
A0A0G2K7Y2	203	1.277	Up	0.00034255	T	Oxidation resistance protein 1 OS=Rattus norvegicus OX=10116 GN=Oxr1 PE=1 SV=1	Oxr1	0.888756	2.11954e-26	197.67	VVS(0.015)S(0.105)T(0.889)S(0.991)EEEEAFTEK	3	0.2596	2	1.17369	1.09788	1.12461	0.874008	0.901655	0.883269	nucleus	GO:0010941 regulation of cell death; GO:0070997 neuron death; GO:0033194 response to hydroperoxide; GO:0043523 regulation of neuron apoptotic process; GO:0044699 single-organism process; GO:0031400 negative regulation of protein modification process; GO:0007610 behavior; GO:0008152 metabolic process; GO:1903204 negative regulation of oxidative stress-induced neuron death; GO:0006915 apoptotic pro…	GO:0043229 intracellular organelle; GO:0043232 intracellular non-membrane-bounded organelle; GO:0005737 cytoplasm; GO:0044446 intracellular organelle part; GO:0031981 nuclear lumen; GO:0044424 intracellular part; GO:0005730 nucleolus; GO:0005623 cell; GO:0005739 mitochondrion; GO:0044422 organelle part; GO:0043228 non-membrane-bounded organelle; GO:0043226 organelle; GO:0043231 intracellular memb…	GO:0003824 catalytic activity; GO:0016491 oxidoreductase activity;				IPR018392; IPR006571;	LysM domain; TLDc domain;
A0A0G2K7Y2	201	1.345	Up	0.0027993	S	Oxidation resistance protein 1 OS=Rattus norvegicus OX=10116 GN=Oxr1 PE=1 SV=1	Oxr1	0.849919	4.59945e-27	196.86	VVS(0.85)S(0.868)T(0.319)S(0.964)EEEEAFTEK	3	0.4551	4	1.13258	1.10293	1.24195	0.828373	0.850049	0.907587	nucleus	GO:0010941 regulation of cell death; GO:0070997 neuron death; GO:0033194 response to hydroperoxide; GO:0043523 regulation of neuron apoptotic process; GO:0044699 single-organism process; GO:0031400 negative regulation of protein modification process; GO:0007610 behavior; GO:0008152 metabolic process; GO:1903204 negative regulation of oxidative stress-induced neuron death; GO:0006915 apoptotic pro…	GO:0043229 intracellular organelle; GO:0043232 intracellular non-membrane-bounded organelle; GO:0005737 cytoplasm; GO:0044446 intracellular organelle part; GO:0031981 nuclear lumen; GO:0044424 intracellular part; GO:0005730 nucleolus; GO:0005623 cell; GO:0005739 mitochondrion; GO:0044422 organelle part; GO:0043228 non-membrane-bounded organelle; GO:0043226 organelle; GO:0043231 intracellular memb…	GO:0003824 catalytic activity; GO:0016491 oxidoreductase activity;				IPR018392; IPR006571;	LysM domain; TLDc domain;
A0A0G2K7Y2	90	0.758	Down	0.0066957	S	Oxidation resistance protein 1 OS=Rattus norvegicus OX=10116 GN=Oxr1 PE=1 SV=1	Oxr1	1	0.000323634	113.69	RMS(1)FQKPK	4	-0.77975	3	0.861254	0.797175	0.919003	1.07837	1.21032	1.11089	nucleus	GO:0010941 regulation of cell death; GO:0070997 neuron death; GO:0033194 response to hydroperoxide; GO:0043523 regulation of neuron apoptotic process; GO:0044699 single-organism process; GO:0031400 negative regulation of protein modification process; GO:0007610 behavior; GO:0008152 metabolic process; GO:1903204 negative regulation of oxidative stress-induced neuron death; GO:0006915 apoptotic pro…	GO:0043229 intracellular organelle; GO:0043232 intracellular non-membrane-bounded organelle; GO:0005737 cytoplasm; GO:0044446 intracellular organelle part; GO:0031981 nuclear lumen; GO:0044424 intracellular part; GO:0005730 nucleolus; GO:0005623 cell; GO:0005739 mitochondrion; GO:0044422 organelle part; GO:0043228 non-membrane-bounded organelle; GO:0043226 organelle; GO:0043231 intracellular memb…	GO:0003824 catalytic activity; GO:0016491 oxidoreductase activity;				IPR018392; IPR006571;	LysM domain; TLDc domain;
D3ZF86	387	0.774	Down	0.00144326	S	ARFGEF family member 3 OS=Rattus norvegicus OX=10116 GN=Arfgef3 PE=1 SV=3	Arfgef3	0.999778	3.81052e-65	247.58	SDVSDIGSDNCS(1)LADEEQTPR	2	1.1326	3	0.863502	0.840886	0.903448	1.17982	1.10562	1.08557	cytoplasm,plasma membrane	GO:0050794 regulation of cellular process; GO:0023051 regulation of signaling; GO:0046578 regulation of Ras protein signal transduction; GO:0031324 negative regulation of cellular metabolic process; GO:0048519 negative regulation of biological process; GO:0048523 negative regulation of cellular process; GO:0010923 negative regulation of phosphatase activity; GO:0051346 negative regulation of hydr…		GO:0098772 molecular function regulator; GO:0005086 ARF guanyl-nucleotide exchange factor activity; GO:0005085 guanyl-nucleotide exchange factor activity; GO:0005488 binding;	K17572	ARFGEF3, KEPI; brefeldin A-inhibited guanine nucleotide-exchange protein 3		IPR000904; IPR016024; IPR015403;	Sec7 domain; Armadillo-type fold; Sec7, C-terminal;
D3ZF86	410	0.79	Down	0.042375	S	ARFGEF family member 3 OS=Rattus norvegicus OX=10116 GN=Arfgef3 PE=1 SV=3	Arfgef3	0.99977	0.012481	61.161	TAALS(1)LK	2	0.30648	1	0.841741	0.844914	0.944828	0.967033	1.22093	1.1433	cytoplasm,plasma membrane	GO:0050794 regulation of cellular process; GO:0023051 regulation of signaling; GO:0046578 regulation of Ras protein signal transduction; GO:0031324 negative regulation of cellular metabolic process; GO:0048519 negative regulation of biological process; GO:0048523 negative regulation of cellular process; GO:0010923 negative regulation of phosphatase activity; GO:0051346 negative regulation of hydr…		GO:0098772 molecular function regulator; GO:0005086 ARF guanyl-nucleotide exchange factor activity; GO:0005085 guanyl-nucleotide exchange factor activity; GO:0005488 binding;	K17572	ARFGEF3, KEPI; brefeldin A-inhibited guanine nucleotide-exchange protein 3		IPR000904; IPR016024; IPR015403;	Sec7 domain; Armadillo-type fold; Sec7, C-terminal;
D3ZF86	1829	0.616	Down	0.001498	S	ARFGEF family member 3 OS=Rattus norvegicus OX=10116 GN=Arfgef3 PE=1 SV=3	Arfgef3	0.999957	8.24244e-10	153.15	HSFS(1)AGPELLR	3	-0.29757	2	0.700297	0.770393	0.802956	1.34266	1.20543	1.14227	cytoplasm,plasma membrane	GO:0050794 regulation of cellular process; GO:0023051 regulation of signaling; GO:0046578 regulation of Ras protein signal transduction; GO:0031324 negative regulation of cellular metabolic process; GO:0048519 negative regulation of biological process; GO:0048523 negative regulation of cellular process; GO:0010923 negative regulation of phosphatase activity; GO:0051346 negative regulation of hydr…		GO:0098772 molecular function regulator; GO:0005086 ARF guanyl-nucleotide exchange factor activity; GO:0005085 guanyl-nucleotide exchange factor activity; GO:0005488 binding;	K17572	ARFGEF3, KEPI; brefeldin A-inhibited guanine nucleotide-exchange protein 3		IPR000904; IPR016024; IPR015403;	Sec7 domain; Armadillo-type fold; Sec7, C-terminal;
D3ZF86	348	0.814	Down	0.041399	S	ARFGEF family member 3 OS=Rattus norvegicus OX=10116 GN=Arfgef3 PE=1 SV=3	Arfgef3	0.999651	4.81889e-05	87.352	YSESNFS(1)VDDQDLSR	3	-1.1954	1	0.818991	0.871098	0.996059	1.18282	1.08236	1.03402	cytoplasm,plasma membrane	GO:0050794 regulation of cellular process; GO:0023051 regulation of signaling; GO:0046578 regulation of Ras protein signal transduction; GO:0031324 negative regulation of cellular metabolic process; GO:0048519 negative regulation of biological process; GO:0048523 negative regulation of cellular process; GO:0010923 negative regulation of phosphatase activity; GO:0051346 negative regulation of hydr…		GO:0098772 molecular function regulator; GO:0005086 ARF guanyl-nucleotide exchange factor activity; GO:0005085 guanyl-nucleotide exchange factor activity; GO:0005488 binding;	K17572	ARFGEF3, KEPI; brefeldin A-inhibited guanine nucleotide-exchange protein 3		IPR000904; IPR016024; IPR015403;	Sec7 domain; Armadillo-type fold; Sec7, C-terminal;
F1M801	688	1.206	Up	0.0042782	S	Anaphase promoting complex subunit 1 (Predicted) OS=Rattus norvegicus OX=10116 GN=Anapc1 PE=1 SV=2	Anapc1	0.999587	3.18897e-12	140.22	SFDFEGSLS(1)PVIAPK	3	-1.141	2	1.04921	1.13448	1.09524	0.880597	0.947528	0.890977	plasma membrane	GO:0016567 protein ubiquitination; GO:0044267 cellular protein metabolic process; GO:0070647 protein modification by small protein conjugation or removal; GO:0044238 primary metabolic process; GO:0044237 cellular metabolic process; GO:0000209 protein polyubiquitination; GO:0071704 organic substance metabolic process; GO:0008152 metabolic process; GO:0032446 protein modification by small protein c…	GO:0043229 intracellular organelle; GO:0044446 intracellular organelle part; GO:0031461 cullin-RING ubiquitin ligase complex; GO:0032991 macromolecular complex; GO:0044424 intracellular part; GO:1990234 transferase complex; GO:0005623 cell; GO:0044422 organelle part; GO:0043231 intracellular membrane-bounded organelle; GO:0043226 organelle; GO:0000152 nuclear ubiquitin ligase complex; GO:1902494 …		K03348	APC1; anaphase-promoting complex subunit 1	rno04110 Cell cycle - Rattus norvegicus (rat); rno04114 Oocyte meiosis - Rattus norvegicus (rat); rno04120 Ubiquitin mediated proteolysis - Rattus norvegicus (rat); rno04914 Progesterone-mediated oocyte maturation - Rattus norvegicus (rat); rno05166 Human T-cell leukemia virus 1 infection - Rattus norvegicus (rat);
D3ZIX4	130	1.301	Up	0.0166383	S	H1 histone family, member X OS=Rattus norvegicus OX=10116 GN=H1fx PE=1 SV=1	H1fx	0.989617	0.00338498	59.728	RGAS(0.99)AAS(0.01)S(0.001)PAPK	3	1.7128	1	1.22243	1.14595	1.01518	0.857422	0.927606	0.816384	nucleus	GO:0044085 cellular component biogenesis; GO:0016043 cellular component organization; GO:0034728 nucleosome organization; GO:0034622 cellular macromolecular complex assembly; GO:0006333 chromatin assembly or disassembly; GO:0043933 macromolecular complex subunit organization; GO:0065004 protein-DNA complex assembly; GO:0006323 DNA packaging; GO:0006334 nucleosome assembly; GO:0051276 chromosome o…	GO:0043229 intracellular organelle; GO:0043232 intracellular non-membrane-bounded organelle; GO:0044446 intracellular organelle part; GO:0032991 macromolecular complex; GO:0031981 nuclear lumen; GO:0044424 intracellular part; GO:0005730 nucleolus; GO:0005623 cell; GO:0044422 organelle part; GO:0044427 chromosomal part; GO:0000786 nucleosome; GO:0043228 non-membrane-bounded organelle; GO:0043231 i…	GO:0097159 organic cyclic compound binding; GO:1901363 heterocyclic compound binding; GO:0050839 cell adhesion molecule binding; GO:0003677 DNA binding; GO:0003723 RNA binding; GO:0005488 binding; GO:0045296 cadherin binding; GO:0003676 nucleic acid binding; GO:0005515 protein binding;	K11275	H1_5; histone H1/5		IPR011991; IPR005818;	Winged helix-turn-helix DNA-binding domain; Linker histone H1/H5, domain H15;
Q5BK16	176	1.436	Up	0.0167419	S	RCG26064 OS=Rattus norvegicus OX=10116 GN=Trex1 PE=1 SV=1	Trex1	0.98413	0.00248159	61.265	KS(0.984)Y(0.001)S(0.015)LGSIYTR	3	-0.46868	1	1.31202	1.13315	1.14594	0.831579	0.833795	0.83559	extracellular	GO:0008152 metabolic process; GO:0006725 cellular aromatic compound metabolic process; GO:0090304 nucleic acid metabolic process; GO:0046483 heterocycle metabolic process; GO:0006139 nucleobase-containing compound metabolic process; GO:1901360 organic cyclic compound metabolic process; GO:0006807 nitrogen compound metabolic process; GO:0034641 cellular nitrogen compound metabolic process; GO:0043…	GO:0031224 intrinsic component of membrane; GO:0016020 membrane; GO:0016021 integral component of membrane; GO:0044425 membrane part;	GO:0044877 macromolecular complex binding; GO:0032405 MutLalpha complex binding; GO:0008408 3'-5' exonuclease activity; GO:0016787 hydrolase activity; GO:0005515 protein binding; GO:0032404 mismatch repair complex binding; GO:1901363 heterocyclic compound binding; GO:0097159 organic cyclic compound binding; GO:0032407 MutSalpha complex binding; GO:0003824 catalytic activity; GO:0005488 binding; G…	K10790	TREX1; three prime repair exonuclease 1 [EC:3.1.11.2]	rno04623 Cytosolic DNA-sensing pathway - Rattus norvegicus (rat);	IPR012337; IPR013520;	Ribonuclease H-like domain; Exonuclease, RNase T/DNA polymerase III;
F1M4A0	1399	0.747	Down	0.0173398	S	Tight junction protein 1 (Predicted) OS=Rattus norvegicus OX=10116 GN=Tjp1 PE=1 SV=2	Tjp1	0.989039	5.10148e-05	85.737	GKPETDAMDRS(0.989)FS(0.011)EK	4	-2.4583	3	0.846077	0.811417	0.903904	1.06377	1.29909	1.06467	cytoplasm,nucleus	GO:0065008 regulation of biological quality; GO:0071331 cellular response to hexose stimulus; GO:0009746 response to hexose; GO:0009628 response to abiotic stimulus; GO:0042593 glucose homeostasis; GO:0071310 cellular response to organic substance; GO:0045471 response to ethanol; GO:1901700 response to oxygen-containing compound; GO:0044699 single-organism process; GO:0003018 vascular process in …	GO:0070160 occluding junction; GO:0030054 cell junction; GO:0044464 cell part; GO:0005622 intracellular; GO:0005737 cytoplasm; GO:0044424 intracellular part; GO:0005623 cell; GO:0005911 cell-cell junction; GO:0005923 bicellular tight junction; GO:0043296 apical junction complex;	GO:0008022 protein C-terminus binding; GO:0005515 protein binding; GO:0005488 binding;	K05701	TJP1, ZO1; tight junction protein 1	rno04520 Adherens junction - Rattus norvegicus (rat); rno04530 Tight junction - Rattus norvegicus (rat); rno04540 Gap junction - Rattus norvegicus (rat); rno05132 Salmonella infection - Rattus norvegicus (rat);	IPR011511; IPR001452; IPR000906; IPR008144; IPR027417; IPR001478; IPR008145;	Variant SH3 domain; SH3 domain; ZU5 domain; Guanylate kinase-like domain; P-loop containing nucleoside triphosphate hydrolase; PDZ domain; Guanylate kinase/L-type calcium channel beta subunit;
Q63475	671	1.537	Up	0.0044191	S	Receptor-type tyrosine-protein phosphatase N2 OS=Rattus norvegicus OX=10116 GN=Ptprn2 PE=1 SV=1	Ptprn2	0.99985	0.000767527	63.869	MAVRPQDHS(1)EGPHTSR	4	0.53807	1	1.0963	1.35144	1.23975	0.734226	0.831094	0.834566	extracellular,plasma membrane	GO:0044700 single organism signaling; GO:0001505 regulation of neurotransmitter levels; GO:0009914 hormone transport; GO:0071331 cellular response to hexose stimulus; GO:0065008 regulation of biological quality; GO:0009746 response to hexose; GO:0042593 glucose homeostasis; GO:0007269 neurotransmitter secretion; GO:0044699 single-organism process; GO:0009749 response to glucose; GO:0044237 cellul…	GO:0030658 transport vesicle membrane; GO:0016020 membrane; GO:0005783 endoplasmic reticulum; GO:0031090 organelle membrane; GO:0031410 cytoplasmic vesicle; GO:0030054 cell junction; GO:0031982 vesicle; GO:0005737 cytoplasm; GO:0044433 cytoplasmic vesicle part; GO:0031224 intrinsic component of membrane; GO:0032991 macromolecular complex; GO:0044424 intracellular part; GO:0099501 exocytic vesicle…	GO:0004725 protein tyrosine phosphatase activity; GO:0003824 catalytic activity; GO:0042578 phosphoric ester hydrolase activity; GO:0005488 binding; GO:0016791 phosphatase activity; GO:0016788 hydrolase activity, acting on ester bonds; GO:0016787 hydrolase activity; GO:0005515 protein binding; GO:0004721 phosphoprotein phosphatase activity;	K07817	PTPRN; receptor-type tyrosine-protein phosphatase N [EC:3.1.3.48]	rno04940 Type I diabetes mellitus - Rattus norvegicus (rat);	IPR029021; IPR000387; IPR003595; IPR000242; IPR021613; IPR029403;	Protein-tyrosine phosphatase-like; Tyrosine specific protein phosphatases domain; Protein-tyrosine phosphatase, catalytic; PTP type protein phosphatase; Protein-tyrosine phosphatase receptor IA-2 ectodomain; RESP18 domain;
G3V8K7	694	0.645	Down	0.0183227	Y	Signal transducer and activator of transcription OS=Rattus norvegicus OX=10116 GN=Stat5a PE=1 SV=1	Stat5a	1	0.00732834	55.261	AVDGY(1)VKPQIK	3	-0.19344	1	0.707734	0.839104	0.838983	1.43721	1.23743	1.0271	cytoplasm	GO:0044700 single organism signaling; GO:0030335 positive regulation of cell migration; GO:0040017 positive regulation of locomotion; GO:0097659 nucleic acid-templated transcription; GO:0044699 single-organism process; GO:0009058 biosynthetic process; GO:0044237 cellular metabolic process; GO:0010594 regulation of endothelial cell migration; GO:2001141 regulation of RNA biosynthetic process; GO:0…	GO:0043229 intracellular organelle; GO:0005737 cytoplasm; GO:0044446 intracellular organelle part; GO:0031981 nuclear lumen; GO:0044424 intracellular part; GO:0005829 cytosol; GO:0005623 cell; GO:0044422 organelle part; GO:0043226 organelle; GO:0043231 intracellular membrane-bounded organelle; GO:0031974 membrane-enclosed lumen; GO:0005654 nucleoplasm; GO:0005634 nucleus; GO:0070013 intracellular…	GO:0097159 organic cyclic compound binding; GO:1901363 heterocyclic compound binding; GO:0003677 DNA binding; GO:0005488 binding; GO:0001071 nucleic acid binding transcription factor activity; GO:0003676 nucleic acid binding; GO:0004871 signal transducer activity; GO:0003700 transcription factor activity, sequence-specific DNA binding;	K11223	STAT5A; signal transducer and activator of transcription 5A	rno04012 ErbB signaling pathway - Rattus norvegicus (rat); rno04217 Necroptosis - Rattus norvegicus (rat); rno04630 JAK-STAT signaling pathway - Rattus norvegicus (rat); rno04658 Th1 and Th2 cell differentiation - Rattus norvegicus (rat); rno04659 Th17 cell differentiation - Rattus norvegicus (rat); rno04917 Prolactin signaling pathway - Rattus norvegicus (rat); rno04933 AGE-RAGE signaling pathwa…	IPR013801; IPR008967; IPR011992; IPR013800; IPR000980; IPR012345; IPR013799; IPR015988;	STAT transcription factor, DNA-binding; p53-like transcription factor, DNA-binding; EF-hand domain pair; STAT transcription factor, all-alpha domain; SH2 domain; STAT transcription factor, DNA-binding, subdomain; STAT transcription factor, protein interaction; STAT transcription factor, coiled coil;
Q5PQN1	830	1.331	Up	0.002241	S	Probable E3 ubiquitin-protein ligase HERC4 OS=Rattus norvegicus OX=10116 GN=Herc4 PE=2 SV=1	Herc4	1	6.9035e-05	115.57	RKPS(1)LDDLK	4	0.41723	5	1.08435	1.23586	1.11059	0.849359	0.858707	0.870332	nucleus	GO:0000003 reproduction; GO:0022414 reproductive process; GO:0048869 cellular developmental process; GO:0044267 cellular protein metabolic process; GO:0044699 single-organism process; GO:0044237 cellular metabolic process; GO:0071704 organic substance metabolic process; GO:0030154 cell differentiation; GO:0008152 metabolic process; GO:0044702 single organism reproductive process; GO:0043170 macro…	GO:0043229 intracellular organelle; GO:0043232 intracellular non-membrane-bounded organelle; GO:0044446 intracellular organelle part; GO:0005737 cytoplasm; GO:0031981 nuclear lumen; GO:0044452 nucleolar part; GO:0044424 intracellular part; GO:0005730 nucleolus; GO:0005829 cytosol; GO:0005623 cell; GO:0001650 fibrillar center; GO:0044422 organelle part; GO:0043228 non-membrane-bounded organelle; G…	GO:0019787 ubiquitin-like protein transferase activity; GO:0016740 transferase activity; GO:0003824 catalytic activity; GO:0004842 ubiquitin-protein transferase activity;	K10615	HERC4; E3 ubiquitin-protein ligase HERC4 [EC:2.3.2.26]	rno04120 Ubiquitin mediated proteolysis - Rattus norvegicus (rat);	IPR009091; IPR000569;	Regulator of chromosome condensation 1/beta-lactamase-inhibitor protein II; HECT domain;
F1M9F9	26	1.329	Up	0.0018963	S	Jouberin OS=Rattus norvegicus OX=10116 GN=Ahi1 PE=1 SV=2	Ahi1	0.999863	0.000106556	86.367	SQPADDS(1)EDSREK	3	0.89175	1	1.18916	1.08827	1.16983	0.89126	0.816557	0.885102	nucleus		GO:0043229 intracellular organelle; GO:0005929 cilium; GO:0042995 cell projection; GO:0043232 intracellular non-membrane-bounded organelle; GO:0030054 cell junction; GO:0044430 cytoskeletal part; GO:0044446 intracellular organelle part; GO:0070161 anchoring junction; GO:0036064 ciliary basal body; GO:0044424 intracellular part; GO:0005911 cell-cell junction; GO:0005623 cell; GO:0044463 cell proje…	GO:0005515 protein binding; GO:0042802 identical protein binding; GO:0005488 binding;	K16740	AHI1; jouberin		IPR001452; IPR017986; IPR015943;	SH3 domain; WD40-repeat-containing domain; WD40/YVTN repeat-like-containing domain;
F1M9F9	112	0.78	Down	0.0149216	S	Jouberin OS=Rattus norvegicus OX=10116 GN=Ahi1 PE=1 SV=2	Ahi1	0.999998	1.10937e-34	177.39	KVPVPAKPETSPSDVCDS(1)AAEGEQK	4	-0.36639	1	0.842536	0.905504	0.865135	1.20935	1.14111	1	nucleus		GO:0043229 intracellular organelle; GO:0005929 cilium; GO:0042995 cell projection; GO:0043232 intracellular non-membrane-bounded organelle; GO:0030054 cell junction; GO:0044430 cytoskeletal part; GO:0044446 intracellular organelle part; GO:0070161 anchoring junction; GO:0036064 ciliary basal body; GO:0044424 intracellular part; GO:0005911 cell-cell junction; GO:0005623 cell; GO:0044463 cell proje…	GO:0005515 protein binding; GO:0042802 identical protein binding; GO:0005488 binding;	K16740	AHI1; jouberin		IPR001452; IPR017986; IPR015943;	SH3 domain; WD40-repeat-containing domain; WD40/YVTN repeat-like-containing domain;
P14925	949	1.956	Up	0.037879	S	Peptidylglycine alpha-amidating monooxygenase OS=Rattus norvegicus OX=10116 GN=Pam PE=1 SV=1	Pam	0.995486	6.3232e-156	334.23	VS(0.001)T(0.004)EGS(0.995)DQEKDEDDGTES(1)EEEYSAPLPK	3	0.59157	8	1.09927	1.20361	1.80063	0.935754	0.601209	0.56137	plasma membrane	GO:0044085 cellular component biogenesis; GO:0065008 regulation of biological quality; GO:0048732 gland development; GO:0006518 peptide metabolic process; GO:0022414 reproductive process; GO:0044255 cellular lipid metabolic process; GO:0044237 cellular metabolic process; GO:0008152 metabolic process; GO:0007507 heart development; GO:0032879 regulation of localization; GO:0065003 macromolecular co…	GO:0030658 transport vesicle membrane; GO:0016020 membrane; GO:0005615 extracellular space; GO:0044421 extracellular region part; GO:0031090 organelle membrane; GO:0031410 cytoplasmic vesicle; GO:0071944 cell periphery; GO:0031982 vesicle; GO:0005737 cytoplasm; GO:0043025 neuronal cell body; GO:0044433 cytoplasmic vesicle part; GO:0031224 intrinsic component of membrane; GO:0044424 intracellular …	GO:0019842 vitamin binding; GO:0031418 L-ascorbic acid binding; GO:0043167 ion binding; GO:0019901 protein kinase binding; GO:0043177 organic acid binding; GO:0016829 lyase activity; GO:0016705 oxidoreductase activity, acting on paired donors, with incorporation or reduction of molecular oxygen; GO:0016842 amidine-lyase activity; GO:0005515 protein binding; GO:0048029 monosaccharide binding; GO:0…	K18200	PAL; peptidylamidoglycolate lyase [EC:4.3.2.5]		IPR008977; IPR014784; IPR000323; IPR024548; IPR011042;	PHM/PNGase F domain; Copper type II, ascorbate-dependent monooxygenase-like, C-terminal; Copper type II, ascorbate-dependent monooxygenase, N-terminal; Copper type II ascorbate-dependent monooxygenase, C-terminal; Six-bladed beta-propeller, TolB-like;
D3ZV96	12	0.829	Down	0.024417	S	Uncharacterized protein OS=Rattus norvegicus OX=10116 GN=Fam84b PE=1 SV=1	Fam84b	0.996087	0.00324945	75.652	LTHLS(0.996)Y(0.004)K	3	-0.29187	1	0.94421	0.884103	0.881339	1.18466	1.0766	1.00549	nucleus		GO:0016020 membrane; GO:0005622 intracellular; GO:0044464 cell part; GO:0071944 cell periphery; GO:0005737 cytoplasm; GO:0044424 intracellular part; GO:0005623 cell; GO:0005886 plasma membrane;					IPR007053;	LRAT-like domain;
Q63803	1102	1.422	Up	0.00188354	S	Guanine nucleotide-binding protein G(s) subunit alpha isoforms XLas OS=Rattus norvegicus OX=10116 GN=Gnas PE=1 SV=3	Gnas	0.999675	7.40673e-05	125.24	ISTAS(1)GDGR	2	0.75101	1	1.27059	1.11706	1.143	0.786157	0.833002	0.86376	cytoplasm	GO:0044700 single organism signaling; GO:0065008 regulation of biological quality; GO:0032270 positive regulation of cellular protein metabolic process; GO:0035813 regulation of renal sodium excretion; GO:0009891 positive regulation of biosynthetic process; GO:0044699 single-organism process; GO:0051046 regulation of secretion; GO:0051241 negative regulation of multicellular organismal process; G…	GO:0016020 membrane; GO:0016324 apical plasma membrane; GO:0031410 cytoplasmic vesicle; GO:0019898 extrinsic component of membrane; GO:0098857 membrane microdomain; GO:0098796 membrane protein complex; GO:0071944 cell periphery; GO:0005737 cytoplasm; GO:0031982 vesicle; GO:0043025 neuronal cell body; GO:0032991 macromolecular complex; GO:0044424 intracellular part; GO:0031234 extrinsic component …	GO:0051429 corticotropin-releasing hormone receptor binding; GO:1901265 nucleoside phosphate binding; GO:0005102 receptor binding; GO:0031683 G-protein beta/gamma-subunit complex binding; GO:0016817 hydrolase activity, acting on acid anhydrides; GO:0016787 hydrolase activity; GO:0005515 protein binding; GO:0031698 beta-2 adrenergic receptor binding; GO:0051427 hormone receptor binding; GO:0043014…	K04633	GNAL; guanine nucleotide-binding protein G(olf) subunit alpha	rno04020 Calcium signaling pathway - Rattus norvegicus (rat); rno04728 Dopaminergic synapse - Rattus norvegicus (rat); rno04740 Olfactory transduction - Rattus norvegicus (rat); rno05012 Parkinson disease - Rattus norvegicus (rat); rno05142 Chagas disease (American trypanosomiasis) - Rattus norvegicus (rat); rno05146 Amoebiasis - Rattus norvegicus (rat);	IPR027417; IPR011025;	P-loop containing nucleoside triphosphate hydrolase; G protein alpha subunit, helical insertion;
O88989	241	1.471	Up	0.0020998	S	Malate dehydrogenase, cytoplasmic OS=Rattus norvegicus OX=10116 GN=Mdh1 PE=1 SV=3	Mdh1	0.937024	4.4347e-05	119.45	KLS(0.937)S(0.063)AMSAAK	3	-0.29908	6	1.08283	1.2931	1.23589	0.823824	0.82874	0.803229	cytoplasm	GO:0043648 dicarboxylic acid metabolic process; GO:0019362 pyridine nucleotide metabolic process; GO:0006725 cellular aromatic compound metabolic process; GO:0046496 nicotinamide nucleotide metabolic process; GO:0006734 NADH metabolic process; GO:0009117 nucleotide metabolic process; GO:0044699 single-organism process; GO:0044237 cellular metabolic process; GO:0072524 pyridine-containing compound…	GO:0043229 intracellular organelle; GO:0005615 extracellular space; GO:0044421 extracellular region part; GO:0031982 vesicle; GO:0005737 cytoplasm; GO:0044424 intracellular part; GO:0005829 cytosol; GO:0005623 cell; GO:0005576 extracellular region; GO:0005739 mitochondrion; GO:0043231 intracellular membrane-bounded organelle; GO:0043226 organelle; GO:0070062 extracellular exosome; GO:0043209 myel…	GO:0097159 organic cyclic compound binding; GO:1901363 heterocyclic compound binding; GO:0016614 oxidoreductase activity, acting on CH-OH group of donors; GO:0016616 oxidoreductase activity, acting on the CH-OH group of donors, NAD or NADP as acceptor; GO:1901265 nucleoside phosphate binding; GO:0051287 NAD binding; GO:0003824 catalytic activity; GO:0005488 binding; GO:0016615 malate dehydrogenas…	K00025	MDH1; malate dehydrogenase [EC:1.1.1.37]	rno00020 Citrate cycle (TCA cycle) - Rattus norvegicus (rat); rno00270 Cysteine and methionine metabolism - Rattus norvegicus (rat); rno00620 Pyruvate metabolism - Rattus norvegicus (rat); rno00630 Glyoxylate and dicarboxylate metabolism - Rattus norvegicus (rat); rno01100 Metabolic pathways - Rattus norvegicus (rat); rno01200 Carbon metabolism - Rattus norvegicus (rat); rno04964 Proximal tubule …	IPR022383; IPR016040; IPR001236; IPR015955;	Lactate/malate dehydrogenase, C-terminal; NAD(P)-binding domain; Lactate/malate dehydrogenase, N-terminal; Lactate dehydrogenase/glycoside hydrolase, family 4, C-terminal;
O88989	242	1.527	Up	0.00096463	S	Malate dehydrogenase, cytoplasmic OS=Rattus norvegicus OX=10116 GN=Mdh1 PE=1 SV=3	Mdh1	0.906745	7.90019e-07	148.62	KLS(0.092)S(0.907)AMS(0.002)AAK	3	1.2453	5	1.13131	1.26775	1.27319	0.814815	0.833661	0.755802	cytoplasm	GO:0043648 dicarboxylic acid metabolic process; GO:0019362 pyridine nucleotide metabolic process; GO:0006725 cellular aromatic compound metabolic process; GO:0046496 nicotinamide nucleotide metabolic process; GO:0006734 NADH metabolic process; GO:0009117 nucleotide metabolic process; GO:0044699 single-organism process; GO:0044237 cellular metabolic process; GO:0072524 pyridine-containing compound…	GO:0043229 intracellular organelle; GO:0005615 extracellular space; GO:0044421 extracellular region part; GO:0031982 vesicle; GO:0005737 cytoplasm; GO:0044424 intracellular part; GO:0005829 cytosol; GO:0005623 cell; GO:0005576 extracellular region; GO:0005739 mitochondrion; GO:0043231 intracellular membrane-bounded organelle; GO:0043226 organelle; GO:0070062 extracellular exosome; GO:0043209 myel…	GO:0097159 organic cyclic compound binding; GO:1901363 heterocyclic compound binding; GO:0016614 oxidoreductase activity, acting on CH-OH group of donors; GO:0016616 oxidoreductase activity, acting on the CH-OH group of donors, NAD or NADP as acceptor; GO:1901265 nucleoside phosphate binding; GO:0051287 NAD binding; GO:0003824 catalytic activity; GO:0005488 binding; GO:0016615 malate dehydrogenas…	K00025	MDH1; malate dehydrogenase [EC:1.1.1.37]	rno00020 Citrate cycle (TCA cycle) - Rattus norvegicus (rat); rno00270 Cysteine and methionine metabolism - Rattus norvegicus (rat); rno00620 Pyruvate metabolism - Rattus norvegicus (rat); rno00630 Glyoxylate and dicarboxylate metabolism - Rattus norvegicus (rat); rno01100 Metabolic pathways - Rattus norvegicus (rat); rno01200 Carbon metabolism - Rattus norvegicus (rat); rno04964 Proximal tubule …	IPR022383; IPR016040; IPR001236; IPR015955;	Lactate/malate dehydrogenase, C-terminal; NAD(P)-binding domain; Lactate/malate dehydrogenase, N-terminal; Lactate dehydrogenase/glycoside hydrolase, family 4, C-terminal;
D3ZHL6	335	0.803	Down	0.024623	S	Mitogen-activated protein kinase kinase kinase kinase OS=Rattus norvegicus OX=10116 GN=Map4k5 PE=1 SV=2	Map4k5	0.852287	0.00133181	71.085	T(0.148)AS(0.852)EINFDK	3	0.15945	1	0.942214	0.877466	0.87334	1.24776	1.04688	1.05934	cytoplasm	GO:0044700 single organism signaling; GO:0032270 positive regulation of cellular protein metabolic process; GO:0023051 regulation of signaling; GO:1902533 positive regulation of intracellular signal transduction; GO:0000185 activation of MAPKKK activity; GO:0044699 single-organism process; GO:0044237 cellular metabolic process; GO:0006796 phosphate-containing compound metabolic process; GO:007190…	GO:0044424 intracellular part; GO:0005623 cell; GO:0044464 cell part; GO:0005622 intracellular; GO:0005737 cytoplasm;	GO:1901265 nucleoside phosphate binding; GO:0016773 phosphotransferase activity, alcohol group as acceptor; GO:0004672 protein kinase activity; GO:0004702 signal transducer, downstream of receptor, with serine/threonine kinase activity; GO:0004871 signal transducer activity; GO:1901363 heterocyclic compound binding; GO:0097159 organic cyclic compound binding; GO:0016301 kinase activity; GO:003255…	K08833	MAP4K5, KHS1; mitogen-activated protein kinase kinase kinase kinase 5 [EC:2.7.11.1]		IPR000719; IPR001180; IPR011009;	Protein kinase domain; Citron homology (CNH) domain; Protein kinase-like domain;
D3ZHL6	400	1.445	Up	0.020998	S	Mitogen-activated protein kinase kinase kinase kinase OS=Rattus norvegicus OX=10116 GN=Map4k5 PE=1 SV=2	Map4k5	0.999393	8.79902e-10	123	INS(0.999)YPEES(0.001)LPDEEK	3	-0.073391	1	1	1.23572	1.36568	0.781095	0.833333	0.877432	cytoplasm	GO:0044700 single organism signaling; GO:0032270 positive regulation of cellular protein metabolic process; GO:0023051 regulation of signaling; GO:1902533 positive regulation of intracellular signal transduction; GO:0000185 activation of MAPKKK activity; GO:0044699 single-organism process; GO:0044237 cellular metabolic process; GO:0006796 phosphate-containing compound metabolic process; GO:007190…	GO:0044424 intracellular part; GO:0005623 cell; GO:0044464 cell part; GO:0005622 intracellular; GO:0005737 cytoplasm;	GO:1901265 nucleoside phosphate binding; GO:0016773 phosphotransferase activity, alcohol group as acceptor; GO:0004672 protein kinase activity; GO:0004702 signal transducer, downstream of receptor, with serine/threonine kinase activity; GO:0004871 signal transducer activity; GO:1901363 heterocyclic compound binding; GO:0097159 organic cyclic compound binding; GO:0016301 kinase activity; GO:003255…	K08833	MAP4K5, KHS1; mitogen-activated protein kinase kinase kinase kinase 5 [EC:2.7.11.1]		IPR000719; IPR001180; IPR011009;	Protein kinase domain; Citron homology (CNH) domain; Protein kinase-like domain;
Q5BJP5	24	0.793	Down	0.0115792	S	Transmembrane protein 230 OS=Rattus norvegicus OX=10116 GN=Tmem230 PE=1 SV=1	Tmem230	0.906769	6.79659e-65	267.95	LSS(0.907)T(0.093)DDGYIDLQFK	2	-0.91141	2	0.886476	0.804971	0.962551	1.1254	1.13431	1.08821	plasma membrane	GO:0051640 organelle localization; GO:0051650 establishment of vesicle localization; GO:0046907 intracellular transport; GO:0048489 synaptic vesicle transport; GO:0016192 vesicle-mediated transport; GO:0044699 single-organism process; GO:0051656 establishment of organelle localization; GO:1902582 single-organism intracellular transport; GO:0097480 establishment of synaptic vesicle localization; G…	GO:0016020 membrane; GO:0031410 cytoplasmic vesicle; GO:0030054 cell junction; GO:0005737 cytoplasm; GO:0031982 vesicle; GO:0031224 intrinsic component of membrane; GO:0044424 intracellular part; GO:0005623 cell; GO:0044422 organelle part; GO:0005776 autophagosome; GO:0005769 early endosome; GO:0055037 recycling endosome; GO:0070382 exocytic vesicle; GO:0008021 synaptic vesicle; GO:0044425 membra…
A0A0G2K2G7	615	0.825	Down	0.0052387	S	Ankyrin repeat and sterile alpha motif domain-containing 1A OS=Rattus norvegicus OX=10116 GN=Anks1a PE=1 SV=1	Anks1a	0.991341	1.59067e-61	260.07	S(0.007)PS(0.991)FAS(0.001)EWDEIEK	2	3.5834	2	0.939664	0.856215	0.913265	1.05488	1.13679	1.09409	nucleus	GO:0050794 regulation of cellular process; GO:0050789 regulation of biological process; GO:0010646 regulation of cell communication; GO:0023051 regulation of signaling; GO:0048583 regulation of response to stimulus; GO:0009966 regulation of signal transduction; GO:0065007 biological regulation; GO:1901187 regulation of ephrin receptor signaling pathway;		GO:0046875 ephrin receptor binding; GO:0005515 protein binding; GO:0005102 receptor binding; GO:0005488 binding;	K21413	ANKS1; ankyrin repeat and SAM domain-containing protein 1		IPR013761; IPR011993; IPR020683; IPR001660; IPR006020;	Sterile alpha motif/pointed domain; PH domain-like; Ankyrin repeat-containing domain; Sterile alpha motif domain; PTB/PI domain;
[truncated: 757 more rows]
