# Supplementary material for: Integrative Proteomics and Phosphoproteomics Analysis of the Rat Adenohypophysis after GnRH Treatment
Source: Int J Mol Sci. 2023 Feb 7;24(4):3339. doi: 10.3390/ijms24043339 (PMC9961725; doi:10.3390/ijms24043339)
Supplement: Supplementary file 1 [file ijms-24-03339-s001.zip › Table S2 Phosphorylation motif analysis.xlsx]

## Sheet: motif-x
	Motif Logo				Motif	Motif Score	Foreground		Background		Fold Increase
							Matches	Size	Matches	Size
					xxxRPx_S_Pxxxxx	43.86	110	12770	402	897119	19.2
					xxxxPx_S_Pxxxxx	32.00	813	12660	6537	896717	8.8
					xxxRxx_S_PxPxxx	48.00	129	11847	422	890180	23.0
					xxxxxx_S_PPxxRx	38.85	53	11718	221	889758	18.2
					xxxxxx_S_PPxxxx	32.00	420	11665	4067	889537	7.9
					xxxRSx_S_Pxxxxx	40.33	108	11245	516	885470	16.5
					xxxxxx_S_PxxxRR	40.34	65	11137	305	884954	16.9
					xxxxxx_S_PxxxxK	32.00	287	11072	2581	884649	8.9
					xxxxxx_S_PxRxxx	32.00	269	10785	2558	882068	8.6
					xxxRRx_S_xxxxxx	32.00	601	10516	4135	879510	12.2
					xxxGxx_S_Pxxxxx	29.46	280	9915	3377	875375	7.3
					xxxRxx_S_Pxxxxx	31.17	174	9635	1814	871998	8.7
					xxxxxx_S_PxKxxx	26.45	161	9461	1953	870184	7.6
					xxxxxx_S_DDExxx	44.20	87	9300	317	868231	25.6
					xxxxxx_S_DEExxx	48.00	109	9213	515	867914	19.9
					xxxxxx_S_PxxxxR	26.19	159	9104	2014	867399	7.5
					xxxRSx_S_xDxxxx	40.49	55	8945	352	865385	15.1
					xxxRSx_S_xxxxxx	32.00	330	8890	5499	865033	5.8
					xxxxxD_S_ExExxx	46.78	91	8560	531	859534	17.2
					Kxxxxx_S_Pxxxxx	25.03	124	8469	1573	859003	8.0
					xxxxxx_S_DxExEx	48.00	78	8345	418	857430	19.2
					xExxxx_S_Pxxxxx	25.41	152	8267	2109	857012	7.5
					xxxxxx_S_EEExxx	47.86	100	8115	900	854903	11.7
					xxxxxx_S_PxxxRx	23.14	119	8015	1754	854003	7.2
					xxxRKx_S_xDxxxx	40.35	40	7896	154	852249	28.0
					xxxxxx_S_xDEExx	42.54	47	7856	347	852095	14.7
					xxxRKx_S_xxxxxx	32.00	227	7809	2732	851748	9.1
					xxxxxx_S_DxEExx	41.21	37	7582	296	849016	14.0
					xxxxxx_S_DEDxxx	44.75	56	7545	334	848720	18.9
					xKxxxx_S_Pxxxxx	22.88	100	7489	1470	848386	7.7
					xxxxxx_S_xDExEx	42.48	34	7389	218	846916	17.9
					xxxxxx_S_DxExxx	32.00	179	7355	2514	846698	8.2
					xxxxxx_S_xExExE	38.01	45	7176	521	844184	10.2
					xxRxxx_S_Pxxxxx	22.80	99	7131	1513	843663	7.7
					xxxxxx_S_xEDxxx	32.00	170	7032	3704	842150	5.5
					xxxRxx_S_xxSxxx	32.00	174	6862	3898	838446	5.5
					xxKxxx_S_Pxxxxx	22.65	84	6688	1282	834548	8.2
					xxxRxx_S_xSExxx	41.31	26	6604	233	833266	14.1
					RxxSxx_S_xExxxx	38.93	28	6578	323	833033	11.0
					xxxxxx_S_xSDxEx	43.37	40	6550	519	832710	9.8
					xRxxxx_S_Pxxxxx	23.28	94	6510	1504	832191	8.0
					xxxxxx_S_xEExxx	32.00	176	6416	5051	830687	4.5
					xxxxxx_S_DDDxxx	45.15	54	6240	265	825636	27.0
					xxxxxR_S_xSPxxx	48.00	52	6186	487	825371	14.2
					xxxxSx_S_xDxxxx	32.00	121	6134	4511	824884	3.6
					xxxxxx_S_PKxxxx	23.71	73	6013	1093	820373	9.1
					xxxxxx_S_xDSxxE	38.94	26	5940	348	819280	10.3
					xRxRxx_S_xxxxxx	32.00	140	5914	2339	818932	8.3
					RxxSxx_S_xxxxxx	32.00	124	5774	5296	816593	3.3
					xxxxxx_S_PRxxxx	22.92	76	5650	1273	811297	8.6
					xxxxxx_S_EDExxx	38.82	28	5574	230	810024	17.7
					xxxKRx_S_xxxxxx	32.00	152	5546	2632	809794	8.4
					xxxRxx_S_xExxxx	32.00	85	5394	1849	807162	6.9
					xxxxxx_S_PTxxxx	22.28	84	5309	1610	805313	7.9
					xxxxxx_S_xSExEx	39.93	35	5225	593	803703	9.1
					xxxxxx_S_xDDExx	39.50	26	5190	157	803110	25.6
					xxxxxx_S_EGExxx	38.61	26	5164	261	802953	15.5
					xxxxxG_S_Pxxxxx	29.21	53	5138	1513	802692	5.5
					xxxxxx_S_xDxxxE	32.00	75	5085	2083	801179	5.7
					xxxxxx_S_PExxxx	28.49	59	5010	1416	799096	6.6
					xxxRxx_S_xDxxxx	32.00	83	4951	1224	797680	10.9
					xxxxxx_S_PSxxxx	32.00	102	4868	2963	796456	5.6
					xxExxx_S_xxEExx	35.12	29	4766	411	793493	11.7
					xxxxxx_S_xESxxx	32.00	99	4737	3848	793082	4.3
					xxxxxx_S_ExExxx	26.74	82	4638	3195	789234	4.4
					xxxxxD_S_DxDxxx	40.78	38	4556	256	786039	25.6
					xxxxxG_S_xDxxxx	27.10	54	4518	2038	785783	4.6
					xxxxRx_S_Pxxxxx	25.48	34	4464	717	783745	8.3
					xxxRxx_S_xPxxxx	32.00	82	4430	2006	783028	7.2
					xxxxxx_S_xExExx	26.76	62	4348	2538	781022	4.4
					xxxxxx_S_PxxxxE	27.51	34	4286	837	778484	7.4
					xxxxxD_S_Dxxxxx	32.00	80	4252	2009	777647	7.3
					xxxxxG_S_xxDxxx	24.24	47	4172	2167	775638	4.0
					xxxxxx_S_xDGxxx	26.14	49	4125	2079	773471	4.4
					xxxxxD_S_xxExxx	25.97	59	4076	2269	771392	4.9
					xxxxRH_S_xxxxxx	26.06	41	4017	1054	769123	7.4
					xxxKxx_S_xDxxxx	29.06	49	3976	1434	768069	6.6
					xxxxxx_S_xxxSPx	32.00	141	3927	6526	766635	4.2
					xxxRxx_S_xxxxEx	25.98	39	3786	1418	760109	5.5
					xxxRxx_S_xxxxxE	28.87	42	3747	1288	758691	6.6
					xxxxSx_S_xxDxxx	29.75	66	3705	3226	757403	4.2
					xxxxxG_S_xxxxxx	16.00	374	3639	48817	754177	1.6
					xxxxRR_S_xxxxxx	23.89	59	3265	2510	705360	5.1
					xxxxxx_S_xExxEx	23.33	43	3206	2321	702850	4.1
					xxxxxx_S_xxxEDx	22.87	48	3163	2877	700529	3.7
					xxxKxx_S_Pxxxxx	26.52	24	3115	528	697652	10.2
					xxxxxx_S_xDExxx	22.34	29	3091	1239	697124	5.3
					Kxxxxx_S_xxDxxx	23.99	37	3062	1656	695885	5.1
					xxRRxx_S_xxxxxx	32.00	46	3025	1315	694229	8.0
					xLxKxx_S_xxxxxx	25.93	66	2979	3807	692914	4.0
					xxxxRx_S_xxxxxx	16.00	267	2913	28562	689107	2.2
					xxxxxx_S_Pxxxxx	16.00	247	2646	12074	660545	5.1
					xxKRxx_S_xxxxxx	23.28	35	2399	991	648471	9.5
					xxxxxE_S_Dxxxxx	25.38	35	2364	1604	647480	6.0
					xxxxxx_S_xxExxx	16.00	217	2329	32413	645876	1.9
					xxxxxD_S_Exxxxx	23.70	41	2112	2513	613463	4.7
					xxxxxx_S_xExxxx	16.00	204	2071	26115	610950	2.3
					xxxxxx_S_xxDxxx	16.00	179	1867	25910	584835	2.2
					xxxRPx_S_xxxxxx	22.53	33	1688	1154	558925	9.5
					xxxRxx_S_xxxxxx	16.00	128	1655	13597	557771	3.2
					xxxDxx_S_xxSxxx	22.31	37	1527	3305	544174	4.0
					xxRxSx_S_xxxxxx	22.51	36	1490	2994	540869	4.4
					xxxxxx_S_xDxxxx	16.00	127	1454	20089	537875	2.3
					xxxKxx_S_xPxxxx	22.09	26	1327	1795	517786	5.7
					xxxxSx_S_xxxxxx	14.11	230	1301	54467	515991	1.7
					xxxSxx_S_xxxxxx	16.00	203	1071	47568	461524	1.8
					xxxKxx_S_xxxxxx	11.54	102	868	23181	413956	2.1
					xxxxxx_S_Exxxxx	7.90	82	766	21538	390775	1.9
					xxxxxx_S_xPxxxx	7.55	93	684	27727	369237	1.8
					Rxxxxx_S_xxxxxx	6.86	61	591	17181	341510	2.1
					xxxRxx_T_PPxxxx	39.82	40	1319	183	574511	95.2
					xxxxxx_T_PPxxxx	32.00	204	1279	2802	574328	32.7
					xxxxPx_T_PKxxxx	38.86	24	1075	184	571526	69.3
					xxxxPx_T_Pxxxxx	32.00	113	1051	3401	571342	18.1
					xxxRxx_T_Pxxxxx	29.43	61	938	1720	567941	21.5
					xxxxxR_T_Pxxxxx	24.33	44	877	1568	566221	18.1
					xxxxxx_T_PTxxxx	24.05	44	833	1779	564653	16.8
					xxxGxx_T_Pxxxxx	23.04	40	789	1876	562874	15.2
					xxxxxx_T_Pxxxxx	16.00	186	749	24491	560998	5.7
					xxxRRx_T_xxxxxx	32.00	44	563	1881	536507	22.3
					xxxxxx_T_DxExxx	32.00	49	519	2093	534626	24.1
					xxxRxx_T_xxxxxx	16.00	89	470	26192	532533	3.9
					xxxxxx_T_EExxxx	21.93	25	381	3758	506341	8.8
					xxxxxx_T_DxDxxx	27.87	25	356	1579	502583	22.4
					xxxxxx_T_SPxxxx	25.31	29	331	3445	501004	12.7
					xxxxxD_T_xxxxxx	8.21	40	302	23588	497559	2.8
					xxxxxx_T_xxxxEx	6.92	41	262	30308	473971	2.4

## Sheet: motif annotation
Protein accession	Position	Amino acid	Motif logo
D3ZU00	116	S	xxxxxx_S_PxxxxR
M0R991	393	S	xxxRxx_S_xExxxx
P60825	138	S	xxxxxG_S_xDxxxx
Q62806	306	S	xxxxxx_S_PKxxxx
Q7TQ84	23	S	xxxxxx_S_xExxxx
A0A0G2K1Q9	451	S	xxxxxx_S_xxExxx
G3V7E6	870	S	xxxxxG_S_xxxxxx
Q8K3X0	262	S	xxxxxx_S_PPxxxx
A0A0G2K242	1166	S	xxxxPx_S_Pxxxxx
D3ZSV8	562	S	xxxRRx_S_xxxxxx
A0A0H2UHL9	142	S	xxxRxx_S_Pxxxxx
F1M4Q5	1223	S	xxxxxx_S_xxExxx
D3ZE26	435	S	xxxxxG_S_xDxxxx
D4ADT3	225	S	xxxRxx_S_Pxxxxx
F1LT94	738	S	xxxxxx_S_PxKxxx
P62997	4	S	xxxxxx_S_xExxxx
F1LQS9	288	S	xxxxxG_S_xxxxxx
Q6AXS3	253	S	xxxxxx_S_EEExxx
A0A0G2JW50	1197	S	xxxRKx_S_xxxxxx
D3ZFS3	366	S	xxxxxx_S_PxxxxR
F1M4J0	1132	S	xxxxxx_S_xDxxxx
F1M4M5	1196	S	xxxxxx_S_xDxxxx
A0A0G2K1E3	1033	S	xxxxxx_S_PExxxx
Q792G6	196	S	xxxxxx_S_EGExxx
Q5BJT0	75	S	xxxxxx_S_PPxxxx
F1LUB7	1079	S	xxxKxx_S_xxxxxx
Q9JID1	457	S	xRxRxx_S_xxxxxx
E9PTE1	1972	S	xxxxxx_S_PxRxxx
D3ZQL7	19	S	xxxxPx_S_Pxxxxx
F1LRM0	829	S	xxxxxx_S_DEExxx
Q9JI66	1034	S	xxxxxD_S_Dxxxxx
F1M801	555	S	xxxxxx_S_PxxxxR
D4A5B3	783	S	xxxxxx_S_xxxEDx
Q80W98	295	S	xxxRSx_S_xxxxxx
A0A0G2K9F2	737	S	xxxxxx_S_xEDxxx
Q66HA8	509	S	xxxxxG_S_xxxxxx
M0R5H1	1914	S	xxxxPx_S_Pxxxxx
A0A0G2JWD6	276	S	xxxxxx_S_DDExxx
A0A0G2K1Q5	1142	S	xxxxxx_S_xExExx
Q5M947	265	S	xxxxxx_S_EGExxx
E9PSN4	379	S	xxxxxx_S_PxRxxx
F1LXU0	343	T	xxxxPx_T_Pxxxxx
E9PSN0	699	S	xxxRRx_S_xxxxxx
D3ZUU2	612	S	xxxxxx_S_PKxxxx
M0R5H1	1482	S	xxxKRx_S_xxxxxx
G3V7E6	1777	S	xxxxxx_S_Exxxxx
Q9R1Q2	326	T	xxxxxx_T_Pxxxxx
D3ZJ50	338	S	xxxxRx_S_xxxxxx
P15205	1201	S	xxxxxx_S_PPxxxx
A0A0U1RRZ5	762	S	xxxRSx_S_xxxxxx
B1WBZ3	44	S	xxxxxx_S_PxRxxx
D4A831	1220	S	xxxxRx_S_xxxxxx
Q9JI66	1069	S	xxxRxx_S_xxxxEx
D3ZBC4	446	T	xxxxxx_T_PPxxxx
Q9JHZ4	237	S	xxxKxx_S_xxxxxx
M0R5H1	371	S	xRxRxx_S_xxxxxx
A0A0G2QC38	243	S	xxxxxx_S_xxExxx
Q4V893	106	S	xxxxxx_S_PPxxxx
A0A0G2JXQ2	611	S	xxxxxx_S_xExxxx
F1LSM3	526	S	xxxGxx_S_Pxxxxx
D3ZH75	88	S	xxxxPx_S_Pxxxxx
Q4KLI1	547	S	xRxxxx_S_Pxxxxx
A0A0G2K2M9	1345	S	xxxxxx_S_PxxxxK
O35244	44	T	xxxRxx_T_Pxxxxx
D4A022	596	S	xxxSxx_S_xxxxxx
P23640	206	S	xxxxxx_S_xDxxxE
O08629	753	S	xxxxxx_S_PPxxxx
Q4QQV6	244	S	xxxRxx_S_xExxxx
D4ACA6	707	T	xxxGxx_T_Pxxxxx
D4A510	304	S	xxxRxx_S_PxPxxx
Q7TP42	582	T	xxxxxx_T_DxDxxx
A2VD11	211	S	xxxxxx_S_DxExEx
A0A0G2K6I3	80	S	xxxxxx_S_DEExxx
Q3ZB99	412	T	xxxxxx_T_xxxxEx
A0A0G2K951	255	S	xxxxxx_S_PPxxxx
D4AE80	200	S	xxxxxx_S_Pxxxxx
D3ZYD7	1056	S	xRxRxx_S_xxxxxx
G3V792	195	S	xxxxxD_S_ExExxx
Q9Z1W6	297	S	xxxxxx_S_xxExxx
F1LNI5	524	S	xxxxxx_S_xExxEx
A0A0G2JWK2	375	S	xxxxxx_S_PKxxxx
D3ZU86	347	S	xxxxxE_S_Dxxxxx
A0A1B0GWY6	338	S	xxxxxx_S_DxExxx
D4AD05	332	T	xxxRxx_T_PPxxxx
Q27W01	42	S	xxxxxG_S_xxxxxx
Q8CJ99	681	S	xxxKxx_S_xxxxxx
G3V7E6	1855	S	xxxxxx_S_DxExxx
G3V9S3	1648	S	xxxSxx_S_xxxxxx
G3V7W3	106	S	xxxxxx_S_xDGxxx
Q4W1H3	1349	T	xxxxxx_T_PTxxxx
Q5BK07	137	T	xxxxxx_T_DxExxx
G3V8L3	277	S	xxxxRx_S_xxxxxx
Q5BK16	176	S	xxxxRx_S_xxxxxx
D3ZND9	128	S	xxxxxx_S_EDExxx
G3V9C6	1171	S	xxxxxx_S_xDDExx
E9PT59	601	S	xxxRSx_S_xxxxxx
D4A853	496	S	xxRxxx_S_Pxxxxx
M0R3M4	788	S	xxxxxx_S_PxxxxK
A0A0G2JZI9	133	S	xxxxxx_S_PTxxxx
Q5BJP0	65	S	xxxRKx_S_xxxxxx
D4A5D4	1467	S	xxxRSx_S_Pxxxxx
Q5XI50	544	S	xxxxxx_S_DEExxx
F1M1X9	871	T	xxxRxx_T_xxxxxx
F7DP88	223	S	xxxxxx_S_PRxxxx
D4A2N0	105	S	xxxxPx_S_Pxxxxx
A0A0H2UHQ9	572	S	xxxSxx_S_xxxxxx
A0A0G2K2M9	1341	S	xxxRRx_S_xxxxxx
D3ZL45	41	S	xxxxxx_S_xPxxxx
Q5RKJ2	274	T	xxxRxx_T_xxxxxx
A0A140TAB4	169	S	xxxxxx_S_xDSxxE
M0R9Q1	206	T	xxxRxx_T_PPxxxx
F1LQN9	493	S	xxxxSx_S_xxDxxx
Q9Z1H9	166	S	xxxxxx_S_DEExxx
F1LVK0	882	S	xxxxxx_S_PxKxxx
F1LPD3	469	S	xxxRxx_S_xPxxxx
A0A0G2K9F7	544	S	xxxxxx_S_PxRxxx
E9PSN4	903	S	xxRxxx_S_Pxxxxx
D4A1G8	1075	S	xxxxPx_S_Pxxxxx
E9PT74	332	S	xxxKxx_S_xxxxxx
M0R671	1087	S	xxxxxx_S_PPxxxx
Q5BJP4	129	S	xxxRSx_S_Pxxxxx
D4A720	183	S	xxxRSx_S_xxxxxx
A0A0G2KA14	7	S	xxxRSx_S_xxxxxx
E9PSW8	405	S	xxxRRx_S_xxxxxx
Q5U4F0	62	S	xxxxxx_S_DxExEx
D3ZQH1	466	S	xRxxxx_S_Pxxxxx
Q6P7A7	541	S	xxxxxG_S_xxxxxx
E9PTC3	647	S	xxxxxx_S_PxxxxK
Q925D6	28	T	xxxxxx_T_PPxxxx
A0A0G2K951	379	S	xxxxxx_S_DxEExx
D2XV59	44	S	xxxxxD_S_Dxxxxx
G3V7P8	298	S	xxxRRx_S_xxxxxx
D3ZBP2	266	T	xxxxxx_T_PPxxxx
D3ZZE0	82	S	xKxxxx_S_Pxxxxx
Q3ZB99	463	S	xxxxxx_S_PxxxxR
Q66H54	467	S	xxxxxx_S_PPxxxx
A0A0G2K9F7	481	S	xxxxxx_S_xxxSPx
Q711G3	223	S	xxxKxx_S_xPxxxx
Q4KM34	161	T	xxxRxx_T_xxxxxx
F1M842	641	S	xxxxxx_S_xxDxxx
D4A0D9	118	S	xxxRSx_S_xDxxxx
M0RD75	233	S	xxxRRx_S_xxxxxx
A0A0G2K0J4	274	S	xxxxxx_S_Pxxxxx
A0A0H2UHP4	584	S	xxxxxD_S_ExExxx
G3V897	925	T	xxxxxx_T_DxDxxx
B1WC40	13	S	xxxRSx_S_xxxxxx
D4A1Q2	374	S	xxxxxx_S_xDxxxx
G3V984	2844	S	xxxRSx_S_xxxxxx
F1LTE0	1547	S	xxxxxx_S_PPxxxx
G3V8R7	96	S	xxxRPx_S_Pxxxxx
Q3KRD1	193	S	xxxxRx_S_Pxxxxx
M0RDK4	269	S	xxxxSx_S_xxDxxx
A0A0G2K5K8	280	S	xxxxxx_S_DDExxx
E9PU01	101	S	RxxSxx_S_xxxxxx
F1M1X9	341	S	xxRxxx_S_Pxxxxx
F1LUC0	103	S	xxxxxx_S_Pxxxxx
D4A5R3	1059	S	xRxxxx_S_Pxxxxx
G3V661	161	S	xxxxxx_S_DxExxx
B2RYB3	522	S	xxxxxx_S_PxRxxx
B2RYN8	183	S	xxxxxx_S_Pxxxxx
A0A0G2K8Z6	919	S	xxxxPx_S_Pxxxxx
D4AC16	621	S	xxxRxx_S_xxxxxx
F1LN86	1141	S	xxxRRx_S_xxxxxx
O35889	1779	S	xxxxSx_S_xDxxxx
A0A0G2JTD1	480	S	xxxxRx_S_Pxxxxx
A0A0G2K174	1294	T	xxxxxx_T_SPxxxx
A0A0G2K3J4	618	S	xxxxxG_S_xxxxxx
D4A3E3	911	S	xxxRSx_S_xxxxxx
F1LY70	593	S	xxxxxx_S_xDGxxx
B5DFL0	183	S	xxxxxx_S_PPxxxx
D3ZWB1	129	T	xxxRxx_T_xxxxxx
A0A0G2JSM7	431	S	xxxxxx_S_PxRxxx
A0A0U1RRZ5	1007	S	xxxGxx_S_Pxxxxx
B5DEG7	441	S	xxxxxx_S_PExxxx
Q5XIU9	202	S	xxxxxx_S_Exxxxx
D3ZLS5	357	S	xxxxxD_S_xxExxx
D4A0U3	1049	S	xxxGxx_S_Pxxxxx
G3V9D1	457	T	xxxxxx_T_xxxxEx
A0A0G2K2X3	365	S	xxxxxx_S_xSExEx
D4AE00	272	S	xxxxxx_S_xEDxxx
Q5XI74	21	S	xxxxSx_S_xxxxxx
E9PSK7	366	S	xxRxxx_S_Pxxxxx
Q9JLU4	685	S	xxKRxx_S_xxxxxx
M0R7T1	440	S	xxxxxx_S_Pxxxxx
A0A0G2K5R7	820	S	xxxGxx_S_Pxxxxx
A0A0G2K4T7	413	S	xxxRRx_S_xxxxxx
F1M8L9	326	S	xxxRxx_S_xxSxxx
F1LNT3	381	S	xxxKxx_S_xxxxxx
A0A0G2JV35	284	S	xxxxPx_S_Pxxxxx
D3ZU63	133	S	xxxxxx_S_DEExxx
B5DF98	166	S	xxxRxx_S_xxSxxx
Q6AY46	46	S	xxxxRH_S_xxxxxx
G3V7T6	426	T	xxxxxR_T_Pxxxxx
Z4YNI2	388	S	xxxRRx_S_xxxxxx
A0A0H2UHQ3	458	S	xxxRxx_S_xxSxxx
A0A0H2UHV4	126	S	xxxxxx_S_xxExxx
D3ZV88	241	S	xxxxPx_S_Pxxxxx
D3ZQ55	448	S	xxxxPx_S_Pxxxxx
Q5M7V8	211	S	xxxxxx_S_xDxxxx
D3ZBP2	1113	S	xxxxxx_S_PExxxx
F1M842	320	S	xxxKxx_S_xxxxxx
P10634	264	S	xxxxxx_S_xDxxxx
A0A0G2JSR7	206	S	xxxxxG_S_xxxxxx
D4AE00	282	S	xxxxxG_S_xxxxxx
P15205	1812	S	xxxxxx_S_PPxxxx
D3Z7Z5	463	S	xxxxPx_S_Pxxxxx
Q5BJP4	100	S	RxxSxx_S_xxxxxx
Q5FVT1	34	S	xxxxxx_S_PxKxxx
D3ZAN6	711	S	xxxRxx_S_xExxxx
A0A0G2JVK8	108	S	xxxxxx_S_xxxEDx
A0A0G2K7N8	506	T	xxxxxx_T_Pxxxxx
F1M4A0	119	S	xxxxxD_S_xxExxx
F1M8E3	321	S	xxxxxx_S_PPxxxx
D3Z8D7	96	T	xxxxxx_T_PPxxxx
Q62901	593	S	xxxxPx_S_Pxxxxx
F1M4U9	1378	S	xxxKRx_S_xxxxxx
D3ZXX3	646	S	xxxRKx_S_xxxxxx
D4A769	621	S	xxxxSx_S_xxxxxx
A0A0G2JXH4	1259	S	xxxxxx_S_xEDxxx
Q6DGF2	227	S	xxxxxx_S_PxRxxx
G3V6K4	798	S	xxxxPx_S_Pxxxxx
D3ZHY6	814	S	xxxxxD_S_ExExxx
D3ZXL5	495	S	xxxRPx_S_Pxxxxx
Q5BJY3	26	S	xxxRPx_S_Pxxxxx
Q63475	693	S	xxxxxx_S_PSxxxx
O54701	385	S	Rxxxxx_S_xxxxxx
P13668	139	S	xxxxxx_S_xDxxxE
F1MAQ5	1441	S	xxxxRx_S_xxxxxx
F1M392	720	S	xxxxPx_S_Pxxxxx
A0A0G2JZY3	122	S	xxxxPx_S_Pxxxxx
A0A0G2K0L7	45	S	xxxRSx_S_xDxxxx
Q5XI72	141	S	xxxxxG_S_xxxxxx
A0A0G2KA88	1351	S	xxxxPx_S_Pxxxxx
D4A362	466	S	xxxxxx_S_xESxxx
A0A0H2UHQ9	771	T	xxxxxx_T_PPxxxx
D3ZAX5	821	S	xxxRRx_S_xxxxxx
A0A0H2UHV4	204	S	xxxxxD_S_xxExxx
A0A0G2K6T6	480	S	xxxxxR_S_xSPxxx
D4AB33	674	S	xxxxxG_S_Pxxxxx
Q7M0E3	119	S	xxxxxx_S_xxDxxx
F7EXH3	449	S	xxxxxx_S_PxxxxR
E9PTE1	957	T	xxxxxx_T_Pxxxxx
A0A0G2JZY6	2115	S	xxxxxx_S_PxxxxK
G3V625	357	S	xxxxxx_S_xxExxx
G3V9E4	187	S	xxxxxx_S_DDExxx
A0A0G2KA12	1031	S	xxxxxx_S_xEExxx
A0A0G2K2M9	1342	S	xxxRSx_S_xxxxxx
A0A0G2JYT1	21	S	xxxxxx_S_PxxxRx
Q5U2N3	593	S	xxxRRx_S_xxxxxx
Q6AY02	155	S	xxxxxx_S_DEDxxx
Q66HL2	109	S	xxxSxx_S_xxxxxx
D3ZTL2	597	S	xxxxxx_S_xxExxx
F1M7L9	82	S	xxxRxx_S_xPxxxx
P01237	206	S	xxxRRx_S_xxxxxx
D3ZKN4	783	S	xxxxxx_S_xEDxxx
D3ZWL9	149	S	xxxxxx_S_xxDxxx
D3ZHL6	335	S	xxxRxx_S_xxxxxx
A0A0G2JW50	268	S	xxxxxx_S_xESxxx
D3ZD05	424	S	xxxxPx_S_Pxxxxx
P17431	54	S	xxxRRx_S_xxxxxx
F1M6J5	540	S	xxxxxx_S_PExxxx
A0A0G2KAW2	1249	S	xxxxxx_S_PxKxxx
D3ZC56	5594	S	xxxRKx_S_xDxxxx
F1M5M9	874	S	xxxxxx_S_PPxxxx
A0A0G2K214	372	S	xxxxxG_S_xDxxxx
A0A0G2K5R7	956	T	xxxxPx_T_Pxxxxx
G3V7E6	1332	S	xxxxRH_S_xxxxxx
D4A4L4	623	S	xxxxxx_S_xEExxx
A0A0A0MXU2	325	S	xxxSxx_S_xxxxxx
A0A0G2K101	660	S	xxxxxx_S_DDDxxx
D4ADZ6	1785	S	xxxRRx_S_xxxxxx
P0DL28	82	S	xxxxxR_S_xSPxxx
M0R629	452	S	xxxxRx_S_xxxxxx
D3ZQQ1	413	S	xxxSxx_S_xxxxxx
A0A0G2QC38	477	S	xxxxxx_S_PKxxxx
P12369	83	S	xxxxxx_S_DxExxx
D3ZWL9	998	S	xxxxxx_S_PPxxxx
Q8K4I6	20	S	xxRxSx_S_xxxxxx
D3ZVU6	587	S	xxxxxx_S_Exxxxx
F1M820	54	S	xxxxxx_S_xxxSPx
F1LQ91	797	S	xxxRRx_S_xxxxxx
A0A140TAB3	418	S	xxxxxx_S_xDDExx
F1MAF8	397	S	xxxRSx_S_xDxxxx
Q5U303	524	S	xxxRKx_S_xxxxxx
A0A0G2K0J7	573	S	xxRxxx_S_Pxxxxx
P06536	171	T	xxxxxx_T_PTxxxx
G3V6W5	646	S	xxxxxx_S_xESxxx
G3V917	211	S	xxxxxx_S_PSxxxx
F7EV94	356	S	xxxxxx_S_xxDxxx
F1LTE0	1581	S	xxxRPx_S_Pxxxxx
G3V756	567	S	xxxxSx_S_xDxxxx
Q68G30	467	S	xxKRxx_S_xxxxxx
F1M779	191	S	xxxRKx_S_xxxxxx
Q5U205	39	S	xxxRxx_S_xExxxx
A0A0G2JSU7	251	S	xxxxxx_S_PPxxxx
F1LNP1	583	S	xxxxxG_S_Pxxxxx
E9PST5	210	S	RxxSxx_S_xExxxx
A0A0H2UI02	31	S	xxxRxx_S_xExxxx
Q3KR59	224	S	xxxxPx_S_Pxxxxx
F1MAQ5	518	S	xxxxxx_S_ExExxx
D3ZKI5	661	S	xxxRSx_S_xDxxxx
Q6PCT3	96	S	xxxxSx_S_xxDxxx
F1SW39	271	T	xxxxxx_T_xxxxEx
D3ZC94	397	S	xxxxRx_S_Pxxxxx
Q9JHY1	288	S	xxxxxx_S_EGExxx
B2RZ23	22	S	xxxxxx_S_xPxxxx
A0A0G2K6R9	3380	S	xxxRSx_S_xxxxxx
Q6IRK8	1731	S	xxxKxx_S_xxxxxx
Q6TXE9	790	S	xxxxxx_S_PSxxxx
F8WG67	9	S	xxxxxx_S_xPxxxx
Q76KC6	450	S	xxxRRx_S_xxxxxx
D3ZBZ6	1121	S	xxxRSx_S_xDxxxx
F1LY70	485	S	xxxxxD_S_Exxxxx
Q66H79	341	S	xxxxxx_S_PxKxxx
D4A5Y9	127	S	xxxxRR_S_xxxxxx
P08721	283	S	xxxxxx_S_xEDxxx
P08721	212	S	xxxSxx_S_xxxxxx
B5DF48	336	S	xxxxxx_S_xxxEDx
Q5U300	835	S	xxxxxx_S_PxKxxx
D3ZQJ3	137	S	xxxxxx_S_xEExxx
Q5U2P5	417	T	xxxxxx_T_PTxxxx
Q3C2P9	239	S	xxxRxx_S_xxxxxE
M0RDY6	1047	S	xxxRKx_S_xDxxxx
A0A0G2JWP1	302	S	xxxxxx_S_Pxxxxx
F1LNF1	84	S	xxxRxx_S_xDxxxx
F1LMA4	633	S	xxxxPx_S_Pxxxxx
D4A9D8	115	S	xxxRSx_S_xxxxxx
D4ACW0	362	S	xxxxxx_S_Pxxxxx
Q9JKS6	3632	S	xxxxPx_S_Pxxxxx
F1LMT5	237	S	xxxxxx_S_xExExE
F1M547	2803	S	xxRxxx_S_Pxxxxx
A0A0G2JTT6	2718	S	xxxRRx_S_xxxxxx
A0A0G2KB10	310	S	xxxxxx_S_DEDxxx
A0A0G2K3R1	1126	S	xxxxPx_S_Pxxxxx
F1LV12	276	S	xxxxRx_S_xxxxxx
Q66H66	228	S	xxxRxx_S_xExxxx
R9PXW6	116	S	xxxRRx_S_xxxxxx
A0A0G2K745	322	S	xRxxxx_S_Pxxxxx
G3V8F3	186	S	xxxxxx_S_PxRxxx
Q25C79	21	S	xxxxPx_S_Pxxxxx
F1M0L3	598	S	xxxxxx_S_PxRxxx
D3ZBV9	464	S	xKxxxx_S_Pxxxxx
P43138	18	S	xxxxxx_S_ExExxx
D3ZJX1	599	S	xxxxPx_S_Pxxxxx
A0A096MJC8	199	S	xxxxxG_S_Pxxxxx
A0A0G2JSM7	610	T	xxxxxx_T_PPxxxx
A0A0G2QBZ6	115	S	xxxxPx_S_Pxxxxx
D3ZN76	1227	S	xxxRxx_S_xxSxxx
D3ZET9	256	S	xxxSxx_S_xxxxxx
F1M4U0	115	S	xxxxxx_S_PxxxxK
F6T1W7	401	S	xxxxxx_S_DEExxx
Q62785	57	S	xxxxxx_S_xDxxxx
D3ZWU1	563	S	xxxxxD_S_ExExxx
A0A0G2K2M9	433	S	xxxxxx_S_xxExxx
B2RYB3	796	T	xxxxxx_T_Pxxxxx
D4AEB3	2620	S	xxxxxG_S_xxxxxx
D3Z8M8	406	S	xxxxxD_S_xxExxx
Q499R0	698	S	xxxxxx_S_Pxxxxx
Q6QI89	71	S	xxxxxG_S_xxxxxx
D4A0C3	669	S	xxxRRx_S_xxxxxx
A0A0G2K3J4	1439	S	xxxxxx_S_PxRxxx
Q3KR71	157	S	xxxxxx_S_DxExEx
P01237	162	S	xxxKxx_S_xxxxxx
P62024	104	T	xxxxxx_T_PPxxxx
D3ZS88	599	S	xxxRSx_S_xDxxxx
P85107	573	S	xxxxxx_S_ExExxx
Q8K1M5	48	S	xxKxxx_S_Pxxxxx
D4A2J9	1346	S	xxxRxx_S_Pxxxxx
A0A0G2JTT7	16	S	xxxRSx_S_xxxxxx
M9MMM8	357	S	xxxxRx_S_xxxxxx
D4A0Y2	1253	S	xxxRSx_S_xxxxxx
Q5PQM2	590	S	xxKRxx_S_xxxxxx
E9PSN4	264	S	xxxRxx_S_PxPxxx
A0A096MK76	295	S	xxxxxx_S_PKxxxx
Q5BJP5	24	S	xxxRxx_S_xDxxxx
G3V7X9	53	T	xxxxxx_T_PTxxxx
D4A510	283	S	xxxxxx_S_PxxxRR
D3ZJ92	881	S	xRxxxx_S_Pxxxxx
A0A0G2K527	379	S	xxxxxx_S_DEDxxx
F1M0H0	68	S	xxxxxx_S_PPxxRx
Q68FT9	11	S	xxxxxx_S_xESxxx
M0R6K4	1697	S	xxxxxx_S_PxxxxK
G3V8K2	5	T	xxxxxx_T_Pxxxxx
F1LNI8	287	T	xxxRxx_T_xxxxxx
O88794	241	S	xxxxxx_S_Pxxxxx
Q7TQ70	303	S	xxxxxG_S_xxxxxx
D3ZIM5	242	S	xxxRKx_S_xxxxxx
A0A0H2UHV2	1354	S	xxxxxG_S_Pxxxxx
A7XYI6	313	S	xxRxxx_S_Pxxxxx
D4A3X9	13	S	xxxxxx_S_PPxxxx
Q5RKG9	409	S	RxxSxx_S_xExxxx
G3V7N7	463	S	xxxRxx_S_xxxxxx
A0A0G2K9M5	1034	S	xxxxxx_S_PxxxxK
A0A0G2JTV2	602	S	xxxGxx_S_Pxxxxx
D3ZYD7	1026	S	xxxxxx_S_PPxxRx
D4ADZ2	548	S	xxxRSx_S_xxxxxx
F1LV40	651	S	xxxxPx_S_Pxxxxx
D3ZFK8	879	S	xxxxxx_S_xEDxxx
A0A0G2JSM0	63	S	xxxxxx_S_xDEExx
F1M031	197	S	xxxxxx_S_xDGxxx
Q63796	533	S	xxxxxx_S_PxxxRx
P47875	192	S	xxxxxx_S_Exxxxx
D3ZJA3	126	S	xxxxxx_S_PxxxRx
Q3MJK5	309	S	xxxRRx_S_xxxxxx
A0A0G2K2M9	1634	S	RxxSxx_S_xExxxx
Q4V8J5	127	S	xxxxRx_S_xxxxxx
G3V915	571	S	xxxxxx_S_PxxxxK
A0A0G2KAI2	850	S	xxxxxx_S_xESxxx
D3ZG78	2448	S	xxRxxx_S_Pxxxxx
P10037	126	S	xxxxxx_S_PExxxx
F1M9Q1	786	S	xxxxSx_S_xDxxxx
Q4V888	89	T	xxxxxx_T_PPxxxx
D3ZDF3	627	S	xxxRSx_S_xxxxxx
A0A0G2K2M9	1382	S	xxxxxx_S_xxExxx
D3ZWT6	421	S	xxxxxx_S_ExExxx
M0R991	277	S	xxxSxx_S_xxxxxx
A0A0G2K1W1	163	S	xxxRxx_S_xExxxx
P08721	273	S	xxxxxx_S_xExxxx
Q66HL2	364	T	xxxxxx_T_PPxxxx
A0A096MIS7	516	S	xxxKRx_S_xxxxxx
F1M1X9	398	S	xxxRSx_S_Pxxxxx
D3ZHV2	5372	S	xxxRRx_S_xxxxxx
P84586	198	S	xxxxxx_S_xxDxxx
Q9QY02	427	S	xxxxxG_S_Pxxxxx
Q4V889	166	S	RxxSxx_S_xExxxx
F1LQR8	1799	S	xxxxRx_S_xxxxxx
P13668	46	S	xxxxxx_S_xEExxx
A0A0G2JUR5	195	S	xxxxPx_S_Pxxxxx
E9PSX8	53	S	xxxRSx_S_xxxxxx
Q5QD51	685	S	xxxxxx_S_DDExxx
D3Z8E0	365	T	xxxxxx_T_Pxxxxx
D3ZQN3	602	T	xxxRxx_T_Pxxxxx
Q9JI66	1026	S	xxxxxG_S_xDxxxx
Q499N6	188	S	xxxxxx_S_PPxxxx
D3ZX42	56	S	xxxxxG_S_xxxxxx
A0A0G2JSM7	614	T	xxxxPx_T_Pxxxxx
A0A0G2K214	368	S	xxxxxG_S_xxxxxx
F1LQL1	858	S	xxxRKx_S_xDxxxx
P13084	70	S	xxxxxx_S_PxKxxx
F1LQ45	431	S	xxxRxx_S_Pxxxxx
A0A0G2K9M4	3317	S	xxxRRx_S_xxxxxx
A0A140UHX9	366	S	xxxKRx_S_xxxxxx
M0R9G4	1599	S	xxxxxx_S_DEExxx
F1LNP1	1353	S	Rxxxxx_S_xxxxxx
E9PSN4	137	S	xxxxxx_S_EEExxx
D3ZVE0	1238	S	xKxxxx_S_Pxxxxx
A0A0G2JSL4	671	S	xxxxPx_S_Pxxxxx
P02680	431	S	xxxxxG_S_xxxxxx
A0A0G2K2W6	178	S	xxxKxx_S_Pxxxxx
D4A0Q3	435	S	xxxRxx_S_PxPxxx
A0A0G2JWP2	1703	S	xxxxxx_S_xESxxx
D3ZUM2	548	S	xRxxxx_S_Pxxxxx
Q3KR71	749	S	xRxRxx_S_xxxxxx
G3V7P7	956	S	xxxxxx_S_xxxSPx
P62260	210	S	xxxxxx_S_xESxxx
A0A0G2JUG7	416	S	xxxxxx_S_PKxxxx
M0RC54	659	T	xxxRxx_T_Pxxxxx
D3ZYB4	187	S	xxxxxx_S_DDExxx
P34926	527	S	xExxxx_S_Pxxxxx
D3ZN60	397	S	xxxRxx_S_xxxxxx
B1WBZ1	298	S	xxxRxx_S_xxSxxx
D4A3E3	500	S	xxxxxx_S_PRxxxx
Q4KLL0	81	S	xxxxxx_S_xDxxxE
D3ZI42	244	S	xxxRRx_S_xxxxxx
F1M9C8	1028	S	xxxRRx_S_xxxxxx
A2VD12	166	S	xxxxxx_S_PPxxxx
F1M4W7	599	S	xxxxxx_S_DEDxxx
F1M6V1	445	S	xxxxxD_S_ExExxx
D3ZK47	588	S	xxxRSx_S_xxxxxx
A0A0G2JZX5	207	S	xxxKxx_S_xDxxxx
M0R9R0	86	S	xxxxSx_S_xxDxxx
D4AA13	1257	S	xxxxxG_S_xxxxxx
D3ZSB7	687	T	xxxxxR_T_Pxxxxx
A0A0G2JU91	2194	S	xxxSxx_S_xxxxxx
F1LPQ4	146	S	xxxxxx_S_xPxxxx
Q9Z2X5	158	S	xxxRSx_S_xDxxxx
D3ZQQ2	438	S	xxxxxx_S_PSxxxx
D3ZZQ0	680	S	xxxxxx_S_PxxxxK
D3ZUD3	235	S	xxxxPx_S_Pxxxxx
D4A3V5	198	S	xxxxxx_S_xxxSPx
A0A0G2JXT9	79	S	xxxRSx_S_Pxxxxx
F1LV37	1321	S	xxxxxx_S_PSxxxx
D3ZNS1	420	S	xxxxxx_S_PxRxxx
E9PTX9	931	S	xxxxxx_S_xxxSPx
Q66HK4	125	S	xxxxPx_S_Pxxxxx
E9PSN4	25	S	xxxRRx_S_xxxxxx
D3ZIQ8	595	S	xxxxxG_S_xxDxxx
D4AAI7	98	S	xxxxxx_S_DDDxxx
D3ZDV9	630	S	xxxxxx_S_EDExxx
D3ZWZ8	244	S	Kxxxxx_S_Pxxxxx
D3ZHL6	400	S	xxxRxx_S_xPxxxx
Q8VIL3	265	S	xxxxPx_S_Pxxxxx
G3V7T6	129	S	xxxxxx_S_PxRxxx
D3ZWA8	658	S	xxxxxE_S_Dxxxxx
F1LY38	91	S	xxxxxx_S_PxRxxx
A0A0G2JWL3	821	S	xxxRKx_S_xxxxxx
A0A0G2JVS3	194	S	xxxxPx_S_Pxxxxx
F1LPG9	448	S	xxxxxx_S_DEDxxx
A0A0G2JWL3	2460	S	xxxGxx_S_Pxxxxx
Q499S9	76	S	xxxRxx_S_xxxxxx
P0C6P5	344	S	xxxxxx_S_xDGxxx
Q641X8	412	S	xxxxSx_S_xxxxxx
Q9WU74	325	S	xxxxxG_S_xxxxxx
D3ZG18	936	S	xxxRSx_S_Pxxxxx
G3V9M1	106	S	xxxKRx_S_xxxxxx
Q3MJK5	310	S	xxxRRx_S_xxxxxx
A0A0G2K082	22	S	xxxxPx_S_Pxxxxx
M0R3Z8	668	T	xxxRxx_T_Pxxxxx
F1LU19	39	S	xxxxPx_S_Pxxxxx
D3ZU55	126	S	xxxxxx_S_PTxxxx
D3ZV54	893	T	xxxxxx_T_EExxxx
D4A022	929	S	xxxRSx_S_xDxxxx
Q925G1	150	S	xxxDxx_S_xxSxxx
E9PSX7	81	S	xxxxxx_S_xDEExx
F1MAQ5	1788	S	xxxxxx_S_PxRxxx
D4AD05	1326	S	xxxxxx_S_Pxxxxx
P61023	7	T	xxxRxx_T_xxxxxx
D4A9D8	213	S	xxxxxG_S_xxxxxx
Q64259	7	S	xxxxxx_S_PxxxxR
B2GV39	76	S	xxKRxx_S_xxxxxx
A0A0G2K928	365	S	xxxxSx_S_xxxxxx
F1LMV8	140	S	xxxGxx_S_Pxxxxx
B2RYB3	752	S	xxxRxx_S_xxSxxx
A0A0H2UHP9	184	S	xxxxxx_S_xEDxxx
Q5I0H5	350	S	xxxSxx_S_xxxxxx
P81377	9	S	xxxxxx_S_EDExxx
Q8VHK7	165	S	xxxxxx_S_PxRxxx
Q5U313	546	S	xxxxSx_S_xxxxxx
F1LQ66	338	T	xxxxPx_T_Pxxxxx
P26431	603	S	xxxKxx_S_xxxxxx
F1M4M5	925	S	xxxxxD_S_Dxxxxx
D4A9W1	1801	S	xxxRxx_S_xxSxxx
Q4KLL0	100	S	xxxxxx_S_PExxxx
D4A8G6	63	S	xxRxxx_S_Pxxxxx
A0A0G2JW20	279	S	xxxxxx_S_xEDxxx
O08623	266	T	xxxxxx_T_PTxxxx
Q8K422	55	S	xxxxxx_S_xExxxx
A0A0G2K129	409	S	xxxxxE_S_Dxxxxx
A0A0G2JW01	236	S	xxxRRx_S_xxxxxx
A2VD12	146	S	xxxxxx_S_DDDxxx
A4L9P7	1301	S	xxxxxx_S_xESxxx
D3ZRV1	87	S	xxxxxx_S_PPxxxx
A0A1W2Q695	135	S	xxxxxx_S_PxRxxx
D3ZHK4	652	S	xxxxxx_S_PRxxxx
D3ZZY2	469	S	xxxRKx_S_xxxxxx
A0A096P6M3	1141	S	xxxxxx_S_xxDxxx
M0R3M4	2386	S	xxxxxx_S_PPxxxx
Q5XIB5	170	S	xxxxPx_S_Pxxxxx
F1M842	1118	S	xxxGxx_S_Pxxxxx
F1LV13	392	S	xxxxxx_S_ExExxx
D3ZND9	512	S	xxxxxx_S_PPxxxx
Q6AXS3	310	S	xxxxxx_S_DDExxx
D3ZCP9	31	S	xxxxxx_S_PxxxxK
D3ZDF3	339	S	xxxRxx_S_xxSxxx
G3V9R8	217	S	xxxxxx_S_Pxxxxx
D4A544	16	S	xxxxxG_S_xDxxxx
A0A0G2K1Q9	446	S	xxxxSx_S_xDxxxx
P62997	71	S	Rxxxxx_S_xxxxxx
A0A0G2JTW5	272	T	xxxxxx_T_Pxxxxx
A0A0A0MXY5	674	S	xxxKxx_S_xDxxxx
A0A0G2K1E3	1030	S	xxxxxx_S_xESxxx
A0A0G2K4Q1	83	S	Kxxxxx_S_xxDxxx
Q9Z2P4	97	S	xxxxxx_S_PTxxxx
A0A0G2K5C7	230	S	xxxxPx_S_Pxxxxx
P84586	88	S	xxxxxx_S_xESxxx
B1WBZ7	338	S	xxxxxD_S_DxDxxx
Q63158	134	S	xxxGxx_S_Pxxxxx
A0A0G2K0M8	903	S	xxxxPx_S_Pxxxxx
F1M4M5	992	S	Rxxxxx_S_xxxxxx
Q5U2P5	422	T	xxxxxx_T_Pxxxxx
Q5PPJ8	80	S	xxxxxx_S_PxRxxx
A0A096MJ94	802	S	xxxxxx_S_xDxxxE
F1LSE6	648	S	xxxxPx_S_Pxxxxx
Q63450	324	S	xxxxxx_S_xExxxx
D3ZHQ8	382	S	xxxRxx_S_PxPxxx
D3ZBV9	371	S	xxxxxx_S_PExxxx
F1M842	921	T	xxxxxx_T_PPxxxx
Q562C2	112	S	xxxxxx_S_DEExxx
Q5PPG5	412	S	xxxxxx_S_xEDxxx
A0A0G2K5L6	1337	S	xxxxxx_S_xxDxxx
D4A4X4	132	S	xxxRSx_S_xxxxxx
A0A0G2JWF0	1112	S	xxxxPx_S_Pxxxxx
Q5XIS9	225	S	xxxxSx_S_xxDxxx
F1M1Y0	160	S	xxxxxx_S_PxxxxR
D3ZS50	160	S	xxxxxx_S_PPxxxx
D3ZYD7	1223	S	xxxxxx_S_xPxxxx
D3ZSB7	347	S	xxxxxx_S_PPxxxx
R9PXR4	99	S	xxxxxG_S_xxDxxx
F1M9G6	9	S	xxxxxG_S_xxDxxx
F1LR60	266	S	xxxRxx_S_xExxxx
G3V9P0	128	S	xRxxxx_S_Pxxxxx
D4A5D4	1176	S	xxxRxx_S_xxSxxx
Q6P6G9	4	S	xxxxSx_S_xxxxxx
O55173	244	S	xxxRxx_S_xxxxxx
G3V6S9	639	S	xxxxxG_S_xxxxxx
G3V6D5	63	S	xxxRSx_S_Pxxxxx
D3ZXM2	388	S	xxxxxx_S_DxExxx
A0A0G2JXD9	714	S	xxxxxx_S_xxxSPx
Q62671	317	S	xxxxxx_S_xDxxxx
D3ZP87	231	T	xxxxxx_T_xxxxEx
F1LRT0	1164	S	xxxxxx_S_xEDxxx
A0A0G2KAI2	513	S	Kxxxxx_S_Pxxxxx
D3ZFH5	64	S	RxxSxx_S_xExxxx
F1LR60	288	S	xxxxSx_S_xDxxxx
D3ZEM6	1081	S	xxxxxx_S_PPxxxx
D3ZKI6	373	S	xxxRRx_S_xxxxxx
Q9R0W1	60	S	xxxxxx_S_xxxSPx
F1M2K6	136	S	xxxxxx_S_Exxxxx
A0A0G2JU91	868	S	xxxSxx_S_xxxxxx
Q9JMC1	897	S	xxxxRx_S_xxxxxx
P10362	575	S	xxxxxG_S_xxxxxx
D3ZSU3	398	S	xxxKxx_S_xxxxxx
A0A096MIW3	854	S	xxxxxG_S_xxxxxx
Q9ESZ0	484	S	xxxxxx_S_xDxxxE
D3ZS06	718	S	xxxxxx_S_PxKxxx
D3ZCC7	240	S	xxxxxx_S_DxExxx
F1LSX7	20	S	xxxxxx_S_PRxxxx
G3V897	1083	S	xxxxxD_S_DxDxxx
D3ZBP2	861	S	xxxxxx_S_PPxxxx
B2GV01	54	S	xxxxSx_S_xxxxxx
A0A096MJM7	238	S	xxxRRx_S_xxxxxx
D3ZYT8	1765	S	xxxxxx_S_Pxxxxx
Q6MGA9	297	S	xxxxPx_S_Pxxxxx
P0C5Y8	486	S	xxxxxx_S_PxxxxK
F1LYQ8	837	S	xxxxRx_S_xxxxxx
Q91ZQ0	23	S	xxxxxG_S_xxDxxx
Q63400	198	S	xxxxxx_S_xPxxxx
P51799	9	S	xxxKxx_S_xxxxxx
D4A296	97	S	xxxxxx_S_xDGxxx
D3ZT52	1315	S	xxxKRx_S_xxxxxx
B0BND9	110	S	xExxxx_S_Pxxxxx
F1LSM2	363	S	xRxxxx_S_Pxxxxx
F1LVK0	2180	S	xxxxxx_S_PxxxxK
Q5M7V8	746	S	xxxxxx_S_xExxxx
A0A0G2JYV0	1090	S	xxxxxx_S_PPxxxx
D4A554	617	S	xxxxxx_S_EGExxx
Q5U2M8	438	S	xxxxxD_S_DxDxxx
Q9QXY2	900	S	xxxxPx_S_Pxxxxx
F1LP81	543	S	xxxxxx_S_PPxxxx
B5DF41	200	S	xxxxxx_S_xxxSPx
M0R3L1	91	S	xxxRRx_S_xxxxxx
M0R965	118	S	xxxxxx_S_EEExxx
D3ZNS7	557	S	xxxxPx_S_Pxxxxx
Q6IMY8	58	S	xxxxxG_S_xDxxxx
D4A2K6	522	S	xxxxxD_S_xxExxx
Q5FVJ3	62	S	xxxRRx_S_xxxxxx
D3ZFY7	155	S	xxxxxx_S_PxRxxx
D3ZL57	392	S	xxxGxx_S_Pxxxxx
D4AB71	513	S	xxxxPx_S_Pxxxxx
F1M8L4	862	S	xExxxx_S_Pxxxxx
A0A0G2K9Y5	145	S	xxxxxx_S_xEDxxx
Q3MID9	403	S	xExxxx_S_Pxxxxx
D3ZQK5	544	S	xxxxPx_S_Pxxxxx
D3ZWA1	80	S	Kxxxxx_S_Pxxxxx
A0A0G2K3J4	305	S	xxxxxx_S_xExxxx
D3ZAP7	2943	S	xxxxxx_S_DxEExx
D3ZFK8	492	S	xxxxxx_S_PxRxxx
G3V7X9	173	S	xxxxxx_S_PTxxxx
F1SW39	494	S	xxxxxx_S_xEExxx
A0A0G2K5C0	303	S	xxxxxx_S_PRxxxx
A0A0G2JXZ3	667	S	xxxxxx_S_xSDxEx
A0A0G2JU01	244	S	xxxRKx_S_xxxxxx
G3V7S5	182	S	xxxRxx_S_Pxxxxx
F1LVK0	1013	S	xxxxxx_S_xExxxx
D4AD15	1223	S	xxxxPx_S_Pxxxxx
A0A096MJY0	1744	S	xxxRRx_S_xxxxxx
Q3B7D0	101	S	xxxRSx_S_Pxxxxx
D3ZGQ8	1232	S	xxxxxE_S_Dxxxxx
G3V6J7	333	S	xxxxxx_S_DDExxx
Q5M971	84	S	xxxxxx_S_xDxxxx
A0A0G2K700	421	S	Rxxxxx_S_xxxxxx
A0A0H2UHF9	383	S	xxxxxx_S_PxxxxR
F1M6U0	925	T	xxxRxx_T_xxxxxx
M0R7T1	477	S	xxxRxx_S_xPxxxx
A0A0G2JWE3	666	S	xRxRxx_S_xxxxxx
F1M0H0	1702	S	xxxxxx_S_PKxxxx
Q3MIF2	685	S	xxxxxR_S_xSPxxx
F1LNV7	1476	S	xxxRRx_S_xxxxxx
M0RAP6	918	S	xxxxxx_S_xEDxxx
G3V6S8	297	S	xxxRSx_S_xxxxxx
D3ZJ32	682	S	xxxSxx_S_xxxxxx
A0JPQ3	286	S	xxxxPx_S_Pxxxxx
D4A206	1254	S	xxxxxx_S_PxKxxx
D3ZT07	327	S	xxxRxx_S_PxPxxx
D3ZZ26	58	S	xxxxPx_S_Pxxxxx
D3ZFK8	490	S	xxxxRx_S_xxxxxx
D4A9L5	648	S	xxxxxx_S_DxExEx
A0A0G2K3H2	900	S	xxxxSx_S_xxDxxx
M0R991	274	S	xxxxxx_S_Exxxxx
A0A0G2JVK3	107	S	Kxxxxx_S_xxDxxx
D3ZJU5	309	S	xxxxxx_S_PxRxxx
G3V7U4	20	T	xxxxPx_T_Pxxxxx
Q80ZD7	477	S	xxxRRx_S_xxxxxx
Q7TPH4	603	T	xxxRxx_T_xxxxxx
Q5EB62	45	T	xxxxxx_T_PPxxxx
A0A0G2JYI0	1148	S	xxxxxx_S_xxDxxx
P34926	2204	S	xxxxxx_S_PSxxxx
B5DEK2	571	S	xxxGxx_S_Pxxxxx
F1LWN1	210	S	xxxxxx_S_xxxEDx
A0A0G2K961	509	S	xxxxxx_S_xxxSPx
F1MAK3	966	S	xxxxxx_S_PxxxxK
D3ZJR1	255	S	xxxxxx_S_PxxxxK
G3V8F3	296	S	xxxRxx_S_Pxxxxx
A0A0G2QC21	228	S	xxxxPx_S_Pxxxxx
D3ZDZ1	500	S	xxxxxx_S_PxxxRx
Q9WU74	327	S	xxxxxx_S_xExxxx
D4A517	593	S	xxxxxx_S_PPxxxx
D4A5T8	1655	S	xxxxRR_S_xxxxxx
G3V888	457	S	xxxxSx_S_xxxxxx
G3V6Z3	669	S	xxxxPx_S_Pxxxxx
Q6AYU5	272	S	xxxxxx_S_PExxxx
A0A0G2K8Y5	450	S	Rxxxxx_S_xxxxxx
E9PSN0	1534	S	xxxRRx_S_xxxxxx
F1M403	686	S	xxxxPx_S_Pxxxxx
Q8R2E7	207	T	xxxxxx_T_Pxxxxx
B2RYB3	640	S	xxxRRx_S_xxxxxx
Q5XIS9	711	S	xxxxRR_S_xxxxxx
B2RYB3	728	S	xxxRRx_S_xxxxxx
D4A4W6	105	S	xxxxxx_S_DEExxx
A0A0A0MXU2	778	S	xxxxxx_S_xExxxx
D3ZDV9	497	T	xxxRxx_T_xxxxxx
Q62848	246	S	xxxxxx_S_xxExxx
D4A853	718	S	xRxxxx_S_Pxxxxx
D4AD03	259	S	xxxxxx_S_xExxxx
Q4KMA1	301	S	xxxRRx_S_xxxxxx
F1MA61	396	S	xxxxPx_S_Pxxxxx
M0RBD3	290	T	xxxxxx_T_PPxxxx
P63004	57	S	xxxKxx_S_xxxxxx
D3ZMD3	399	S	xxRxxx_S_Pxxxxx
A0A0G2K7H9	327	S	xxxxSx_S_xxxxxx
D4A4L4	704	S	xxxGxx_S_Pxxxxx
Q5M9G6	124	S	xxxxxx_S_ExExxx
M0R9T2	655	S	xxxxxx_S_xEDxxx
Q4KM57	307	S	xxxxxx_S_xSDxEx
D4A4K4	961	S	xxxRKx_S_xDxxxx
D4A778	1151	S	xxxxxx_S_PxKxxx
A0A0G2JT88	571	T	xxxxxx_T_Pxxxxx
D4A6X3	74	S	xxxRxx_S_xPxxxx
D3ZWB2	918	S	xxxRxx_S_xDxxxx
A0A0G2K556	159	S	xRxRxx_S_xxxxxx
M0R8Z9	759	S	xRxRxx_S_xxxxxx
P34058	255	S	xxxxxx_S_DEExxx
M0R3M4	837	S	xxxxxx_S_PxRxxx
A0A0G2K1K8	404	S	xxxxPx_S_Pxxxxx
A0A0G2K2F4	160	S	xxxRxx_S_xxxxxx
D3ZN76	2089	S	xxxRxx_S_xxxxxE
F1LR10	603	S	xxxxxx_S_PKxxxx
Q4V893	190	S	xxxxxx_S_PxxxxR
Q9JMD2	772	S	xxxxPx_S_Pxxxxx
F1M787	520	S	RxxSxx_S_xxxxxx
Q6AXS5	352	S	xxxxxx_S_xxExxx
Q641X2	312	S	xxxxxx_S_DxExxx
O70188	343	S	xxxxxx_S_PRxxxx
A0A0G2K0J4	318	S	xxxxxx_S_PxxxxK
F1LN42	1501	T	xxxGxx_T_Pxxxxx
Q1JUA4	147	T	xxxxxx_T_PTxxxx
A0A0G2JXZ3	654	T	xxxxxx_T_Pxxxxx
Q5BJY4	15	S	xxxxxx_S_xExxxx
F1M392	217	S	xxxxxx_S_PxxxxR
D3ZQJ3	537	S	xxxxxx_S_PPxxxx
F1LU97	673	S	xxxRSx_S_xDxxxx
F1LR52	609	T	xxxxPx_T_Pxxxxx
A0A0G2KB10	118	S	xxxxxx_S_PPxxRx
D3Z9K4	232	T	xxxRxx_T_Pxxxxx
A0A0H2UHV4	121	S	xxxRPx_S_xxxxxx
Q62950	8	S	xxxxxx_S_xPxxxx
F1M241	929	T	xxxRxx_T_xxxxxx
A0A0G2K2M9	927	S	xxxRxx_S_PxPxxx
Q4KLK7	535	S	xxxKxx_S_xPxxxx
B5DF95	222	S	xKxxxx_S_Pxxxxx
F1LTE0	400	S	xxxxxx_S_PxxxxK
D3ZH46	423	S	xxxSxx_S_xxxxxx
Q9JKS6	1778	S	xxxxxx_S_Pxxxxx
D3ZQL6	613	S	xxxxxx_S_PxxxxK
F1M6Z0	873	S	xxRxxx_S_Pxxxxx
A0A0G2JZ79	348	S	xxxxxx_S_PxRxxx
A0A0G2K6X6	453	S	xxxxPx_S_Pxxxxx
Q9ET45	79	S	xxxxxx_S_xxExxx
D3ZWS0	1387	S	xxxKRx_S_xxxxxx
A0A0G2K3J3	148	S	xxxxxG_S_Pxxxxx
F1LN75	312	S	xxxxxx_S_xExxxx
F1M265	735	S	xxRRxx_S_xxxxxx
D3ZDU2	877	S	xxxxxx_S_PPxxxx
Q6QI79	163	S	xxxxxx_S_xSDxEx
D3ZFD0	140	S	xxxKRx_S_xxxxxx
A0A0G2K9F0	125	S	xxxxxx_S_PPxxxx
P08721	26	S	xxxxxx_S_xEExxx
A0A0G2K5C7	510	S	xxxxxx_S_xExxxx
A0A0G2K376	541	S	xRxRxx_S_xxxxxx
D4A702	357	S	xxxRSx_S_xxxxxx
A0A0G2K7X3	79	S	xxxxxD_S_ExExxx
D3ZUL5	101	S	xxxRxx_S_xExxxx
D4A3E3	426	S	xRxxxx_S_Pxxxxx
G3V917	1455	S	xxExxx_S_xxEExx
F1M0L3	193	T	xxxxxx_T_PPxxxx
A0A0G2JZ04	133	S	xxxxPx_S_Pxxxxx
Q5M881	15	S	xxxxxx_S_PxxxxK
Q921A2	17	S	xxxRSx_S_xxxxxx
P63329	462	S	xxxKxx_S_Pxxxxx
D3ZLQ1	325	S	xxxxxx_S_xExExx
A7XYI6	627	S	xxxRxx_S_Pxxxxx
D3ZU55	299	S	xxxxxx_S_xxxSPx
Q3ZAU6	353	S	xxxxxx_S_PxKxxx
A0A0G2JWL3	2510	T	xxxxxx_T_PPxxxx
F1M3G7	765	S	xExxxx_S_Pxxxxx
Q5U328	428	S	xxxRxx_S_xDxxxx
M0R919	94	S	xxRxxx_S_Pxxxxx
D4A224	1171	S	xxxRSx_S_xxxxxx
F1LPA3	1053	S	xxxxxx_S_PKxxxx
A0A0G2K2M9	760	S	xxxRSx_S_xxxxxx
A0A0G2K5S1	137	S	xxxxPx_S_Pxxxxx
B1WC02	575	S	xxxGxx_S_Pxxxxx
A0A0G2K6R9	1835	S	xKxxxx_S_Pxxxxx
M0R617	126	S	xxxxxx_S_xEDxxx
Q80X08	8	S	xxxxxD_S_Exxxxx
A0A0G2JU96	5263	S	xxxRSx_S_xxxxxx
E9PSX7	82	T	xxxxxx_T_DxExxx
F1LR04	487	S	Kxxxxx_S_Pxxxxx
Q63475	334	S	xxxxxx_S_xPxxxx
Q5RJQ2	350	T	xxxxPx_T_Pxxxxx
A0A0G2JW01	289	S	xxxRxx_S_Pxxxxx
Q9ESN0	581	S	xxxxxx_S_xxDxxx
D3ZSP7	1080	S	xxxRRx_S_xxxxxx
Q5XI69	197	S	xxxxxx_S_PxRxxx
O35303	95	S	xxxRxx_S_xxxxxE
D4AEK9	412	S	xxxRSx_S_Pxxxxx
Z4YNN0	18	S	xxxxxx_S_PxxxRx
F1LQI2	917	S	xxxKxx_S_xxxxxx
D4A6C5	223	S	xxxxxx_S_PxxxxK
D3ZZ51	1148	S	xRxRxx_S_xxxxxx
Q498C8	95	S	xxxxxD_S_Dxxxxx
Q7TQ70	428	S	xxxxxx_S_xDGxxx
F1M842	1216	S	xxxDxx_S_xxSxxx
D3ZMY8	2476	S	xxxxxG_S_Pxxxxx
F1LMV6	2827	S	xxxxxx_S_xPxxxx
D3ZAY8	380	S	xxxxxD_S_xxExxx
Q5RJR2	143	S	xxxxxx_S_Pxxxxx
P31662	682	S	xxxxxx_S_xxxSPx
A0A0G2K531	112	S	xxxxxx_S_Exxxxx
D3ZHV2	280	S	xxxxxx_S_xDExxx
F1M842	384	S	xxxxPx_S_Pxxxxx
E9PSN4	326	S	xxxSxx_S_xxxxxx
A0A0G2JV49	769	S	xxxxxx_S_DxExxx
A0A0G2QC41	21	S	xxxxPx_S_Pxxxxx
M0RDI3	400	S	Kxxxxx_S_Pxxxxx
Q99P99	466	S	xxxRxx_S_xPxxxx
F1M907	349	S	xxxRxx_S_xExxxx
P17431	92	S	xxxRSx_S_xxxxxx
R9PXY3	881	S	xxxxPx_S_Pxxxxx
F1M9C8	1086	S	xxxRxx_S_xPxxxx
F1LXQ7	1737	S	xxxKxx_S_xxxxxx
Q5XHZ8	533	S	xxxxSx_S_xDxxxx
D4AAI9	1858	S	xxxxxG_S_xxxxxx
B1WC33	103	S	xxxxxG_S_xxDxxx
A0A0G2JZG4	570	S	xxxxxx_S_PxRxxx
D4A0D9	121	S	RxxSxx_S_xExxxx
P97531	296	S	xxxRxx_S_xxSxxx
D4A3V5	251	S	xxxxxx_S_PxRxxx
D3ZYR0	337	S	xxxxxx_S_xxxSPx
Q5RJK5	95	S	xxxxxx_S_DxExxx
E9PSJ4	718	S	xxxxSx_S_xxDxxx
F1M049	636	S	xxxxxx_S_PSxxxx
F1MA89	83	S	xxxKRx_S_xxxxxx
Q642B5	46	S	xxxxRx_S_xxxxxx
D4A0D9	696	S	xxxxxx_S_PPxxxx
D3ZAP7	1863	S	xxxxxx_S_PPxxxx
D3ZWC6	220	S	xxxxPx_S_Pxxxxx
A0A0G2KB48	224	S	xxRxxx_S_Pxxxxx
F1LLX6	29	S	xxxSxx_S_xxxxxx
G3V7W3	639	S	xxxRxx_S_Pxxxxx
D4A644	516	S	xxxxxx_S_xxxSPx
G3V650	2113	T	xxxxxx_T_PPxxxx
A0A0G2K2Q1	1046	S	xxxxxx_S_PxxxxR
D3ZR50	1535	S	xxxxPx_S_Pxxxxx
F1M3D2	643	S	xxxxPx_S_Pxxxxx
D4A5A6	1913	S	xxxxPx_S_Pxxxxx
A0A0G2K2M9	1633	S	xxxxxx_S_xxExxx
Q641Z1	635	S	xxxxxx_S_PxRxxx
G3V9J8	632	S	xxxxxx_S_DEExxx
Q9QY02	311	S	xxxRxx_S_Pxxxxx
G3V9F5	11	S	xxxxSx_S_xDxxxx
A0A0G2JUT1	365	T	xxxxxD_T_xxxxxx
A0A0G2K2M9	1393	T	xxxxPx_T_Pxxxxx
M0R7E6	165	T	xxxxxx_T_PPxxxx
Q641W3	333	S	xxxxSx_S_xxDxxx
Q5M9G8	147	S	xxxxxG_S_xxxxxx
D4AED1	308	S	xxxxxx_S_PPxxRx
D4AD05	1316	S	xxxxxx_S_xxxSPx
Q1EG89	85	S	xxxxxx_S_Pxxxxx
D3ZZQ0	688	S	xxxRxx_S_Pxxxxx
A0A0G2JTY6	245	S	xKxxxx_S_Pxxxxx
A0A0G2K9F7	665	S	xxKxxx_S_Pxxxxx
F1LW22	1119	S	xxxxxx_S_PRxxxx
D3ZSY3	608	S	xxxRxx_S_Pxxxxx
Q9Z301	971	S	xxxxxx_S_PPxxxx
D3ZC56	3073	T	xxxRxx_T_Pxxxxx
D3ZIP3	95	S	xxxxxx_S_EEExxx
D3ZWB4	571	S	xxxRSx_S_xxxxxx
F1LSL2	86	S	xxxxxx_S_PRxxxx
F1M1Y0	265	S	xxxRxx_S_Pxxxxx
F1M4V3	186	S	xxxxPx_S_Pxxxxx
B0BN77	187	S	xxxxxx_S_PPxxxx
D3ZS06	958	S	xxxxxx_S_PxxxxK
Q2THW6	603	S	xxxRxx_S_xDxxxx
G3V662	1087	S	xxxxxx_S_PSxxxx
D3ZS69	453	S	xxxxxx_S_xDxxxE
Q5RKH1	368	S	xxxRSx_S_Pxxxxx
A0A096MIY2	194	S	xxxxxx_S_PxRxxx
D3ZF54	651	S	xxxxxx_S_xExExE
Q9QYM0	43	S	xxxRxx_S_xExxxx
A0A0G2JZY3	114	S	xxxxxx_S_xxxSPx
D4A4F4	159	S	xxxRSx_S_Pxxxxx
G3V7H8	1082	S	xxxxxx_S_xxxSPx
Q6AXQ9	288	S	xxxxSx_S_xxxxxx
A0A0G2K2F4	136	S	xxxRSx_S_xxxxxx
Q4G008	306	S	xxxxSx_S_xxxxxx
M0R991	259	S	xxxxxG_S_xxxxxx
Q6MGA9	631	S	xxxxxD_S_ExExxx
A0A0G2K9C5	436	T	xxxxxR_T_Pxxxxx
D3ZMX6	204	S	xxxxPx_S_Pxxxxx
Q6PCU4	69	S	xxxxSx_S_xDxxxx
D3ZHK4	237	S	xxxxxx_S_xExxxx
M0R6Q2	13	S	xxxGxx_S_Pxxxxx
A0A0G2JXZ3	770	S	xxxRKx_S_xxxxxx
F1LV79	526	S	xxxxxx_S_xPxxxx
D4AAH9	562	T	xxxxxD_T_xxxxxx
Q9Z136	1077	S	xxxxxG_S_xxxxxx
E9PST5	730	S	xxxxxx_S_PxKxxx
A0A0H2UHK0	100	S	xxxxxx_S_Exxxxx
A0A0G2K2B4	1430	S	xxKxxx_S_Pxxxxx
F1M2K4	464	S	xxxRSx_S_xxxxxx
Q5XI28	31	T	xxxxxR_T_Pxxxxx
A0A0G2JVK8	69	S	xxxxxx_S_DxExEx
Q9JKL8	975	S	xxxxSx_S_xxxxxx
M0R9R0	639	S	xxxxxx_S_PxxxxR
D3ZYT5	407	S	xxxxxx_S_PKxxxx
Q811S9	468	S	Kxxxxx_S_Pxxxxx
A0A0G2KB10	603	S	xxxGxx_S_Pxxxxx
D4ACZ5	329	S	xxxxxx_S_xESxxx
D4A0H1	209	S	xxxxxx_S_DDExxx
M0R5Q3	32	S	xxxGxx_S_Pxxxxx
F1LNF1	230	S	xxxxxG_S_xxxxxx
F1M547	2797	S	xKxxxx_S_Pxxxxx
D3ZMN5	268	S	xxxxxx_S_xDxxxE
D3ZZW1	1756	S	xxxRRx_S_xxxxxx
D4A582	1826	S	xxxxxx_S_EGExxx
Q5PPJ2	331	S	xExxxx_S_Pxxxxx
F1M049	512	T	xxxRxx_T_Pxxxxx
F1M0J7	463	S	xxxxxG_S_xxxxxx
A0A0G2JWM2	25	S	xxxxxx_S_DxExxx
D3ZEI6	9	S	xxxxxx_S_PxRxxx
M9MMM8	368	S	xxxxxx_S_PxxxRR
D4ABL6	182	S	xxxRRx_S_xxxxxx
F2Z3R4	399	S	xxxxxD_S_xxExxx
D3ZZJ7	206	S	xxxRxx_S_xxxxxE
B5DF93	179	S	xxxRSx_S_Pxxxxx
F7FD47	71	S	xxxxxx_S_xEDxxx
F1LR52	631	S	xxxxRx_S_xxxxxx
Q5XIG5	27	S	xxxxxx_S_DxExxx
Q6IRG7	196	S	xxxxxG_S_xxxxxx
B2RYB3	558	S	xxxRxx_S_PxPxxx
A0A0G2K2M9	1879	S	xxxRRx_S_xxxxxx
A0A0H2UHQ9	807	S	xxxxxx_S_PxKxxx
A0A0G2K1Q9	513	T	xxxxxx_T_Pxxxxx
Q4V7C1	331	S	xxxxxx_S_xEDxxx
A0A0G2K928	361	S	xxxRxx_S_Pxxxxx
D3ZP87	230	T	xxxxxx_T_xxxxEx
F1M9D0	239	S	xxxRxx_S_xPxxxx
D3ZQ89	717	S	xxxxPx_S_Pxxxxx
D4A410	256	S	xxxRRx_S_xxxxxx
B1H245	134	S	xxxxxx_S_xPxxxx
F1MA89	326	S	xxxRSx_S_xDxxxx
A0A0G2JTF2	735	S	xxxxxG_S_Pxxxxx
A0A0G2JUG7	89	S	xxxxSx_S_xxxxxx
D3ZHV2	1578	S	xxxxRx_S_xxxxxx
D3ZWG2	215	S	xxxRSx_S_Pxxxxx
A0A0G2JXZ3	919	S	Kxxxxx_S_Pxxxxx
Q66HK4	515	S	Kxxxxx_S_Pxxxxx
B2GUU9	557	S	xxxxPx_S_Pxxxxx
E9PU01	1546	T	xxxxPx_T_Pxxxxx
A0A0G2K1U5	250	S	xxxxxx_S_xSExEx
B2RYB3	450	S	xxxxxx_S_PxxxxR
P15205	1915	S	xxxxxx_S_xExxEx
B5DF26	65	S	xxxxxG_S_xxxxxx
F1M589	605	S	xxxxxx_S_xxExxx
Q6AY30	209	S	xxxxxG_S_xxxxxx
P51514	79	S	xRxxxx_S_Pxxxxx
G3V8F3	135	S	xxxxxx_S_PPxxxx
A0A0G2K9C8	19	S	xxxRSx_S_xxxxxx
D4A7U5	733	S	xxxxPx_S_Pxxxxx
A1A5P0	318	S	xxRRxx_S_xxxxxx
D4A9L5	378	S	xxxRxx_S_PxPxxx
A0A0G2QC22	150	S	xxxxxx_S_PxKxxx
B2RYB3	877	S	xxxxxx_S_ExExxx
A0A0G2K1C6	1114	S	xxxxxE_S_Dxxxxx
A0A0G2JZ48	137	S	xxxxPx_S_Pxxxxx
F1LW91	1876	S	xxxRRx_S_xxxxxx
Q10758	274	S	xxxxxx_S_xxExxx
A0A0G2K928	213	S	xxxRSx_S_xxxxxx
A0A0G2JWJ5	1446	S	xxxxSx_S_xxxxxx
D4AB66	299	S	xxxxxx_S_xxExxx
G3V7X9	51	T	xxxxxx_T_PTxxxx
B2RYB3	530	S	xxxxxx_S_PxxxxK
E9PSN4	368	S	xxxxxR_S_xSPxxx
M0RD75	234	S	xRxRxx_S_xxxxxx
D3ZMS1	763	T	xxxGxx_T_Pxxxxx
F1LQ91	158	S	xxxDxx_S_xxSxxx
D3ZAS2	755	S	xxxxxx_S_xEDxxx
D3ZJ01	182	S	xxxxSx_S_xxDxxx
B0BND5	53	S	xxxxxx_S_xDSxxE
Q80X08	1042	S	xxxxxx_S_ExExxx
F1LZQ6	839	S	xxxxxG_S_xxxxxx
M0R671	825	S	xxxGxx_S_Pxxxxx
M0R9Z5	71	S	xxxxxx_S_PTxxxx
A0A0G2K2M9	2027	S	xxxxxx_S_PPxxRx
B1WC16	512	S	xxxxxx_S_PPxxxx
D3ZZZ0	1214	S	RxxSxx_S_xxxxxx
D3ZMD3	19	S	xxxRSx_S_Pxxxxx
D4A3G2	270	S	xxxxxx_S_DxExxx
F1M589	533	S	xxxxxx_S_xESxxx
D4A2J9	423	S	xxxxxx_S_PPxxxx
D3ZM69	675	S	xxxxxx_S_xExxxx
D4A518	732	S	xxxxPx_S_Pxxxxx
F7FKI5	292	S	xxxxxx_S_xxDxxx
G3V624	454	T	xxxxxD_T_xxxxxx
A0A0G2K101	261	S	xxxRKx_S_xDxxxx
B2RYD7	497	S	xxxxxx_S_DEDxxx
A0A0G2K4G0	454	T	xxxxxR_T_Pxxxxx
A0A0G2K2F8	874	S	xxxRKx_S_xxxxxx
G3V6M4	634	S	xxxxxx_S_xDxxxE
M0R3M8	1213	S	xxxxxG_S_xxxxxx
Q5M9I6	216	S	xxxSxx_S_xxxxxx
P41777	567	S	xxxxxx_S_EEExxx
A0A0G2K1L5	148	S	xxxRSx_S_xxxxxx
P62997	99	S	xxxxxx_S_PxxxRR
G3V917	1456	S	xxxxxx_S_xEExxx
D3ZWB2	1585	S	xxxSxx_S_xxxxxx
D3ZWE3	151	S	xxxxPx_S_Pxxxxx
F1LVZ8	185	S	xxxRRx_S_xxxxxx
D3ZNA1	1454	S	xExxxx_S_Pxxxxx
G3V7Q4	448	S	xxxxxx_S_xDGxxx
P35353	396	S	xxxRxx_S_xPxxxx
Q9JI66	68	S	xxxxxx_S_DxExxx
F1M3G7	2345	S	xxxxxx_S_PxxxxR
F1M7Q7	414	S	xxxRxx_S_xxxxxx
M0R4F8	1469	S	xxxxRR_S_xxxxxx
Q80U96	391	S	xxxxxx_S_Pxxxxx
Q9EQZ1	125	T	xxxxPx_T_Pxxxxx
D4A987	1416	S	xxxxRR_S_xxxxxx
D3ZQ51	560	S	xxxKRx_S_xxxxxx
Q5XII5	476	S	xxxxxx_S_xDExEx
D4AAV0	47	S	Kxxxxx_S_Pxxxxx
B0BN78	256	S	xxxxxE_S_Dxxxxx
M0RCS9	89	S	xxxxRx_S_xxxxxx
Q56R17	60	S	xxxxxD_S_DxDxxx
F1LVK0	878	S	xxxxxx_S_PxRxxx
F7ENE7	148	S	xxxxxx_S_PPxxxx
A0A0G2JY69	35	S	xxKxxx_S_Pxxxxx
F1M1X9	401	S	xxxxPx_S_Pxxxxx
G3V7T0	21	S	xxxxxx_S_xxxEDx
Q3KR97	261	S	xxxxxx_S_PxxxRx
F1M286	229	S	xxxxxx_S_PxRxxx
D3ZSY8	644	S	xxxSxx_S_xxxxxx
D3ZH46	1044	S	xxRxxx_S_Pxxxxx
Q9WVE9	970	S	xxxxSx_S_xDxxxx
D3ZGQ8	669	S	xxxxxx_S_PxxxRx
A0A0G2K1Q9	595	T	xxxRxx_T_xxxxxx
Q641X2	306	S	xxxxxx_S_DxExxx
A0A0G2KA27	1251	S	xxxxxx_S_xEDxxx
A0A0G2JU73	1062	S	xxxxxx_S_PPxxxx
G3V9C6	1172	T	xxxxxx_T_DxExxx
A0A0H2UHF9	294	S	xxxxxx_S_PxRxxx
F1LM19	313	S	xxxxxx_S_xESxxx
D3ZZZ9	252	S	xxxxxx_S_xxDxxx
D3ZJR1	366	T	xxxxxx_T_Pxxxxx
D3ZYJ5	731	T	xxxxxx_T_DxDxxx
P34926	1622	S	xxxxxx_S_PxRxxx
A0A0G2K5Z1	1541	S	xxxRSx_S_xxxxxx
D4A3D6	80	S	xxxxRx_S_Pxxxxx
Q925G1	389	T	xxxGxx_T_Pxxxxx
Q9JJM7	191	S	xxxRxx_S_xxxxxx
F1LPS7	234	S	xxxRxx_S_xxxxxx
F1LPP8	545	S	xxxxPx_S_Pxxxxx
M0R9T2	292	T	xxxRxx_T_Pxxxxx
Q63259	772	S	xxxxxx_S_Pxxxxx
E9PSN4	209	S	xxxxxx_S_PxRxxx
F1M324	987	S	xxxxRR_S_xxxxxx
E9PTG5	988	S	xxExxx_S_xxEExx
D4A732	307	S	xxxxPx_S_Pxxxxx
D3ZKX8	611	S	xxxxxx_S_xExxEx
D3Z7Z5	459	S	xxxxxx_S_xxxSPx
D4A4L4	158	S	xxxxSx_S_xxxxxx
Q66HD3	688	T	xxxRxx_T_xxxxxx
F1SW39	122	T	xxxxxx_T_DxExxx
A0A0G2K2M9	1815	T	xxxRxx_T_xxxxxx
O08629	52	S	xxxxxx_S_Pxxxxx
D3ZIP3	700	S	xxxKRx_S_xxxxxx
Q63433	778	T	xxxRxx_T_xxxxxx
D4AE79	182	S	xxxxxx_S_xEDxxx
Q2PS20	462	S	xxxxxx_S_PxxxxR
D3ZBL2	201	S	xxxGxx_S_Pxxxxx
D3ZJU5	329	S	xxxxxx_S_PPxxxx
F1MAQ5	685	S	xxxxSx_S_xxxxxx
B3DMA1	337	S	xxxGxx_S_Pxxxxx
Q3ZB99	1132	S	xxxxxx_S_DxExEx
Q9QYM0	505	S	xxxxxx_S_xxxSPx
A0A0G2K6R1	357	S	xxxxPx_S_Pxxxxx
Q6XLI7	424	S	xxxRSx_S_Pxxxxx
Q499S9	11	S	RxxSxx_S_xxxxxx
A0A0G2K2E5	281	S	xxxRRx_S_xxxxxx
B5DFL3	41	S	xxxxxx_S_xDxxxx
A0A0G2K1Z2	211	S	xxxxxD_S_Exxxxx
D4AE80	162	S	xxRxxx_S_Pxxxxx
P34926	1985	S	xExxxx_S_Pxxxxx
D3ZNS1	405	S	xxxRPx_S_Pxxxxx
D3ZBT9	617	S	xxxxxx_S_DEExxx
Q9WU49	41	S	xxxxxx_S_PxxxRR
Q9Z1Z9	96	T	xxxxxx_T_PPxxxx
D4A0U3	381	S	xxxxxx_S_PxxxxK
A0A0G2K5C8	606	S	xxxxPx_S_Pxxxxx
B2GV05	78	S	xxxxxx_S_xxDxxx
F1M7S3	115	S	xxxxxx_S_xxExxx
M0R3M4	21	S	xxxxxx_S_PRxxxx
A2RRU1	728	S	xxxxPx_S_Pxxxxx
F1M388	702	S	xxxRxx_S_Pxxxxx
D3Z858	500	S	xxxxxx_S_PxRxxx
Q6MG88	37	S	xxxxPx_S_Pxxxxx
P54645	527	S	xxxxxx_S_xxxSPx
D4A9L5	544	S	xxxxPx_S_Pxxxxx
A0A0G2KAX9	196	S	xxxxxx_S_Pxxxxx
D3ZF26	423	S	xxxRRx_S_xxxxxx
D2XV59	12	S	xRxxxx_S_Pxxxxx
A0A0G2JW85	809	S	xxxRxx_S_xExxxx
A0A0G2K8Q4	443	S	xxxRRx_S_xxxxxx
A0A0G2JZY6	210	S	xxxxxx_S_xDxxxE
A0A0G2JY75	223	S	xxxxPx_S_Pxxxxx
A1L1J6	57	S	xKxxxx_S_Pxxxxx
D3ZQQ2	828	S	xxxxxx_S_PPxxxx
D3ZWG2	203	S	xxxxRx_S_xxxxxx
Q5EB62	61	S	xxxGxx_S_Pxxxxx
D3ZAY8	346	S	xxxxxx_S_DxExxx
B5DF51	128	S	xLxKxx_S_xxxxxx
P15205	541	S	xxxRxx_S_xxSxxx
G3V792	111	S	xxxxxG_S_xDxxxx
E9PU10	4	S	xxxxxx_S_xPxxxx
D4ACP5	492	S	xxxxxG_S_xDxxxx
Q4R1A4	198	S	xxxxxx_S_xxxEDx
Q6MG75	131	S	xxxxRx_S_xxxxxx
G3V6U8	251	S	Rxxxxx_S_xxxxxx
D4A997	631	S	xxxxxx_S_ExExxx
A0A0G2JWE3	280	S	xxxxxx_S_DxExxx
D3ZR50	1198	T	xxxxPx_T_Pxxxxx
A0A0G2K613	148	T	xxxxxx_T_Pxxxxx
A0A0H2UHK0	78	S	xxxRxx_S_xPxxxx
A0A0G2K1A8	309	S	xxxRRx_S_xxxxxx
G3V650	2116	T	xxxxPx_T_Pxxxxx
Q2KN99	888	S	xxxxRH_S_xxxxxx
M0RDT1	14	T	xxxRRx_T_xxxxxx
F1LRI7	622	T	xxxxxx_T_PPxxxx
O35552	490	S	xxxRRx_S_xxxxxx
A0A0G2JZY6	2084	S	xxxxxx_S_PRxxxx
F1LPM3	1113	S	xxxxSx_S_xDxxxx
A0A0G2KA75	64	S	xxxRPx_S_Pxxxxx
Q80X08	1060	S	xxxxxx_S_Pxxxxx
A0A0G2JVQ2	19	S	Kxxxxx_S_Pxxxxx
R9PXX6	1180	S	xxxxxx_S_PKxxxx
D4A4Z9	174	S	xxxxxG_S_xxxxxx
Q5RKH1	437	S	xxxxxx_S_PxRxxx
F1LTE0	404	S	xxxxxx_S_PKxxxx
D4A9T0	358	S	xxxRxx_S_xPxxxx
O35314	187	T	xxxxxx_T_EExxxx
D3Z898	277	S	xxxxPx_S_Pxxxxx
A0A0G2K4G0	1330	S	xxxxPx_S_Pxxxxx
D4ABH1	433	S	xxxSxx_S_xxxxxx
Q5XI29	194	T	xxxGxx_T_Pxxxxx
A0A0G2K1Q9	917	T	xxxxxx_T_Pxxxxx
A0A0G2JW88	522	S	xKxxxx_S_Pxxxxx
A0A0G2K4G0	665	S	xxxKxx_S_Pxxxxx
F1M9C0	304	T	xxxxPx_T_Pxxxxx
D3ZFK5	150	S	xxxxxx_S_xDxxxx
A0A0G2K5M6	1514	T	xxxxxx_T_DxExxx
D4A317	1281	S	xxxRSx_S_xxxxxx
A0A140TAG3	93	S	xxxxxx_S_xEExxx
B2RYB3	778	S	xxxxxx_S_PSxxxx
Q68FP1	557	T	xxxGxx_T_Pxxxxx
G3V8L3	458	S	xxxxxx_S_xEDxxx
O35147	113	S	xRxRxx_S_xxxxxx
F1LUC0	549	S	xxxxPx_S_Pxxxxx
F1M842	663	S	xxExxx_S_xxEExx
A0A0G2K2M9	1691	S	xxxxxx_S_PxxxxK
A0A0G2K2M9	1690	S	xxxxxx_S_xxExxx
P29066	412	S	xxxGxx_S_Pxxxxx
D4AE96	1020	S	xxxxxx_S_xPxxxx
A0A0G2JYF7	648	S	xxxDxx_S_xxSxxx
Q62991	298	S	xxxxxx_S_PxxxRx
F1M3W5	423	S	xxxxxx_S_xDxxxE
Q9Z136	595	S	xxxRxx_S_xxSxxx
A0A0G2K2C6	1842	S	xxxxxx_S_PSxxxx
Q6AZ35	95	S	xxxxxG_S_xDxxxx
D3ZGQ8	270	S	xxxRKx_S_xxxxxx
F1M2K6	1136	S	xxxxxx_S_xEDxxx
A0A0G2QC02	242	S	xxxxxx_S_PSxxxx
A0A0G2JZY3	340	S	xxxxPx_S_Pxxxxx
P68101	185	T	xxxRxx_T_Pxxxxx
M0RAP6	970	S	xxxxPx_S_Pxxxxx
A0A1W2Q6K2	8	S	xxxxxD_S_DxDxxx
D4AD05	1838	S	xxxxxx_S_PPxxxx
Q04931	657	S	xxxRxx_S_xxxxxx
M0R3K6	30	S	xxxxxx_S_xxExxx
B5DFJ0	427	S	xxxxPx_S_Pxxxxx
D3ZSV8	1084	S	xxxxxx_S_xPxxxx
A0A0G2JZK9	72	S	xxxKxx_S_xxxxxx
A0JPJ0	136	S	xxxKxx_S_xPxxxx
Q5EBC7	187	S	xxxxxx_S_xxxSPx
B5DFI2	235	S	xxxxxx_S_xDxxxx
Q3KRF2	35	S	xxxxxE_S_Dxxxxx
F1LQZ3	470	S	xxxxxx_S_xxExxx
B2RZD1	17	S	xxxxxx_S_PxKxxx
F1LU78	218	S	xxxxPx_S_Pxxxxx
G3V826	327	S	xxxxxx_S_xDxxxx
Q6AYK2	38	S	xxxxPx_S_Pxxxxx
D4AD82	975	S	xxxRxx_S_Pxxxxx
G3V6W5	289	S	xxxxxG_S_xxDxxx
A0A0U1RRZ5	898	S	xxxxxx_S_xxExxx
Q5RKH1	24	S	xxxxxx_S_xxExxx
P15205	1382	S	xxxxxx_S_Pxxxxx
D3ZL45	42	S	xxxxxx_S_Pxxxxx
P15205	1778	S	xxxxxx_S_PxxxRx
F1MA89	21	S	xxxxxx_S_xxExxx
Q5U2M9	246	S	xxxxPx_S_Pxxxxx
G3V704	265	S	xxxxPx_S_Pxxxxx
A0A0G2K2M9	1501	S	RxxSxx_S_xExxxx
C0HL12	1253	S	xxxKRx_S_xxxxxx
D3ZWB4	225	S	xxxRSx_S_xDxxxx
D4AB66	278	S	xRxRxx_S_xxxxxx
G3V790	699	S	xxxxxx_S_xxDxxx
A0A0H2UHV1	1168	S	xxxxxx_S_xDxxxE
M0RDF1	252	S	xxxRRx_S_xxxxxx
D3Z9K8	30	S	xxxRSx_S_xxxxxx
D4AD05	262	S	xxxRxx_S_xxxxxx
A0A0G2KB28	202	S	xxxxxx_S_Pxxxxx
F1MAQ5	286	T	xxxxPx_T_Pxxxxx
P10362	108	S	xxxxxx_S_EDExxx
D3ZGN7	1165	S	Kxxxxx_S_Pxxxxx
B5DFC8	166	S	xxxxxx_S_xDxxxE
D4A2G4	271	S	xxxxxD_S_Dxxxxx
D3ZLP9	879	T	xxxxxx_T_DxExxx
Q4W1H3	1296	S	xxxxPx_S_Pxxxxx
F1M2E9	139	S	xxxxxx_S_xEExxx
G3V7R4	281	S	xExxxx_S_Pxxxxx
D3ZLC1	441	T	xxxRxx_T_xxxxxx
E9PSU1	296	S	xxxxxx_S_DxExxx
G3V7E6	1769	S	xxxxxx_S_DxEExx
Q64542	1112	S	xxxxxx_S_xxDxxx
Q5U201	101	S	xxxxRx_S_xxxxxx
P84100	189	S	xxxxxx_S_xEExxx
A0A0G2JZI9	1087	T	xxxxxx_T_PPxxxx
F1M2B7	233	S	xRxRxx_S_xxxxxx
Q9QY02	518	S	xxxRxx_S_xPxxxx
Q9WU74	375	S	xxxRxx_S_xxxxxx
D4A6X3	637	T	xxxxxx_T_PPxxxx
Q63624	520	S	xxxxPx_S_Pxxxxx
P60881	28	S	xxxSxx_S_xxxxxx
Q5RKI6	135	S	xxxxxG_S_xxxxxx
M0RBB2	100	S	xxxRKx_S_xxxxxx
E9PSN4	925	S	xxxxxx_S_xDxxxE
P10362	75	S	xxRxxx_S_Pxxxxx
G3V6A8	614	S	xxxxxx_S_Pxxxxx
D3ZTA8	243	S	xxxxxx_S_DEExxx
G3V953	862	S	xxxxxx_S_PxRxxx
D3ZE17	820	S	xxxRPx_S_Pxxxxx
E9PST5	482	S	RxxSxx_S_xxxxxx
P31000	72	S	xxxRxx_S_xxxxxx
A0A0G2K0V8	83	S	xxxxxG_S_xDxxxx
A0A096MJX5	15	S	xxxxxD_S_ExExxx
F8WFR8	39	S	xxxxxG_S_xxxxxx
G3V6Y7	125	S	xxxxxx_S_PKxxxx
P08721	170	T	xxxxxx_T_DxDxxx
Q80X08	870	S	xxxxxG_S_xxxxxx
F1M547	1145	S	xxxRxx_S_xDxxxx
F1M1Y0	103	S	xxxxxx_S_xSExEx
Q5XI74	25	S	xxxRKx_S_xxxxxx
A0A0G2K2G1	176	S	xxxxRx_S_Pxxxxx
G3V8Q9	2087	S	xxxRPx_S_xxxxxx
F1LNL2	59	S	xxxxPx_S_Pxxxxx
Q3LRZ1	456	S	xxxxxx_S_PTxxxx
O54880	168	T	xxxxxx_T_Pxxxxx
G3V8F3	404	S	xxRRxx_S_xxxxxx
D3ZNS1	579	S	xxxRKx_S_xxxxxx
D4A208	427	S	xxxSxx_S_xxxxxx
D3ZAS2	229	S	xxxKRx_S_xxxxxx
D3ZVL1	568	S	xxxxxx_S_PPxxxx
D3ZF26	1448	S	xxxxRx_S_xxxxxx
Q6URK4	116	S	xxxRxx_S_xxxxxx
A0A0G2K8Q2	29	S	xxxxxx_S_ExExxx
D3ZQX1	46	S	xxxRRx_S_xxxxxx
A0A140TAG3	897	S	xxxxxx_S_PPxxxx
D3ZS69	2033	S	xxxxxx_S_DEDxxx
B1WC33	138	S	xLxKxx_S_xxxxxx
D3ZG48	39	S	xxxRxx_S_xSExxx
A0A1W2Q6J4	47	S	xxxxxx_S_ExExxx
M0RC54	482	S	xxxxxx_S_xSDxEx
Q6AXN8	291	S	xxxxxx_S_EEExxx
B2GV05	59	S	xxxxxx_S_PxRxxx
E9PSX7	490	S	xxxxxx_S_DxExxx
B2RYB3	389	S	xxRxSx_S_xxxxxx
Q5PQS6	32	S	xxxxxx_S_xPxxxx
D3ZU96	605	S	xxxxxx_S_xEExxx
D4A997	7	S	xxxxxx_S_xxDxxx
Q5I034	238	S	xxxxxG_S_xxxxxx
A0A0G2K2M9	452	S	xxxxxx_S_xPxxxx
D4A005	375	S	xxxxSx_S_xxDxxx
D4AAI9	1851	T	xxxxxx_T_DxDxxx
D3ZC56	5404	S	Kxxxxx_S_xxDxxx
F1LPB5	147	S	xxxKxx_S_xPxxxx
D4ABT8	163	T	xxxGxx_T_Pxxxxx
D4A3U5	2745	S	xxKxxx_S_Pxxxxx
P49793	1069	T	xxxxxR_T_Pxxxxx
Q9JJH5	469	S	xxxRRx_S_xxxxxx
Q6DGF2	234	S	xxxxxx_S_DEExxx
F1MAK1	532	S	xxxxxx_S_DxExEx
D3ZEH1	4656	S	xxxxxx_S_PxxxxR
Q5PPG5	287	S	xxxxSx_S_xxxxxx
D3ZHV2	1376	S	xRxRxx_S_xxxxxx
A0A0G2K1S0	214	S	xxxxxx_S_PKxxxx
M0R3M4	2125	S	xxxxxx_S_xPxxxx
G3V8Q8	736	S	Kxxxxx_S_Pxxxxx
A0A0G2JSR7	596	S	xxxRKx_S_xxxxxx
M0RA52	333	S	xxxxxx_S_PxKxxx
F1LRV4	76	S	xxxRxx_S_xPxxxx
D4AAG8	1974	S	xxxxxx_S_PKxxxx
D4AEG3	393	S	xxxxxx_S_xExExE
A0A1W2Q6B4	170	S	xxxxSx_S_xDxxxx
A0A0G2K2M8	373	S	RxxSxx_S_xxxxxx
Q1EG89	83	S	xxxxPx_S_Pxxxxx
Q4W1H3	1679	S	xxxRRx_S_xxxxxx
O35986	153	S	xxxxxx_S_EGExxx
F1LW74	16	S	xRxRxx_S_xxxxxx
D4A3S6	575	S	xxxRxx_S_xExxxx
F1MAQ5	880	S	xxxxxx_S_PxxxxE
A0A0G2JZ04	218	S	xxxKRx_S_xxxxxx
E9PT37	1192	S	xxxxxx_S_PxRxxx
D3ZQK5	341	S	xxxxxx_S_PxxxxR
F1M2K6	1099	S	xxxxxx_S_PxRxxx
A0A0G2QC19	302	S	xxxxxx_S_xExExx
Q08013	105	S	xxxRKx_S_xxxxxx
G3V8N8	304	S	xxxxxD_S_Dxxxxx
D3ZXK3	2211	S	xxxxPx_S_Pxxxxx
P84060	524	S	Kxxxxx_S_Pxxxxx
A0A0G2K2M9	1374	S	xxxRxx_S_xExxxx
D3ZMM2	17	S	xxxRPx_S_Pxxxxx
D4A4V3	91	S	xxxRRx_S_xxxxxx
A0A0G2QC38	396	S	Kxxxxx_S_Pxxxxx
A0A0G2K2M9	2058	S	xxxxxG_S_xxxxxx
D3ZGZ4	380	S	xxxKRx_S_xxxxxx
Q6PCU4	54	S	xxxxSx_S_xxxxxx
P15178	249	S	xxxxxx_S_Pxxxxx
D3Z9J7	528	S	xxxRxx_S_xPxxxx
F1M3G7	1630	S	xxxxxx_S_xExxEx
Q6AYK1	157	S	xxxRxx_S_PxPxxx
D3ZN76	489	S	xxxxPx_S_Pxxxxx
A0A0G2K0X9	803	S	xxxxRx_S_xxxxxx
P34926	666	S	xxxxxx_S_DEExxx
A0A140TAI8	37	S	xxxxxx_S_xDDExx
F1LSR2	625	S	xxxxxx_S_xExxxx
D3ZTZ1	686	S	xxxxxx_S_PRxxxx
Q5XIW8	392	S	xxxxxx_S_xEExxx
F1M1Y0	247	T	xxxxxx_T_PPxxxx
B2GUY9	237	S	xxxxxx_S_PTxxxx
B0BMS8	20	S	xxxRxx_S_xxxxxx
G3V9S3	240	S	xxxxSx_S_xxxxxx
M0R9T2	1156	S	xxxxxx_S_PRxxxx
D3ZNH2	111	S	xxxxxx_S_xDSxxE
O70187	284	S	xExxxx_S_Pxxxxx
F1MAQ5	1207	S	xLxKxx_S_xxxxxx
G3V927	714	T	xxxRRx_T_xxxxxx
M0R6E6	615	S	xxxxxx_S_xDxxxE
D3ZCH1	562	S	xxKxxx_S_Pxxxxx
G3V826	136	S	xxxRKx_S_xDxxxx
Q8CIR5	279	S	xxxRxx_S_Pxxxxx
Q5U4F0	177	S	xxRxxx_S_Pxxxxx
F1LP04	41	S	xxxxxx_S_DxExxx
Q9Z0W5	343	S	xxxxxG_S_xxxxxx
F1LZ43	90	S	xxxRxx_S_xxxxEx
A0A0G2K8E6	176	S	xxxxxx_S_xxDxxx
B1WC25	260	S	xxxRxx_S_PxPxxx
Q5FVC5	401	T	xxxxPx_T_PKxxxx
Q7TQ84	117	S	xxRxxx_S_Pxxxxx
Q497A9	46	T	xxxxxx_T_Pxxxxx
F1LMK8	616	S	xxxxxx_S_PPxxxx
M0R9R0	989	S	xxxxxx_S_xxExxx
B5DEG7	394	S	xxxxPx_S_Pxxxxx
F1M1X9	386	S	xxxxxx_S_Pxxxxx
Q7TP44	13	S	xxxRRx_S_xxxxxx
D4A6U4	771	S	xxxRxx_S_xxSxxx
B2RYX0	166	S	xxxxxx_S_EEExxx
Q9Z0G8	150	S	xxxxPx_S_Pxxxxx
Q9Z0W5	346	S	xxxxxx_S_xDxxxx
D3ZXX7	237	S	xxxxxx_S_xEDxxx
M0R567	645	S	xxRxxx_S_Pxxxxx
A0A0G2JVD6	2318	S	xxxxxx_S_PPxxxx
A0A0G2K9C8	693	S	xxxRxx_S_xxxxxE
F1LY69	190	S	xxxRKx_S_xxxxxx
Q5RKH1	427	S	xxxxxx_S_xxxSPx
Q9JID1	94	S	xxxxPx_S_Pxxxxx
D3ZAZ5	383	S	xxxRRx_S_xxxxxx
F1LQS1	441	S	xxRxxx_S_Pxxxxx
A0A0H2UHQ9	134	S	xxxRSx_S_xxxxxx
F1LSH1	502	S	xKxxxx_S_Pxxxxx
Q5XIU9	110	T	xxxxxR_T_Pxxxxx
F1M0L3	914	S	xxxSxx_S_xxxxxx
D3ZHV2	3488	S	xxxRKx_S_xxxxxx
B5DEG7	183	S	Kxxxxx_S_Pxxxxx
D4A3S6	564	S	xxxxPx_S_Pxxxxx
A0A096MKI6	570	S	xxxxxx_S_DDExxx
E9PTG5	389	S	xxxxxx_S_xxDxxx
Q921A2	629	S	xxxxxx_S_xxDxxx
Q3MJK5	677	S	xxxxxx_S_PPxxxx
D3ZRE8	362	S	xxxxxx_S_EEExxx
D3Z7Z5	588	S	xxxxxx_S_xxDxxx
D3ZN95	1849	S	xxxxxx_S_DDDxxx
A0A0G2JZM8	808	S	xxxxxx_S_DxEExx
D3ZHX3	35	S	xxxxRx_S_xxxxxx
Q5RKI5	436	S	xxxRKx_S_xxxxxx
Q91Y81	218	S	xxxxxx_S_DEDxxx
D3ZBH5	576	S	xxxxxx_S_xxxSPx
G3V7W3	740	S	xxxxxx_S_PxxxxK
F1M589	508	S	xxxxRx_S_xxxxxx
D3ZF86	800	S	xxxxxG_S_xxxxxx
A0A0G2JWE3	309	S	xxxxxD_S_ExExxx
Q5M9I6	242	S	xxxRxx_S_xxSxxx
D3ZAR1	197	S	xxxRRx_S_xxxxxx
E9PTR3	301	S	xxxRSx_S_xxxxxx
A0A0G2K2V4	465	S	xxxxxx_S_PxRxxx
F1LSM8	1272	S	xxxxSx_S_xDxxxx
Q62920	137	S	xxxxxx_S_PKxxxx
Q6AYN4	15	S	xxxxPx_S_Pxxxxx
D3ZCE5	408	S	xxxRRx_S_xxxxxx
D3ZCT5	87	S	xxxxRx_S_xxxxxx
F1LV13	488	S	xxxxxx_S_xDxxxx
Q5I0H5	337	S	xxxxPx_S_Pxxxxx
A0A0G2K808	653	S	xxxxxx_S_DDDxxx
P15205	1250	S	xxxxxx_S_xxxSPx
F1MA87	319	S	xxxxxx_S_xxExxx
D4A069	161	S	xxxRxx_S_xExxxx
A0A0G2K2M9	962	S	xxxxxx_S_xxxSPx
E9PSJ4	293	T	xxxGxx_T_Pxxxxx
F1LM64	434	S	Kxxxxx_S_xxDxxx
Q5XIM8	923	S	xxxxSx_S_xxxxxx
Q6MG08	197	S	xxxxxD_S_ExExxx
D3ZGQ8	608	S	Kxxxxx_S_Pxxxxx
D3ZN76	1237	T	xxxxxx_T_Pxxxxx
Q9WVE9	315	S	xxxRSx_S_xxxxxx
D3Z8L5	709	S	xxxRRx_S_xxxxxx
Q99P99	563	S	xxxxxx_S_EEExxx
A0A0H2UHS9	647	S	xRxRxx_S_xxxxxx
A0A0G2JVD6	1815	S	xxxxxx_S_DxExxx
B5DF62	257	S	xxxGxx_S_Pxxxxx
F1LVK0	4160	S	xxxxxx_S_xExxxx
F1MAL5	676	S	xxxxPx_S_Pxxxxx
M0RBT5	236	S	xxxxxx_S_xxExxx
Q63625	1175	S	xxxRSx_S_Pxxxxx
A0A0G2JSH4	25	S	xxxxxG_S_xxxxxx
D3ZU63	556	S	xxxxRx_S_xxxxxx
A0A0U1RRV0	88	S	xxxxxD_S_ExExxx
D4ACA6	647	T	xxxxxx_T_PPxxxx
D4A0U3	514	S	xxxxxR_S_xSPxxx
F1LVG9	103	T	xxxxxx_T_PPxxxx
Q63803	1102	S	xxxxxx_S_xDGxxx
G3V9D1	460	S	xxxxxx_S_DEDxxx
F7F1Y3	170	S	xxxxxx_S_DxExxx
D3ZJD2	1284	S	xxxxRH_S_xxxxxx
F7ENH8	394	S	xxxxxx_S_xDxxxE
Q2KN99	869	S	xxxxPx_S_Pxxxxx
O08719	373	S	xxxxxG_S_xxDxxx
F1M4M5	808	S	xxxxxx_S_xxxEDx
D4ACF1	564	S	xxxxxx_S_PPxxxx
D4A3X0	1379	S	xxxxRx_S_xxxxxx
A0A0G2K1P1	595	S	xxxRSx_S_xxxxxx
A0A0G2K242	1170	T	xxxxxx_T_Pxxxxx
D3ZK16	255	S	xxxxSx_S_xxxxxx
D3ZI49	143	S	xxxxxx_S_xExxEx
F1LQ34	342	S	xxxRxx_S_xDxxxx
B2RYP3	355	S	xxxxxx_S_xEDxxx
A0A0U1RRW6	269	S	xxxxxx_S_PxxxxK
B1H224	160	S	Kxxxxx_S_Pxxxxx
D4A421	351	S	xxxxxx_S_Pxxxxx
Q66H48	710	S	xxxxxx_S_PxxxRx
P15205	988	S	xxxxxx_S_xDxxxE
D3ZF21	330	T	xxxxxx_T_SPxxxx
D4A5A6	1864	S	xxxxPx_S_Pxxxxx
F1M9A7	10	S	xxxRRx_S_xxxxxx
A0A0G2JUP9	376	S	xxxxxx_S_DxEExx
D4A1V8	1171	S	xxxxxx_S_xExxxx
Q5PPG5	352	S	xxxxxx_S_xExExx
Q157S1	120	S	xxxRxx_S_xDxxxx
F1M0H0	242	S	xxxxPx_S_Pxxxxx
F1M1X9	384	S	xxxGxx_S_Pxxxxx
O54861	819	S	xxxxxx_S_DEDxxx
D3ZN39	604	S	xxxRxx_S_xExxxx
D3ZM69	87	S	xLxKxx_S_xxxxxx
M0R991	269	S	xxxRxx_S_Pxxxxx
F1M5G8	1581	S	xLxKxx_S_xxxxxx
Q5PPJ4	3	T	xxxxxx_T_xxxxEx
M0RBD3	939	S	xxxRRx_S_xxxxxx
G3V650	1927	T	xxxxPx_T_PKxxxx
A0A0G2JWS3	1633	S	xRxRxx_S_xxxxxx
Q4V8E1	135	S	xxxxxx_S_PxxxxR
G3V6Z1	35	S	xxxxxx_S_xxDxxx
A0A0G2K5M6	820	S	xExxxx_S_Pxxxxx
Q63475	384	S	xxxxRx_S_xxxxxx
Q8CJ99	656	S	xxxRRx_S_xxxxxx
P84060	528	S	xxxxxx_S_PTxxxx
A0A0G2JTG7	63	S	xxxxxx_S_EDExxx
D3ZSY0	1256	S	xxxRSx_S_xxxxxx
M0R5T5	1271	T	xxxRxx_T_xxxxxx
B4F7F3	333	S	xxxxxG_S_xxxxxx
D3ZGK0	131	S	xxxxPx_S_Pxxxxx
F1M0E7	216	S	xxxxxx_S_xDxxxx
A0A0G2JUM6	398	S	xxxxPx_S_Pxxxxx
Q66HC5	364	S	xxxxxx_S_PxxxxK
A0A0G2K1Q9	594	S	xxxKRx_S_xxxxxx
Q9JMD2	764	S	xxxxxx_S_DxExxx
F1M3W5	1153	S	xxxxSx_S_xxxxxx
Q3ZB99	966	S	xxxRxx_S_PxPxxx
Q66H19	215	S	xxxxPx_S_Pxxxxx
A0A0G2JTV2	294	S	xxxRxx_S_xDxxxx
F1M771	241	S	xxxxRx_S_xxxxxx
D3ZN76	395	S	xxxxxG_S_xxxxxx
Q63572	542	S	xxxxxx_S_xPxxxx
A2RRU2	17	S	xxxRRx_S_xxxxxx
E9PT37	1057	S	xxxxxx_S_xEDxxx
D3ZPH3	363	S	xExxxx_S_Pxxxxx
D3ZHV9	255	S	xxxRxx_S_Pxxxxx
D3ZKR9	747	S	xxxxxx_S_DxExxx
P24594	123	T	xxxxxx_T_xxxxEx
A0A0G2K0D3	85	S	xxxRxx_S_xDxxxx
E9PSN4	920	S	RxxSxx_S_xxxxxx
A0A0G2JWE3	459	S	xxxxSx_S_xDxxxx
D3ZHP7	464	S	xxxxSx_S_xxxxxx
D3Z8E0	577	T	xxxxxx_T_Pxxxxx
A0A096MJL2	180	S	xxxRPx_S_xxxxxx
F1LR60	249	S	xxxxxE_S_Dxxxxx
D4A5G2	146	S	xxxxxx_S_xSDxEx
A0A1W2Q678	685	S	xxxxxG_S_xxxxxx
D3ZCI2	327	S	xxxRxx_S_xSExxx
F1M2K6	272	S	xxxRxx_S_Pxxxxx
O88791	99	S	xxxxxx_S_xxExxx
F1M4A4	1354	S	xxxxxx_S_PxxxRR
A0A0G2JTU9	204	S	xxxxxx_S_PxRxxx
Q5M7V8	248	S	xxxRxx_S_Pxxxxx
F1LVW4	297	S	xxxRRx_S_xxxxxx
B2RYB3	657	S	xxxxxx_S_PxxxxK
E9PSX7	246	S	xxxxxD_S_xxExxx
O35821	1166	S	xxxxxx_S_PxxxxR
F1M842	785	S	xxxxSx_S_xxxxxx
D3ZUV9	299	S	xxxxxx_S_PxKxxx
A0A096MKC0	594	S	xxxxPx_S_Pxxxxx
D4AAH9	468	S	xxxxSx_S_xxDxxx
D4A652	309	S	xxxKRx_S_xxxxxx
D4A3V4	150	S	xxxRxx_S_xExxxx
D3ZGK0	82	S	xxxxPx_S_Pxxxxx
D3ZYK9	150	S	xxxxxx_S_xDExEx
D4A0U3	560	S	xxxxxx_S_PxxxxK
D4A3Z4	378	S	xxxxxx_S_xDEExx
D4ACN6	123	S	xxxxxG_S_xxxxxx
D4A3V7	352	S	xxxRPx_S_Pxxxxx
Q5XIB5	124	S	xxxxxx_S_PTxxxx
B5DF09	108	S	xxxxxx_S_DxExEx
A0A0G2JVW5	3924	T	xxxxPx_T_Pxxxxx
D3ZQ89	684	S	xxxxRx_S_Pxxxxx
D4A3G2	740	T	xxxxxx_T_SPxxxx
D4A1Q2	480	S	xxxxPx_S_Pxxxxx
D3ZKB7	944	S	xxxRxx_S_xxxxxx
Q4V898	326	S	xxxxRx_S_xxxxxx
G3V8F3	375	S	xxxxxx_S_PPxxxx
D3ZSQ1	1955	S	xExxxx_S_Pxxxxx
Q8K3X0	10	S	xxxxxx_S_xDxxxE
D4A9H6	367	S	xxxxxx_S_Pxxxxx
A0A0G2JXU8	722	S	xxxxxx_S_xDxxxx
D4AEB3	999	S	xxxxxx_S_DDExxx
D3ZJS6	678	S	xxxxxx_S_DxExxx
D4AD05	1300	S	xxxxxG_S_xDxxxx
Q5U1W8	87	S	xxxxxx_S_EEExxx
P15205	527	T	xxxxxx_T_PPxxxx
F1LRC7	593	S	xxxxPx_S_Pxxxxx
A0A0G2JZE4	7	S	xxxxxx_S_PRxxxx
Q5I0I1	488	S	xxxxxG_S_xxxxxx
M0RBK3	123	S	xxxRSx_S_xxxxxx
A0A0G2K070	640	S	xxxxxD_S_Dxxxxx
F1M842	860	S	xxxxxx_S_Pxxxxx
F1LU18	1032	S	xxxxxx_S_PPxxxx
F1MAA1	890	S	xxxxxx_S_PxxxRx
P15205	1393	S	xxxxxx_S_PPxxxx
A0A0G2JVD0	257	S	xxxxxx_S_PxxxxK
Q5U2Y6	210	S	xxxxxD_S_ExExxx
F1LT49	292	S	xxxRRx_S_xxxxxx
Q6AZ35	121	S	xxxxxx_S_xxDxxx
G3V9H8	697	S	xxxRRx_S_xxxxxx
A0A0G2JU89	362	S	xxxRxx_S_xxSxxx
P10362	325	S	xxxxxG_S_xxxxxx
D3ZV54	897	T	xxxxxD_T_xxxxxx
F1LUD4	194	S	xxxRxx_S_xxxxxE
G3V8Q9	1357	S	xxxGxx_S_Pxxxxx
B1H245	152	S	xxxxxx_S_Exxxxx
A0A0G2K5D3	1181	S	xxxKxx_S_Pxxxxx
A0A0G2JU89	2735	T	xxxRxx_T_Pxxxxx
D4AB33	71	S	xxxRxx_S_xPxxxx
Q5U2T9	8	S	xxxxxx_S_xxExxx
G3V8Q9	2771	S	xxxxxx_S_PSxxxx
P34926	1029	S	xxxxxx_S_PxxxxE
G3V779	19	T	xxxRxx_T_xxxxxx
D4A659	330	S	xxxRxx_S_PxPxxx
F1LN42	1145	S	xxxxxx_S_PPxxxx
P61314	34	S	xxxRxx_S_xxxxxx
F1MA86	72	S	xxxxxx_S_PPxxxx
D4A582	1850	S	xxxxxx_S_PxxxxK
M0R440	101	S	xxxxxG_S_xxxxxx
Q63099	19	S	xxxSxx_S_xxxxxx
Q4W1H3	1357	S	xxxRRx_S_xxxxxx
D3ZEZ9	567	S	xxxRKx_S_xDxxxx
Q63540	749	S	xxxRRx_S_xxxxxx
Q4FZU4	842	S	xxxxxG_S_xxxxxx
A0A0G2JTF2	950	S	xxxxxx_S_PxxxxR
A0A0U1RRV0	175	S	xxxxxx_S_xExExx
D4A5D4	1167	S	xxxxxx_S_PPxxRx
F1M3G7	2647	S	xxxRxx_S_xxxxxx
M0RC17	1141	S	xxxxxD_S_Dxxxxx
M0RD40	493	S	xxxRRx_S_xxxxxx
F1M8I9	331	S	xxxxxG_S_xxxxxx
F1MAQ5	307	S	xxKxxx_S_Pxxxxx
F1M062	467	S	xxxxxx_S_DxExxx
A0A0A0MY14	23	S	xxxxxG_S_xxxxxx
D4A554	550	T	xxxRxx_T_Pxxxxx
F1LW30	36	S	xxxxxx_S_xExxxx
P54842	315	S	xxxxxx_S_PSxxxx
Q80W98	297	S	xxxRSx_S_xxxxxx
F1LV40	149	S	xxxxSx_S_xDxxxx
Q5QD51	1466	S	xxxxxx_S_EEExxx
G3V7Q4	726	S	xxxxxx_S_PxxxxK
A0A0G2K5A4	939	S	xxxxxG_S_xxxxxx
B5DF98	175	S	xxxxxx_S_xPxxxx
D4A2J9	1141	S	xxxRKx_S_xDxxxx
A0A0G2JSR7	211	S	xxxSxx_S_xxxxxx
B1H245	148	S	xxxxxx_S_xPxxxx
B1WBZ1	287	S	xxxxxx_S_PPxxxx
F1LTT8	136	S	xxxxxx_S_PxRxxx
A0A0G2K2M9	233	T	xxxRxx_T_Pxxxxx
A0A0G2KAJ5	273	S	Kxxxxx_S_Pxxxxx
O88763	244	S	Kxxxxx_S_Pxxxxx
A0A0G2K4S1	355	S	xxxRxx_S_xDxxxx
Q3S4A5	330	S	xxxxxx_S_PSxxxx
Q5I034	170	S	xxxxxx_S_xEDxxx
G3V8L3	637	S	xxxxxG_S_xxDxxx
B2RYJ1	480	T	xxxxxx_T_xxxxEx
Z4YNN0	14	S	xxxxxx_S_PxRxxx
Q6AY96	389	T	xxxxPx_T_Pxxxxx
A0A0H2UHZ2	125	S	xxxxxx_S_ExExxx
A0A1W2Q695	259	S	xxxxxx_S_DxExxx
G3V8L3	390	S	xExxxx_S_Pxxxxx
A0A0G2K1Z2	229	T	xxxRxx_T_PPxxxx
D3ZU20	155	S	xxxxxx_S_xExxxx
A0A0G2JZZ3	18	S	xxxxxx_S_xExExx
Q66HE8	60	S	xxxxxx_S_EDExxx
Q5M947	229	S	xxxxxx_S_PKxxxx
A0A0G2JZK9	85	S	xxxSxx_S_xxxxxx
A0A0G2K0V4	369	S	xxxxSx_S_xDxxxx
A0A0G2K5Z1	1563	S	xxxRxx_S_xxSxxx
Q63624	925	T	xxxxxx_T_PPxxxx
F1M4U9	819	S	xxxxPx_S_Pxxxxx
G3V953	985	T	xxxxxx_T_Pxxxxx
D4A417	135	T	xxxxPx_T_Pxxxxx
F1M1X9	1147	T	xxxxPx_T_Pxxxxx
F1LXQ7	1439	S	xxxxSx_S_xDxxxx
A0A0G2K5A4	60	S	xxxxxx_S_PxRxxx
D3ZZZ0	1080	S	xxxxxx_S_PKxxxx
D3ZMG0	494	S	xxxRKx_S_xxxxxx
F1M8D5	29	S	xxxRSx_S_xxxxxx
P08721	236	S	xxxxxx_S_xESxxx
B1WC79	419	S	xxxxxG_S_xxDxxx
D3ZGN7	687	S	xxxxxx_S_EEExxx
F1M3W5	2639	S	xxxRKx_S_xxxxxx
Q4KM38	129	S	xxxRRx_S_xxxxxx
D3ZRG3	627	S	xxxxxx_S_PSxxxx
A0A0G2K6Z8	987	S	xxxRxx_S_xDxxxx
E9PSN4	700	S	xxxRPx_S_Pxxxxx
D3ZSX2	477	S	xxxxxx_S_xxDxxx
A0A0G2JTB7	590	S	xxxxSx_S_xxDxxx
B2RYB3	718	S	xxRxxx_S_Pxxxxx
F1M7S0	1015	S	xxxxRH_S_xxxxxx
Q63099	488	S	xxxxxx_S_PxRxxx
A0A0G2JTU9	1666	S	xxxxPx_S_Pxxxxx
P34926	2635	S	xExxxx_S_Pxxxxx
A0A0G2K0V4	841	S	xxxRxx_S_xxSxxx
A0A0G2K6R8	1443	S	xxxxxG_S_xxxxxx
F1M0Y6	351	T	xxxxxx_T_Pxxxxx
A0A0G2K2M9	774	S	xxxRSx_S_xxxxxx
M0RDY6	577	S	xxxxxx_S_PPxxxx
P84586	163	T	xxxxxx_T_Pxxxxx
A0A0G2JZ88	1203	S	xxxxxG_S_Pxxxxx
D3Z881	579	S	xxxxxx_S_xExxxx
Q9Z1Z9	111	S	xxxxSx_S_xxxxxx
F1M965	590	S	xxxxxx_S_xPxxxx
A5I9F0	856	S	xxxGxx_S_Pxxxxx
P15205	1513	S	xxxxxx_S_xxExxx
B5DFE0	106	S	xxxxxx_S_PPxxxx
Q5BJP1	41	S	xxxxxx_S_PPxxxx
D3ZAZ5	370	S	xxxRxx_S_xPxxxx
A0A0G2JY17	143	S	xxxRSx_S_xxxxxx
A0A0H2UI34	651	S	xxxxxx_S_PxxxxK
A0A0G2K867	225	S	xxxSxx_S_xxxxxx
F1M3D2	393	S	xxxxxx_S_xEExxx
Q3MJK5	332	S	xxxRRx_S_xxxxxx
D4A0I5	564	S	xxxxxx_S_xxxSPx
A0A0G2K2M9	1998	S	xxxRKx_S_xxxxxx
M0RBT5	53	S	xxxxxx_S_xxDxxx
Q7TP54	123	S	xxxRSx_S_xxxxxx
D4AB50	710	S	xxxxRx_S_Pxxxxx
F1M4M5	1193	S	xExxxx_S_Pxxxxx
Q5XID1	182	S	xLxKxx_S_xxxxxx
D3Z8N9	1109	S	xxKxxx_S_Pxxxxx
A0A140TAG3	906	S	xxxxxx_S_PxRxxx
A0A0G2JV49	766	S	xxxxSx_S_xxxxxx
Q5U2N3	287	T	xxxxxx_T_Pxxxxx
M0R5A9	526	S	xExxxx_S_Pxxxxx
Q5U2P5	619	S	xxxxxx_S_Exxxxx
D3ZJK8	9	S	xxxxxx_S_Exxxxx
Q9ESZ0	487	T	xxxxxD_T_xxxxxx
Q5FVT1	463	S	xxxxxx_S_xEDxxx
D3ZR79	329	S	xxxxxx_S_PxxxRx
A0A0G2JTD1	358	T	xxxxxx_T_Pxxxxx
B2RZ69	168	S	xxxxxD_S_xxExxx
A0A0G2K5D3	1194	S	xxxxxx_S_xEExxx
F1LSH1	304	S	xxxRPx_S_Pxxxxx
F1LR10	371	S	xxxxxx_S_xPxxxx
F1M816	1845	S	xxxxxx_S_PxKxxx
A0A0G2K2M9	1480	S	xxxxxx_S_xxExxx
M0RDF7	97	S	xxxxxx_S_DEExxx
D3ZYR1	495	S	xxxxxx_S_PPxxxx
Q5XI38	5	S	xxxxxx_S_xSDxEx
O88989	242	S	xxxKxx_S_xxxxxx
P38983	43	S	xxxKRx_S_xxxxxx
P15205	1369	S	xxxxRx_S_xxxxxx
G3V7V7	526	S	xxxxxx_S_PTxxxx
F1M3W5	434	S	xxxxxx_S_xEExxx
D4AEC2	450	S	xxxRSx_S_xxxxxx
O35052	41	T	xxxxxx_T_DxDxxx
A0A0G2K104	493	S	xxxxxx_S_PxKxxx
F1LNC7	772	S	xxxxxx_S_PxKxxx
A0A0G2K2M9	1811	S	xxxRKx_S_xxxxxx
A0A0G2JZX3	30	S	xxxxxx_S_xExxxx
D4A3Q2	926	S	xxxxRx_S_xxxxxx
F1M0J7	319	S	xxxxxG_S_xxxxxx
D3ZAL7	453	S	xxxxPx_S_Pxxxxx
D4A899	1812	S	xxxxxD_S_ExExxx
A0A0G2JV09	468	S	xxxxxx_S_EDExxx
M0R3M4	2121	S	xxxxxx_S_Pxxxxx
A0A0H2UHL8	277	S	xxxxxx_S_PxxxxK
F1LM19	309	S	xxRxxx_S_Pxxxxx
Q641X2	289	S	xxxxxx_S_DxExEx
A0A0G2K0Q7	1812	T	xxxxxx_T_SPxxxx
F1LN42	794	S	xxxRSx_S_xxxxxx
D3ZWB4	560	S	xxxRPx_S_xxxxxx
P54645	490	T	xxxGxx_T_Pxxxxx
F1M241	537	S	xxxxxE_S_Dxxxxx
D3ZKX8	628	S	xxxxxD_S_xxExxx
A0A0G2K2C6	401	S	xxxxPx_S_Pxxxxx
A0A0G2JZF2	208	S	xxxSxx_S_xxxxxx
D3ZJD2	1187	S	xxxRSx_S_xDxxxx
D4A9V4	218	S	xxxxxx_S_PPxxxx
F1M4J1	1009	S	xxxxxD_S_Dxxxxx
F1LPM7	169	S	xxxSxx_S_xxxxxx
F1M8R0	517	S	xxxxPx_S_Pxxxxx
B2RYJ1	328	S	xxxRPx_S_Pxxxxx
Q499S4	557	S	xxxxxx_S_PxKxxx
Q4W1H3	1259	S	xxxRxx_S_xDxxxx
F1LQM8	6	S	xxxRRx_S_xxxxxx
D3Z9Z0	781	T	xxxxxx_T_Pxxxxx
D3ZWA5	58	S	xxxRRx_S_xxxxxx
D3ZHX6	234	S	xxxxSx_S_xDxxxx
D3ZMD3	927	S	xxxRRx_S_xxxxxx
D3ZRG3	637	S	xxxxxx_S_PKxxxx
P35465	115	S	xxxxxx_S_Exxxxx
D3ZCH1	1297	S	xxxRRx_S_xxxxxx
G3V6G6	199	S	xxxxxx_S_Exxxxx
A0A0H2UHC3	148	S	xxxxxx_S_PPxxxx
A0A1W2Q6I3	140	S	xxxxxx_S_xESxxx
D4A8C1	454	S	xxxRxx_S_Pxxxxx
P34926	690	S	xExxxx_S_Pxxxxx
F1MA61	210	S	xxxxxD_S_ExExxx
A0A0U1RRZ5	378	S	xxKxxx_S_Pxxxxx
G3V9T6	272	S	xxxxxx_S_xDDExx
P50503	155	S	xxxKRx_S_xxxxxx
Q04931	672	S	xxxxxx_S_xxExxx
Q63014	615	S	xxxxSx_S_xxxxxx
Q5PQM2	565	S	xxxxRR_S_xxxxxx
A0A0G2K7X3	61	S	xxxxxD_S_Exxxxx
D3ZP45	161	S	xxxxxx_S_xxDxxx
F1LY08	263	S	xxxRKx_S_xxxxxx
A0A0G2K930	72	S	xxxRxx_S_xxxxxx
A0A0G2K6R9	1967	S	xxxxPx_S_Pxxxxx
Q568Z0	16	S	xxxxxx_S_DxExxx
P34058	452	S	xxxRRx_S_xxxxxx
D3ZX40	508	S	xxxxxx_S_PPxxRx
D3ZTF0	468	S	xxxRxx_S_xExxxx
A0A0G2JUR5	1752	S	xxxxPx_S_Pxxxxx
Q6S3A0	2778	S	xxxxxx_S_xExExE
D3ZU00	431	S	xxxxxx_S_xDxxxx
Q5U312	249	T	xxxxxx_T_PTxxxx
D3ZYT8	319	S	xxxRSx_S_xxxxxx
D3ZRG7	127	S	xxxxxx_S_PPxxxx
P06536	134	S	xxxxxx_S_xxExxx
D3ZWJ2	288	S	xxxxxx_S_Exxxxx
D3ZKX8	373	T	xxxxxx_T_xxxxEx
G3V7E6	1434	S	xxxxxx_S_xExExE
B2RYB3	578	T	xxxRxx_T_PPxxxx
G3V704	307	S	xxKxxx_S_Pxxxxx
Q6AXS5	234	S	xxxxxx_S_PxxxxK
A0A0G2K2F4	164	S	xxxRSx_S_xxxxxx
D4A5X1	716	S	xxxRxx_S_xPxxxx
D3ZJ01	143	T	xxxxxx_T_PPxxxx
Q63768	74	S	xxxxPx_S_Pxxxxx
G3V9G5	1047	S	xxxxPx_S_Pxxxxx
Q9QXY2	1021	S	xxxRRx_S_xxxxxx
A0A0G2K5W1	1167	T	xxxRxx_T_xxxxxx
A0A096MJ27	214	S	xxxxxx_S_DxExxx
M0R462	284	S	xxxxxx_S_PxxxxK
B2RYP3	671	S	xxxRKx_S_xxxxxx
A0A0G2JZM8	1224	S	xxxxxx_S_PRxxxx
Q9JKL8	709	S	xxRxxx_S_Pxxxxx
D4AEC2	402	S	xxxRSx_S_xxxxxx
Q4V889	163	S	xxxRRx_S_xxxxxx
F1SW39	105	S	xxxxxx_S_xDxxxE
D3ZRU9	1081	S	xxxxxx_S_PxKxxx
F7ESX8	177	S	xxxRPx_S_xxxxxx
Q9JM80	346	S	xxxxSx_S_xxDxxx
D4A8M4	320	S	xxxKRx_S_xxxxxx
D3ZQH1	551	S	xxxRSx_S_xxxxxx
D4AC16	231	S	xxRxSx_S_xxxxxx
A0A0G2KAW2	286	S	xxxKRx_S_xxxxxx
A0A0G2JXT9	611	S	xxxRPx_S_Pxxxxx
F1M801	530	T	xxxxPx_T_Pxxxxx
Q4KLK7	543	S	xxExxx_S_xxEExx
D3ZMM2	392	S	xxxRxx_S_Pxxxxx
D4A8Q2	870	S	xxxxxx_S_PPxxxx
D4A3F5	347	S	xxxxxG_S_xxxxxx
G3V662	339	S	xxxxxx_S_Pxxxxx
B4F7C1	471	S	xxxxxx_S_PPxxxx
A0A0G2KB10	518	S	xxxxxx_S_PPxxxx
A0A0G2K3J4	896	S	xxxxxx_S_xDxxxx
A0A0G2K2M9	1481	S	RxxSxx_S_xExxxx
Q566D8	583	S	xxxxxx_S_xxxEDx
A0A0G2K5Z4	203	S	xxxxxx_S_PTxxxx
O08773	218	S	xxxxxx_S_xPxxxx
Q6P0K8	182	S	xRxxxx_S_Pxxxxx
D3ZS88	713	S	xxxxPx_S_Pxxxxx
D4A4R8	823	S	xRxRxx_S_xxxxxx
F1LW69	521	S	xxxxxR_S_xSPxxx
D3ZP87	237	T	xxxxxx_T_xxxxEx
A0A0G2K2M9	955	T	xxxxxx_T_Pxxxxx
D4A4K4	735	S	xxxxxx_S_xEExxx
F1M2D4	331	S	xxxRxx_S_xDxxxx
Q68FX7	327	T	xxxRRx_T_xxxxxx
D4A9D8	65	S	xxxxxx_S_xESxxx
A0A0G2JVK8	533	S	xxxxxx_S_PxxxxK
Q63625	817	S	xxxxxx_S_PxxxxK
A0A0G2K2M9	1555	S	xxxxRx_S_xxxxxx
P54287	152	S	xxxxxx_S_PPxxxx
Q3SWS9	470	T	xxxxPx_T_Pxxxxx
F1LNP8	434	S	xxxxxx_S_xExExE
D4A017	479	S	xxxxxx_S_xEDxxx
D3ZQ68	312	S	xxxxxx_S_PExxxx
A0A0G2K2M9	504	S	xxxxxR_S_xSPxxx
A0A0G2KAW2	1712	S	xxxxxx_S_PxxxxK
A0A0G2KB52	224	S	xxRxSx_S_xxxxxx
G3V8V4	349	S	xxxxxx_S_EGExxx
D3ZZZ9	268	S	xxxxxG_S_xxDxxx
P02091	53	S	xxxxSx_S_xxxxxx
A0A0G2JZG4	628	S	xxxSxx_S_xxxxxx
F1LM43	640	S	xxxxPx_S_Pxxxxx
A0A0G2K2M9	1478	S	xxxRSx_S_xxxxxx
M0RCM7	871	S	xxxxxx_S_DxExxx
Q5FVQ2	238	S	xxxxxx_S_xSExEx
Q6MG75	115	S	xxxRSx_S_xDxxxx
D3ZSY8	135	T	xxxxPx_T_Pxxxxx
Q920Q0	244	S	xxxxxx_S_Exxxxx
G3V9H6	512	S	xxRRxx_S_xxxxxx
G3V6A2	87	S	xxxRRx_S_xxxxxx
Q5XIS3	47	S	xxxxxx_S_PxxxRx
D4A206	568	S	xxxxxx_S_PxKxxx
D3Z992	172	S	xxxxxx_S_PRxxxx
A4L691	233	S	xxxxxx_S_PxxxxK
A0A1P0PBZ6	2446	S	xxxxPx_S_Pxxxxx
A0A0G2K613	104	S	xxxSxx_S_xxxxxx
A0A0G2JZ38	523	S	xxxxPx_S_Pxxxxx
D3ZC82	375	S	xxxxxx_S_PTxxxx
A0A0G2JZ79	347	S	xxxxxx_S_xxExxx
D4A554	1188	S	xxxRxx_S_xDxxxx
D3ZIK8	741	S	xxxxxx_S_PPxxxx
A0A0G2K9M8	1174	S	xRxRxx_S_xxxxxx
F1LXF1	8	S	xxxRKx_S_xxxxxx
A0A0G2JUE4	41	S	xRxRxx_S_xxxxxx
D4AE02	263	S	xKxxxx_S_Pxxxxx
D4A2M3	165	S	xxxxRx_S_xxxxxx
D3ZKC6	2865	S	RxxSxx_S_xxxxxx
O35314	285	S	Rxxxxx_S_xxxxxx
A0A0G2K2M9	1451	T	xxxxPx_T_Pxxxxx
E9PTE1	1968	S	xxxRRx_S_xxxxxx
Q5U306	284	S	Kxxxxx_S_Pxxxxx
G3V6J2	81	S	xxxxSx_S_xDxxxx
G3V888	481	S	xxxxxx_S_PRxxxx
Q9JLU4	1135	S	xxxxxx_S_PxxxRx
A0A0G2JXT9	43	S	xxxRRx_S_xxxxxx
P34926	2600	S	xxxGxx_S_Pxxxxx
D4A060	16	S	xxxxxx_S_xxDxxx
D4ACZ5	305	S	RxxSxx_S_xxxxxx
A0A0G2K8Q4	154	S	xxKxxx_S_Pxxxxx
D3ZFK6	287	S	xxxxRR_S_xxxxxx
G3V8Z3	6	S	xxxxxx_S_PPxxxx
G3V798	179	S	xxxxxG_S_xxxxxx
D3ZJG8	1087	S	xxxGxx_S_Pxxxxx
A0A0G2KAV8	241	S	xxxKxx_S_xDxxxx
M0R961	182	S	xxKxxx_S_Pxxxxx
G3V984	1084	S	xRxRxx_S_xxxxxx
D4A5R3	1394	S	xxxxxx_S_PxxxxK
Q4KM45	26	S	xxxxxG_S_xxxxxx
Q5EBC7	180	S	xxxxxG_S_xxxxxx
D3ZRK0	841	S	xxxxxx_S_PPxxxx
B2RZD1	13	S	xxxxxx_S_xxxSPx
G3V779	359	S	xxxxxx_S_PTxxxx
F1M0L3	1715	S	xxxxPx_S_Pxxxxx
Q07936	19	T	xxxxxx_T_PPxxxx
F1MAL5	574	S	xRxRxx_S_xxxxxx
D3ZVK3	477	S	xxxxxx_S_PKxxxx
A0A0G2K2M9	1652	S	RxxSxx_S_xxxxxx
Q3S4A5	335	S	xxxxSx_S_xxxxxx
Q66H43	201	T	xxxRRx_T_xxxxxx
A0A0G2K7X3	73	S	xxxxxx_S_xxxEDx
G3V897	1037	S	xxxxRx_S_xxxxxx
G3V6W5	1024	S	xxxxxx_S_DEDxxx
A0A0G2K5V4	2093	S	xxxRSx_S_xxxxxx
D3ZG21	1794	T	xxxxxx_T_DxExxx
Q3MJK5	302	S	xxxRSx_S_Pxxxxx
G3V6G6	274	S	xxxxxx_S_xxDxxx
A0A0G2JZM8	255	S	xxxRxx_S_xxSxxx
E9PSN4	1271	S	xxxRxx_S_Pxxxxx
D4AAV4	710	S	xxxRRx_S_xxxxxx
G3V6G6	204	S	xxxSxx_S_xxxxxx
D3ZUY8	653	T	xxxxxx_T_Pxxxxx
F1LPQ9	850	S	xxxRRx_S_xxxxxx
D3ZVF2	823	S	xxxxPx_S_Pxxxxx
F1M981	934	S	xxKxxx_S_Pxxxxx
A4GW50	282	S	Rxxxxx_S_xxxxxx
D3ZQH1	549	S	xxxRRx_S_xxxxxx
F1LYG2	229	S	xxxxxG_S_xxxxxx
D3ZXX3	1108	S	xxxRRx_S_xxxxxx
D3ZI68	450	S	Rxxxxx_S_xxxxxx
Q6AY75	83	S	xxxxPx_S_Pxxxxx
F1M8A4	437	S	xxxxxG_S_xxxxxx
D4A3Z4	129	S	xxxxSx_S_xxDxxx
D4A3T0	1261	S	xxxxxx_S_PPxxxx
P15205	1870	S	xxxxxx_S_xxxSPx
D4AAI7	96	T	xxxxxx_T_DxDxxx
G3V9L7	548	S	xxxRRx_S_xxxxxx
F1LP21	92	S	xxxxSx_S_xxDxxx
D3ZJ01	186	S	xxxxxx_S_xDxxxx
D4A0D9	963	S	xKxxxx_S_Pxxxxx
D4ADE4	593	S	xxxGxx_S_Pxxxxx
A0A0G2KA69	266	S	xxxxxG_S_xxxxxx
F1LPM3	254	S	xLxKxx_S_xxxxxx
F1M6T3	1114	S	xxxxxx_S_PxxxRx
G3V8Q9	1435	T	xxxRxx_T_PPxxxx
G3V9X2	490	S	xxxxxx_S_xDEExx
G3V714	139	S	xxxxxx_S_xExxxx
D3ZAG3	23	S	xxxKRx_S_xxxxxx
A0A1W2Q6J4	51	S	xxxxxx_S_xDGxxx
Q6TRW4	1182	S	xxxxxx_S_ExExxx
Q2THW6	335	S	xxxRxx_S_xxSxxx
D4ACW0	743	S	xxxRxx_S_xDxxxx
F1LWN1	351	S	xxKxxx_S_Pxxxxx
D4ADT3	81	S	xxxxxx_S_xPxxxx
G3V9R8	226	S	xxxxxx_S_EEExxx
A0A0G2JWD2	430	S	xxxSxx_S_xxxxxx
D3ZQL6	632	S	xxxRxx_S_Pxxxxx
D3ZXT1	631	S	xxxxxx_S_xDxxxE
D4A553	176	S	xxxxxx_S_DxEExx
Q68FY4	434	S	xKxxxx_S_Pxxxxx
A0A0G2K4H8	260	S	xxxRxx_S_Pxxxxx
Q5QD51	1571	S	xxxxxx_S_PxRxxx
Q3MJK5	422	S	xxxxxx_S_PxxxxK
M0RDF1	761	S	xxxKRx_S_xxxxxx
P85973	33	S	xxxxxG_S_xxxxxx
Q5FVC5	424	S	xxxxxx_S_PxKxxx
D3ZAS2	232	S	xxxxSx_S_xDxxxx
M0R757	175	S	xxxKxx_S_xxxxxx
Q66HK4	281	S	xxxRxx_S_xxSxxx
D3ZKH2	996	S	xxxxxD_S_xxExxx
A0A0G2JSY8	256	S	xxxxPx_S_Pxxxxx
Q5CZZ9	413	S	xxKRxx_S_xxxxxx
[truncated: 11,364 more rows]
