# Supplementary material for: Integrative Proteomics and Phosphoproteomics Analysis of the Rat Adenohypophysis after GnRH Treatment
Source: Int J Mol Sci. 2023 Feb 7;24(4):3339. doi: 10.3390/ijms24043339 (PMC9961725; doi:10.3390/ijms24043339)
Supplement: Supplementary file 1 [file ijms-24-03339-s001.zip › Table S3 Transcription factors.xlsx]

## Sheet: Identified_TF_count
TF Family	Animal_TFDB	Proteome	Phosphoproteome	Both	Animal_TFDB_prot	Proteome_prot	Phosphoproteome_prot	Both_prot
bHLH	102	14	16	6	Bhlhe41;Myf6;Hes7;Arnt2;Mesp2;Id4;Twist2;Usf2;Id1;Bhlhe40;Figla;Tcf4;Tcf3;Tfec;Tfe3;Npas2;Twist1;Usf3;Olig3;Bhlha15;Mlxip;Ahr;Scx;Hes1;Ascl2;Olig2;Tcf12;Sim1;Ascl4;Tcfl5;Ascl5;Arnt;Mxi1;Clock;Msgn1;Max;Mesp1;Hey1;Ascl1;Ferd3l;Myc;Atoh7;Atoh1;Atoh8;Mxd1;Npas1;Sohlh1;Tcf21;Neurog2;Hand2;Sim2;Msc;Lyl1;Hes5;Tcf24;Mxd4;Myf5;Arntl2;Mlx;Hes3;Bhlhe23;Bhlha9;Tcf23;Olig1;Ncoa1;Neurod1;Rab24;Nhlh2;Hey2;Nhlh…	Myf6;Arnt2;Usf2;Tcf3;Tfe3;Npas2;Tcf12;Max;Ncoa1;Rab24;Srebf2;Mnt;Arntl;Usf1	Bhlhe41;Usf2;Tcf4;Tcf3;Tfe3;Tcf12;Arnt;Clock;Myc;Ncoa1;Mitf;Tfap4;Heyl;Tfeb;Arntl;Neurod4	Usf2;Tcf3;Tfe3;Tcf12;Ncoa1;Arntl
Homeobox	222	16	17	10	Gbx2;Nkx6-2;Rhox5;LOC100361016;Evx2;Nanog;LOC103689922;Hdx;Six5;Phox2b;En2;Otp;Phox2a;Lhx4;LOC691272;Rhox11;Hmx1;Zfhx2;Hoxa13;Mixl1;Adnp;LOC100912608;Cdx1;Hoxa6;Isx;AABR07002623.1;Cdx4;Hesx1;Zfhx4;Barx2;LOC103689929;Hoxb13;Nkx6-3;Pitx2;Hoxa11;Hoxa9;Pdx1;Hlx;Dlx5;Six4;Cdx2;Emx2;En1;Lmx1a;NEWGENE_1310011;Hoxd13;Hmx3;AABR07056503.1;Lhx3;Nkx3-2;Hoxc12;Tgif1;Hoxa2;Tlx1;AABR07059679.1;Zhx3;Uncx;Nkx2-6;…	Adnp;Pitx2;Zhx3;Pbx3;Prop1;Six3;Pknox1;Pbx1;Six1;Pitx1;Zfhx3;Zhx1;Meis1;Zhx2;Lmx1b;Six6	Six5;Adnp;Zfhx4;Pitx2;Prop1;Msx1;Pitx3;Pknox1;Pbx2;Pitx1;Mnx1;Zfhx3;Zhx1;Meis1;Zhx2;Hmbox1;Six6	Adnp;Pitx2;Prop1;Pknox1;Pitx1;Zfhx3;Zhx1;Meis1;Zhx2;Six6
zf-C2H2	476	66	85	34	Zfp420;Gfi1b;Zfp445;Gli3;Klf9;Zfp709;AABR07035107.1;RGD1566386;Zfp182;Zfp687;Zfp523;Zscan2;Zfp872;Zfp799;AABR07002885.1;Prdm10;Zfp763;LOC103690163;Rreb1;AABR07001099.1;Zfp536;Bnc2;Prdm13;Zfp324;AABR07005779.3;AABR07025825.1;LOC102554913;Zfp93;AABR07003056.1;Klf13;Zfp579;AABR07002868.1;Wt1;Prdm12;AABR07001926.1;Ovol3;Zfp300;LOC102555377;Zfp358;Klf8;Zfp317;LOC100909856;LOC102555083;Zfp788;Zfp52;Zfp…	Zfp687;Zfp579;Zfp358;Zfp668;Zfp267;Zfp455;Zfp236;Zfp354c;Zfp512;Znf768;Yy1;Zfp143;Zscan22;Zfp771;Zfp958;Vezf1;Repin1;Gli2;Egr1;Zscan21;Zfp708;Zfp266;Zfp637;Zfp91;Zfp512b;Zfp9;Maz;Zfp612;LOC100911196;Sp4;Zfp319;Zfp62;Sp2;Zfp41;Ctcf;Zfp219;Sp1;Zfp800;Wiz;Zfp787;Peg3;Zfp871;Znf48;Zfp618;Zfp644;Zfp292;Zfp516;Zscan26;Zfp869;Zfp483;Dnajc21;Zfp46;Znf740;Ikzf5;Zfp180;Trerf1;Ikzf3;Zfp777;Zfp275;Zfx;Zfp868…	Gli3;Zfp687;Prdm10;Rreb1;Zfp536;Zfp358;Zkscan8;Zfp707l1;Zfp354c;Zfp532;Znf768;Zfp691;Yy1;Zkscan4;Zfp580;Vezf1;Repin1;Gli2;Zfp212;Aebp2;Zeb2;Zscan21;Zfp637;Zfp91;Glis2;Zfp189;Hic1;Zfp397;Sp4;Hivep1;Zfp827;Zfp3;Scrt1;Zfp263;Prdm2;Zfpm1;Zfp423;Zfp219;Ikzf4;Sp1;Hivep3;Zfp800;Wiz;Rlf;Peg3;Tshz1;Zfp329;Zfp444;Zfp407;Znf48;Zkscan7;LOC102556967;Zfp618;Zfp644;Bcl11a;Zfp292;E4f1;Zfp516;Klf12;Zfp276;Zfp483;…	Zfp687;Zfp358;Zfp354c;Znf768;Yy1;Vezf1;Repin1;Gli2;Zscan21;Zfp637;Zfp91;Sp4;Zfp219;Sp1;Zfp800;Wiz;Peg3;Znf48;Zfp618;Zfp644;Zfp292;Zfp516;Zfp483;Dnajc21;Znf740;Zfp180;Trerf1;Zfp777;Zfp275;Zfx;Zkscan1;Zfp362;Zkscan3;Zfp592
ZBTB	49	12	18	6	Zbtb42;Zbtb12;Zbtb8a;Zbtb45;Zbtb47;Zbtb1;Zbtb21;Zbtb2;Zbtb17;LOC100912068;Hic2;Zbtb33;Zbtb34;Zbtb38;Zbtb24;Zbtb7c;Zbtb3;Zbtb6;Zbtb20;Zbtb39;Zbtb32;Zbtb11;Zbtb16;Zfp161;Zbtb49;Zbtb7b;Zbtb44;Mynn;Zbtb10;Zbtb46;Zbtb18;Zbtb26;Zbtb48;Patz1;Bcl6b;Zbtb25;Zbtb22;Zbtb7a;Zfp131;Zbtb37;Zbtb4;Zbtb40;LOC100910807;Zbtb5;Zbtb43;Zbtb41;Bcl6;Zbtb8b;Gzf1	Zbtb45;Zbtb47;Zbtb1;Zbtb21;Zbtb33;Zbtb20;Zbtb11;Zbtb16;Zbtb7b;Patz1;Zbtb7a;Zfp131	Zbtb1;Zbtb21;Zbtb38;Zbtb7c;Zbtb6;Zbtb20;Zbtb11;Zbtb16;Zbtb49;Zbtb44;Mynn;Zbtb18;Zbtb22;Zbtb7a;Zbtb37;Zbtb5;Zbtb43;Gzf1	Zbtb1;Zbtb21;Zbtb20;Zbtb11;Zbtb16;Zbtb7a
AP-2	5	0	0	0	Tfap2a;Tfap2d;Tfap2c;Tfap2e;Tfap2b
MYB	30	16	18	16	Rcor1;Mysm1;Terb1;Snapc4;Tada2b;Mier2;Myb;Smarcc2;LOC102552640;AABR07040266.1;Mier1;Mybl2;Ttf1;Smarca1;Cdc5l;Terf2;Smarca5;Dmtf1;Dnajc1;Rcor3;Tada2a;Zzz3;Mis18bp1;Terf1;Mier3;Dnajc2;Rcor2;Smarcc1;Ncor2;Mybl1	Rcor1;Smarcc2;Mier1;Ttf1;Smarca1;Cdc5l;Terf2;Smarca5;Dnajc1;Rcor3;Zzz3;Terf1;Dnajc2;Rcor2;Smarcc1;Ncor2	Rcor1;Mysm1;Smarcc2;Mier1;Ttf1;Smarca1;Cdc5l;Terf2;Smarca5;Dnajc1;Rcor3;Zzz3;Mis18bp1;Terf1;Dnajc2;Rcor2;Smarcc1;Ncor2	Rcor1;Smarcc2;Mier1;Ttf1;Smarca1;Cdc5l;Terf2;Smarca5;Dnajc1;Rcor3;Zzz3;Terf1;Dnajc2;Rcor2;Smarcc1;Ncor2
RXR-like	12	5	2	2	Nr2f1;Rxrg;Nr2f6;Nr2c1;Rxra;Nr2f2;Rxrb;Hnf4g;Nr2c2;Nr2e1;Hnf4a;Nr2e3	Nr2f6;Rxra;Nr2f2;Rxrb;Nr2c2	Nr2f6;Nr2c2	Nr2f6;Nr2c2
HMG	78	14	12	9	AABR07045786.1;AABR07060287.1;Sox9;Bbx;AABR07029613.1;LOC688583;Sox12;Tox;Hmgxb4;AABR07040480.1;Tox3;AABR07067274.1;Hmgb2;Sox30;Sox8;Hmg20b;LOC691030;Sox11;RGD1559962;LOC108349189;Pbrm1;Sox17;LOC108349258;AABR07040430.1;Prkag1;AABR07009373.1;AC127605.1;Lef1;Sox7;Hmgb4;RGD1566225;Hmgb2l1;Pms1;Hmgxb3;Sox6;Tfam;Nsd2;Sry;Ubtf;Tox2;Hmgb1;Cic;Tox4;AC123471.1;Hmgb3;Ssrp1;Sox5;Tcf7l2;AABR07041586.2;Sox10…	Bbx;Hmgxb4;Hmgb2;LOC108349189;Pbrm1;Tfam;Nsd2;Ubtf;Cic;Tox4;Hmgb3;Ssrp1;Smarce1;Hmg20a	Bbx;Hmgxb4;Pbrm1;Nsd2;Ubtf;Tox2;Cic;Tox4;Ssrp1;Sox5;Hbp1;Hmg20a	Bbx;Hmgxb4;Pbrm1;Nsd2;Ubtf;Cic;Tox4;Ssrp1;Hmg20a
TF_bZIP	52	9	17	5	Nfe2l3;Creb3l1;Cebpg;Batf3;Fosl2;Cebpa;Bach2;Ddit3;Batf;Creb3l4;Atf1;Atf4;Creb1;Jund;Cebpe;Junb;Creb3l3;Atf2;Hlf;Dbp;Creb3l2;Nfil3;Maf;Fosl1;Cebpd;Fos;Fosb;Tef;Crebzf;Creb3;Mafb;Jdp2;Atf6b;Creb5;Jun;Nfe2l1;Atf7;Crem;Atf5;Nfe2l2;Mafa;Batf2;Bach1;Mafg;Maff;Nfe2;Atf6;Cebpb;Xbp1;Atf3;Mafk;Nrl	Creb3l1;Creb1;Jund;Junb;Atf2;Dbp;Nfil3;Atf6;Mafk	Fosl2;Atf1;Creb1;Jund;Junb;Atf2;Dbp;Creb3l2;Cebpd;Fosb;Crebzf;Mafb;Jun;Atf7;Crem;Bach1;Cebpb	Creb1;Jund;Junb;Atf2;Dbp
zf-C2HC	6	2	4	2	Myt1;Myt1l;St18;L3mbtl3;AABR07068728.1;L3mbtl1	Myt1;St18	Myt1;Myt1l;St18;L3mbtl3	Myt1;St18
zf-MIZ	7	5	3	2	LOC103693776;Pias1;Zmiz2;Zmiz1;Pias3;Pias2;Pias4	Pias1;Zmiz2;Zmiz1;Pias3;Pias4	Pias1;Pias3;Pias2	Pias1;Pias3
ETS	28	1	9	0	Etv2;Elk3;Etv1;LOC100910896;Fev;Gabpa;Ets2;Etv3l;Spdef;Etv5;Elk4;Etv4;Ets1;Ehf;Elk1;Erf;Spic;Etv6;Elf1;Elf2;Elf4;Elf3;Spib;Spi1;Fli1;Elf5;Erg;Etv3	Gabpa	Elk3;Ets1;Erf;Etv6;Elf1;Elf2;Elf4;Erg;Etv3
T-box	17	1	3	1	Eomes;Tbx18;Tbx15;Tbxt;Tbx3;Tbx20;Tbx22;Tbr1;Tbx2;Tbx4;Tbx10;Tbx6;Tbx19;Tbx21;Mga;Tbx1;Tbx5	Mga	Tbx2;Mga;Tbx1	Mga
RHD	10	5	5	2	Nfat5;Nfkb2;Rela;Nfatc1;Nfatc2;Nfatc4;Rel;Nfatc3;Nfkb1;Relb	Nfat5;Nfkb2;Rela;Rel;Nfkb1	Nfat5;Rela;Nfatc1;Nfatc2;Nfatc3	Nfat5;Rela
CP2	6	2	0	0	Tfcp2l1;Ubp1;Grhl2;Grhl3;Grhl1;Tfcp2	Ubp1;Tfcp2
Tub	5	2	0	0	Tulp4;Tulp3;Tulp1;Tub;Tulp2	Tulp3;Tub
ARID	11	5	5	4	Arid3c;Arid5a;Arid1a;Arid2;Arid1b;Arid3b;Arid4b;Jarid2;Arid4a;LOC100912163;Arid3a	Arid1a;Arid2;Arid1b;Arid4a;LOC100912163	Arid1a;Arid2;Arid1b;Arid4b;Arid4a	Arid1a;Arid2;Arid1b;Arid4a
Pou	14	2	2	2	Pou2f3;Pou5f1;Pou5f2;Pou4f1;AABR07027925.1;Pou3f3;Pou3f4;Pou6f1;Pou3f2;Pou1f1;Pou2f2;Pou4f3;Pou2f1;Pou4f2	Pou1f1;Pou2f1	Pou1f1;Pou2f1	Pou1f1;Pou2f1
HMGA	3	2	2	2	RGD1564836;Hmga1;Hmga2	Hmga1;Hmga2	Hmga1;Hmga2	Hmga1;Hmga2
Fork_head	39	4	10	3	Foxc1;Foxo1;Foxl2;Foxo4;Foxn1;Foxj2;Foxe3;Foxp4;Foxd2;Foxa1;Foxr1;Foxa3;Foxk2;Foxd1;Foxi1;Foxn3;Foxm1;Foxr2;Foxo6;Foxp2;LOC680273;Foxl1;Foxe1;Foxp1;Foxa2;Foxn4;Foxk1;Foxf1;Foxo3;Foxs1;Foxj3;Foxi2;AABR07006487.1;Foxg1;Foxp3;Foxc2;Foxn2;Foxh1;Foxi3	Foxj2;Foxp1;Foxk1;Foxo3	Foxo1;Foxl2;Foxo4;Foxj2;Foxp4;Foxk2;Foxo6;Foxp1;Foxk1;Foxj3	Foxj2;Foxp1;Foxk1
MBD	9	8	8	8	Mbd1;Setdb1;Setdb2;Mbd4;Mbd3;Mecp2;Mbd2;Baz2b;Baz2a	Mbd1;Setdb1;Setdb2;Mbd3;Mecp2;Mbd2;Baz2b;Baz2a	Mbd1;Setdb1;Setdb2;Mbd3;Mecp2;Mbd2;Baz2b;Baz2a	Mbd1;Setdb1;Setdb2;Mbd3;Mecp2;Mbd2;Baz2b;Baz2a
THR-like	20	2	5	1	Rara;Nr1d1;Nr1i2;Nr1i3;Nr1h2;Thra;Nr1h4;Rora;Ppard;Nr1h5;Vdr;Rorb;Rarb;Rarg;Nr1h3;Ppara;Thrb;Pparg;Rorc;Nr1d2	Nr1d1;Nr1d2	Nr1d1;Thra;Ppard;Rarg;Rorc	Nr1d1
E2F	10	1	2	1	E2f6;E2f8;E2f7;E2f2;Tfdp1;E2f3;E2f5;Tfdp2;E2f1;E2f4	E2f4	E2f6;E2f4	E2f4
MH1	9	4	0	0	Smad5;Smad1;LOC103691556;Smad4;Smad6;Smad7;Smad9;Smad2;Smad3	Smad5;Smad1;Smad4;Smad3
IRF	9	1	3	1	Irf3;Irf1;Irf9;Irf4;Irf5;Irf6;Irf2;Irf7;Irf8	Irf6	Irf3;Irf9;Irf6	Irf6
ESR-like	9	1	2	0	Nr3c2;Esr2;Esrra;Esr1;AABR07031756;Pgr;Ar;Esrrg;Esrrb	Esr1	Nr3c2;Ar
NF-YB	1	0	0	0	Nfyb
DM	8	0	0	0	Dmrt2;LOC100910371;Dmrtc2;Dmrtb1;Dmrta1;Dmrta2;Dmrt1;Dmrt3
CTF/NFI	4	4	4	4	Nfib;Nf1x;Nfic;Nfia	Nfib;Nf1x;Nfic;Nfia	Nfib;Nf1x;Nfic;Nfia	Nfib;Nf1x;Nfic;Nfia
RFX	7	3	4	3	Rfx4;Rfx5;Rfx1;Rfx3;Rfx2;Rfx7;Rfx8	Rfx5;Rfx1;Rfx3	Rfx5;Rfx1;Rfx3;Rfx2	Rfx5;Rfx1;Rfx3
CUT	6	1	1	1	Cux2;Satb2;Cux1;Onecut1;Onecut2;Satb1	Cux1	Cux1	Cux1
Runt	3	0	0	0	Runx3;Runx2;Runx1
GTF2I	3	2	2	2	Gtf2i;LOC100912262;Gtf2ird1	Gtf2i;LOC100912262	Gtf2i;LOC100912262	Gtf2i;LOC100912262
SRF	5	2	4	2	Mef2a;Srf;Mef2c;Mef2d;Mef2b	Mef2a;Mef2d	Mef2a;Srf;Mef2c;Mef2d	Mef2a;Mef2d
Miscellaneous	2	0	0	0	Nr0b2;Nr0b1
NDT80/PhoG	2	0	0	0	Myrfl;Myrf
PAX	8	1	0	0	Pax7;Pax3;Pax6;Pax8;Pax2;Pax4;Pax5;Pax9	Pax6
CG-1	2	0	0	0	Camta1;Camta2
SAND	5	1	1	0	Gmeb2;Sp140;Deaf1;Gmeb1;Sp110	Gmeb2	Sp110
NCU-G1	1	0	0	0	Glmp
TSC22	5	3	2	2	LOC100362783;Tsc22d3;Tsc22d4;Tsc22d1;Tsc22d2	Tsc22d3;Tsc22d4;Tsc22d1	Tsc22d3;Tsc22d1	Tsc22d3;Tsc22d1
TEA	4	0	1	0	Tead1;Tead3;Tead4;Tead2		Tead3
THAP	8	4	2	1	Thap3;Thap2;Thap11;Thap12;Thap7;Thap4;Thap1;Thap6	Thap11;Thap12;Thap4;Thap1	Thap7;Thap4	Thap4
zf-GATA	16	7	8	6	Gata5;Gata3;Gata2;Mta2;Zglp1;Mta3;Rere;Gata6;Gata4;Gatad2a;Gatad1;Gatad2b;Gata1;LOC108348091;Mta1;Trps1	Mta2;Mta3;Rere;Gatad2a;Gatad1;Gatad2b;Mta1	Gata2;Mta2;Mta3;Rere;Gatad2a;Gatad2b;Mta1;Trps1	Mta2;Mta3;Rere;Gatad2a;Gatad2b;Mta1
zf-CCCH	4	1	3	1	Mkrn2;Zfp36l2;Zfp36l1;LOC100911319	Mkrn2	Mkrn2;Zfp36l1;LOC100911319	Mkrn2
TF_Otx	4	0	0	0	LOC100911492;Crx;Otx1;Otx2
CSD	9	5	4	3	Lin28b;Ybx3;Carhsp1;Ybx1-ps3;Ybx2;LOC100364335;Csdc2;Lin28a;Ybx1	Lin28b;Ybx3;Carhsp1;Ybx1-ps3;Csdc2	Ybx3;Carhsp1;Csdc2;Ybx1	Ybx3;Carhsp1;Csdc2
CSL	3	1	0	0	Rbpjl2;Rbpjl;Rbpj	Rbpj
STAT	6	6	4	4	Stat5a;Stat1;Stat6;Stat2;Stat5b;Stat3	Stat5a;Stat1;Stat6;Stat2;Stat5b;Stat3	Stat5a;Stat1;Stat5b;Stat3	Stat5a;Stat1;Stat5b;Stat3
NGFIB-like	3	1	3	1	Nr4a3;Nr4a2;Nr4a1	Nr4a1	Nr4a3;Nr4a2;Nr4a1	Nr4a1
zf-BED	2	0	0	0	Zbed4;RGD1560108
HPD	2	1	1	1	Prox2;Prox1	Prox1	Prox1	Prox1
zf-NF-X1	2	2	2	2	Nfxl1;Nfx1	Nfxl1;Nfx1	Nfxl1;Nfx1	Nfxl1;Nfx1
HTH	1	0	0	0	AABR07006860.1
LRRFIP	2	2	2	2	Lrrfip1;Lrrfip2	Lrrfip1;Lrrfip2	Lrrfip1;Lrrfip2	Lrrfip1;Lrrfip2
DACH	2	1	1	1	Dach1;AABR07039806.1	Dach1	Dach1	Dach1
CSRNP_N	3	0	0	0	Csrnp3;Csrnp1;Csrnp2
GCFC	2	2	2	2	Paxbp1;Gcfc2	Paxbp1;Gcfc2	Paxbp1;Gcfc2	Paxbp1;Gcfc2
COE	4	0	0	0	Ebf2;Ebf3;Ebf4;Ebf1
HSF	4	1	1	1	Hsf4;Hsf1;Hsfy2;Hsf2	Hsf1	Hsf1	Hsf1
AF-4	5	1	1	1	Aff1;Aff4;Aff3;Aff2;LOC499407	Aff4	Aff4	Aff4
P53	4	0	0	0	Tp63;AABR07008242.1;Tp73;Tp53
SF-like	2	0	0	0	Nr5a2;Nr5a1
GCNF-like	1	0	0	0	Nr6a1
NF-YC	1	1	0	0	Nfyc	Nfyc
zf-LITAF-like	3	0	0	0	Cdip1;AC129395.1;Litaf
PC4	1	1	1	1	Sub1	Sub1	Sub1	Sub1
CBF	1	1	0	0	Cbfb	Cbfb
NF-YA	1	1	1	1	Nfya	Nfya	Nfya	Nfya
GCM	2	0	0	0	Gcm2;Gcm1
Nrf1	1	1	0	0	Nrf1	Nrf1
Others	76	38	34	22	Zfp207;Nme2;Blzf1;Rag1;Cebpz;Plek;Myef2;Lyar;Yeats4;Rbck1;Cc2d1a;Crebl2;Preb;Akna;Plscr1;Znfx1;Parp12;Nfrkb;Hif1a;Tax1bp1;Prdm11;Xpa;Cnbp;Elmsan1;Gabpb1;Gpbp1;Spz1;Ciz1;Casz1;Maf1;RGD1306271;Zfp395;Zgpat;Zfp503;Purg;Fam170a;Zfp609;Setbp1;Smarcal1;Tcf25;Carf;Zfp511;Zfp318;Pura;Cpeb1;Phtf1;Capn15;Gon4l;Crebrf;Gabpb2;Epas1;Mllt10;Zfp608;Ahctf1;Tet2;Cenpt;LOC103690173;Ltf;Cenpa;Rfxank;Gpbp1l1;Znf750;…	Zfp207;Nme2;Blzf1;Cebpz;Plek;Myef2;Lyar;Yeats4;Rbck1;Cc2d1a;Preb;Plscr1;Znfx1;Parp12;Tax1bp1;Xpa;Cnbp;Elmsan1;Gabpb1;Zgpat;Tcf25;Zfp511;Zfp318;Pura;Capn15;Zfp608;Ahctf1;Cenpa;Rfxank;Phb;Khsrp;Zfp326;Zfp280d;Purb;Tfb1m;Tmf1;Sfpq;Zfp706	Cebpz;Myef2;Rbck1;Cc2d1a;Parp12;Nfrkb;Tax1bp1;Xpa;Cnbp;Elmsan1;Gpbp1;Ciz1;Maf1;Zgpat;Zfp503;Purg;Zfp609;Tcf25;Zfp318;Pura;Phtf1;Gon4l;Mllt10;Zfp608;Ahctf1;Cenpa;Gpbp1l1;Znf750;Khsrp;Zfp326;Zfp280d;Purb;Tmf1;Sfpq	Cebpz;Myef2;Rbck1;Cc2d1a;Parp12;Tax1bp1;Xpa;Cnbp;Elmsan1;Zgpat;Tcf25;Zfp318;Pura;Zfp608;Ahctf1;Cenpa;Khsrp;Zfp326;Zfp280d;Purb;Tmf1;Sfpq

## Sheet: Diff_TF_count
Family	Animal_TFDB	Proteome	Phosphoproteome	Both	Animal_TFDB_prot	Proteome_prot	Phosphoproteome_prot	Both_prot
bHLH	102	0	0	0	Bhlhe41;Myf6;Hes7;Arnt2;Mesp2;Id4;Twist2;Usf2;Id1;Bhlhe40;Figla;Tcf4;Tcf3;Tfec;Tfe3;Npas2;Twist1;Usf3;Olig3;Bhlha15;Mlxip;Ahr;Scx;Hes1;Ascl2;Olig2;Tcf12;Sim1;Ascl4;Tcfl5;Ascl5;Arnt;Mxi1;Clock;Msgn1;Max;Mesp1;Hey1;Ascl1;Ferd3l;Myc;Atoh7;Atoh1;Atoh8;Mxd1;Npas1;Sohlh1;Tcf21;Neurog2;Hand2;Sim2;Msc;Lyl1;Hes5;Tcf24;Mxd4;Myf5;Arntl2;Mlx;Hes3;Bhlhe23;Bhlha9;Tcf23;Olig1;Ncoa1;Neurod1;Rab24;Nhlh2;Hey2;Nhlh…
Homeobox	222	0	2	0	Gbx2;Nkx6-2;Rhox5;LOC100361016;Evx2;Nanog;LOC103689922;Hdx;Six5;Phox2b;En2;Otp;Phox2a;Lhx4;LOC691272;Rhox11;Hmx1;Zfhx2;Hoxa13;Mixl1;Adnp;LOC100912608;Cdx1;Hoxa6;Isx;AABR07002623.1;Cdx4;Hesx1;Zfhx4;Barx2;LOC103689929;Hoxb13;Nkx6-3;Pitx2;Hoxa11;Hoxa9;Pdx1;Hlx;Dlx5;Six4;Cdx2;Emx2;En1;Lmx1a;NEWGENE_1310011;Hoxd13;Hmx3;AABR07056503.1;Lhx3;Nkx3-2;Hoxc12;Tgif1;Hoxa2;Tlx1;AABR07059679.1;Zhx3;Uncx;Nkx2-6;…		Adnp;Zfhx3
zf-C2H2	476	0	5	0	Zfp420;Gfi1b;Zfp445;Gli3;Klf9;Zfp709;AABR07035107.1;RGD1566386;Zfp182;Zfp687;Zfp523;Zscan2;Zfp872;Zfp799;AABR07002885.1;Prdm10;Zfp763;LOC103690163;Rreb1;AABR07001099.1;Zfp536;Bnc2;Prdm13;Zfp324;AABR07005779.3;AABR07025825.1;LOC102554913;Zfp93;AABR07003056.1;Klf13;Zfp579;AABR07002868.1;Wt1;Prdm12;AABR07001926.1;Ovol3;Zfp300;LOC102555377;Zfp358;Klf8;Zfp317;LOC100909856;LOC102555083;Zfp788;Zfp52;Zfp…		Vezf1;Gli2;Zfp91;Peg3;Zfp516
ZBTB	49	0	1	0	Zbtb42;Zbtb12;Zbtb8a;Zbtb45;Zbtb47;Zbtb1;Zbtb21;Zbtb2;Zbtb17;LOC100912068;Hic2;Zbtb33;Zbtb34;Zbtb38;Zbtb24;Zbtb7c;Zbtb3;Zbtb6;Zbtb20;Zbtb39;Zbtb32;Zbtb11;Zbtb16;Zfp161;Zbtb49;Zbtb7b;Zbtb44;Mynn;Zbtb10;Zbtb46;Zbtb18;Zbtb26;Zbtb48;Patz1;Bcl6b;Zbtb25;Zbtb22;Zbtb7a;Zfp131;Zbtb37;Zbtb4;Zbtb40;LOC100910807;Zbtb5;Zbtb43;Zbtb41;Bcl6;Zbtb8b;Gzf1		Zbtb7a
AP-2	5	0	0	0	Tfap2a;Tfap2d;Tfap2c;Tfap2e;Tfap2b
MYB	30	0	1	0	Rcor1;Mysm1;Terb1;Snapc4;Tada2b;Mier2;Myb;Smarcc2;LOC102552640;AABR07040266.1;Mier1;Mybl2;Ttf1;Smarca1;Cdc5l;Terf2;Smarca5;Dmtf1;Dnajc1;Rcor3;Tada2a;Zzz3;Mis18bp1;Terf1;Mier3;Dnajc2;Rcor2;Smarcc1;Ncor2;Mybl1		Ncor2
RXR-like	12	0	0	0	Nr2f1;Rxrg;Nr2f6;Nr2c1;Rxra;Nr2f2;Rxrb;Hnf4g;Nr2c2;Nr2e1;Hnf4a;Nr2e3
HMG	78	0	3	0	AABR07045786.1;AABR07060287.1;Sox9;Bbx;AABR07029613.1;LOC688583;Sox12;Tox;Hmgxb4;AABR07040480.1;Tox3;AABR07067274.1;Hmgb2;Sox30;Sox8;Hmg20b;LOC691030;Sox11;RGD1559962;LOC108349189;Pbrm1;Sox17;LOC108349258;AABR07040430.1;Prkag1;AABR07009373.1;AC127605.1;Lef1;Sox7;Hmgb4;RGD1566225;Hmgb2l1;Pms1;Hmgxb3;Sox6;Tfam;Nsd2;Sry;Ubtf;Tox2;Hmgb1;Cic;Tox4;AC123471.1;Hmgb3;Ssrp1;Sox5;Tcf7l2;AABR07041586.2;Sox10…		Bbx;Ubtf;Ssrp1
TF_bZIP	52	0	1	0	Nfe2l3;Creb3l1;Cebpg;Batf3;Fosl2;Cebpa;Bach2;Ddit3;Batf;Creb3l4;Atf1;Atf4;Creb1;Jund;Cebpe;Junb;Creb3l3;Atf2;Hlf;Dbp;Creb3l2;Nfil3;Maf;Fosl1;Cebpd;Fos;Fosb;Tef;Crebzf;Creb3;Mafb;Jdp2;Atf6b;Creb5;Jun;Nfe2l1;Atf7;Crem;Atf5;Nfe2l2;Mafa;Batf2;Bach1;Mafg;Maff;Nfe2;Atf6;Cebpb;Xbp1;Atf3;Mafk;Nrl		Jund
zf-C2HC	6	0	0	0	Myt1;Myt1l;St18;L3mbtl3;AABR07068728.1;L3mbtl1
zf-MIZ	7	0	0	0	LOC103693776;Pias1;Zmiz2;Zmiz1;Pias3;Pias2;Pias4
ETS	28	0	0	0	Etv2;Elk3;Etv1;LOC100910896;Fev;Gabpa;Ets2;Etv3l;Spdef;Etv5;Elk4;Etv4;Ets1;Ehf;Elk1;Erf;Spic;Etv6;Elf1;Elf2;Elf4;Elf3;Spib;Spi1;Fli1;Elf5;Erg;Etv3
T-box	17	0	0	0	Eomes;Tbx18;Tbx15;Tbxt;Tbx3;Tbx20;Tbx22;Tbr1;Tbx2;Tbx4;Tbx10;Tbx6;Tbx19;Tbx21;Mga;Tbx1;Tbx5
RHD	10	0	0	0	Nfat5;Nfkb2;Rela;Nfatc1;Nfatc2;Nfatc4;Rel;Nfatc3;Nfkb1;Relb
CP2	6	0	0	0	Tfcp2l1;Ubp1;Grhl2;Grhl3;Grhl1;Tfcp2
Tub	5	0	0	0	Tulp4;Tulp3;Tulp1;Tub;Tulp2
ARID	11	0	1	0	Arid3c;Arid5a;Arid1a;Arid2;Arid1b;Arid3b;Arid4b;Jarid2;Arid4a;LOC100912163;Arid3a		Arid2
Pou	14	0	0	0	Pou2f3;Pou5f1;Pou5f2;Pou4f1;AABR07027925.1;Pou3f3;Pou3f4;Pou6f1;Pou3f2;Pou1f1;Pou2f2;Pou4f3;Pou2f1;Pou4f2
HMGA	3	0	0	0	RGD1564836;Hmga1;Hmga2
Fork_head	39	0	2	0	Foxc1;Foxo1;Foxl2;Foxo4;Foxn1;Foxj2;Foxe3;Foxp4;Foxd2;Foxa1;Foxr1;Foxa3;Foxk2;Foxd1;Foxi1;Foxn3;Foxm1;Foxr2;Foxo6;Foxp2;LOC680273;Foxl1;Foxe1;Foxp1;Foxa2;Foxn4;Foxk1;Foxf1;Foxo3;Foxs1;Foxj3;Foxi2;AABR07006487.1;Foxg1;Foxp3;Foxc2;Foxn2;Foxh1;Foxi3		Foxj2;Foxk1
MBD	9	1	1	1	Mbd1;Setdb1;Setdb2;Mbd4;Mbd3;Mecp2;Mbd2;Baz2b;Baz2a	Baz2b	Baz2b	Baz2b
THR-like	20	0	0	0	Rara;Nr1d1;Nr1i2;Nr1i3;Nr1h2;Thra;Nr1h4;Rora;Ppard;Nr1h5;Vdr;Rorb;Rarb;Rarg;Nr1h3;Ppara;Thrb;Pparg;Rorc;Nr1d2
E2F	10	0	0	0	E2f6;E2f8;E2f7;E2f2;Tfdp1;E2f3;E2f5;Tfdp2;E2f1;E2f4
MH1	9	0	0	0	Smad5;Smad1;LOC103691556;Smad4;Smad6;Smad7;Smad9;Smad2;Smad3
IRF	9	0	0	0	Irf3;Irf1;Irf9;Irf4;Irf5;Irf6;Irf2;Irf7;Irf8
ESR-like	9	0	0	0	Nr3c2;Esr2;Esrra;Esr1;AABR07031756;Pgr;Ar;Esrrg;Esrrb
NF-YB	1	0	0	0	Nfyb
DM	8	0	0	0	Dmrt2;LOC100910371;Dmrtc2;Dmrtb1;Dmrta1;Dmrta2;Dmrt1;Dmrt3
CTF/NFI	4	0	0	0	Nfib;Nf1x;Nfic;Nfia
RFX	7	0	0	0	Rfx4;Rfx5;Rfx1;Rfx3;Rfx2;Rfx7;Rfx8
CUT	6	0	1	0	Cux2;Satb2;Cux1;Onecut1;Onecut2;Satb1		Cux1
Runt	3	0	0	0	Runx3;Runx2;Runx1
GTF2I	3	0	1	0	Gtf2i;LOC100912262;Gtf2ird1		Gtf2i
SRF	5	0	0	0	Mef2a;Srf;Mef2c;Mef2d;Mef2b
Miscellaneous	2	0	0	0	Nr0b2;Nr0b1
NDT80/PhoG	2	0	0	0	Myrfl;Myrf
PAX	8	0	0	0	Pax7;Pax3;Pax6;Pax8;Pax2;Pax4;Pax5;Pax9
CG-1	2	0	0	0	Camta1;Camta2
SAND	5	0	0	0	Gmeb2;Sp140;Deaf1;Gmeb1;Sp110
NCU-G1	1	0	0	0	Glmp
TSC22	5	0	0	0	LOC100362783;Tsc22d3;Tsc22d4;Tsc22d1;Tsc22d2
TEA	4	0	0	0	Tead1;Tead3;Tead4;Tead2
THAP	8	0	0	0	Thap3;Thap2;Thap11;Thap12;Thap7;Thap4;Thap1;Thap6
zf-GATA	16	0	0	0	Gata5;Gata3;Gata2;Mta2;Zglp1;Mta3;Rere;Gata6;Gata4;Gatad2a;Gatad1;Gatad2b;Gata1;LOC108348091;Mta1;Trps1
zf-CCCH	4	0	0	0	Mkrn2;Zfp36l2;Zfp36l1;LOC100911319
TF_Otx	4	0	0	0	LOC100911492;Crx;Otx1;Otx2
CSD	9	0	0	0	Lin28b;Ybx3;Carhsp1;Ybx1-ps3;Ybx2;LOC100364335;Csdc2;Lin28a;Ybx1
CSL	3	0	0	0	Rbpjl2;Rbpjl;Rbpj
STAT	6	0	2	0	Stat5a;Stat1;Stat6;Stat2;Stat5b;Stat3		Stat5a;Stat5b
NGFIB-like	3	0	1	0	Nr4a3;Nr4a2;Nr4a1		Nr4a1
zf-BED	2	0	0	0	Zbed4;RGD1560108
HPD	2	0	0	0	Prox2;Prox1
zf-NF-X1	2	0	0	0	Nfxl1;Nfx1
HTH	1	0	0	0	AABR07006860.1
LRRFIP	2	0	0	0	Lrrfip1;Lrrfip2
DACH	2	0	1	0	Dach1;AABR07039806.1		Dach1
CSRNP_N	3	0	0	0	Csrnp3;Csrnp1;Csrnp2
GCFC	2	0	0	0	Paxbp1;Gcfc2
COE	4	0	0	0	Ebf2;Ebf3;Ebf4;Ebf1
HSF	4	0	0	0	Hsf4;Hsf1;Hsfy2;Hsf2
AF-4	5	0	1	0	Aff1;Aff4;Aff3;Aff2;LOC499407		Aff4
P53	4	0	0	0	Tp63;AABR07008242.1;Tp73;Tp53
SF-like	2	0	0	0	Nr5a2;Nr5a1
GCNF-like	1	0	0	0	Nr6a1
NF-YC	1	0	0	0	Nfyc
zf-LITAF-like	3	0	0	0	Cdip1;AC129395.1;Litaf
PC4	1	0	0	0	Sub1
CBF	1	0	0	0	Cbfb
NF-YA	1	0	0	0	Nfya
GCM	2	0	0	0	Gcm2;Gcm1
Nrf1	1	0	0	0	Nrf1
Others	76	1	3	1	Zfp207;Nme2;Blzf1;Rag1;Cebpz;Plek;Myef2;Lyar;Yeats4;Rbck1;Cc2d1a;Crebl2;Preb;Akna;Plscr1;Znfx1;Parp12;Nfrkb;Hif1a;Tax1bp1;Prdm11;Xpa;Cnbp;Elmsan1;Gabpb1;Gpbp1;Spz1;Ciz1;Casz1;Maf1;RGD1306271;Zfp395;Zgpat;Zfp503;Purg;Fam170a;Zfp609;Setbp1;Smarcal1;Tcf25;Carf;Zfp511;Zfp318;Pura;Cpeb1;Phtf1;Capn15;Gon4l;Crebrf;Gabpb2;Epas1;Mllt10;Zfp608;Ahctf1;Tet2;Cenpt;LOC103690173;Ltf;Cenpa;Rfxank;Gpbp1l1;Znf750;…	Purb	Elmsan1;Zfp608;Purb	Purb
